# Supplementary material for: Systematic identification of long intergenic non-coding RNAs expressed in bovine oocytes
Source: Reprod Biol Endocrinol. 2020 Feb 21;18:13. doi: 10.1186/s12958-020-00573-4 (PMC7035783; doi:10.1186/s12958-020-00573-4)
Supplement: Supplementary file 1 — Additional file 1: Table S1. List of lincRNAs identified in bovine oocytes. [file 12958_2020_573_MOESM1_ESM.xlsx]

## Sheet: Sheet1
Additional file 1: Table S1. List of lincRNAs identified in bovine oocytes
LincRNA name	Genome_location	Strand	Sequence
CUFF.64.1	chr1:3288583-3296143	-	ACAACCAAATGAGCTCAAAGGCCCAATCAGCCATTTCACTGACTCTGCTGAATGCACAGGGTATTGCAGAAACTTCTAGAACCTTCTAGACCAGCCGACGGTTAACTATTTTATCTGTGGTCGGGGGCTCTAAGAGCCGAGTTCATTTAGCAAAGTAAAGACCTTCTGAGCCTGTTAAGTCAACGGGAATAGAGAAAGAACTGCTCACTAGACCACCTGGCGAGGAAGTCCTCCAGGGAGGGCCCATGACTGCCCTTCCTTCTCAGACAATCCGAAGACGCTTCTCAGACAATCCAAGATGCTTCTCAGACCTCGAGGCCATAGGAGGGAATCCTTCCGGATTTAAACATGTAAAACGAGGTCTCTCTTGCAAGGATTTTGGCATCCATCAGAGCAAAC…
CUFF.74.1	chr1:3763816-3774497	+	GACTTGAAAGGAAGGCGGATAACAAGGCGGGGCTGCTCTTGATGCCTCACACGCCCTCCGCCTCTGGGAATGGGCCCCTTCCTCACAGCGGGTGGAAAGTTTCGCCTTTGTCTGCAGCATTTGGgaacaaggctttacacaattgtggaagaagctggaggtgtaaagatttgaagggaggagttggaggatcagagaaacatcactcaccagaccttctgaaacactggcgcaagtggaccatgaagggctggaaaggagtCTGGTCCAacaatgggcacaatattcataaaatacaacaaaatggaacaaactactgatgcacaaaacaacgcgatgctgagtgaatgaagccagaccccaaagagtatggactacatgatttcacttacatggaat…
CUFF.74.2	chr1:3763816-3774497	+	GACTTGAAAGGAAGGCGGATAACAAGGCGGGGCTGCTCTTGATGCCTCACACGCCCTCCGCCTCTGGGAATGGGCCCCTTCCTCACAGCGGGTGGAAAGTTTCGCCTTTGTCTGCAGCATTTGGgaacaaggctttacacaattgtggaagaagctggaggtgtaaagatttgaagggaggagttggaggatcagagaaacatcactcaccagaccttctgaaacactggcgcaagtggaccatgaagggctggaaaggagtgtgagaaggcaggggtgtcacctgaggagggtgcctgctggaggcgtctaagCTGGTCCAacaatgggcacaatattcataaaatacaacaaaatggaacaaactactgatgcacaaaacaacgcgatgctgagtga…
CUFF.74.3	chr1:3763816-3774497	+	GACTTGAAAGGAAGGCGGATAACAAGGCGGGGCTGCTCTTGATGCCTCACACGCCCTCCGCCTCTGGGAATGGGCCCCTTCCTCACAGCGGGTGGAAAGTTTCGCCTTTGTCTGCAGCATTTGGgaacaaggctttacacaattgtggaagaagctggaggtgtaaagatttgaagggaggagttggaggatcagagaaacatcactcaccagaccttctgaaacactggcgcaagtggaccatgaagggctggaaaggagtgtgagaagCTGGTCCAacaatgggcacaatattcataaaatacaacaaaatggaacaaactactgatgcacaaaacaacgcgatgctgagtgaatgaagccagaccccaaagagtatggactacatgatttcactta…
CUFF.123.1	chr1:18379438-18505996	-	CACATAACTCTCCACTTCTAATGAACTGGTGCGATAGAGACAATAAGAATATATTTACAGAAGGGACCATAAGAACATCCTGAGAAGAACTCAAGATAGAAAAAGAGAATCAAGACCATTACATATAAGccctagaccctggtgatttggaagcagaacctttgagaaacaattagatttaaaagaggtcctgttagtgaagcccttacaatggagttgacatcttcataagagatatcagcgagcttgcttcctctccctctgccacgtgaggacacagcaggaagacagccatgtgtctacaaggcagaagaaagccctcaccagaaccagaccatcctgccgccctga
CUFF.127.1	chr1:18831427-18881711	-	tgagcaggcaccaagactagcaccaaggaagaaaaagagccatctgaggaagacacagtcattgttcaaagtttccagaagagaagatgaggtgcctagaagttgaatttttcaaggttgcatgGATGTGGCTGTTGGCTCTTTTCCATATCCTGTCCCCATTCTTCAAGGGAACAAAGTAACTGGATTTGTTCCACTCACCCGCAAACAGAAGCTTACTGAAAGCGAAAGCATTTTGAAGAAGATACCTAAGGTTTAGTCTTGCTCCACAGGATCTCCAC
CUFF.142.2	chr1:22597816-22721903	+	gattgaacccaggtctcccgcattgcatgcagatttcctgaccatctgagccaccaggaaagGAAGTTTGGAATTTAAAATGCAATGGCCAGAAGACAGGGAAGTGTTACTAGAAGAATGTGGACATGGACTCCAGGACTGCTGATAATGACTGTGATCTTTTGGAGTCAGCAGGGGAATGGACAAGGCCAAGGTGACAGCATTATCCCAAGACACCTTATTTAGCTGGAGCAAAAGCTCATGAGATCTGCTGCCTGTATTGTTAAGCTTTTTGTGCGTGTTTGGAAATAGACTGCCCTAATGGC
CUFF.169.1	chr1:28484456-28515736	-	TCGACTTGATCCAAGAGCATGGAGGAGTCTTGCCCTCCACTGCATCTCTGCTTGTGAGTTTTCCCAGTAAACCTTCTCTTATTTTACAATTGCACCTTGCAGTACCATGGTGTATGTGTGTCCATGGATGACAAATGCAGAAAGAATCAATTAATTATAACAAAAAGAAAGGGATACCTCAAAGTTGCAGTCTTTGAAGTGCCTTCTACAAGCATGGTTCCAAGTAAATTAAACATCAGAATTTGAATATCTATTGGGTTAGATAAAAGGCTCACGCTGGTTTCTCCATAACGTCTTACAGAAAAACTCAAATGAAACTTTTGGCCAATATTAGGATTGACAATGCTCCCGAATTTATTGAACTCCTGCAATAGTCCTGCTGTGCTTGCCCATTTTACT…
CUFF.173.2	chr1:29329097-29330201	-	ctgcctcccatgtctttctttggtctcgaagttgggcagtcacaaagcttgcatgcctgcggggtgtagcccagcaCCAGTATATTTGATAAAACAGGAAAACAATGTTAATATAGTTGAGTGATTTTGTTCCCCATCATTTTCATTTCCACTAATTCCTTTCTGTTCTCTGTCCCTCCAAATGAGAAATTTGGAAGAAAAACAATCTGCTAGGGACTGTTTCCTCTCATCTACTTCCCAAATTCCAAAGTTAATTAAAATTTTTAAAAGATACTAAGGAAAAGCTCAGAAGAGGAAGAGAGAATGGAGAGAAAAAGAAGTTAAACCTTGAAAACCGATACTCTTTCTGGATCTGACACAAGAAGGATCAGAAGAAACACGTGAAGAACAGGACTGAGA…
CUFF.173.1	chr1:29329097-29330956	-	aaactacacaaccaattttctgagtctacagcttacagatggcagttcatggaacttctaaaccttcatgtatcccaatgtcttataatagatcctttcatagataaatagAAAACCGATACTCTTTCTGGATCTGACACAAGAAGGATCAGAAGAAACACGTGAAGAACAGGACTGAGACCACCCCAGAGTCTGCTGTAGAAGAGAACAGCATTCTCATAAAGAGATTTCATTTGGTTAGATAATTTAATGATTTTTAGGAAAACTGGCTTGTGCCTTGTGGACTGCTTTGTCATTTATTGTCCTGGAACTAGCTTAACTTCAAAAACGTGTTAAATCAGTGTACCTGCTACCAACAGTTCCCACAGAACATCTATGGCTGATCTGTCTTCACCTATA…
CUFF.212.1	chr1:35813964-35821738	-	GTAGTAGGAGGAAGGTAGGATGCACGGGAAGTCCTCGTTTCAAAGATGAAAAATGTAGCTCAGAGATGCCAACCCTGTGGTCATCATTAAGCATGTGTGTGTTAGGTACATGTTTTCCAACAGACACCGAATTAAACAGTGATATTTCAGtattgatgtatggatgtgagagttggactataaagaaagatgagtgctgaagaattgatgcttttgaagtgtggtgttggagaaaactctttagagtcccttggagtacaagcagatccatccagtccatcctaaaggaaatcagtcctgaatattcattggaaggactgatgctgaagctgaaactctaatactttggccacctaatgcaaagaactgactcatttgaaaa
CUFF.212.3	chr1:35815245-35821734	-	TAGGAGGAAGGTAGGATGCACGGGAAGTCCTCGTTTCAAAGATGAAAAATGTAGCTCAGAGATGCCAACCCTGTGGTCATCATTAAGCATGTGTGTGTTAGGTACATGTTTTCCAACAGACACCGAATTAAACAGTGATATTTCAGAAAGTGTTATAATCACTGGCTCCAACTGGACAGGACAGATGATACCTATAGTGCTGTACATGTTCCTGGAGGAAGTTTCAAAGGAGTCACATGGCCAGAAATGACAGCTGCGGTTCCAAGAGTTACATGTATTAACAGAGACAAAGAAATGAAGCACAGATTAATTCGTTGCTTTTTATGAGTGAAGATACAGTGTCTCAGAAACCCCCAgtagcagtcagggcctactcaaaagagaaatcacccagcaggt…
CUFF.212.2	chr1:35815245-35821742	-	TTGAGTAGTAGGAGGAAGGTAGGATGCACGGGAAGTCCTCGTTTCAAAGATGAAAAATGTAGCTCAGAGATGCCAACCCTGTGGTCATCATTAAGCATGTGTGTGTTAGGTACATGTTTTCCAACAGACACCGAATTAAACAGTGATATTTCAGTGGCCAGAAATGACAGCTGCGGTTCCAAGAGTTACATGTATTAACAGAGACAAAGAAATGAAGCACAGATTAATTCGTTGCTTTTTATGAGTGAAGATACAGTGTCTCAGAAACCCCCAgtagcagtcagggcctactcaaaagagaaatcacccagcaggttaaacacagaagttttatataagaattattaactatgataaaacagtaactata
CUFF.260.1	chr1:42656174-42659366	-	TGAGTGAGAGGAAAACTGTACACAATCCTCTGAGAACCGCTTCTCAGTGTGGACATGCCTGTGCCCTGGCCTAGAGCAAGGAAGGGAAATCAGTGATGGCCAATAAATGGAGAGAAGAAAAATGTGAAGAATGAAAACGTGTGTGTGAGAGAGAGAGAGAGAGAGCAAGAAAAAGCCCAAGAGGAAAGTCCATCAACCACCAGGTCCAGGAAGATGAAAACCCTGATCAGATGCAGAAGGTTGTGGTAGTAAGTGGTAAGCTGCCCATTCCTCCTGGGATGACCAAAAGATCTCCAAAAAGAAAAAAAGAAATATGAACACGGAAGAGACTGAGATCCTACTGCTCCTCACTCTCTTTTATCATATCCTCATCCGCAAAATATCATTGCTTCTTAGCCT…
CUFF.273.1	chr1:43078119-43153408	-	aagatggtgaagaggggcatgcgctgagtagtacaagtccggagtcactggataaaggcaacaaaaacgggttctctcctagagcctccagctaggaacgcagcccagcagagacatcttgattttagcccagtgaaacccaggacagacttctgacctccagaactAAGACAAGGAAATATTGCTTCAAGAGATCTAATTTGAACACTGTGCCAGCCAAGTAGTCTTCAGAAATATTcacaatccatgccttcaagcaatgttattgagtacctactgcaggaggtggaaaatacacaaataagTGGGTGAACAActgaagcctggaacaacccagccctgaccatggaaaccacagcagtgccctatgaaatggggaggcaatgactgggaagaaac…
CUFF.278.1	chr1:43148822-43149611	-	gccttctcTGACATGTGATCTAgtgaggacatcatttttacagaagaagagatcgagggacaaagaagaagttcacaaagctagcagtcggtagagcggagatttaaatgcagtctgtctccattgttcacgtgggtctgacactactaGTATGGCcagtttttgctttatgtattttaagaccatattattaggcatttagaaacttgtgcatgttatgatttgttatacagttattgcctctattgtgtattttctccatccatgctttttgcctttaattctattgtgtatgatattatttctgtaacagtttcctattggttagtatttgactgtgtttttttgttttttgtttttttaactatactgtgcaattttttcttcttgtttgaacac…
CUFF.362.1	chr1:46650142-46692126	+	gattggaagaccatgtgatggaagcagaaggaaagagaaccgtagagagaagatactgtactactgactttgaaaatggaggaagaggtcacaggacaagATACCTCGACCATGAGTATTGGTTTCAATAAGGAAGCAAAATGAATTCCGACAGGAAGGCTGGGAGCTGTGACTGGCAGAAGAAAAATGAAGCCCAACAGCATGGAGGACTTACtatggca
CUFF.402.1	chr1:53369169-53413141	+	TGAGGGTCAGCGGGCGTTTCTGTTGTGCTTTCTTGATGGTCCTTAGGAGGCTCTAGGAGGCTTGGAACGGTCATCAAGGGCCTCTGAGTCGGCGTCTGAGTCAGCTGGTAGCAAATAAAAAGATTAAAGAGAGAGGGAGGCGTGCAGTATTGAAGGCTACCATAGCCCACTGCTGTTGACCTGGAAAATACCAATACAAGGAAGGAGGCATAACTGACTGCTTTACAGGTCTCAAAAAAAGCTTGTGTATCAAGCAGTTTTCCTACCAGCTATATGAAAAATCAGGTAATGAGGACCCTAGTTGCTAGGATGACAGCGTGAAGAAATATGATACTTGTCTTCAAGCCTTTTAAAAAAGTATATAGGTGTGGATATCATTCAGATGAGAAGGTTGGCATG…
CUFF.402.2	chr1:53403640-53413141	+	TTGAGACCCTCTAGGGTTCCTCAGAAACTGACAGATCAAGAAATGGATTCGGTGCCTATTTGTTCAACATTCCTGGTTTTAAGTAATTTGAGGTAATGAGGACCCTAGTTGCTAGGATGACAGCGTGAAGAAATATGATACTTGTCTTCAAGCCTTTTAAAAAAGTATATAGGTGTGGATATCATTCAGATGAGAAGGTTGGCATGTGGAGCCACTGTTCCTATGAGAGCAAGTATATAATTTCCTACAGAGTGACGACTTCATAATGCATATCCAATAAAGTCCATCCTGTCTCCCAGTATTTGATGCCTTAGTCTTACCATGAGCTCCAGAGAGATTTTTCTGCTGTGGAACCTGTTGAAACTTGTTGACCATTTGCACCATTACAAGGAAACAGAA…
CUFF.465.1	chr1:58329950-58360668	-	GGATGGAGTGACCCTGCCGTGATCTGTGCATGAGGAGGGAAGGCAATGAAGACCCAACAAACGGTGGCTTAAATAAGATGTGACTCACAGGCAGCAGGCCAGCGTTAGTGCAATGTCTGCTGGGACTCATCAAACACCTGGCTGCTTCGCTATTTCTGCTCACCAGCCCGGTATTCTGCAGTTCTTTTCTTGGGGAAAGAGGCTGCTCCCGGTGTCCACACTCACAGCTAAAGGACAGGAGGTCAACAAGGTGCAATTGCTTAACGGCCGACCCCAGCGAGGtctgctcacatcttgttggccagaagtggatcacgttgcccgtcctgactgcaatggaatctgggaagctgaatggtttaactgacggcacagctgcagcttacagtaaaatcaagg…
CUFF.466.1	chr1:58362610-58379082	+	GACTCTCCCAGACTGACTGCACTCTCACCAGACTCTCATCCTCTTTCTCACATGAACTTAAAGGAATGCAAGTGGTAGAGGGGACCATGGCTGTTGAAATACACCCTCTAGGATTTCATCACTGTTTCATGTGTTAAAACAGCCTTAAGTTTGATCATCAGCAACTTACTCCTCTGCACAGGTTGTCCTGGTAAAAGAATGAGATGCTTATTTttttcccaacttcactgagatgcaactgacatatagcaatgggagttcatggtttccagtcttacttttaagtccctaagccatttccagTCTGTACAGTCATCCAAACTGGATAATTCAATCAACTCTCCACTTGGAGCCTCGTATTTGATGATCTCATTGTTGTGGAAATCTGAGAGATGAAAA…
CUFF.466.2	chr1:58362610-58379082	+	GACTCTCCCAGACTGACTGCACTCTCACCAGACTCTCATCCTCTTTCTCACATGAACTTAAAGGAATGCAAGTGGTAGAGGGGACCATGGCTGTTGAAATACACCCTCTAGGATTTCATCACTGTTTCATGTGTTAAAACAGCCTTAAGTTTGATCATCAGCAACTTACTCCTCTGCACAGGTTGTCCTGGTAAAAGAATGAGATGCTTATTTttttcccaacttcactgagatgcaactgacatatagcaatgggagttcatggtttccagtcttacttttaagtccctaagccatttccagTCATCAAATATATTGGAGCAACTGGGCACATTCCTCCTCTGGCAGCCCCTGTGATAACCAGCATGGAGAGTCTGTACAGTCATCCAAACTGGATAA…
CUFF.540.1	chr1:63392877-63393806	+	catcaaggaaactggaaaactatgtgagagggagatgagaaggagaaggagggtcaaaatggtggtaggatcttactAACACTGGAATGATTCATGAGATAGCAGAATTAATTTGAATACTTACATAAAGGTTTCTAAATTTTTATTAAAATATCAAGTTCTTAGACTACATATCAATTACAATCCATTTTTTGTTTTAAATATATTTAAGGAGGTTAGTAAACTTTGGGGGCTTCATTTTAGTAACATTGGCACTTACAATAGCTAATGCACAGGCAAGAGTGGGTTTCACTAAAGAATAAGAGGTTCGGGCAGGCAGTAGAAATTTACCTGGATGACAAGAAAAGCACAGATTGCTTGAGGCTGAAGTGGCTGTGGTGACACTGGCCAGAGTATGCA…
CUFF.554.1	chr1:63718677-63733469	-	gggcaggaggagaaggggatgacagaggatgagatagctggatggcatcactgactcgatggacgttagtttgagtgaactccaagagttggtgatggacagggaggcctggcatgctgcagttcatggggttgcaaagagtcggacatgactgagcgactgaactgaactgaactgaactgatctaaagtgattctcgaacttgggctgtatgttggaatcacctggagaactttacaaactatggatctacacctggacattctgattcaattattttggagtgcagcctgggcatcaaatcccctggtggctcaaatatatggcctggactgagaacTCCAGGCTTATGTCTAGCCTCTGGACTGAATttctcagtgtgtggttcctgggcccaca…
CUFF.554.2	chr1:63729688-63733469	-	gggcaggaggagaaggggatgacagaggatgagatagctggatggcatcactgactcgatggacgttagtttgagtgaactccaagagttggtgatggacagggaggcctggcatgctgcagttcatggggttgcaaagagtcggacatgactgagcgactgaactgaactgaactgaactgatctaaagtgattctcgaacttgggctgtatgttggaatcacctggagaactttacaaactatggatctacacctggacattctgattcaattattttggagtgcagcctgggcatcaaatcccctggtggctcaaatatatggcctggactgagaacTCCAGGCTTATGTCTAGCCTCTGGACTGAATttctcagtgtgtggttcctgggcccaca…
CUFF.570.1	chr1:64250412-64271961	-	gtggagcttgaatgtttgcattgctaacaaaaatgttctccagtaatactgatgctactggtctggggagcaaactgtgagaaccaTCCTTCTAGAGTTTCAAGTGGGTTAATATTACCAGAATGGATGGGATGGAAATCTTCAAAATCTAAAGAATATCTGTTTTCCTTGAAGGCCTGGTGTACCACCCTCTCCTCAATGAAGCC
CUFF.607.1	chr1:65649027-65650328	+	GGCGGCGGAGAGGCAAGAAAGACGCCCATGCTCCAGTTCCCAAGAGCAGGAATTATGTCTGAGATTTTACCCTGGACTTTCCCCGGATCTCTCATTCTCTACAGCCAGACCCTTTCCTGTGGAACATACAGAAAGTGTATCCCCAAGCCCTCAGCTGCCAGGCACAAAAGGTTTAACATCTTCTACCAAGGCCTGCCCTAtttacctcaaaaagaactaagaatgctgctttCCTGAAAAAACAAACACACAAACCTCCGCGGCCGCCCCCGACCCCCTCCGTAAGCCCCCTCTGCAAGTGGAATACAGTCTGAACTACTttcacagttggaaaccagcttaccattctaaccttctatctgctcaacacctgtgttccagttatactgtgttgggcca…
CUFF.631.1	chr1:66096452-66145175	+	AGGAGGGGCGGGGTTTAGAAGGAGCAACGGCCCGGATGCAATGGGAACTCAGGCAAAGGTTAAGAGGAAAAGAGCACAGCCTTGGGTGTCCAGAGAGTCAGGTTTAAAGAGTCCAGAGGTTGAGATTGTGGCCTTGCCAGGGCACCAGTGTGGGAGATGGAGGTGCGAAGAGAGGATTGAAGAACTGCAAGTAACCGAGGAATCCAGACTTAGAGGAACTTTTAGGGCATTCAGACAAGGCGTTCAAGGGAAACGCTCTCTGATTGCGTTTCAGGGTTGTTTGGCTCCTGCGTCAGTAGTTTTGGGTTTCAAGTTTAAAAAAATCTGACAAAAGTgtagattaaacaagatggatatgtacttttctctcaaaaaacctaaagttggaaacttggtagt…
CUFF.868.1	chr1:73132229-73136716	+	GGGAGACAGGAGGAAGAGTAGATGGAAGCCTGGTAGATAGTGATACAGGCCTCATACAGACCAACCCTGATCCTCCAGTGTCACCTCTCTGAGCCCTACCTGTGATACGGAGATCCAGGGCGGGCCTGACCACTGAACAGAAATGCGCTTGGACTTCTCGGCTCCGCACAgaCTCTTCACACCCGTCAAAATATGAAACTGCCTGCCACCCAGCTCCAGAGGAGGACAGTGAGGAGACTTCTTTCTGCCCCTCCCATTTCGTGTCCAGATGAATGAACCCACAAGAACTTGGCTGGCTGGCTCTGAATTCCGACTTCCCT
CUFF.876.1	chr1:73300052-73301165	+	CAGCCCACAGGCCAGAGGGATGGGCCAGTATGAGgtaaaaataaatgcagaaagaagtcccaatctttgcctcttatgccccaggacatcatctcccacagcccctggACTGAGCAGCTGTATTAGCGGCCAGAGCCGGAACCCAGCCAGACCCTCTGGAGAGCAACTGTGTACACAGCTCAGAGGGAAGCTCAGGAAATACATTTAGTCCACTTCTAAGCCACTGAGACTGATCACCCATTCATCCATCCCTCCatccattccattcacccattcgctcatctgcctactcccaagtctcaggctctgcacatggcttagagattcattggtgaataaagcagacaagacctctgcccttgagaagtttaccatctaataaaagaaaacacact
CUFF.899.1	chr1:74652935-74654662	-	CAGCAACAACTTCTCTAAAACCACATGTGGCCAGTGCAGAGTGCCAGATGATAAGTAGGAACGCCTCCATGAGTACCCTGTGAGGAGGGAACTTCACGGGTCCAATCAAAGCACATCAGGATGGCAAGAGCTAAAAGACAAGTGGTCATCATCTAGAAGACACAACTTTCTCTCCCCTGCTGTAAAAGTGTGCCTCGTGGATCTCCAGGAGCCTTATCAGACTTCAAGTCAGCACCACCCCAAGTAGCCTACAGGCTCAGACACTTTTGAGAAACTATAATAAAAAGAAGGACAGACTCACCATTTCGTTCTCCTCTCCTGGGTTGAGCAAAGCCTGATGGTCCTTTTCTCTCTCCTTCTCCATCTGAACAGGACCGCCAAACTAATTCCCTGGGGAAA…
CUFF.972.1	chr1:80722455-80732120	+	ctgtcgtccccttctcttcctgcccccaatccctcccagcatcaAAAAATATAATTACAAGGTTTCTACTCTAGACCTCTGAGCTACTGACACCTCAAGACAGAGGAGGGGTGATTTTACTGACTACACTGAGAGTTGTTGAGATCTTGAGACCTTTGTGATCCAGTGTTCATTCCCCACTGCCTCATATTTTAGGGCCTTTGAAGAATGTACAAAATGTGGAAATGCCACATCACTGAAGGCAACAATGCTTGGCTGCTTGCCTAAGGAGAGAAGCAGgtaaaatttccattcatatctgaaagacattttccctggtgtagtattctggattaacagtatttttccttcagtgttttagAGGTTATGTACCAAACAAAGATGTGCAAAAATGGAAAG…
CUFF.982.1	chr1:80882653-80887622	+	GGGGAGGAGGCCACCAGACTAAAGGACGTTCAAAGAAAGGCGGGTGCCCCTGAAGCACCAGGATGGAGTCAGCCCCATGAGACACTCACTAAGCAGTTGTGAACTCCTAGCACACTGAAGCCGCCTCTCCACCTATAAGTAAAAAGAAGAGACGATCCCAAGCACAGAGAGGGCCTGAGTCCGTGGCAGCCTCCCTTGGCACCTCAGACCTCCAAACACTGAGAAAACTCATCCGGAGTCAGATCCAGACGTTTCTTCATCTCAGCTGCCAGGAAGTACGTATTTTGGCACATGGGGACCAAGGAAGGAAGGAATGGAGGAGAACTTACCCCAGAGGCTAGTAAAATATCAGCACAGGTTGTTTGCTCATCTGTGGGaaaacaatagaaaagaaaaaaa…
CUFF.1027.1	chr1:83052921-83053887	-	GCACAGGATGGCAGCAAGAGCAGGGGGCTGAGTTAGCAATCAGCTCTGGCCTTCGGAGCCGGGTTCCTGATCAGAACCTTCCTGTGCGTGTTCGGCTCTCGAAGAAGGCATGtgagtgctgaaccgtgtaggaggcgctttcccacctattccctcaccagaccctcatgacagcctgCCAGGAGAGCAGGAGTATTCTGAGGAAACAACTTCTAAACTGACTGCAGAAGAGGTGAGTAGCTGGGGTCaggaagcagcccgtgcagaggcctg
CUFF.1030.3	chr1:83094019-83135253	-	ggtatgaggtgggatcagacgctgacgctgctggtctggagatacacttggagaaccactAAGGTGATTCTTGCACCAACCTGGCAGCTGTCTTCCAGGACCCTGAGGATTTACCCCATGTGGACGTTACAACTGACCATCACAAGCCGAGCACGAGACAGGATGGAGACTGGTGAAAAAGGAGGAACGCCTTCTGGAGTTTCACCCAGGAAGATCTAGTTCTGTTTGTGCCTGAAGGGAAAGAAGACCAGGGATCCCGGCCTTCCTTCTCCCTCATGTGAGTGACCGTAATCCATGGGGGAATTCATCTCTTGCCCTCACCATGGCCAAGGTCTGCTCTACACATGGGCCCAGAGGCCACACTTTTAGTACTTCGGAGAAGCTGATGATGGCATCTGT…
CUFF.1030.1	chr1:83094019-83135260	-	ttcagcaggtatgaggtgggatcagacgctgacgctgctggtctggagatacacttggagaaccactAAGCTGTCTTCCAGGACCCTGAGGATTTACCCCATGTGGACGTTACAACTGACCATCACAAGCCGAGCACGAGACAGGATGGAGACTGGTGAAAAAGGAGGAACGCCTTCTGGAGTTTCACCCAGGAAGATCTAGTTCTGTTTGTGCCTGAAGGGAAAGAAGACCAGGGATCCCGGCCTTCCTTCTCCCTCATGTGAGTGACCGTAATCCATGGGGGAATTCATCTCTTGCCCTCACCATGGCCAAGGTCTGCTCTACACATGGGCCCAGAGGCCACACTTTTAGTACTTCGGAGAAGCTGATGATGGCATCTGTGACATGGGAGGTCTTTC…
CUFF.1030.2	chr1:83094019-83135311	-	ctggagggcttgttaaaacagaatgctgggccccatgcccagaatttctgattcagcaggtatgaggtgggatcagacgctgacgctgctggtctggagatacacttggagaaccactAAGGACCCTGAGGATTTACCCCATGTGGACGTTACAACTGACCATCACAAGCCGAGCACGAGACAGGATGGAGACTGGTGAAAAAGGAGGAACGCCTTCTGGAGTTTCACCCAGGAAGATCTAGTTCTGTTTGTGCCTGAAGGGAAAGAAGACCAGGGATCCCGGCCTTCCTTCTCCCTCATGTGAGTGACCGTAATCCATGGGGGAATTCATCTCTTGCCCTCACCATGGCCAAGGTCTGCTCTACACATGGGCCCAGAGGCCACACTTTTAGTACTTCG…
CUFF.1033.1	chr1:83159563-83160058	+	AAGGTAGGCGGAAACTGTCCATGAGGGGATGGGAACCTAGTCTCCCCCTAGCGCGGAGGCCAGCCTGGCGTGGGTGATCACACAGCTGCTAGTTTGGAAGAATTTGTTCAAAGCAAGGAACTTCTGCCCACAGTCATCCCTTCCATCTCTCCACTTCTACCCTTGGGCCTAAGACTTCACTGCCTCAGCTGTTGAGGAGTAGACTTCTCTTGACATCATTAATGTGCCCAAGATGCCCTGTTTGCACATATTTGTGT
CUFF.1091.2	chr1:84268391-84318180	+	AGTGTGAGGGCCGAACATCCTTTGGAGGAGATGCCTTTAAATAGTCATCCATAGCAGCGATAAAAACAGATTTGTGTTGCTTTGTTTTGTTTATACCGAGTGGTTTTTCTGTGAAATGCTGTTTTGGTTAAAAGAAGAAATGGCCCCTCGGGAGTTCACACGGCGACTGGCCACAGTGATCACTCATGTCGcacttccgctgctccagtcctcccagcac
CUFF.1117.1	chr1:85157064-85179126	+	tctgaagggagaggttctgggagaaagagtatataagaaaaataagaaaacccgtgaagatttggagatgaagatgaataggggcagttttgagatctttcagcagttcaacatagctagagactgggtggagggcagaaatggaaactgagactaaagaagtaaagaagagTTTGGAAGGTTACATGAAATTCAGGCTTGAAGCTAAATGAAATAGGGAGGTACTGAAGGAGTGAAAGCACAAATTGAAACCTGGAAAGAAATAAGTTGTGCTGGGATGGAGTGAGCACATAAGCAGTGGCACAGAGATAATCAGCGATGGACCACAGACGATGATCGATGCTTCCGTGTTGCCTGGAGCCTCTGCACCTGATGCCATTTGAAACTCCTGCAGGAAAT…
CUFF.1149.2	chr1:86466493-86514656	-	GCATTCGTCTTACTGAAATTGTATTTCAGTGAAGATTCCTCTTCACCCCTTTGAATTCAGAAGGATGGCATAGATGTCTTCAAAATATATTTGAAAGCAGTCTTCCAGCTGTCTCTCCCACAGTGCATTAGACATGTCAGGAGGTTCTTGCAGCACCACTGAAGAGAAATGCTGAGGATTGGAGCAGACTGGAGGCTGTGTGGACTGAGGGGAGGTGGTGTGCTGGGCAGAGTGTGGGAGTTCCATCATCGGGGTCTAGCAGGGTGGAAATACGGGGCTGATGGTATCATGACAGACTGCTGAAGGGAGAGAAGTAATGAAGCAACAAAGCTCCATGCGAGTACTACGttagtctggtcaggctgctataagagaacaccataggcagggtggcttata…
CUFF.1149.1	chr1:86466493-86598971	-	ggttccaggtgatgctgttgctaatgattctggtttgggggccatgctttaagaaccactgATCTAAAACCTAAGGCAGGGTTTCTTTAAGATGGTTTTAAAAGGACTGCCTTGCTCTTAAAAGGACTGCCTTATTCGGTTAAcacccagcatttggtaagaaggcagatcctagattccaaccccaactctgaggaagcagattctctgcgtttcgggaactacagattccgtctcagagATTTCAGTGAAGATTCCTCTTCACCCCTTTGAATTCAGAAGGATGGCATAGATGTCTTCAAAATATATTTGAAAGCAGTCTTCCAGCTGTCTCTCCCACAGTGCATTAGACATGTCAGGAGGTTCTTGCAGCACCACTGAAGAGAAATGCTGAGGATT…
CUFF.1181.1	chr1:88403742-88405030	+	AGTAGTCATGAAAAATATCCCAAGGACAAAGCTCAGATTTTTATAACAtggtgtaatggaaacatcactagactggaataacttggattccactcctgtctgctctaactggttttgtgacctcggcctaataataacctgtttCTataagaaacatagaaaaCAAAAGGGTGTAGATCAGATGGCTTCTAAGGTTTTCTTCCAATTTAATTACAATTTTAAGTCTTGTAAGAAATGTTTTTATCAGACAGCCCTACCTGGAATGTTATAATCAGATGGAATGGTAATTTCTAGAAATACAAGTATGCATATATGACAAAAGGGTGGAAATAAAAATGGTTTTGAAAAACTTATTGCTGTCACTATTTACAAAACAGAATAAACTCCAATGGGTCCTAT…
CUFF.1204.1	chr1:90323106-90334662	-	ggtggtgactggtgtggactgaagacaaaggggcttcatccaagtgatgtcgtctaggagttccagaggacttcaaatatcttgaggaggccagagctacaagatggaaggagcctgggtccctgaatgactgaagagtctgtcacgaatacacagtggattctgacataaggaagagacaaacttttacttactgagtttggggttcctttgtttcagcagctagcattatattaaacaatGTAATCTTCATATTTCAAACTATAAGTTACACTGATGAGGCAGATGCCTTCCTAATCTAATCACACCTCTTTATGTTGAAAACAACCAATCACCCAAA
CUFF.1214.1	chr1:90692488-90693124	-	CCCACATAGATGGCCACGTTGACTCTTTAAGGACCAAAGGCCAGCTTAGTGGAAAAGTATTCTAATGAAATCCACAGGCAGCAGTTATACCAGCCCCAGGATACATAAGCATCAGCAAGAGAAGTGATTGTCAGATGACCCTCCTACTACTGTATTTGGAGTTAAGTTTCCTCGAGGGATGAATGGGCAGCAAAGTCTTTGCAGCTCCAGTGCCTGCTGACACAAGACTCTGGGAAGTGGGGGAGGGAAGGAAGCCAGGAACTGGTAACAACTTCCAGCATTAAAGCAGTGACTAATACTAATTATGCCGCTCCGACCAGCCATCAAGCAGACCTATTTTCGCTATGAATTAATGCAGAGTGACCTACTTTTCTACATAGTATTTATTATTTGTGCTGC…
CUFF.1218.1	chr1:90695050-90716496	+	TAGAATGTTAAAACCAGGTGTTGCTGCCCAGAGGACCGTACTACAGAAAGGAAAGAGGGGGCTTTACCAGTCAGGGGCTGGGAATTGCTCATCCCAGTTTTTTAAAACACATCAAAGTGACAAGCTTTCTTTCATATTCAGTCTACCCTTCAAGCTTTGCCTTGTGGTCAGCTGGGGAGAAGAGGCTTCATAACACTCAGCTTTGGATATAAATGCTGGCTCACCTTCTGGAGCAGAACCTCTTAAGGTTCCTGGAGAAGGAAGACATTGACACTTGTAAGAAGCTTTGTCCTCTCGGGTATAGGGAAGCAGCCCCTTGGTGGCTTTGAAGGAGATGTGACAGAGGCCAGTGGAGAAGgggaacagtgttccaggcgagggaagagtaaagccatgtcc…
CUFF.1218.2	chr1:90695050-90862333	+	TAGAATGTTAAAACCAGGTGTTGCTGCCCAGAGGACCGTACTACAGAAAGGAAAGAGGGGGCTTTACCAGTCAGGGGCTGGGAATTGCTCATCCCAGTTTTTTAAAACACATCAAAGTGACAAGCTTTCTTTCATATTCAGTCTACCCTTCAAGCTTTGCCTTGTGGTCAGCTGGGGAGAAGAGGCTTCATAACACTCAGCTTTGGATATAAATGCTGGCTCACCTTCTGGAGCAGAACCTCTTAAGGTTCCTGGAGAAGGAAGACATTGACACTTGTAAGAAGCTTTGTCCTCTCGGGTATAGGGAAGCAGCCCCTTGGTGGCTTTGAAGGAGATGTGACAGAGGCCAGTGGAGAAGGTTTAAGTCCAGTGTTTTGAAGCAAAGACTCTGAAGGAGCT…
CUFF.1248.1	chr1:93498487-93502660	-	aacacctggtactgtgctgagcactgagcattgaaaagaaataaagacagacagaatatctgcctttttggatatcaaatctggtgtggaaaatggataataaccaagtaaactactaagtacacaattacaattggtgATGAAAGTGTCTTGGTGGAGCCCCATTGAAAAGAAGAAATTTAAAACTGGAAGAAAAATAAAAGCAGTGTGGAGAGAGGGACGAAGTTGGCTTCCAGCAATAGGACCtgcagagagttggacacgattgagcaactgaattgaactgaactgaGTGGTAACCCAATAGGGCAAGATACATTTCTAAACAGAGACCTGTTCTAGAACCAGCAGAGGCAACCCTAAGACCTGCAGAGACAGTCACCATATGAGAGCTAACCT…
CUFF.1409.2	chr1:95817781-95821785	+	CAGGGGACAAACAGAAGAAGAACAAAATTGGGAATGTGAAGAGGAAGAGCTAGACAATACTGCTGACATGATCATTATGAACCCAGTGTCTACTTTGTCTTTGGCCTCAAGTTGAATATACATGGCAGAAATCCAGAGGGGGAGCATGAAGACTCAGGTAGTTGGGGATGTTTGGAGTCTTTCTACATCCTTGTTGATGAGACCAACATTTTTCACCTGCAAAGACTCTAGGGCCTAGAGGGGCCAAATACTTGCTTAAAGTGTCAAACCTGCTAAAATGCCAGGATTTTGTACTCTGTTTTAACGTATCTATGCATCCATATTTTTACTTGTTTCCCTAAATGTCTGCATATCTGTCCACAGCAAGTCAAGCAATACAGAGGTTTATTAAAAAACTTC…
CUFF.1383.1	chr1:106606695-106609553	+	gctggaagttaaggagtaaaatgacatggggagaccaagcgttgGCAACTCCACAGAGAAAATTGAGAATGTTATGTTTCCTTGATCAGAAATGGAACCGTGCTTTCAAGACTTTGAAGAGGATTTGAGAAGCATGGAGCCCATTACAGCCTGAGTCATCTCTCTACCTCTCACAGCAAAATTACcatcctgcttttaaagatgcttaaagagaatgatttcaaaatctcttctaataaaccttctctaatgatcagtagaattcactgcctagaaatgtcctgatgacatccagagctctcctactccaTATGTGGTTTGTTTCTTTTAACCCAGGGGACAGCTGAACAGGCGTTTTGAGTGACAAAAAAAACGGCTCTTGAAGGCCAATGTTGATTT…
CUFF.1386.1	chr1:106661885-106684092	-	gagggggaggggaaatttgctctctgcctgagctgagtgccccagacatcagtgctcctggttgtggggccttacaacttggaccaggacttacaaggttgtgcctccctgcaccctgccaccttcttgggcttttggactgctgatgggacttatgtcattgactcctctggttctgaagctttcagacttgtactgaactaaagcattggctttccttgttctccggcttgtggatggcagttcatgggacactgtgacttccataatcacTCTCAGGAGCTGTACTTGGCTACTCTCATTGAACAAATGAAGACTCCAACCTTCAACCAGGAGGGTGCTGGGCTTATGGGCGGGGGGCAGCCAGATTGGGGGCCCCGGGCTGGGATGGTGACCCCT…
CUFF.1387.1	chr1:106798173-106804083	-	CGAGTGCATCATGAGGATTCTGTAGACTCTGGATACCAAGGACCCTGGCAGCAGTGGCGGCCTGAGGGAAGGGAACTGTGGAAACTGGGAGGCGCAGACACAGACTTCCTTTATTTTCACTGCAAAGCTTTTGTGCATCTGAGCTCCCCCATCCTGACCTATGGATCATTTCATCAGATTACAGAGACAAAGCTGCCATACAAAAATATCTACCCAAAGAAAACTTTGTCATTGAAAAAAATGCTTCCAGTGGCTTCTTTCTTTGGAGCAACATCAAAATGTTTATGTATTTAGTTAAAACCCATTTTTAGACTTTTGGTCATGAGCTCTCATGTTTTTTATTTCCCATTGCGTGATTTCTGAAATCCCATCTGGTCAATA
CUFF.1490.2	chr1:112816329-112818371	+	CTGAGGCCTGGCAGGGAGGGGGCTCCGGAGTGAGTGTGAGGATTTGAATGAGAAAGCAGGTTGTGGCGGCGGCGACCCATTCTGTCCTGCCGGTCTCTGGGGATCTACAGGCTGGTGTGCAGACGAGTCCTTCTGGGGGGCTTTTCTGCTCCTCCACAGGGTTTTGGAGTTGGAGTCACAGGGACCAATAACTCATCAAGCCAGCACTTCGGAGGACTCAGAGGAATCCATCTCTCGAGCACTCAAAGTTGAGCAGTTCCGGCCGGGACACGCTCTTTAGGACAGTGTGAGGTGTGCGAGTGGGGATCCCTCAAACCCCCTGGCGGAGAACTGGACCACAACTGGTCTTGAGGTCCCGTAATTTCGAAGGATGGGTGTGTGAGCCTGCGCCAGGATTTA…
CUFF.1502.1	chr1:113175675-113321891	-	cagagtgagtgatgctggaagcggagatcgagttttgctttgaaaatggcgggagctgcaggccgtggaatagaagttgtgtatagaagctgaaaaagccaaggaaacagattgtcctctagaatatccaATGGAATCAGAccatcttggactctcacatctaaaactGAATGGTCCAGACCTACAAGAGGTGAGGACTCCGCAGCTTCTGAGTGAAGAGCTGTCAGGGAGTGACAAGACGCAGCAACTCTTCAACCTCACGCAGAACCAGCTTGGGACAGGTTCCCCAACATTGGACCATAGGAAGTGATCCTGTGGTTAAACCCCAT
CUFF.1502.2	chr1:113250949-113321891	-	cagagtgagtgatgctggaagcggagatcgagttttgctttgaaaatggcgggagctgcaggccgtggaatagaagttgtgtatagaagctgaaaaagccaaggaaacagattgtcctctagaatatccaATGGAATCAGAccatcttggactctcacatctaaaactGACCTGGGGGCAGGCTACTGTCagaaaaattctccaaactcggaaagaaagcaaagaagtggaggcagattctttcagtatcacgggggacaaaggatcacccaaggagtgtcaagacctgtacttagttcatctcatttttactattgattaaagtttc
CUFF.1502.3	chr1:113268291-113321891	-	cagagtgagtgatgctggaagcggagatcgagttttgctttgaaaatggcgggagctgcaggccgtggaatagaagttgtgtatagaagctgaaaaagccaaggaaacagattgtcctctagaatatccaATGGAATCAGAccatcttggactctcacatctaaaactttaggtgaccttgggcaatcctgagcttgaacttcccggtttgtaaaatacagagagtgaaactcatgatatccacctccaggaattgttctaagaatcaaatgacattgaaaatggaaaacctcacctcaaaattcattcagaattgcaagggaccttgagtaatcaaaacaatcttgaagaggaaaacaatgttggagaactcacatttaactgatctcaaaacttact…
CUFF.1502.4	chr1:113268291-113321891	-	cagagtgagtgatgctggaagcggagatcgagttttgctttgaaaatggcgggagctgcaggccgtggaatagaagttgtgtatagaagctgaaaaagccaaggaaacagattgtcctctagaatatccaATGGAATCAGAccatcttggactctcacatctaaaactaaatggaaaacctcacctcaaaattcattcagaattgcaagggaccttgagtaatcaaaacaatcttgaagaggaaaacaatgttggagaactcacatttaactgatctcaaaacttactagaaagttacaatcatcaagaatgtgtggtacaggtataaggacagacatgtaggtcaatggaatagaattaagagttcacccaaatacttacagttagttgattttcagc…
CUFF.1553.1	chr1:116394644-116429422	-	TCGGCGATAAGAGGCTGCACAGCGACATGCAACAGTCTTTTCACTGCAGCTGAATGAGTTGTGGCGCTCACAATGCTCCCGTGACCGGGAACTGACAAGTTCAATTTTAAATCGCGGGCCTCTTGGAATCATGACTCCCACAATGCCTTGGGCACTCGCTCGGCAGTCTGGCTGCCTCTGAGGGGGAAAAAAATGTGAGAGGTTGGTACTAAGAAGTGCCTTTCCTGACGTCTCTGCTGCTTGGAACCGCTTCTAGAGCAGTCTCTGCTTTTGCCTTGCTTGCTGCCAGCTAGACTGTGACGACAGCACATCCACCCTCCACCTCTAGCCCAGACACCCCCATTTCTACTTATAATCAAGAAAAAAGCTCTAAGTATCTGGCATTGCCCTAGGCTGCTT…
CUFF.1587.1	chr1:118237665-118241316	-	cggggccacggcagtgaaaacctggaattctaagcactaggcaagcggggaactcccctgaccatggattttaatcatactggcaaactatcttcaaagtactacccgtactagtgtttgattgagcaactggagatcgtagcctagcgaaactgacacataaaactgaccatcacaAGTatgatggtattatgggtatgtgcaaaaacatctttgttctcagaagatacagcttgaaaaagttaaggacccatgtgattaccttggacctacctgcattacccaagataatctcaccgtctcaggatccttcactgaactacatctgcaaaatcaaagagatcta
CUFF.1610.1	chr1:118803095-118808802	-	gacctgggtttgatccctaggtggggaagatcctctggagaagggaatgacaacccactgcagtatcccgtgctacagtccatagtgtcgcacagagttggacatgaccaaagtgacttagcacgcaGAGTGTCGCTGGAGGCAACAGGAAAAAACATCCTTGCAGCACCCTCATCAGCCAGGAACGCTGCCGTGATCTCAATCAGACAGAAAACCACCTCCCCCACCGCATTCCCAGGGATTGCTGAAACGAAAGATAAGAGTGGATCAGCGTATAGAAGATGGAGCCCCATTGACTGGAGGAGACCAATAGACTAAGCATTGATGAAAGACGATAAGAAGAGGGGCTCTAGAACACCCTCGGAACAGCTATAAGTGACACAAGTTACCAAAAGTGGG…
CUFF.1617.1	chr1:118991705-119073289	+	TAGGGGCAGTTTCTCGAGATAGCCTGTGCTGAGGATTCTGTGAGGCACCATGTGCTGGTGTGTGTTGGTGTGCTGGTGAACATGAGCACTAGGAAGTGCTGAGGCCATCACAGCGGTGGATCCTGAGgcctcaaacattttgtgggacattacaaaactcatgtcctctgtgcccatggaacttcatgactcaaacaaccgtgACGGAGGCGCCAGGCTCACTGGCACTGTGATGCAAGAGGAAGGACAGAGCAAAAGAGGATAAGTGAGGAAGAGGAGAACAGGGCAACCCTCTTAAACCCTGCTCATTGCACTTAGCTCACTGATGGTAACTGCCCAACTACTACTCTACAAGGACTCAAGGATACTCTCTTCCCAAAGCAAGTTTTTGGTTTTTTA…
CUFF.1666.1	chr1:121907177-121907991	+	AGAGCGGGGGAAATCAATTGAAAAAAAAAAATAAAGATACATGCGGGATTAAATAAACTAAGAAGCTCAGCCAGCGGAACTCCAGATCTTGGTTTTGAAACCGAGTCTATCTACCTTTGGCCATCTGGCTGTTTTAAGCTCTGCCCCATGCTGTATGATTTTAGCTGAAAATCTCTTCCGTTGCAGCTTCGCTTTTATTGAATTCATCAAAAGCAAACTTTCCCTGAGGTTTTTTTTTTTTTTTTTTAAGAAGGCTAAAATAATACGCCGACCACTGTGACATTCTCCGCGCCCAGGCCATTTTTCATAACGCCGCGGATCGGCTTTTGTGCCTCTGAGGCGACTAAACAGATGAATAACGAGCAAAGTCTCCCGAAACTAGTTTGAAAGTTGGTTTCT…
CUFF.1670.1	chr1:122283426-122357306	-	GAGAGTTGAGGAATTGAAGGATGCTTTGGAAATGAAAGGGTTAGGGAGTAGATGGCTTTCAGCCATGGAAGCATTGTTAGAGGAGTGCGGTTATTGTTGATTCGCTGTCCTTCAAATGTGTGTGATTGTCATCCATCATCTGACTTCACAGAGGTgatgtacaacaccaagactgaacctcaggacaaactctgggcaattatgatgtctcactgtaggttcaccagttataactaacgtaccactctgCCAAACAGTCCTAAGGAGAATAAAATGAGGTGCCGGAAGAGCTCATCCTTGATCCCATCTGGAGAGCTAGTACAAAGACAGACTTAGAAGAAAGGGGAC
CUFF.1670.2	chr1:122335849-122357308	-	TGGAGAGTTGAGGAATTGAAGGATGCTTTGGAAATGAAAGGGTTAGGGAGTAGATGGCTTTCAGCCATGGAAGCATTGTTAGAGGAGTGCGGTTATTGTTGATTCGCTGTCCTTCAAATGTGTGTGATTGTCATCCATCATCTGACTTCACAGAGGTTTATGTGCTTAATGATGCAAATGATGAAGCATTTTCCTGAGTCTGGGGAGAGATTTCAGCATTttgcattcatctcacacgctagcaaagtaatgttaaaattctccaagccaggcttcaacagtacgtgagccatgaacttccagatgttcaagctggatttagaaaggcagaggaaccag
CUFF.1670.4	chr1:122356336-122357306	-	GAGAGTTGAGGAATTGAAGGATGCTTTGGAAATGAAAGGGTTAGGGAGTAGATGGCTTTCAGCCATGGAAGCATTGTTAGAGGAGTGCGGTTATTGTTGATTCGCTGTCCTTCAAATGTGTGTGATTGTCATCCATCATCTGACTTCACAGAGGTgagatgctaagacaaggaagacctgcaaatgttcacaggacagttgggaagcccaagaaataatcagacaactgccatagaatatactgagaactataatg
CUFF.1678.3	chr1:122626587-122676937	-	tttagaggctgggaaaagtgatttaagtgagtataggctccacttctgttttgggttcccttggagtctaaagtgtcacattattccggctactatgaatttgtgaaattgttagttttcttcttactcttgagtggtggctgtcttcttccagtgctctgaaaaagATAGAGAATCAGTGGCTCTTCTAAGGGGATCCTGTGTAGTGAAAACGATCACTggtgctcatttcgtctcttccactaaattactttgtgacacaggATTTTGCAGGTGCACACGTCCTGCTGCTATGCCAAATGCTTCATCCCACCAGGAGTTTTTACCTGGCCGGTGTCATGGCTGCCAAGCTGAGAGAAGGACACCATGTCGGACTGTCAGGAAGATGTGTGCTGTGTG…
CUFF.1678.4	chr1:122626587-122676937	-	tttagaggctgggaaaagtgatttaagtgagtataggctccacttctgttttgggttcccttggagtctaaagtgtcacattattccggctactatgaatttgtgaaattgttagttttcttcttactcttgagtggtggctgtcttcttccagtgctctgaaaaagATAGAGAATCAGTGGCTCTTCTAAGGGGATCCTGTGTAGTGAAAACGATCACTggtgctcatttcgtctcttccactaaattactttgtgacacaggATGTTGGGGAAGACGGCTTGTAACCATCTACCACTGGCCTTGTGGTCACCTTTGCCTTAAAGCAATCTCTGGGAGATTTTGCAGGTGCACACGTCCTGCTGCTATGCCAAATGCTTCATCCCACCAGGAGTTTTT…
CUFF.1678.1	chr1:122626587-122676987	-	GGCTagggggactcccagaggtctccacctctgtgccctggagctctgggtttagaggctgggaaaagtgatttaaATAGAGAATCAGTGGCTCTTCTAAGGGGATCCTGTGTAGTGAAAACGATCACTggtgctcatttcgtctcttccactaaattactttgtgacacaggATGTTGGGGAAGACGGCTTGTAACCATCTACCACTGGCCTTGTGGTCACCTTTGCCTTAAAGCAATCTCTGGGAGATTTTGCAGGTGCACACGTCCTGCTGCTATGCCAAATGCTTCATCCCACCAGGAGTTTTTACCTGGCCGGTGTCATGGCTGCCAAGCTGAGAGAAGGACACCATGTCGGACTGTCAGGAAGATGTGTGCTGTGTGGTTTCCACCCACCAAG…
CUFF.1678.2	chr1:122626587-122676987	-	GGCTagggggactcccagaggtctccacctctgtgccctggagctctgggtttagaggctgggaaaagtgatttaaATAGAGAATCAGTGGCTCTTCTAAGGGGATCCTGTGTAGTGAAAACGATCACTggtgctcatttcgtctcttccactaaattactttgtgacacaggATTTTGCAGGTGCACACGTCCTGCTGCTATGCCAAATGCTTCATCCCACCAGGAGTTTTTACCTGGCCGGTGTCATGGCTGCCAAGCTGAGAGAAGGACACCATGTCGGACTGTCAGGAAGATGTGTGCTGTGTGGTTTCCACCCACCAAGTCAGAGAAGCTACATATATGACGGCACAGAGGAGCCTGCCTAGTGACAAGGCAGTTCCTCTACTTCAGCTGACTC…
CUFF.1681.1	chr1:125885383-125895122	+	CGGGACGAGCGAGGTCTCTGAGAAGAGAAAAGGAGGAACTCACGGAAGGGGAAGCTGGAATGACTCACACCGAAAAGTAGCAACAGTGTAGGAAGGAGTTGGCGTATGTACTAGAAATGCCCCTTATCCAATTTCACCAAGTACAAGATTCTGAGGTTTGGGGTTCTTAGAGTCCTGTGGAGAGACAGTCTGTTTTCCTCATAAGCCTCACATTCTGTGACTCCTACCTCCCTGAATTTACTGATGATGTTCCTGCCATCTCTGCTGGATGATAATAACTGCAGCCCAATGCTCGCTCTTAAGCAAGCAAGCAAAAAGTTGGGAGAACCACAGCTGCCCTTTTCAGAGCAACAGCATCTTCTGGGTAGCTAATGCTTGGACTTCTAAGTAAAGATCCCT…
CUFF.1681.2	chr1:125885477-125895122	+	GGCGGGAAGGATGAGGTGCCCGCGCGTCCCTGACGCCTCACGCCCCGGAGTTGGCGTATGTACTAGAAATGCCCCTTATCCAATTTCACCAAGTACAAGATTCTGAGGTTTGGGGTTCTTAGAGTCCTGTGGAGAGACAGTCTGTTTTCCTCATAAGCCTCACATTCTGTGACTCCTACCTCCCTGAATTTACTGATGATGTTCCTGCCATCTCTGCTGGATGATAATAACTGCAGCCCAATGCTCGCTCTTAAGCAAGCAAGCAAAAAGTTGGGAGAACCACAGCTGCCCTTTTCAGAGCAACAGCATCTTCTGGGTAGCTAATGCTTGGACTTCTAAGTAAAGATCCCTTCATGGAAACCACATGTATAGGTAAAATATCTGAGTAGTCTCCAGCCT…
CUFF.1709.1	chr1:127448872-127450467	+	GTGGGGGTAGGGGGGATGGCTATAccacccgacattccagatcttagttccccgaccagggatcaagctgcactccctgcactggatacttgacgtcttaaccactggacctccagtgaggccccTAGAAGGTACTGTTTGAAATGAGTTTACAAGGAGACCCCTCCACACCCCGCTCCGGAAAAGGCACCCAAACCAGAAACCACAGATCTCACTCCAGTCCTATTGATCCTCTGCAGCAAAAGGCCAAAGGCAAATAAACCAGTCACACAAGCAAAAGAGGCTGGATCAAAGAGCCTCACCACTAGGCATCCAAAGTTTGAGAGAGGAAAATAGAAAAGTTAACAAAATGCCTAACTTCATGCAAAGAATCATAATGCCGTTCTCCAGCTTACTGTG…
CUFF.1750.1	chr1:129803110-129804058	-	AGTTTTTGATGGCCTCAATACGTTATATAGTGTGGACGCTTTATGCATTCTTCAGTAGAAAAAACTGTCTTCACCTCATTGTATCTGGATCTTCGTTGAGGATCCTGTTAAATGTTGACTTCTTGCCGTAATTAAGTTGCCTGTTCTATGCCAGCCAGTGATTGTCAATGAAAGAAAGAGGGATTTGTTTAAATTTTAGAGAAGAGGGCATTTGAGAATTGGTAAATTAAATTCTAAACTCTCTCTGAGTCATAGGTTAGGATGGAGGTATAGGCGTGATTCTGTTACTGCCTTCAAGGACCTGGTCACGTCTTGATAGGGAGGCATGTTAGAGCTGGGTTGGAGGTAAGTGACACTGCTGGAGCCATCGAGGCTGTGGAGTTGGGCCAGAGTCACGAG…
CUFF.2049.1	chr1:147852571-147856149	-	GGCGATCCCTCAGGCTCCTCGGCGGGCGAGCAGCGGGCACTGGTGTGGAGTCCGCGAGGATGGTGGGGCGCAGCTGAGATGGAGGACGTTGAGGCTTCCGGGCGCGCTGGGCCTCCTCTTGAGGAATGCGTCCACATGCTTTCCTCCCAGCACGGGCCTCACTCATGAGGCTTTTCACAACTCTCAGGAGCCAGCTGGACACCCCGGGCCCCTTTGGACGTCCTTCATAGACCCGTTATGACGTGTATTAGTCCAAGTGCTTTTCAAAACAGCCTTGGAAGGAGCTCCAGCAGCAATTTCAGACGgaaaaaaggatcaggaccatttcacattcacatggaacacagatgcagttttgcccgaaggctatgttacctctcttgccctcttgtagtccaa…
CUFF.2160.1	chr1:153866552-153875412	+	ggtgtttgactttactccctcccctttcagtataaaagaagccagaattctaattcaggcaagacagttctttgggacgtgaggccacagtcttctctgtctgccagctatccaaataaagttgctattcctcgccccaacagctcatctgtcaatttatgggcctgtcaagagGTAAATTTTGAAAATATACAGCATCCACGAGTCtggcagactgcattttccaaagatggccacaaggaaacctccacactcctctgctctgtggcccttcacccccacatcaagaggaggagtctaatcccccaaccccgtctggaatctggtctggatttagtgacaccctcgcagccaacagaacgtggcCAGCAAGCTTCAGCCCCGGCTGCTGCATGGCCC…
CUFF.2198.2	chr1:156757583-156767394	+	AGCGTTTATATCCAGGAACGTTCCTACTAGGAGTGTGAGTGAAGGCCTGTTTAGATCCAGGTGGGCCAGAAGCTGAGGTGGAAGGTGCCTAGATTCTTATCCCTGCACAGGACAATAAAACAGCGGATGATCCGGTAACAGTGACAAGAACAAAATCCCACCTACAACTTAAAAAACATGAAGTGAATattcttttccattatgtgcataatgaggtattaaatacatttccctgtgctataaggtaggAACACAGATGGCTTTTTTCTGACACTGACTTGAAAAGCATCCCTGAAGCAACCAGACAGAGCCGTTGTGAGATTCAGGTTCTGCTGGAAGTCCAGCACGATGACTGGGGAAgtttcagctagctgtggtggtagaatggccctccc
CUFF.2198.1	chr1:156757583-156768619	+	AGCGTTTATATCCAGGAACGTTCCTACTAGGAGTGTGAGTGAAGGCCTGTTTAGATCCAGGTGGGCCAGAAGCTGAGGTGGAAGGTGCCTAGATTCTTATCCCTGCACAGGACAATAAAACAGCGGATGATCCGGTAACAGTGACAAGAACAAAATCCCACCTACAACTTAAAAAACATGAAGTGAATgtcagtctggatttatccacatggcagcagcaaggttccaatagagtggaagcatggaaggtctcttaagctccggagtgaactggatcgttgtcactttgacctcatcataccgacaaaatcaagcccagattccagaggaagggaaatagacaatcctcctggtgggaggagctaccaactcatcttggatgcaggagggaaagaatgg…
CUFF.2227.1	chr10:1407167-1443744	-	cccgtctccctgtctccagccctgtgactgtccatcactgtctacactgcagccagagcatccttctgaagcactacatctatcttcatcactttccactccccagatactaaaacccccaccaggtgagaaaagttaactgtatgctgaccatcagccgatagaccccagagtggttggaacctggagactgaggatgttgagttccagttaccttaccatcaaccaatcagaaggatatccacaagctcatcacataccacacaacccctct
CUFF.2242.2	chr10:2497774-2507102	+	tgacaagacagaggaaagtgattttaggcttccaaggactgcagactgggaagAGAGGAAGTCATGAGAATCCTGGTGCTGTGTCCTTTATTCTCCTCACCCTGGAAGAATCCACGATGTCACATGGATCGGTTTGCTTTGAATCCCGTCTGTTTAATTGTGCATTTCTATAGAGATGAAGTCTGACTAAGATGAGCATCAAGAGTCATGTAGATGGGAAAAAGACATCACCAAAAAGTAAAACACGTCCTGAATGGCACTCCAGGCTGGCTACATCACCTAGTCCTCTAGGTAAAGGGAGTGATGAGTGGTAATTGTGCTTCCTTCTATTTGTTTATATATATCTGTATGTGTTTATACTTGTGGGCACAAATATGAATGTGTAATCACACGTACAAA…
CUFF.2242.1	chr10:2497774-2579018	+	tgacaagacagaggaaagtgattttaggcttccaaggactgcagactgggaagAGAGGAAGTCATGAGAATCCTGGTGCTGTGTCCTTTATTCTCCTCACCCTGGAAGAATCCACGATGTCACATGGATCGGTTTGCTTTGAATCCCGTCTGTTTAATTGTGatgtctgtagcCcactggttcaatgaacatgagtttgagaaagctctgggagatggagaaggacagggaacctggcgtgctgaagtccatggagttgcaagagtcagaacgattctgtgattaGTTAATAcctactgatgaagcttaatttcttttcagttttctactattacaaatatgtcaatattctttcactattttctaagtatttttatgggataaatcctagaactggaa…
CUFF.2261.1	chr10:4253169-4257950	+	GCTGAGGTGGCCGTGATGGCGGCAGAGTGACTGCTGAAGGACAGGAGGTGCCACGGCCAAGAGAGTCTCTGGTGACAACAGCTGAGGCAGAGGGGTGACACGGACCTGCTCACTGCGACTGAAGAGCACTCTGGCTCTTAGTGACATGAGGGAATTACGCTTCTCTGGTTATGAAAAAAGGTTCCCATCATCTTCCTCCTTCCTGCCCCACAGGAAGGGGACAGGGAAAGACCCACGCCGTGGAGGTGAGGAGTAAGAACCAGGACAGGAGACTTCTGAGTGAGCTGATGCTGATACTGATCAAACATGAAAATGGgggaattccctggcggtccagtggtgaggacttgatgctttcactgtggtggcccaggttcaatccctggcgagggaactaat…
CUFF.2293.2	chr10:6411288-6417613	-	CAGCAGCAGATATTGGGTGGTCAGTTGGATGAATCCCTGGCCAGATAGAAAAGTGCGATGGTTACAGGATGGTGGGGCTCTGGCTTCCAAGCCTTTTCATTGCCTGTGCTTCTTGCCTCTCCTCCATGTCACTCTCTCTTCATTTCCCCTTACCAATCCATCCACTTCTCAAATCTTCATCTcaaaaagagaaaagttgacctgaaaatcaacacctcttcctagatccctcagaaaactgaggtcacaaggcaaccatcaccctgaaagttggagggacgaggaaatacagagaatctcaacctagcagaagcacaagtccacagctggagccagtagcggtgggaacattgcaaacttctgaatcctgccggaagtcggaaatcaagatgtcagcgg…
CUFF.2309.1	chr10:7203676-7204330	-	AGGTAAGTTTCTGGACTTGATCTCAAATATTAAGAAATGCCCATGGAATGGAATCTGGGAATGGAATGCTCTCAGGCAAGAAACAACTAcagctgtccctctgtatccacagggattggttccaggacctcccagggataccaaaatccatggacgttcaagtcccttgcataaaacagcaaagaatttgcatatgacctacacacatcctcccatttactttaaatcatctctagattacttaaaaatacccaataaatgctatgtgaatagctgccagcaagtggcaattcaagctttgctttttggaattttctggaaaaaaaattttttttcagaatatctttcattcactgttggttgaatccatggatgcagaacccacagataagaaaggtg…
CUFF.2345.1	chr10:8328745-8349327	+	tctgaggaccaccatccaatagttaagtgtAAACTGTGGGTGGAAGACAGGCCGAAGAGCCAGAAATGTACGGTAAAGGCTGATTTATGGGTTTCTCCTTTGCCAGGCTAAAAAGCGAGGACTTTATCAAGCGATCATGGGGTGGATTTTCAGCAGGGTAGTGACATAGGGTTGTGGTTTCTTGATCTGGGCAGACTGTGGACGTTTGATTTTGATACcttttataataatttaggcttgagataaagagggcctggattaaagtagtggcaatagagaggagggaaTACATTATTATTTTTTAAATTAGGAAGTGATTTAATGTTTGGATGAGGTAGAGGTAGGAGATGGAACAAACTGGAACGATGCCTGGGTTTTGGCTTAGTTTTGGCAGAACAT…
CUFF.2375.1	chr10:9776642-9783118	-	CTAGTCCCCAGATTCCTTCCCTTCCCTGTGTCCTGTGCCTTTAAGGATCATTTGCAGGGAGTCCTGTTCTGACTATTTAGGGCTGAGGAGCCTCAGGTGAGTAACACCCAAAACTAGAGTCAGAAGGTTGGCTCGGCACAGCGCTGGGATGTGTGGAAGTCAGagaagcatgtgaagagacaggtacagcagttcagcaagagctatgagaatcagaggGAAAACCGCCTTCCCCCACGCAGGTCTCTGTGGCTGGTGACCATCTTCCCAGTGAACACACAGACAGAACTCACAGCACAGTGCCCAGGCGAGGAGAGGAGACCAATAGGTTGTGGTGTGCTTATAAAAAGGACTGGTGATTGCATCCCTCTTTTCTCTGTGTCGCCAAGAGTGGGGAAT…
CUFF.2375.2	chr10:9780284-9783118	-	CTAGTCCCCAGATTCCTTCCCTTCCCTGTGTCCTGTGCCTTTAAGGATCATTTGCAGGGAGTCCTGTTCTGACTATTTAGGGCTGAGGAGCCTCAGGTGAGTAACACCCAAAACTAGAGTCAGAAGGTTGGCTCGGCACAGCGCTGGGATGTGTGGAAGTCAGagaagcatgtgaagagacaggtacagcagttcagcaagagctatgagaatcagaggGAAAACCGCCTTCCCCCACGCAGGTCTCTGTGGCTGGTGACCATCTTCCCAGTGAACACACAGACAGAACTCACAGCACAGTGCCCAGGCGAGGAGAGGAGACCAATAGGATGACCCTGCAGTCCCTGACTTCAAAGCACGGCCCCCGTCCCCACCCCTCCC
CUFF.2410.1	chr10:10763984-10766535	+	CCCACCAGCTTTGACAACGGTACAGAGGTGACACTGATGATGAAGATGAGAAGGAGGAAGATGTGATCTGAGTGTCTGACCAAGTAACATCATGCATTGATTTGATGTCAGAATGAAGTCTCACCAGGACCGCCTTCTGAAATGGAACTTCCAGAAACAGCAGACAGACTGCTGATCAGCCATCCCAGAAAAAGAAAAGCCACCCATAGACCAGCCAGGGCTCTGATCACACAGATGAATGCTACGTTTCCAAAGAAACCGAAATCAGCATGAAAAATTTCTCTTGCAGAAAGATTCGAGCTCATAGTATACCTGGTTGCCTGATGAAAAGGAATCATTCCCCCTCCCCGCAAACTATGTGATTTTCATAATGACCCGAGGTTGTGGACTGTGGATACA…
CUFF.2513.2	chr10:13440440-13451037	+	TGCAGGCTGGGAAGATCCAGGGGAGGACATGGAATTGGATTCTCACCTGGGGAAGCTCTGatgcttgtaagagttgtcacatactgcataggaccgctgtgaagcttaaaccagtcaacccacgtgaagcactttgagcagtgcacgctcacaggaagagcacaTCAGCACAAGCCGTTTGCTTTCCGGTTCCCCGGGGAAGATGTAGGCCAACGTAGGTCCCCCTCCCTGCCCTCACCAAAGTCTTGCTTCCCCTAATTTTCTGAGCCGGCAGAACACAGCAATGTGATGACGTCGCCAGTGGGTGCCCTCGGCTGAGGGATGGTCCTCTCCCCATTGCCTTCTCCCTGGGCG
CUFF.2513.1	chr10:13440440-13451742	+	TGCAGGCTGGGAAGATCCAGGGGAGGACATGGAATTGGATTCTCACCTGGGGAAGCTCTGGAGCCTGTGTGGTATGGATGCTTTTCTCCGCCGTGTCACCTGGGAATAACCATTTACCCTCTCTGGAGAAACAGCTGGACTTCAGGACAGTGACAGCTCCTTCCAGGGCCAGGTGGAGGGTTCTGAGATGCAGCCTGGAACGGGGTGGCTTGGCAGATGGGAAGTTGTGAGtgttatgggcttaactgtgctcaacacccccattcatatattgaagtcctaacccctagtgcctcagaatatgactgcattggagatagggcctcctaaaaggtaactagggggacttccctggtggcccagtagctgactctgtgctgccaatgcaggtgcccaggt…
CUFF.2606.1	chr10:16818632-16819431	-	CCGTGTCAAGTTGCAGAGCGACCTGGGAGCTCTCCAAGgtgctgctacttccagtgcaaattacggaggaggaaaacagagcaaaggttaaggagcttaagagagtgagccaggctggatttctcccctgcaggttgactacagaacacacacttttaaaccacagcgttctactCCCGCTATGGAGCACTGGGGAGCTCGGGAAACTGCTGTTCTGATTGGCTATGAAATCCACGGAGATGCttataagatcagaatattagagctgggataagcctcatgagtcattcagtccactcccttcatcataactgatgaaggacaggcccagcgaggataactgtctggtgaaggtcaacaacTTTTGGCCCCACCAGACAAAAGGAATTGAGCTTCCTG…
CUFF.2610.1	chr10:17186180-17187990	-	ATCTTGGTTTGGTCTCCACGAAATAACGAGACCGCTCATTCCTGCAGACAGAGGCGGCGCTTGGCAGGAAGGTTCTGATTAGGAGTCACGGACCTGCATAGAACAGCATGGCAGAAGCTGAGTTCTCCTGCGAGatggaaatgaaagcatggagaagggaagCCAAGTCCAGGCCAGTGTGAGAAAGGACACACGTGTGACCAAGTGGGGCATGTTCACGGATGGAGCCCTCTGAAAGATGGCCACCTCCGATATGTGCTTTCAGGGGGATGTCAATGCAGTAGACGAGACAGAATGTGAAGAACAAGAGACCATGATAAAACTCATGCTGTGACCTGCACAGAAGAATAAGACTCCCCTCTGACTCTCCACTAACCTGGGATCTTAGCATCTCGCTAC…
CUFF.2676.1	chr10:19410076-19413236	+	CTTGGGGGCGCGCGCGGTTTTGAGGCACTGAGGGAGGTTGGACAAAGGCCATAATGCTTGTCCAGGCGCTGTACCTTTTCCCAGAACTCCATTCGTACCCAAAAATAGAGAGGCAAGGATCCGTTTGTTTTCCCAGTAGGATGAACCAGACCGATTTTGAAGAAGCGGGTAAACCTCGTGTCAGTCTTTGAGCCGctgccacttctgaggtgccgggagccaaaccagagtactgcatgtgatccctgcaaacagcaccacgaagagggtgggcaaaccacctgagccaaccttccaaccagacccaccaa
CUFF.2875.1	chr10:29606157-29615293	-	GTTAGAGGGGCTGTTTGAAGCACTGCAGTAGATAGCAGGGGGATTTCGCATAGTGAAGCCTGGCAGAGCACTGCCTGACATGGAAGGAGAAGCCTGGGGAGGCCTCCAGTTCTGGCCTCAGTTTGGCCTCATAACTCCATTTTCAAGACGTGGAAAATGAACTTAAAGAAGATGCTGTATCCTATGGTTGTACTTGAGCTTCGTGAACTGCCTGACCACAGCCCCACTGAGCAGGATGATAGGATTCCTGGCAGACTCCAGGCTGTCTGGCCACCACCGAAGACAAAGGACA
CUFF.2894.2	chr10:29964663-29968751	+	GTAGTTGGGGTATGTTAAGTAGTTGGGGTATGGTGAGTAGTTAGCAGCTGGGGCATGTCTGGCTGTTCTTAGCCCAGCCCTGCCTGCACAAGAGGGACAGTGGCCAGTATTTCTACCCTGTGTTTAACCAGACATATTTGACTCACTAATCAGACTCAGAGAAACTTAACTTAAAACAACATCATCTCTGCCTAGTTAAGATTCATTAAAGCTGAGGGCACAGTGGATAGCAGTTCAGATTCTTGCATAACCTGCATAATCATCAAGCACACAAGTATATCATATATGACATAAAAGCATTATATAAACATGTTAGGTGAAAAACAGGCCTATGAAGTATTGAGGATCAAGTGAGGCAGAGGTGTGCTATATGGTTTTTTAACCCAAGAGGCAGTTTAT…
CUFF.2885.1	chr10:30015899-30017197	-	TGAGGTGAGGAGTAAGAAAACATCAAATGCTCATTTTCCGTGCCTTCTGAGACTGCAGCTTACCTATGCAGCATGGGAGCAGAGTCCCAGAGAATCCCCTTTGTGTAGCACATCCATCTGATTTTCCAGGCCGTCTTCAATCAATTCCTTGGATATCAGattctcatcactccatgaggtagggagctgaatgcaccttcggcagattgagagatcgacattctgaaaggtccagtgacttgcctgaagtcacagtgcagagatgtgacaagaacccagCCTTACAAATTAGCCTTGaagtgaagtggctcagttgtgtctgactct
CUFF.2887.1	chr10:30019701-30021400	-	CTGAGTTTCAAAGAGGAAGACCCTATAATGTCTCCCAGGCATACTACAAAGGAAATATAAGTCAGCAGACAGTTGGATCtggatctgggccaggataactcgactcttcttgtagaaggtgccatgggatctttagtgatggcagGATTCTGTTTATGAATGACAATCTTTCATCAGCAAAAAAAAAAAAAAAGGCGTACTCAGGACAAATGAACAAAAATTACAGAAGAGACTCGAGTCTCTTGGAGAAGATTATCGGCTAGGATTACTCCAAATCTCTTGATGATTCTCTTCTTTTTAACTTTTGGTTGGCCAAGAATCTTTCACCTGAAAGACTGGGATAGGGGAGAATAGATGAGAAGAGAAGACAAGATTTTGATTTGTTTTGGAAGTTTCCAG…
CUFF.2923.1	chr10:30686785-30714459	-	AAAGCCGGAGCTCCTTGGGAAGCTGAAAGGAGGGAAGGAAGCACACTGGTCTTCTCCACTGGAGTCATCAGCAACCTCAGCACCATCTTCAGCAAAGCTCCAATGAGatgaaacaaccacctctcccagtctcgaaggaatgaccatgtatagcagatgaagcttgacattcagccctgcctcaagtctcgattgtttctcaaacctttgtgtttgtccaagcagcctactacgtgttcagcgactcccagtaactgaggatgtgccagtacctgtcagtgcccCAAAGGAGAGGATCTCAGCACTATATTCAGGCTGACAAGAAGCCAGACCCTTAAACATCAGATTTTAATGGTTTTCAAATATATACAGATCTGTAGAACTGCAAGTTTTGTAAGT…
CUFF.2927.1	chr10:30720206-30732112	+	aggattggatagtcctgtgagtgaagcagggcctggtcaagcagggaatgcacagagagcaagagaacagtcaacttgagtgtcctgaccatacaGcaatgcacactagagaagaaggagacccaaatggTGGTGCAGGTTGGTTGTCTTCAGAGAGCCTTCTCCTTGCTTGTACGAACACAGTCATCAGATCTTCTGGAGTTCTGTTTAAATCAGGTGAAAAGGAAAACCACAGCAATATTTTTCTTTTGATAAGAATATATCAGATATACTTCAAAAACTCAACAGCCTATTACTTTTGAGATGATCTTAggggattctagtggctcagtggataggagtctgtttgccaattcaggaaacatgggttcgatccctgatctgggaagatcccacatg…
CUFF.2943.1	chr10:33301667-33359727	-	ATGGCTGGTGTTTCTGGGCACGTACTTTCTGGGGAAAAAACCCTCAGACACAGTGTCTAATAGCAGCATGTACCTGTCTGTCAACAAAGAAGTCCATGATATGAAATCGCCACTGTAGCAGGAGAAACAGGCAGCCGATACCATCACCTTTGGTGGCTAAGAAGCCAGTTGTAAAGCAGCAATTAAAGATTGGGATTTTATTTTCTGTGTCTAACCCCATCTTCCCATCCCTCCTGTACAGAATATATAACTACAATAAAACTCCCAAT
CUFF.2994.1	chr10:34660437-34661160	+	TTGTCCCCACAGCCGACTGGCTTCCTCAGGCCAGTGCGCCTAATGAGCTGGCTGTTGCCCGTAAATCAAGTCAAGCATACACAGTTCGGGCTTTCATCAGACGGGCTTGTCGTTAGTGGGAGGAAGCGTGCTGGGTTGCCAAGTACCAAGAGCGGACTGATGTGACTTGTGAGCCAAGGAAAAGAAacacacacacacacacacacacCCCCTCCCAAAGAGCCCAGCTGGAGGCATGAGGAAAACAGAAGGCGTGAAAGGCTCACATCCCATCCTGTCACCCACGGATGTGCCATCACCAGGCAGTCAGCAGAGATGTGGCACGTGTGGCTTCAGTGGGATCTGTCATGAGGACCTCCAGCAGTGCTGTGGACAGCTTGATCACCAGCTTGTGGGGCC…
CUFF.3022.1	chr10:36055724-36057420	-	GGAGCCCGGCGGGGAGGGGCGGTCGGAGCGCGGAGCTGTCAACTCTGGCGCCTCCCCTCTGTGTTCAGACTGCCCGAAGTGACAGCTTCTTAGTTTCAAGACACCATGCCCCCTTACGAAGAAGTCCCACCTCAACGCTGCTTCCCTGCCTCCTCAGCAGCACGGAAGTCAAGTGGCTGCCAGAGTTGAGTGTGCTGTTGAGTGTCTGGAACTGCAGCACCATAGCCAGGTGATTCCTGAAGCTCAGGTGCGAGTCTGCCACTAGCAATGGCCAGCCGGACTTATTTTCTGAGAAATTTTAAGGACATTGAACGTGTGGAGTGCTTATTGCCTTCTGCAGGCTGATGGGGAAAAGACAACCACTCCTTCCCCATTCTGCTCCCACGGTGGCCAGAGCCC…
CUFF.3143.1	chr10:38920990-38922632	+	GTTTATGCGAGAAGCAAACCAATTCACTCAAAACAGTTAGTAGATGTGTCTGTGTATATTAGCCAGTAAAAAGTGAAAAAGAAAGTTTCTTCCCCAAGAGCAGAACAATCACAGTTTGAGACCCTGTACTGCAGGACAGCAGGTCGTCGCTGAGATAGCAATTGATGACATATACATTGCTCTGAGGGCTCCTTAAGAACTTCTACCTTTTACGAATGTCAGGTGAAAGGTTCACAGCACAACTTTTCATGCTTAATTAGCAGTTAGAATCGCTTCAAGAAATCAAATAGGGAGGAGCAGATGGACTTGCAGCTCACCTTGCGGCAGTAATTTGTTTGTCTCAGCCACTAGTCTTGGTTGCTAACAACATCATCTAAAGAGCTATTTAATTTGCAACAT…
CUFF.3143.2	chr10:38920990-38922632	+	GTTTATGCGAGAAGCAAACCAATTCACTCAAAACAGTTAGTAGATGTGTCTGTGTATATTAGCCAGTAAAAAGTGAAAAAGAAAGTTTCTTCCCCAAGAGCAGAACAATCACAGTTTGAGACCCTGTACTGCAGGACAGCAGGTCGTCGCTGAGATAGCAATTGATGACATATACATTGCTCTGAGGGCTCCTTAAGAACTTCTACCTTTTACGAATGTCAGGTGAAAGGTTCACAGCACAACTTTTCATGCTTAATTAGCAGTTAGAATCGCTTCAAGAAATCAAATAGGGAGGAGCAGATGGACTTGCAGCTCACCTTGCGGCAGTAATTTGTTTGTCTCAGCCACTAGTCTTGGTTGCTAACAACATCATCTAAAGTTGGAGTGACAGAGAATgct…
CUFF.3190.2	chr10:41261619-41624275	+	GCTGTTGCCTCTTCTAAGTTCTGTTAAACTCAGTCTTGCCCCAGATCCCATAGGAACAGCATTTCCACTGCTTGTTCATCATTTGAAAAACCCTAGCCATAGAGAGATGGCAATCCACATTTCTGTTTGGTTACATTCTGGGGCCTCCCAACCTGATAGTTGAACCACCAGCGTGTCAGAGAATCAACAACCTATATGCTGCAGACAGACTGAAAAGCAAGTCAAGTTCTCGGGACACAAAACAGGACAAACAAGAAGACAACAGCTGGCACTTGAAGAGAAAAGGATAGAAAACCATTAAGAAACAATGTgaaattttaccttcccttcttgactgggcactagagagatccagaagagttgacattgAGTGAAAAGGTGATTCAGAAAGAGGATTGG…
CUFF.3172.1	chr10:42129105-42214673	-	AGGAGGAGGTTTGGTTTTCAGTGCAGTGGGAAGTCTACAAGATGAAATTTTGGACATCTTTTACAAAGTTGAACTTTTAGAATTAAAGCAGCAAGTCACGAGTGTCTGTCAGATTTGGACTTCAGAAATAGCCATGAAACTGCAGCAAAGTTCTGTTTAACATTGTGTTTATGGAGTAGctcttcttttcctggtttcaaagacttttttccatttgtatacagCAGCTACAAGATACTTGGAGAGGATCATAAAGAAGCAGGTGCTCCTTTTGGATGAAAACAAAGTGTGCCTTTTCCATCCCAGGAAGAAGGATGAAAGAGCTCAAACTTTCCTTTGACACACAGTGCTGCAAAAGTTTGAAAGATCATTTTGCCTTGCCATGTTGCTATGGTAACC…
CUFF.3174.1	chr10:42309599-42333615	-	ATGCAAGTGAGAAGAAAGCAGTGATTTATAGGCACTGGAGCAGAACAGGGGAGTCATGGAAAAAAAGCAATTAACGAATAAAGGAAAAAAGTACCAATAGTGAACAGGAAAAAAATCTTCTGAAAGCTAAAGAAGAGAGAATAATTGATGGTTACATTTTAGCTTAATGTTATTTCTGGATCTCTTTTATAATGTGTTATTTACTGCATAGTTTATAGTTGACAGAAAATAAACAGCAT
CUFF.3228.1	chr10:43701550-43702802	-	ACTCAAGGCAGTTCAGTTGGACATTCTATTCTGAATTAATCCAGACTAACAAAGGACACTTTCTTGATTCCAACGTAAGACAATAGGAGTGTAAGTCAAAGCCTTGCGGTTTAAATGAGGACCTGAGAGAAAAGTTAAAGCCAATTGCTTCATTCAGCCGAGAATGGACATTAAATCAAGCCTTTGTGTCAGGACTGTGGGAGTGGGAGGATGAGTGGTGGTGGTTGTTTAAAACCAAAAACAGAAATGAAGAACCCCAACACTGATTTTACTGCCCTCCGTAAAATCAAACTTCTTTAAGAAGTGTGAAACTGACTTAAATTCTCCTTATGTTCATTTTCATATATGCATAACTTTGTAGCTGAACTTCATGAATTATTCATTTGTGTTGTATAGAGC…
CUFF.3298.1	chr10:46155207-46216064	+	GGGAGAGCGTTGAAGGGCTTTTCGAACCACCTTGAGTGGGGCCCAGGAGGCCACCTGGCCTGggaaggaggcaggaaggggcaggcagatttggtttccagtgccaggacctctagcttttcatgaacctgagccagggacttccctttcctgggcttcagtttctgcatcttcagagaggagtttcagctggaGTAAGcatcggaccttgcttctaggggtggtggcagagaggagcaattccacatccaaggagcagtggctgcgtgggcacaggagggcctagaggaactactccatgttcaaggtcaggaggggtggcagtgaggagatacaccttgtccacggtaaggagcaatggtgtgctttgctggagcagttgtgaagagataccccaca…
CUFF.3325.2	chr10:46597468-46629089	-	AGGAGCAGAGCAGCGTTGTAATTGTCACCAGCAAGAAGAGGCAGATGGGGACCTACTGGAGTAACTGGTACCAGATCCCAGGAAGGCTGAGAGTCCCttaacatccccaggaatgggacagagtaacatcatatacctcctgatatgctactctgagatgaacccagcatcacctttggggtaccccagccaagactgtacagcataaatcatcataaggaaacatcagacaaacctgaaatgaggaactaagacattcatcccccaacccaggtggaaggtggcgactacacactgaggaaaagcacttagatcccagaccggttggaaccacaaggctgatgattgagactcctgaaatatcgccctgttacctcctcaccaccaaccaatcagaag…
CUFF.3325.1	chr10:46597468-46641108	-	CAGGTGGTTTCAAAGGTAATCGTTCACTGAGCACAAGCCGGAGCTCTGCTGAGGCCAAAGCTCTCAAGCAGATCAGAGCTGGTTCTCCAGGCGAATGGCAGCCAGGACCCAGGTCCTGAATTCTCCTGCCACTGGGACTGCCTCACATTGGCATCTATTTGAGGGGCTTTGCTAAATGCCCTGGCCCGCTTCTGCCACATGGAGTTGTGCCCTCAAAATATTCCTGGTTTCCGAGGCAAAGGTGCTCTCTATTGTTCCTGTTTTGTGTCCAGCATCTCCAGGCTGCACTGAAGCTCAAGCTGTGGCCTGGGGTTGAGGgaactaagacattcatcccccaacccaggtggaaggtggcgactacacactgaggaaaagcacttagatcccagaccggtt…
CUFF.3325.3	chr10:46597468-46641108	-	CAGGTGGTTTCAAAGGTAATCGTTCACTGAGCACAAGCCGGAGCTCTGCTGAGGCCAAAGCTCTCAAGCAGATCAGAGCTGGTTCTCCAGGCGAATGGCAGCCAGGACCCAGGTCCTGAATTCTCCTGCCACTGGGACTGCCTCACATTGGCATCTATTTGAGGGGCTTTGCTAAATGCCCTGGCCCGCTTCTGCCACATGGAGTTGTGCCCTCAAAATATTCCTGGTTTCCGAGGCAAAGGTGCTCTCTATTGTTCCTGTTTTGTGTCCAGCATCTCCAGGCTGCACTGAAGCTCAAGCTGTGGCCTGGGGTTGAGGGTACCAGATCCCAGGAAGGCTGAGAGTCCCttaacatccccaggaatgggacagagtaacatcatatacctcctgatatgc…
CUFF.3336.2	chr10:46929577-46943556	-	GTGTGAGGTGGGGCCCTAATGTAAACTTTTGTTACCACTGCCTCTAAGTATTTTTCGGAGAAGCTTAGGGAAATCCATATTGTCATCAAACTTTAACCAAGACAGCGTTATTTTTCTCTTCTTTCTTTTGTCCACCTGTGGGCAGGTTGCAAAGCACGTGTGGCTCATTCTCAACACATTCTTGAAAGCAGCAGTGACTTCTGAAACCCACCTCTTTTCTGCACATCAGTTCTCCAACAGAGACATAAGCACTGTCCTTAAAGCTCTGCTGTTGGGGTTGCAGTCCATCTGCCACTCATGAGGATGTTTGACACTTCAGAAACCAGTCCACCATCTGCAGCCAGCTGGATCCAGTGGATCTCGGTGCCGCCTGCCATCAGAAATCTGAACTGTGCAATG…
CUFF.3336.1	chr10:46929577-46944625	-	gtggaggagaaagacagagagaggtgtggtgctgaaagaagagtctgggagatgccatgttgttggctttgaagatggagtaagagggtggtgagtggaggatttccagctcctctaggagctggaaaaggactctcccctaagccttcCTTAGAATCAGCTAAATATTTGCCTAAGTTTTAATTCTTTTGTTGTAGCATTTATCTATAAGTTTTTAATTAACCTGGGAATTTGCAAGGGGGGGGTGGTGTGTGtggctgcatcacacagcttgcagaatcgcagttaacccctggtcaggagttgaacacggagcacagcagtgaaagcctggaatcctcaccactagaccactggggaactcccTAACTTGGAATTCCTTTTGGCACTTGGTTGCAA…
CUFF.3337.1	chr10:46943294-46945546	+	CTTTAAGGACAGTGCTTATGTCTCTGTTGGAGAACTGATGTGCAGAAAAGAGACATTACATATGCATCATGTTTTCGAAGAGAAATAAAAGCTGATCGAGAACGTCTACCTAGGACAATTTTCTGATCAAGTATTTTTTAGCTTTTGACAACACTCGCTCAATCTACAGGATGGTGCTCTTCATCAAAAATATTTCAAGTCTGGCCATCGGTGACACTCACTGTTTTTTCAAGTCCGAGCTGTCCACTCTGGAAAATGTGACCCACGGAGGATAGGAAGGAGCCACACAATGAACTAAGCAGCAAATAGGTGCTTCTTAAAAACCTTTTCAAGGCCAAGCAAACCCAAAGCACAGCCACACCCCGCGAAGAATTTAATAACCAGTAATTTGGAACCGGA…
CUFF.3344.1	chr10:47130445-47132636	+	AGAGACTTGGCTGGCAGGTAACACCAGGGCCTGATGTAGCAGCAGGCAGAGACTGAGCCAGAATTTGACCGTTGGTAAAGCAAGTCCCTGAGGAAGGTTTGGCTACAGGGAGTGCTGTTTCCTGCTGCTGACATCCGCAGGGAGAAGCTCTGGAGCCAGCAGTGCTCTTTTGGTTCTGCAGTTGAAGAAACCAAGCCAAGGAGGCCCAATAGGCAGACTTCAGCATGGAAACCAACCTCCATCCAGCTGATGAATGGGAGTCTACCATCTAATGCTCTGCAGCCACAGACCCAGCTATGGGTCCCTTTCTTATTACACAATTGACTTAAGGCCACAGGAATCTAGTGCAATAAATCATTCATGAAAATATGTAAATCAGATAACCAATAGGATGTCAGG…
CUFF.3365.1	chr10:47937132-47940734	+	AACGCGGGCCTGCTGAGGTGAAGAGCCACAGTACTCCGGGCAGTAAAAGAGCTGGGGTCTACTTAAGATAAAAGACTCTGATGCACCAGAGGCTTAGCCTTCACCTTTCTCCATGGGACTAACTTGCCAGAACAAGCTGTTCCTCAACAAGAGAACACATCATCTCCCAGAACTTTCAAAACTTCTTCCAGTTCTCACAGGAGCAAATGCCTGGAGTTTTCCCACTTTCCACGTCAGGAGGTTTACCTACTTTCAGAACATGCTGCTCTACAGACATCTGAAGCTACAAACATTGGAATACCTGGCTCCTAAGTTTAGAAACAGCACTGGCTGAAACTTGCTTC
CUFF.3379.1	chr10:48376483-48548607	+	ttgaggagTGAGCTTTTTGTGGACCAAGGAGAAGGGAAAGTTTATTTCCTTTCCTTTCATCTAGGAAGGTCTGGAATTTGAATCTCCAGATGCTATTGCAGGAGGAGTTCAACCTGCTGTGGAGCATCATCTCTACTCTATATGGGTTATAAGATATTCCTTATTCCCTCTGCCTCGCCTCGACCATCTCCATTAAAAGTCAGTGTCTTCTGTCTGTCTTCATCAGGTCTGTTCTCCTCTGCACCCAAG
CUFF.3383.1	chr10:48946891-48948888	+	CATGGTAGGGGGAGCCTGTGATTAAAAAGGAGGCAATAGGAAATGGTGGATTGAGTATTGAGACAAGAAAATCAAGCTACTACCACCTGAATATTTTCCACTCATCCAATTTGTACTGTTCCTTCATACTGGAGTTTGGGATCAAAGTAACACTGCTGCAGTTCTTTGCCACCCTTGGATTTCATTCAGCACCTACTATGTGCTGGGGAGTTTCAGTGAAAGCTGGGAGTGCAGAATGATGCCTACAATGATGTGACTTATTAAAAGCTGTTAATTATCTGAATTTTATCATCCAGATGTTATTAACGCCTCTCTAGTATATCTTTTATGGATGAGACTGTACATTTAATAGCAGTAGTACCATGGGAATTGACAATTAGCAGCTACGCATGAACTAGA…
CUFF.3383.2	chr10:48947466-48948888	+	TCAAAGGAGAATAACAAAGGAACCAATTAAAGGCCTAAGGGAATAAATTTCACCCAAAATGTTAATAAGCTGCTACTGGTAGCTAAAATGAGCCATAGATGTTTTTTAAGCTGCTTGCATCCCAAATAGAATCATTAGTGAAATGTAATAGGAAAAGTTTGTTTTTCTCTCAAATATTTGAAAATATTTGGGGCCATGGATGTGTTTTGACATACTTACTGTCCCAGAGGAACTTGTTCATTACACTACGCACTTTGATATATATATTTGATATATTTACTTAGAAAAGTCAAATGTGACAAGCTGGGTCAGGTGCATCAAGAACTTTATTAACAGACTAACACTAACCTGTTACAAAAGGTGTGAACGCTGCTCTGGAAATCTGTGCTTTGATGTATG…
CUFF.3413.1	chr10:49917781-49995237	+	GGCAGCGTTACTGGAAACTAAATTCTAGACGTTTAACTGGAAGAGCCAGTCTTGGTTATCTGTTTATTGGACCTGGAAAAGCTCTGTGTCTTCTTTAAGGAGAAGAGAGCTTTGAAGAAGCAAGATGCCCATGagtcctatgactacaagcacatgagttctgccagcaacctgagtgaccctggaagcagatgctttcccagccaagcttgcagaggagaacccaggcctggatcacagccttgaagaggccctgctaagctgtgtatggacataaccaatatgtgtcttaagctattagttggtggtcatttgttatgcTATGTACAAGATGTGTCACTGCTCTTACATAAAAGGTTGATTGTGGTGTTGGTATTCAAAATACATACTAAGAAATCA…
CUFF.3413.2	chr10:49939128-49995237	+	TTGGAGAGGCTTGAATGGTTGTGGAGAagcactcactgtgtttcagcatcatgctaagaagcatttgcatccgttcccccaactattccagttgcttccttatgaaTCTTGGTTATCTGTTTATTGGACCTGGAAAAGCTCTGTGTCTTCTTTAAGGAGAAGAGAGCTTTGAAGAAGCAAGATGCCCATGagtcctatgactacaagcacatgagttctgccagcaacctgagtgaccctggaagcagatgctttcccagccaagcttgcagaggagaacccaggcctggatcacagccttgaagaggccctgctaagctgtgtatggacataaccaatatgtgtcttaagctattagttggtggtcatttgttatgcTATGTACAAGATGTGTCACTG…
CUFF.3423.1	chr10:50002078-50279972	+	ATATcaggagtccttcttgtggaaattgctggaaaacacatttcaactaactacgactaggttaataccagcgaaaggactagagAATCTTGGTTTTTCCAGAGTTGTACTGATTCTTTAAGTATGAAGAAAATGGACACTATTCATAACCCTCTGAAGATATAAAGGTCGCAAGTGCTAAGGGTTCTCCTAGTGGAGTATAGACATGATGATTTCTGGGTGGGTTTCTCTGTTGCACAAGGTCTCTTGTTTAATCATTTTACACAGTGAAGTGTTAATCACCATTTAAGTTTGTCTTTGTCTTGTAACTTCATTAGTTGAATACACACCTCACTCTGGAAATATGGTGACCCCTTCAATAAAGTTTTA
CUFF.3434.1	chr10:50859345-50860730	-	tGGATGTGCTTTTCCAGTGCCATGAAGATCTTTGtgatggaagaaatgttcacccagtgagattgtcgattgagtatttgcatcgacGTTTGGAACTTCCAGGCTTGTGCTCACTGATAAGCCAACACCACCTCTATTAGCTGAGACTGTTTGAGTGTATCCCACATCATGCTGATCCTTGTATCTACCCAGAAGTCTGGACAAAGCAGTCCCTCTGTCCCTGCCCAGGTCTGCCAGCAGTTCCCTCAGCTGAGCACTCTAGAATCTAGCCAGGATCTGTCCAACAGCTGCTTGGTTGCTTCCCAAACCAGGTTGGACAGGGCTATATGCTGAGTTTTCTTAAGTACGAACCTGTGAATGAAAaatatcgcctgccatatcagaatgttgcagcgatca…
CUFF.3540.1	chr10:55094635-55095734	-	agggagggaggagtcattgaagaccatcagatgtctggctggctgtgctttgggattgtgttactcaagacacaggaggaggagtgggtgtgaagcagggtctacagagaagagctcaggagCCAACAATATCTTTTTAGAAGAGGACATGTGATTTACAAGTTGCCTAATTGTTGAAGTGTTGGAAACTCCAGTCTCTAAAGTTTTGGGAAAATCAACCAGGATTTATACTTTGTCAAGGT
CUFF.3545.1	chr10:55358869-55371908	+	TATCAGCGTGTACAATTAGCCATGAGTATATATGCATTGGGGATTGCTGGGAACAGTTTTTTTTCCCTCCCCCCAGAAGCAACGGTTACTGGCTGTGTTGGGATGTGTGGTGTCGAGGTGGCTGTAAGCCATCTTGTTACCAGCCTGAGAAGGAAGGCGTCCGTTAGAGCAGGAGTGGCAGAACTTTGGAGATGTGTAGCTGTGCCCTGGATGTGCCTTCACAGGAGTCTGCATTAtgaacttgtggctgggtggaagcctggtgggctgctgtctatggggtcgcgcagagtcggacacaattgaagtgacttagaagaagaagaagaagaagaatgtgaagcatcttttcatgtgtcttttcaccatttgtatgttgtctttggagaaaggtccatt…
CUFF.3545.4	chr10:55358869-55471040	+	TATCAGCGTGTACAATTAGCCATGAGTATATATGCATTGGGGATTGCTGGGAACAGTTTTTTTTCCCTCCCCCCAGAAGCAACGGTTACTGGCTGTGTTGGGATGTGTGGTGTCGAGGTGGCTGTAAGCCATCTTGTTACCAGCCTGAGAAGGAAGGCGTCCGTTAGAGCAGGAGTGGCAGAACTTTGGAGATGTGTAGCTGTGCCCTGGATGTGCCTTCACAGGAGTCTGCATTAtgaacttgtggctggCTGTTGAAAAGTCTtggacgtgaatttgagcaaactcctggagatagcagaggagcctggtgggctacagtccatggggttgcagagagtcagacacaacttagcagctgaacAACAATGACAACAAAATGGAGAAGTCTAGCTCATA…
CUFF.3577.1	chr10:56522269-56584666	-	agtggggtgtcaACAAGTCTCTGGAGTCCGACAAATCTAGCTGGCAACCGGCTGAAAAAGCGGCAGTTTTCAGCTGCAAGAGGCATAATTCCTGTCCCACGGTGATTCCAAAGGCACAGTCATAAATGACTAAGATGAAACAAACAAAGCGGTGGAAAGTCTTCAGCGTGGCTAAGCTAACATCAACTCAAAGACTGAAAGGCAGCACCCCCCTCCCAACATTTCCACTATGCATGCTTCTATTCCTTTTATATAAGTGACAAAACTACAAAGGTTCAAACAGTGTTGCAAGTTACTAGCTTCTCCTTATTAGTTTACCCTGTATTCATTTTAGAAAT
CUFF.3577.2	chr10:56525247-56584666	-	agtggggtgtcaACAAGTCTCTGGAGTCCGACAAATCTAGCTGGCAACCGGCTGAAAAAGCGGCAGTTTTCAGCTGCAAGAGGCATAATTCCTGTCCCACGGTGATTCCAAAGGCACAGTCATAAATGACTAAGATGAAACAAACAAAGCGGTGGAAAGTCTTCAGCGTGGCTAAGTAAACACCTCTCAGCCTGGTTGGATTAGTCACTCTTAGTTGTTTCCGTGAACATTTTAGGCCAAGACACATCCTAGAAGCTCTTCTTTCATAAGGCCCCTCTTCTTTCTCTCCTAAATGAGCCTGAAATACAGTTTTAAAGCTCAGGATCACTGTCCCTCAGATTTCTTTAAGTCTCACTGGCACCA
CUFF.3633.1	chr10:58562652-58569058	-	AATGACTTAGTTCGCAAGAGACGAGTTGAAGGAGACCACCAGTAAGTCTGCCAACCTGTCATATTTGGAAGACATTGAAAGGTCATCGAGGGTTCTTGTGATATCAGATGTAAAATTTTCCTGGGGAGAAGGGAAAAGACTGGAAATTTTTTTTTTAATTACATGTATCTTTTTTCTAGTTTAAGGTTGTTACCAGTTTCAAACTGCAAAATCAATAGTAGGTGATATTTTGTATACTAAAGCATTATTTGTGCTAAAATTGATTTTAATTTAGCTTAATTAAATGTTCTGTGATGAGTTGGGTTAAAAAAAATACAGTTGTAAAAAAGTTTAGTAAGTCATTTATGTAGAATAATATGAACATTTTAAGGACCAATATTTTTTAAGTCAAAAAGGGAC…
CUFF.3800.2	chr10:62657408-62660785	-	AATTCGGTATCTTCTGTGTGTGCTGTTGCAAGCAGAACACAGTGGCTGGGTGATGATCAGGAACCACAGAGAAGATGACTTATCCCTGAACTTTCCAGGCCTTGAACTTGAGAAAGATTGGCAGTGATAGCAGGAGTGGAATAAGAATATTGAAAAGGCCGGGAAGAAATGGCATTCCCACGGTCAGTATTGGCAGCACTTCACCCGGAAGACCGGCATGGGGAATTTCCTGTCTGGATGTGGAGAATCTGCCCAGCGGGTGGCTCTGGACAATGGGGAAGTAGGGAGGACTCTGCGGGGCACAGCAATCATGGAAACAGTGGTCTGTAACACAACTTTTCGTCCAGTCTAACCCCCATGAACCCTGTAGGTATGAAAGCACTGGTTTGGAAAGAGCAG…
CUFF.3800.1	chr10:62657408-62661687	-	ACCTCGCAGGTCCACCCCTCCTTCATTGTCTGGCCATGTTCTGAACAAGAGGCAGATGGCTGTACTTTAAGGCCAGCTAGAAGAAACCCCAAAATACCcaggccaggattcaggcagataactggtttgactctaagtccatgctctttccactgagccattttttcaAGGCCTTATTCACAAAAGTTTACTCAGTAAAAGACATAAGACACGTGTGTAAAGAACAGAATGAAGTCTGAGCAAGgttgaccatggaccacattttgagaaACGTTTGGTTGGGCAATAACATTGGACAAATAAGTGGAAGGAAAGACAAAGAAAGAGGAAAAAAATACAGGCTATGAAGCAGAACACAGTGGCTGGGTGATGATCAGGAACCACAGAGAAGATGACTTA…
CUFF.3801.1	chr10:62674955-62694433	+	gtgatggcatttgaagaaggggcctttgggagtcgttgtttatgatgctcagggaaagaacatggacttttccgggcactgctgactctccaccttccacaaaaggcaatgtggataccagcagcctgaagacagccctccagcaaagagatgcagcaaagagatgccagttaccggaagtgaaaacactctggaagacggtggtgcaagacatggtcgagggatatgagagtatcagggaggagcatccacagGCATCCCGGGACTAAACACTCTTATGGATAATAACTCACTTGACTACCTTAGGTAAAGTCAATTATGGTTTGTTAAATCTGAATGGACCTATGTTCTCCTGCCAATGGTGAGTCATAAAAGGTGGAGAAGAAGCCATAAAATAAA…
CUFF.3812.1	chr10:64336073-64462937	+	CCAGGGTCAGGAGCAGCAGTGTCTTTTAAAGCATTTCCTGGAACACGGGGACATAAATTTGGAAGCTGCCTCAGCAAGTTGAGCACTCTGTCTCACGTGGGAGTTGGGACACTGTGAGGAATCAAGAATCTGCTGCTGAGGAAATAACTAAGGAATAACACCTAACTGTGTGAAGAGATCTTAAGACAGCTCATCTGGAGGTGCCAGCTGGCTCTGGACTCAAGAGAAGAAGCAGGCTCAGACTACAGTGAATGACCACACAGACTGCTGGT
CUFF.3829.1	chr10:64901819-64902700	+	GGAGAGGCATAAAGGTGAACTTAAAAAGAATTCTGAAAATAGTGAGAAGTGAACAAATCGCTGGCCACAGGCATTAGTTTCTGCCAGTCAATAATGTGTTAATATACTGCATATTTAGAAAACAAAATGAAACCAACAATTATGGGAAGAGGAAAGAAAAGCCTACaacaaatgaactgattgtatttcaagtgaattctacttctgtagtgaagaagataaaaacaaaatgaagaactaatccaagtaactttcgagcacagtgttggactggacccctgccgccttgggtaaggctgagcgatgactagcgcagcaaatgaatcccaaactcttccaatacatttgtttcttatacaggtattggtgcagcaattctctattttaaatgaattacag…
CUFF.3855.1	chr10:66359159-66371369	+	TCAGGGGAACTCCACTGTGGGCTCCAGGTCTGTGATTTATGTTTTGCCTGTGCTTTTCTCTGCACTGTTGAGAGGGAGGTAGACATCAGATGTGTCTAGCTCAAAAGATAATGCACAGGACAGAACAAAGGTGGGCAAGAAGATCTTGTAGGTGCAAACCAAACGCTGATGATGAAACAACCAGCAAAGTGAAGCAACTACAACAGCAACAGCAATCCTCTGGAATCAGGTCCAAAAGGCAGACCTTGGCAGTGGTATCCCTGGAGAACACACATCAGCATCTAACCCTGTCTCAAAGGAAGAACCTGGACCTTCTAGAGCTgctaacattgaggaaagcaggatgggggatagagaaaaacaaatttcatgttacatggattgagctgccagatcaag…
CUFF.3868.1	chr10:66976304-66983391	+	TTTGAGGCAGATGTGCATTTAAAGAAAAAGAAACTTCTAGTCATCCAGCCAGTAAAATTAATTTAACAAACACACATGGGCAGGTTTGATTTGATATTGCTCAAAAATATTTTTTTTCTCAAGTGATCCATATTCCTATTCTTCACTCGCCACCCCTGTTCTGACTTCTACTTATCCGGGAAAGTATTATGAAGACATATAAGTTAATGGAAGGAAGAGGATGAAATCTTTCTGCCCTTTTGCCGGATCCTCCCAGAAGAAGATGTCCTAACTTCAGTGCAACAA
CUFF.3869.2	chr10:67071903-67083409	-	GAGTGGCAGGGGTTAAAAGGCAGGTGGAAGGGGCAAGAGTTTGATAGATATTCTTGTGACGTTTTCCAGAAAAGAAGAAAGGAAAAAAAGAGCTAGATACACAGAATGATCTACGTGATGGACAGATAAAGAAACAAAAGTCAGCTATCCAGATAAAAGAATCATAATGGTCTCAGGGTTGGAAAAAAgttcctcatctgcaaaacagggatgatgggataatgccacctgtcagagggattggagataatacatgcaatgcacagcatggcactgaggaggagttcaataaatggtTATTGTTT
CUFF.3869.1	chr10:67071903-67085832	-	ATAAATTGTTATGAGAATAAAGTCATAAGGAAAACTCAGCTTCGCAAATGACACACGTAGAAAAACAGCAGATGTCTGATGAAGTAAAGAACCAACTTATTGCCAAGACCTTGAAAAACAAAATTAATTTCCTTTCGTCTTTGATAATGGTGATGTAATGTAGTTAATAGGAAGAGCCTGCCACGCTCAAGTAGTTATAAAAGGAGAAACGTTCGCCAGGCACCGGGTCGGAATCATGGGTTTTAGTTGCTGTTACTCTTACCAAGTTGGTTGCTAGATGAGAAAAGAAGAAAGGAAAAAAAGAGCTAGATACACAGAATGATCTACGTGATGGACAGATAAAGAAACAAAAGTCAGCTATCCAGATAAAAGAATCATAATGGTCTCAGGGTTGGAAAA…
CUFF.3899.1	chr10:68224525-68237049	+	TGACGGGGACAAGGAATGCAATCAGGAAAATGCTGACCTGGAACTTGAGTGGGTGAAGCTGGATCCTTTATCACAGGCTCAGGAGACAGCCCGCGGCTTAGAGACAGACTGCTTTGAGGACGTTGGAACCGCCGAGGTGCTGAGTAACCCTACTGAGAAAGAAAAAAGAGGAGGCGCTTCCGGAGTTAAAATAAGACAGAATGCATCATTGGAGAACACAGTGGCTGAAGGACTGGCAGAATTCTCAACAGCTCAGGCTACCACATACTGTTCAGTTTTCGTTTGTACTTTGGAGGGTCTTTAGAAACCTCTGACAAAAAAATAGAGGTACAGTACCTTTTTAGCCAGTCAA
CUFF.3998.1	chr10:71259998-71400128	+	gagccaccTATTTATAGCAAGATACTAATCCAAAATAGAGGGCCATTGTACCTATGAATGGATCCCTTAGAAGAAGAATCTCAGGAGGATCGacttgaatgaaatgctacagatgggagatctgaaatcctgagggagactcctgaagggctggattatgcaaccaagaagtgaacggggGCACTGGTTTGCTCTGTCTTTTTGAGGAAAATTAAGGTGATTCCCTGCCCCTGTCCCCCATCAAAATTTATCCCTGGAAGCCTGATGAACCAGTTAGGAGAATCTGGAGTTTCTCTTCTTACAGAAGCTCCTGTTCTTTCAAGTTCCAGCCAGATGAATGGACCAGTTTCCTACTCCCTGTTGCCACAGCATGCTTCCAACCATCACTGAAGACCCAGC…
CUFF.3998.2	chr10:71343468-71400128	+	GAAGTTTGGCTACTGTTTATCCAGTCTGTCTGAGATtctgtaaactggagttaatattacctctttcgccaagctatcatgaagattcagtgcaactatataattacaaagcatacaacataTATAGAAGGCCCTTGGCACTGGTTTGCTCTGTCTTTTTGAGGAAAATTAAGGTGATTCCCTGCCCCTGTCCCCCATCAAAATTTATCCCTGGAAGCCTGATGAACCAGTTAGGAGAATCTGGAGTTTCTCTTCTTACAGAAGCTCCTGTTCTTTCAAGTTCCAGCCAGATGAATGGACCAGTTTCCTACTCCCTGTTGCCACAGCATGCTTCCAACCATCACTGAAGACCCAGCCCCTGCCTCTCACTCTGGCTTTTCACGTGGACTCCTGCAGATA…
CUFF.4032.1	chr10:73081044-73083037	+	TGGCCCCGAGCGAGACTCTTCTTTGGCCCTAAAGGGCCCCCCACAGTTGGCTTCCCTCCCTCGCTTTCTCCTCTGGAAAACTGGAGGCGTCGGTATAAGGTCTGCGACGCTTCACTGGCGATTGAGGTGCCGCGACGTGGCCAAGGAGCCCGCGGAAGAAAACCGCAACGCCAACCAGGCCTTCACGTCGAAGCGCCGCAGCAAATGGCCTCACCTGGTTTGGCTGCGTCTTGCCGAGGAACAAGGAGGAGGTGGAAGGCCCTCTTTCTTTCATCGACTGACCTGGGCGCACACTCTGGAAACCAAAGGGTCCCAAGGACAATTACTGTCAGACATTCCCCCACTCAAATCCAGGAAACTTAGTTTACACTACTTCAGGAGAAATGCCTGTATCATCTA…
CUFF.4045.1	chr10:73650096-73652942	+	GAGCCTTGAAGTTTACAGATTATTTGCCTGACTGGGGAAAAAAAAAAGGCCTAATCCAAAGTCCCCAAAGACCTAGCTGCTATCCACAGTCAAGGATGTTACGACTTTTGGCCTAAGGAGGTGAACTACAAGGATTTGTAGGACTTAGTGCAAAGAAAACCCAAAGTAGTTCTGAACATTGCTTGGGATTCCATCTTTTATATCTAGAATGAATGCAGTTTGGAAGCTTTAGCTGTTAGAGAAGACTGAGGGAGACCCAGCTGACTTGAATTCCACTTCCCTCACTCCTGATCATCTTCAAGAGAAGAAATCCCAGCACTGTCCACAAGTTCCTATAGTATGATCCAGTCTCCACTACACCTGTCCT
CUFF.4049.1	chr10:73944126-73946621	+	cctgctgctctgcccaaatctctaagtgttcaccaacccggaacctctctgaacccattatcacGCCCCAGCTAAGATTCTAGGGACTGACTTCCCGAGGCTCAGAGCTGTCTCCTGGACTTCAGGGGGGCTACCAACAGTAACTGCTGAGACTAtacaatggatcttgaagaatgtggaccttgagtcaggagacatagacttgaaacttgactctgcattcgccctacagtagcaaactcccaaacctcactctcttcattgattaaatagcaacaataatacccactttacatgactatggtgaTTTTTAAAAAATAGGATGATTTGTAAGCttgaactgtggtgttggagaagactcttgagagtcccttggactgcaaggagatccaaccagtc…
CUFF.4051.1	chr10:73946693-73948694	+	GGCATGGGGATGACTGGATCGGGTCTCGAGAGGGACATTAAGGCATACTGGAAATAGTGTGTCTGGAATCTTGTGTACTTGAGTCCTCAGGAATGCACGGTCTGGGTAGCTTTCTGATGTGACTTACAGAAAGGTCTCGTGGGGATAGAGGAGGAATGTGGTAACAGCTCTGGATCACCTTGGAAAAATAGCGCTCATTTGCCAGCCTGGCACTGCAATTCCAGGAAGCAGCTGTTGGTGAATCAGCAACCGTCTCTTTTCCTGTGGTTTCAGGAAGCTCATTCAGGGCCTCACCCACCTCCTAACCAGGAGAAACCCCTCAGCCACACATGGGCTCTTCTGGGAGGGACTGAAAGGGGGGCTCCCTAAAGCTGGGGGAAATGGGAAGACATGAAGGAC…
CUFF.4051.2	chr10:73947359-73948694	+	AAAAGGAGGGGTGACCAAGTTCCCACTACCCTTCCCTGGCCCTCTAGCACCTCTCCTCCAAGTGGAGTGTTCCTGCTCTCTGCCTTTGTACTGGCCAACCTCTGACCTCCTGAGGTTACTGCTTACCCTGGAACAGCTTTGGGCCACTGGACATAGCATTTGTGCCTTAGTTTTTTTCTCACAGCCAAATGGATCTAGGCAAGTAGTTAACAGATTTTGAGAGGAGGGTTGCTTCTGATTTTCATACCCTCACGAGAATTAGTTGTGTGTGTGTATCTGGCTCACCTCCATGCTATTACATTCAAACACGGGTTTAGATTTCAGTGACCCACATTCAGACCTAATGATTAAGAAAGCAAATCCATGTTCACGGATGATTCAGAAGAACTTGAAAGATGA…
CUFF.4072.1	chr10:74575944-74592560	+	tagaggaggatgagtaagcaaaggatctaagaagtgacaagagttgttgcacaaatactgggtgtacaagtttcatcaacggcactgttagcctgtgccagggactgtctatgctgctccaatggtcagagatggatctgcgttgccagcagTTGGGCTGGTTTGTGGCAGAGCTGTGAGAGAGATGGTGAGGTTGCCCTGTCCTCCAGTATGGCATGCTGCTTCCTGTTTCCTGCTGAAGGCATCCCAGCATTTCTGGAAGTATGGGGTTTTCAGCCATGCCACCCTGACTTCTCGAGAAGGACAGAAAGATAGAAGAAGCTGATCACCTGATGCTGAAGGTTTAGCCCATCAAATCGCCCAAGTGTGAGAAGGAGAGTGTCATCTTCCAGAGGACCA…
CUFF.4072.2	chr10:74575947-74699971	+	aggaggatgagtaagcaaaggatctaagaagtgacaagagttgttgcacaaatactgggtgtacaagtttcatcaacggcactgttagcctgtgccagggactgtctatgctgctccaatggtcagagatggatctgcgttgccagcaggagctgacatcataattaacaattctgaagtcctgaagtggagaaacccttccaagaagaaaactggacctgaaaactgcct
CUFF.4077.1	chr10:74978829-74984728	-	GAGGCTGTAGTCAGAGAAAAGAGATTcaagatggaaggtgtctggctgcctcaatcatcacatgggaaaaagcaggccatgactacactgagccattatgagctgatgattatacaacaaaacaactcagcttaaactctgcactaaggattatgtaccaacaatgtatcctgcttgaggacaatttctccttgaaaatcttctaactaatcctattatcttagaatttaaattgtgagggtgggtctggtaagatctttacaaacttgagacatgcttttgatttattgttataaccaactgaaaaagtatatagctcccttgctaagactagcaagaggggcactttcagtccctcttctgatgcctatggcagaagctttctctatgccttttatg…
CUFF.4107.1	chr10:76121242-76133541	-	TCCCTGACCTGGCTTTGCTCTCTGAAGCAGTTTTAGAAAGAATCCTCCAGGCAACTTCGTGCAATAGCAACCACTAATCCCAAGAGGAAACAGAGGACACAGGAGAAAACGGAGATTTGCAGAGCACACATGGAGACAACAGAAAGCCTCATCGCTTATTTTGTGCAACAATCCTCTGATGTCCTGACCACCGTTGACAGGACCAGACGTGGGGAGGACCTAGGTTGGACCAGAGTCCCCTCCCCAGGGAGTCTAGCCTAACTTCTGGATACTGTCTTAAATGGAGACAATGAAAGCATGAGACCTAGATCTGCCATTTTGCACCGTGTAGCCTGGTCTTCGAAGAAAGTGCCTCTTTAATGAGAGAAAAAAAAATAGAGTACAATCACAGCAAGGGAC…
CUFF.4157.1	chr10:77083750-77084714	+	GTGTGTGCTCAGCCCTAGACTTTCAAGGCAGCTTCAAGTGAGATATGTTCTGACCAGATTCCAGCCTCCAGTCCCTGTTCCCAGCCCTTCACCAGAGCCGTCGGGTAAATTTTCTAATCCTCTCCGGGACATTCCTATTTCCTGCCGAGAAGTAAGAAAACAACAGTGCTTCCCTAAGGGCGGTATGCCTCAGCCCTGCCTCGCAATCTCCATTTTAGGAAAAATGTTTCCCCGAGCACGAATCCTCTGAAAGGAAAAGGCCTGTGAGTCTCCTGGGAAAGAATATGAGACCCCACCGTGAGGATTTGCCGTAGAATTTCGCTGCATTCCTCTGCGGGACTGGGCTGTCTAGGAAGTTCATTTTGATTTAAAAATATATCAGAATGGGAATGTGTTTGT…
CUFF.4243.1	chr10:80661720-80668338	-	aggagagagaaaaacaataaaaccaacacccaaatgataCACAGTCATCTCTCTGCGGAAGCAAACCCTGCAGATCTGGGGACGTGGGAATCCTAGAAGGGAGACtgtagtaggttagagagtgataagtgttaaggaggggaggctgagtcagctcaaagcaagtgagagtgcaagggggtatgaggagaacttgagatgagccaggtgatcagagggagctttggtgagaaggtgacattttagtgaagacttgaagagGGCCTCCGTGCAGCTGCTGCAGCCCGAGGAGTGCACCTCCCGCCCCAGCACCCCAGAGGCACCATCAGAACACACAGCACGGGCTGGATCAGTTCCCTATACACCTCGGCGCTTTATTTTAAGCTGCATGTGAATCCG…
CUFF.4243.2	chr10:80663344-80668338	-	aggagagagaaaaacaataaaaccaacacccaaatgataCACAGTCATCTCTCTGCGGAAGCAAACCCTGCAGATCTGGGGACGTGGGAATCCTAGAAGGGAGACtgtagtaggttagagagtgataagtgttaaggaggggaggctgagtcagctcaaagcaagtgagagtgcaagggggtatgaggagaacttgagatgagccaggtgatcagagggagctttggtgagaaggtgacattttagtgaagacttgaagagGGCCTCCGTGCAGCTGCTGCAGCCCGAGGAGTGCACCTCCCGCCCCAGCACCCCAGAGGCACCATCAGAACACACAGCACGGGCTGGATCAGTTCCCTATACACCTCGGCGCTTTATTTTAAGCTGCATGTGAATCCG…
CUFF.4306.1	chr10:82858118-82862386	+	GATGGCAGAGTGGAAAGGACTCACAGACCAGCCAGAAGCCCCGGAGCAAGGCAGACATTCCCAGAAGGACTTGGCAGAAAGAGTCAGACTGAGAAGCTGGCTGGCCGGTAATGCCAGGAAGGGGAAGAGATATGTGCTTTAGGAGCAAGGAGAATGGGTCAAATTGCAGGAAGCTACCTGGGGAAACACACACATCAGTCTTATCTGTGCGACAGCACTGAAAGACCGTGGCTGGTGGAGAGAGTAATAGTTGTTATGATGACTGGGGAAATTTTCTTCAACAGACTGGAGAGAAacaatgtgatgtagtcattaagatcagtgggcactggaattagacaatcaggaatttgaatcttggctccaccattttttgcctgtgtgactgtgggcaagtta…
CUFF.4327.1	chr10:83656652-83740151	-	gtggggtgccattgccttctccGCTGGCAACAGCAGTGGGGACGAATTAAAGACTGGTAAACCTGATGCTAAAGAGGCCTGATAAATGGTTACTGATGATCCCAGCAAGGAGTAAGAAGGGTTTACACCTGGGCAACAGTAGTGGGCAGTGGATTAGCAGATCAGATGAAGAAGAAAGATCTCGAAGTTAGAAcagtttgtctacaattttataaacactgaggcacttgggccacctgaagtgtgcagtgctgtttgtcctaaactaatggcccccatcttctatgGGTAGCAGTAACCATGCATgctgggaaaactatttttttcggtgcatccttgagggtgtttctgaaagagattagtatctgaattggcagaccggtagcctcatcagcacag…
CUFF.4328.1	chr10:83804130-83804891	-	GAAGCGGCTCAGAGAGACGGAGGCTCCTTCCGGCAATTCTAGAGCTGGCCACCACTGGAAACTTCGGTGGCGCCAGGATTCTCTAGGGATTCCTGGTCCGGAGCGGTTTGCCCGGTAGCTTTTGAGTCCCTCGTTGACGTGTAGCTGGCACCCTCTAAATTAAAATGGGCCGCCGCGATCGTCAGGGATAGTGTTTTACTCACCTCGTCATTTTTACTGATTCACCACTTACACCACAGGCTGCATTTGGAGAGGTGTATGAATCTTCTCGAGTACGCCACGAAAGAACTTTTAAGAAAACTTAAGTCTGCAAATAATCTTGGAGAAAGAAGGAAAACGCTGGAGACAGAAAATGAGAAAGGgttcgcacggggtcgcaaagagtcggacaggactgaa…
CUFF.4468.1	chr10:88418552-88427277	+	GCTGCTGGCATAGGCCGCGTGGCTTCGTGGGGTTCCTGAAGGAGGGAGTGGGTGCCACATTCCTGGGCAGGGGAGAGAATGTCTTTGGCTGCCTATGAGTGTCAGGAGGACCAAGCTGGAGCAGCAGcaaccactgaaaatccagcttcttgaacctcttgcgaccactgtaaagaatgtagtatgagccaacgctgaagat
CUFF.4481.1	chr10:88904715-88911902	+	TTTGGGGCGGAGGGGTGAGCAGGAGGGAGGCAGAAGCTCTGGGTACAAGCATCCCAGTCCAGTGGTGGAGACTTAAGAAAAACCCGGCACTGTGTCCTTATGGACCTGGCTTTCCAGACAGTGCCTAGAAGGTGGAAGGACCCTGGGAGGAAGGAAAGCTCAGCCAGGACCGGGAAGAAACCAGCATCCCTGGGGCGCGTTCCTGGAAACGTCTCTTACTGCAGCAAGATCTCTTACTAGAAGGCGCAGACTGGAACCCTCTCCAGCTTCGCTGACAGAAAAAAGGAAGTGGAGCAAACACCTACAAAACAGACAGGAAAAAGGAAGTGGAGCAAACACCTACAAAACACCTTCAGGACTGGCAGTTCCAAGCCTCAGCTAGCAGCCTATAAATTTACC…
CUFF.4565.1	chr10:92236225-92250401	+	GAAGCCCGGCTGGCAATGCCAGGCCCACACGGCCCTGGTTTAGGTTTTTCTCCGTGAAAATGAAGGCTTTCCCAGCGTCCTGGGTTTTATCCTGCTCATGTTGAGACACCTTCTGCTTGTCCTGGAAGAGAGTGAGGTCACCTTGCTGGTTTTGCACTTTTCAAGAAATGCTCTTGGAGCCCTCGTGCTTCTCCTCGGCCAGTTAGCAGAGAAAGTGGCCTACATGCTCGTGAACCATCGAGGTGGAAATAGAAGCACGGAGAGAGgtctgcaaacgaagtgtgaatgagatgtatcaggatgacagagaatggagcatctagattgcctggcgtgtactgaaaaggccaaaaagagacagtggcatcaagaaggaatcaa
CUFF.4567.1	chr10:92341122-92412418	+	GATTACAGACTCCACAGTGAAATTGCTGGAGGAAGACACAGAAAGTGAGCTGGCACTGGGAAATCACGTGTACTGCTCAGAGAGCTAGAGGGGTGAAGTACATTTGCCAATTGCCATTCTGGATCACTTCTCCTTCAAAGCAAAAGCTGGGATTTACTTATCTTTAGAACAATGTCAACTCTAAGAAATCTGTTGAATTAAATATTTATGTTGACTCAATTTCTAGATTTTTAAGGCATGTCTAGATATATCTGAAATTTGGAAATGTGGAAAGAAAGAAAAGCTAAGGGATACTGGcagtggaagtgagaaatagatttaagggactagatctgatagagagcctgatgaactatggacggaagttcatgacattgtacaggagacaggaatcaagac…
CUFF.4575.1	chr10:92791196-92840157	-	GACTCCACCCAGGGGAAGAAAATGGCGGAAGCAGTGAAGTCAGAGAAATCTGTGCAAAAGATCCTGATTCCTCTGGGGTACGAACTTGCATGGTGCAGGGGACGAATGTTTCTAAATGACACAGGAAGCCATTTGATGCTGTCCTCAAGCCCCAGGGATTTTACAGAGCAGCGTTCGGCAGCTTCTTTGGTGACCGGCTACACCGTTTGGCAGCGAGTTCAAGGGCTCATAACTGCACAGAGCAAGGAGCCTGCTGAACAGTGAGGTTCCAGTTTAGAAAGAGTGCTGCAAACAAAGGGGTACCTGAAGGGACTGCTGTAATTAACGAAGCTTTGTTCTACTAGTAGAGTCCCTTTTATCTCAGAAACCGATGATCCTGGAGGAAAAGCATCTCCCAGT…
CUFF.4575.2	chr10:92824787-92840157	-	GACTCCACCCAGGGGAAGAAAATGGCGGAAGCAGTGAAGTCAGAGAAATCTGTGCAAAAGATCCTGATTCCTCTGGGGTACGAACTTGCATGGTGCAGGGGACGAATGTTTCTAAATGACACAGGAAGCCATTTGATGCTGTCCTCAAGCCCCAGGGATTTTACAGAGCTCCACCTCAGATCGTCAGGCACTGGATCCCAGAGGCTGGGAACTACTGAGTGGCTGCTCAGACTACGTTTGTGAGCCAACAAGTGCATGAAATGGATGGATTCCAAGTCAGGTGCCTTTAGCCTCAGTTTTGGACCTGAGTACTTGTGCCCCAGTCTCCAGGTGAATGATCCGTTGCAACGTGTATCTCCGTTCCCAGGATCCAGAGGTTATAAAATTTCTTGTGTTCAA…
CUFF.4610.1	chr10:94549883-94568199	+	tGGTGAAGGACATTATCGTAAGAGCATTAGCAGATTTCAACTGTGCAGAAATAGCCACCGGGGCCTGAAAAGAGTGTTGAAAATGCTATAGAACCAAATCATGTTGGAGACATGGAGGTAAAGAATCATGAGGAAGGAAGTCACATAATTGGAGCTGGTGAATGAAGCCGAGCCCGACATGGGTAGATAAAAGTTGATGAGAAAATGGTAGTCTTTAAGACCATTGAAGTAGAGGGGAATGCTGACTGTAACACATGGCAGAACAAGGCGAAGAAAACCCTGCACTCACTCTGAAAACTGTGTATGCATGTGTTAAATGGTAATGCAGGGAGCCCTCTCTGTGGTTCACCCCAGCTGCAGTGGCTTCTCATTTTCAATAAAAACTTAATGCCTCTCCCA
CUFF.4617.1	chr10:94714477-94801208	+	agagtggggatgaaggggcagatggaagacactcaccacaCTGGgatatcaggacatacaacgaaacaagagggatacaagtgcacagaggggatgcatgtgaggagacggtgagaagacagccactggaaaaccaaggagagaagcttcaagaggaaccagacctgtccacacttgatctgggacttctagcctccagaagcatgagaaagcaaatctctgttaaatcacccagtctgttatattttgatatggcagccctagccaatcaatacGTTCCCCTCTCCTTTCTTGTTCTTTTAAAATTAAATCTACAGTCTTACCACTGGGGAATATCATGACAAAGCATTTGATATCGGGAGTTGATGAGTTGTTATTTAAAGGACCCTCTAATGTGCC…
CUFF.4617.2	chr10:94747922-94801208	+	attgttgtgtcaggaagtccagttcctgcactcctggctttgaagatgaggggagcccagccaagggagcaaatgacctgtaaaagttggaaaaggatatcaggacatacaacgaaacaagagggatacaagtgcacagaggggatgcatgtgaggagacggtgagaagacagccactggaaaaccaaggagagaagcttcaagaggaaccagacctgtccacacttgatctgggacttctagcctccagaagcatgagaaagcaaatctctgttaaatcacccagtctgttatattttgatatggcagccctagccaatcaatacGTTCCCCTCTCCTTTCTTGTTCTTTTAAAATTAAATCTACAGTCTTACCACTGGGGAATATCATGACAAAGCA…
CUFF.4617.3	chr10:94747925-94801208	+	gttgtgtcaggaagtccagttcctgcactcctggctttgaagatgaggggagcccagccaagggagcaaatgacctgtaaaagttggaaaagaaccaCTGTTCTGGAATGTTGAAGCTAgatgttgaaacagaaactccaatactttggccacctgatgcgaagagctaactcattggaaaagaccctgatgctgggaaagattgaggcaggaggtgaaggggacgacagagggatatcaggacatacaacgaaacaagagggatacaagtgcacagaggggatgcatgtgaggagacggtgagaagacagccactggaaaaccaaggagagaagcttcaagaggaaccagacctgtccacacttgatctgggacttctagcctccagaagcatgagaa…
CUFF.4617.4	chr10:94747965-94801208	+	agatgaggggagcccagccaagggagcaaatgacctgtaaaagttggaaaagCTGTTTTTTCtgctatggtctgaaggtttacattgccctcagctttgtatgttgaaagcctaacctccaaagctgatgatctgagtagctgcgacctttgagaggtactgaagtcctaagggtggaaccctattaaataagagattggagccgtattaaagaggatgtggagaggtccctagccccctcctgtcatgtgagagcatcatgagaattctgcaacatagaagagcagaccaggttggaaccatcttcctggatttcccagtccccagaaccatatgaaatgcgtattgaaccaCTGTTCTGGAATGTTGAAGCTAgatgttgaaacagaaactccaata…
CUFF.4790.1	chr11:2762980-2765930	+	GAAGAGGGAGGTCACAGGTGAGGGGAAGGGCTGCTGTGATGCGCCTGGTCCGCTGTCGTCGGATCCGAGTGGGTCGCCGGTGGCCCCCGAGGTGCTGTGTGGCTAGAAGGCGCCTAGAGAGCAGCAAGGGAGGCAGGGCTGGGTGTGGCCCAGGTAGACCCCCATCACCTTTCTCGGGAAAAAAGGTGACATCACAAGTTTTTCTTAGAGCTCTGAAACATTTTAAGCTCTTGGCTTCATTCCCGTTCCAGCTCTCTGGGGCTTTAGAGAAGTGGGAACAAGAAGGCGTTTTTGTCGTCTTCCGGTTACCTACATCCACCTTCCATGGTGCTTTAGCTGCGCAGAAACTGGGGCATCATGGGGACCCCGGGGAGGGAGGCAGGAGGATTTCTGGAACCT…
CUFF.4827.1	chr11:4140310-4141336	+	CTCCAGGCTAATTCGTGGGATGAATCATTGTTGTGACACTGCAAACGGGGAAGAAAGGCTGCCAGCGGCCTCGCAGCCTCTCCTTACTTTCTTGTGGAGACCCGCCGGTCCAGGGAACGGAGGCCACTGCTGCTGACCCTTGAGAAGCTTCCATGCCAGCTAGAAGAGCTCATGCTAGTAGCACATCGATTGATGACCAACGTCTGAGTCTTCAGCTATGTTGGCGACTTTATATGGGCACACTCGGAATCTGCAACACATTTTAGGTGGTGGGTTTGGGGATTTTCCCTGCAGGCACTGAAGACCCAAGAAGCTCGTGTTTGTACCTCTATCTGCAAAGAGCCAGGGGAGAAGCTTGGAAGGGTCTCTCTCCACTCTTGGCTTTAACTGGAGCAAAAT…
CUFF.4945.1	chr11:9720985-9722130	+	TTAACATCACACAGTTAATCCAACTAGTTCTTTATTGTACATGACAACATCTTCACTAGACTGAGCGCTCAAGGGTTTGAGATGATCTGCTACTGAGTACATCGCAGTCATAGATTGAGTCAATATACTTACACAGGCAAAGCAGCGTCAGCAAGGAACTATCACCTAACTGGGAACACAACCATTCAAAACACATTTTCCACCGTTCCGTTTTAGAAGCCACACACACAGCTCTACCTTTTAAAAATGTGCAATTTCATAGATGGTGCCTAATCTTTCAAGTTTAAAAGTTAAAGTTCACTTCTATTTCTTGGGCATCCCTTAGTGATACACAAATCTAGACACTGTTCTCACTACAAGTTTGATAAATGTGCAAAATTTGGGTGCTTTGAGTTGTGT…
CUFF.5177.1	chr11:20252533-20254835	-	ATTTGACCCCCAGCTTTAGAAGAAGCTTCCTGACAGCTTTAGAAGAAGCAGTTCCCTCTTTTACTCAAACAAGGCTGCTCTCTGGGTTTTTAACACTCTGAACCAGCAAGAATCTTTGAGCAGCTCCAGTGCAGCATGGGCTGCAAACCTCCTCCCTGAGCATTCCAGACTCCCGCATGGCTCCTAGCCGCTCCCAAACTGATGCATTCCCGATGGGTAGGATTTGGTAAAGTTGAGCCTCAGTCCAGGGAGTCCCATGGCTGAAGCCACTCACTCACAGCAGACTCGCTGCAGGACGAAGGGTGCAGGCAGCCACGGCCAGCAACACATGTGCTCCTCAGTTGGGAGACCACCTGCCTTGTCCACCATCACGGTCCCTGCCCAAGGCTGCCGGCTGAG…
CUFF.5178.1	chr11:20257810-20258799	+	GAATCACGGACTAAGTCAGAAGCCGAAGGTACTCCACTCAGGAGGGGGAGAGAAGGGCAGGCTCCCCACTTTCTGGAGAATGCAGAGGCGACATCTGGCAGAGACCTGAGAGGTGCGGCACTGGGTGGCTGGAGGCAAGCGCTGTCCTAGAGCTCTAGCTTCCTTCCTCCAAGAGCTTGGCCAGAGGATGTGCACACTTGTTCCTGAGTACAGTCAGTATCTCAGTGGTCACCAGGGTACCTTGTGAGAAGGAGCTGTGTAGATTTGGAGTTTACTCACAAGATCTACTTCTCTATGGCTATGAGTATGAGAGACTTCTTTATTTaagatctggttttcgcttaaccagctctttcacttaactagctacgttgtctcaagattcttattgtctctatg…
CUFF.5234.1	chr11:22202978-22273868	+	cagtgcagttctaataaTGCTCTGCTCTCTCTGCAGCTGGCCCCAAGCTGGTTCTCTGCACTTGGAGCACCACTAAAGAGAGAGATTTGTGGAAAAGGGCCCCAGGCACACTGGGTCTTAGCTCTGTTTTGGAATGTTTGTGGTGACAGTTACTTCCGAAGCCTTAATTCTGAACTCAGTCTTCTGCAAGCTCTTCGGTTAGCACCCCAGGCCATGGAGACGTCTGCCCCCCACAAGATCAGGAAGTCAGTCTCTGAAGAGCAAATATAATTTAATGGACTCTCAACTGGAGACTTCACTAAGGAGATTTCACATGTAGCTGAAACTGGACTTGGAAATGGAACCCTGACAATTGAAGTCAACATTTTTTTTTTTTTTAAAGCTCTGTGTCTAAGAACA…
CUFF.5234.2	chr11:22207517-22349853	+	gggggcaggggaaatgggaagtgactgttgagtgggtacagggttttcttctggagtgagtgatgaaagtgtcttggaactagatgtgatggtcgcataacattATCAGGAAGTCAGTCTCTGAAGAGCAAATATAATTTAATGGACTCTCAACTGGAGACTTCACTAAGGAAACAGACTTTGTAGGTCTAGATACTTCGTTCATTCAtactacgtggcagccacaatttctcctgggaagacagcagaaaacaaagcagaagatgtccctgccctcaggaaggttgcagttcagtcagggtggagagaaggagcaagtcaacaaaaaCCGCCCCTCTAGGAATCGTGCGAGGAGTGCACCTTCTTCCCTGAAG
CUFF.5234.3	chr11:22255711-22267652	+	gctacactaatgtgctggcacttctctggaaatttggatttccacaaagaatctctcatccatgaTGATGCATCCTCCATGACTCCCCAGACACCTCCATGAAGTAGGCAGGTGCACTACTGGAAGACAAATAATGTATCCctaggcatggctgaggacacaaagttgaattagacctggtcagtttttgctctcaagaagttTGGTGAGTTGtatcctcatctgacagatggaaaaatgaaacaaaaaggatttttttcaagtcattcaactggaacatggcaaagctgtgcctattaacaacattttatgacttccatccCCAAAAGAACTGTGCTGCCTATCCCGGTTACTGGAGTATTAAAACAGAAAATGACTGGCAAGCATGGGTTCATGACT…
CUFF.5339.1	chr11:22819699-22824044	-	TGAGTGGCGAACATCAACTCGTGCTTGAAAAATACCAACTTGGAGCCCGGTTTGAGAAGCtacatcagagtctcgagatgcgacgctacaatctgcagttttcactagcttcccagATTAAGTACTGGATAACCCATATGTTGGTCATGAAAGGGAAGAAAAATGCATGGCCCAGCAGTGTGTTAACTCCAAATAAAATGACAAAAAGAAAGTGAAATTACAAAAGGAAGGTGAAGTATAGTCAGTAACACCTACAGGACTATTTGTAGGAATTGTATTAATTGCTGTCTCTAATAACTCACTATGTTTTGAAAATTAAATATTTCAAGAGAGCTTC
CUFF.5271.1	chr11:24394339-24398893	-	ggactgcttatccttcatgcaatcctctctgaatagtgttatttctcaacagggcttttaagtaaatatttagtggtagagggttcaaactgtccttcctcgctgggcttgaagagcagtgttcctcatgtcctgtgagttcctatccacattttgactgatgattgagcttgggtgagattggcatccctttggaaagctgagccctcccatcactgctcaccagcaagatcagaactctctgctaaagttgcctggagcccattccacagcatcagggaatgaacaaacccagagctccaaagcctacttcaattaacatggctgatgcagtgcccatggctaagaatgtgtaagatcggtataaccagacccttgccactgcccaataaaatcttg…
CUFF.5337.1	chr11:27070104-27081014	+	TATCTGGGAGGAGGTCCATGGAGATGACAGCGTCTGATTACAGCCACTTAAGGGATTATACAGAAGACTTGACATTGAGTTGCCCTCTGGCCACCCAGTCAATAAGGAAGGGGCTGACAAGATGGGTGAAAGAGGAAGGAGAAGACCCCAGCCTATCCCCGGGAGTTTGCTGACACCCATGGGGTCCATCAGAAAGCAGTTCAGGATGCCTGGCAAAAGGAACATGACGAGACATCTCAATATAGAAAAGAAGCAAAGCCATCTCAGAGAAGACATCTCTAGAAGGCCTGTTATACTGTAAGGGAGGCATCCTGATGTCTGGCTGAAGTCTCTCCTTCTGCAAAATTGTCTTgggcttcccaggtggctcagtggtaaagaatccacctactaatgcag…
CUFF.5341.1	chr11:27181706-27187130	+	GAGGGTTGGAGATCTTCTGGGGACATCAGTGCTGTGACTCAGGGGAGGACTTAATAACCCTCTCTGTCCCAGTTGCGGGTGTGTTTAATAGAGGAGGAAGCTCCGAGCGCTGAGTGATCGGTACCGACGCGGCTCTGCCTTCTTGCAGCTGAAGGGTCCTGCAAGCCGCCCTTTCTCTGCTTTCAGCGGTTTCAACGTCCCTCCAAGAGACGCAGGGCCCCGGCTGAATGCTAATTCATAAAACACAGTGGTTCAAGTTCACCAAGTTTTCCTCAATTTTGCAAACTGTTCCTCTTTCGCTATGCCTCAAGATTTAAGACCACGCGATTTCCCAAAAAGAAAAACTC
CUFF.5379.1	chr11:28719428-28756142	-	GGATAGGTTCTGGTGTTGATCCCCGTGAAAAGGAGCCTTTTTGAAAGGGTGTTTCAGGGGGAGCATGGCAGCAAGTGGTTAAAGGGCAGGTCCTCTAAAACTCTCCTTTGAATGGGGAAAACACTGTGGAAAATGAACTTCCTATAAAGCAGGCACAGCCCTCAAAGTCTCCGTGACTCAGGACGACGTGCTTTTTTGCCTCTTGAAGCTTACTTGCTTTGGAAATGGTTCCCGGCTCCCTGGCCACCTCCACAGCTGACCGGAAGCTTCTCTTGGGTCACAATTCCTCCTCCTCACAGGTCTGCACACTCCCAACAGcacttgtcaccatctgaaacttaaaagaagcctgttcatatcctgtctcataagaatgtcaattccatgagaaaagagacc…
CUFF.5382.1	chr11:28983538-28984996	+	GTGGGGAGGCTGGGGGAGGAGGATGGAGGGGGAGACTGAGGTGAAGAGCTGGGCAAAAACTTCAGGAGATTCTTGAATGTTTCTCTGTTTTTTGAGTTGAAACCAGGGACAAAGCGTTCCTCCTCCCACCACTTCAAGGCTGACCTTCCGCCCTCAAGCCCACCACTGCCCCTTCTCGGACCACGTGACCCTGCTCAGATCC
CUFF.5391.1	chr11:29140957-29143756	-	CACGGGTGGATAGTGTTCTCTGGAGcagggctcctcaaagtgtgggccacagactggctgcttgatacagtccatgacaagGAACAGCCCTCCGGCTCCTACACCAGGAACAAAGGAGGTGGGAGATTAGTGTGGGGGAGAGCAGAGGAAGCAGCCTGCGCATGTCCAGAGGGGAACGAGATCAGCTCCACTGGGAATACTCCTTTGGGAATCGAATGTCACAGCATTATTTGTAAGGATTTACTCAAGGAATTATCCAGTTTAAGTACCAAGTGTATTCATGATCTACAGGTGCCTCCCTGTATGAGCCTTAGCAGGAGGAAAAGCCGGGCATGTTTCTGACCTCAAGGAGCCAGTGCtgagtgttcagttgctcagtcgtgtccaattctttgtgac…
CUFF.5472.1	chr11:31798635-32034711	-	ctccagccaatagccagtgagggcttacaggttaaatgagcttggaagtgggtccgttcccatttgagctctgagatcactgcagcctcaacagaaaactgcactaaaaccttgtaaaagatccaaaatgagaggcgatgctacagctggatttctgactcccaaaaaccataagGTCCCAGGCTGGGAAAGAAGTTCTACAGATCTTCATCAGACAATGGCGCGGCATGTGAGTTCATCTCAAATCTCCCTAgagcccaggctggagtaccaagagaggccagcaaaaacCTTTATTatcgcggtataccttacatacaataatcttcacatattaaaatgtgcaatttgATCCTATCTGTTACAAGACCTCATTTAACATGGCCAGCCTCTCAGGCT…
CUFF.5472.2	chr11:31798635-32123635	-	TGAGAAGGTCAAGATGGTGGATGAGGAAGAGGCTGCGTTCACCTCCTCTCAGGACCACACCAAAATTACAACTACTTACAGAGCTACTGTCTCTGAGAACAACCTTAGGACCACCAGAAAGTACTTCCTGCAACTAAAGATATAAAGAAGTCACCAGGAGACAGGTGGAGGGAAAAGGAAGTGCTGACCTGAAGCAGAATCCCTTGCTGTCCTACAGTGGGAAGCACATGCCTTGTTTTGAAAGCTCGGTGCTCTGAGATGAGGTCCCAGGCTGGGAAAGAAGTTCTACAGATCTTCATCAGACAATGGCGCGGCATGTGAGTTCATCTCAAATCTCCCTAgagcccaggctggagtaccaagagaggccagcaaaaacCTTTATTatcgcggtatacc…
CUFF.5491.1	chr11:35122497-35123594	+	TATGGGGAGAAAATAAAGATGGGCTGTGGGAAAAATAGGGAAGAAGATGAGGCCGACCAGCAGACACCTAGAAAGGCAAGAGACGTCTGGAGTCCTGCACTACTTTGCTGAATGTTGTGAGGATGTTTCTGAAAGGAAGAGAACTCCAGGTTCAGAGAGCTGTGTAAAGAAAGGGTAACTGGCTGCCTGCACAAACCCTCAGCTGGTGGCATTTATCTTGATCAGCACTGTGGTCCTCGGTCATCAGACCTGACTCAAGAAAACTGATCCACTCTCAGCACACTCAAGAGACATCTATGTAAAGGCCAAAATGCCAAGTTTAAAACTTAAGGTTGACTATTAATCAGATGAGATATTCACTTCTGATGTAGATACATTCTTTTCTCACCAAAAAAATTA…
CUFF.5646.2	chr11:40960836-40962489	-	cggtttctttaccactgtgccacctgggaagcccAAGAACTATGGACAAAGACAAAACACAGcatttcttggtatcactcccacataaacttgttgtctgggatcctggccttggcatctgcttctggaagaacctaaattaaCAGTTAGAAAGAAGAGCAGAATTGAAAATAaggcagaataatctcccacccgaaaagatgtccacatcatgatcctcggaatctgtgaatgtgataccttctgtggcaaaagagactttttgtaaaatgtcattaaggttaattaaaggccgtgagactggggagatgatccaggtgtgccaatcaaatcacactgctcctacaaagcagagaactgtgcccaagtgaatagagggggatgtgaccatggaggaat…
CUFF.5646.1	chr11:40960836-40981583	-	tgcttggggtcatcagcacgtaaatggtttctaagccatgggagtaagggtgagcgcctcaagactgcaggtccagagaaggacacgtaggtggactgcgccttggaacgcaccagcattgtgaggtgggaacaaggaggaggattccgtaaagaaagcttcggggacagcagtgaggttgtgacccctttgtggatcatgaaatcaacttgcatttcttggtatcactcccacataaacttgttgtctgggatcctggccttggcatctgcttctggaagaacctaaattaaCAGTTAGAAAGAAGAGCAGAATTGAAAATAaggcagaataatctcccacccgaaaagatgtccacatcatgatcctcggaatctgtgaatgtgataccttctgtgg…
CUFF.5650.1	chr11:41202414-41210655	+	GAGATTTGGAACTATTGCTTTGCTGGAAACATCTGACTGCTGGTCTAGAACATGACTCCAGATTCTCCATCTACTGTGCAGTGATGCTATTACTTTGATTTCGGAAGCTCATGAAGCTGAAGTTCCTGACCTCTTGTTTACAACATGTACCCTGGCTAAGTTTCTCTTGCTACAAGAATAGCTACAAGCATGAGAATTATCATAAAGGGGGAGAAAGCGCTTCAATAATTAGGATTCATCTACAACTTGAGCATTTTATTAATTACACATTGTAATCACATGGCTAGTCACAAAACCAATCGTGCAAGTCTGTATTTAGAGATTTGTAGACAGAAGACTTAACGTAAACATAGAAATGTTAAGCCTACTCAACTGTAACCTGCAAAGAAGATAACAAGA
CUFF.5658.1	chr11:41732511-41733274	-	TGGGGAGCAGAGTTGAAAACTTTGTGAGGATGGGGCCAGTGCACTGAGACATGCAGAAGAACGTGTGATAATTTACGGTCCCACGAGGGAATGACACCTTCTGCACCAACACAGAACGGAGAACCAAGCCTCATCCTGCACATGCTGATGTAATGGAGACTTCTTGTCTAGTCAAAGGAGATAGAGGCCCAAGGAAATTGCAGGGCAAGCCCAGACCTTGGAGAAAAGTTAGATGAGAACAGGATTCGGAGGCTGGAATTCCATAAGGTCATCTTACGTACCATCACAAGTCCCA
CUFF.5661.1	chr11:41876849-41880445	-	GTGGGGGAGCTTTTTGGTGAGGATAAATATTTCACCTTGCCACTGTAATCAGGGAACCAACTGATCTTGGCTTGAGCTCTCAAAATCAGAGACCCCCAACAATGAGAACCTCCATTGTTTGCATACCCATTTGCCTTTGATTTCTCTGAAGTTTGCCATATAATGTTGTGAAGTCCCTTCTTTTAAAGGACGTGAAGATAAGCACCCATAGCAATGTTCTCGGTGCTGACTTTCCTACAGAGCCTCAACAAAGCTTTGGAGATCAGAGTTTTAAGTAGTACAGAAACAAGAGGGGAGAAATGGAAGATTTTTAAAGCTGATTACTGGAAAAGGAAGGAGGCTTCACTTTAGGGTAACATAAGACAAAGGACAATGATCACTCAAGAGCCACTGGAGACC…
CUFF.5661.2	chr11:41876849-41880445	-	GTGGGGGAGCTTTTTGGTGAGGATAAATATTTCACCTTGCCACTGTAATCAGGGAACCAACTGATCTTGGCTTGAGCTCTCAAAATCAGAGACCCCCAACAATGAGAACCTCCATTGTTTGCATACCCATTTGCCTTTGATTTCTCTGAAGTTTGCCATATAATGTTGTGAAGTCCCTTCTTTTAAAGGACGTGAAGATAAGCACCCATAGCAATGTTCTCGGTGCTGACTTTCCTACAGAGCCTCAACAAAGCTTTGGAGATCAGAGTTTTAAGTAGTACAGAAACAAGAGGGGAGAAATGGAAGATTTTTAAAGCTGATTACTGGAAAAGGAAGGAGGCTTCACTTTAGGCTGGACACCCAAGTGCTTACACTGTGGCCAAGAAAACCTGGCCTGTG…
CUFF.5661.3	chr11:41879030-41880445	-	GTGGGGGAGCTTTTTGGTGAGGATAAATATTTCACCTTGCCACTGTAATCAGGGAACCAACTGATCTTGGCTTGAGCTCTCAAAATCAGAGACCCCCAACAATGAGAACCTCCATTGTTTGCATACCCATTTGCCTTTGATTTCTCTGAAGTTTGCCATATAATGTTGTGAAGTCCCTTCTTTTAAAGGACGTGAAGATAAGCACCCATAGCAATGTTCTCGGTGCTGACTTTCCTACAGAGCCTCAACAAAGCTTTGGAGATCAGAGTTTTAAGTAGTACAGAAACAAGAGGGGAGAAATGGAAGATTTTTAAAGCTGATTACTGGAAAAGGAAGGAGGCTTCACTTTAGGGTAACATAAGACAAAGGACAATGATCACTCAAGAGCCACTGGAGACC…
CUFF.5670.2	chr11:42398284-42399701	+	gagttgagtgagctaagaggaGTGTACTCTCACTATGTTTCATGGAAAAATTAGAGGGCACCGCAGTTGGAACGGAATGATCTAGGGAAGGAAAAGTAGGAGATAAAGTCAGAACCGCGTGGACATTTTTTACAAACTTGTGACATATTTAGAAGAACCAGGAAAGtttagaagaaccactctggttggcaagttaggaggggaggaaagggtgcaagagacctgttaggatgctactgaaatagtggagAGCAAGCCAGGAGCCTTCAGAGATGGCTTGCAGCTCCAGTGGCTGCCAGAATCGGGCAGACGGGCTCACAGGTGACTTTCTATTGCTGATGAACCTCTCACCACCTGCC
CUFF.5670.1	chr11:42398284-42401466	+	gagttgagtgagctaagaggaGTGTACTCTCACTATGTTTCATGGAAAAATTAGAGGGCACCGCAGTTGGAACGGAATGATCTAGGGAAGGAAAAGTAGGAGATAAAGTCAGAACCGCGTGGACATTTTTTACAAACTTGTGACATATTTAGAAGAACCAGGAAAGtttagaagaaccactctggttggcaagttaggaggggaggaaagggtgcaagagacctgttaggatgctactgaaatagtggagCACTTTGGATAAGCGGAATGCAGCTGCACAAAAGCAAGATAAAGCTCAACCATCAAGATGATGAACAATCTGGATGAAGAGCCTTCGAGATGAACACAAAAGCTGGAGATGTGCAGTTGATGGAGGCCTGGACAGCTGAAGAATGCTGT…
CUFF.5670.3	chr11:42400158-42401466	+	CAGGGGTCACTAATAGCCTGCCTTGGGCCCTCCAATAGCACTTTGGATAAGCGGAATGCAGCTGCACAAAAGCAAGATAAAGCTCAACCATCAAGATGATGAACAATCTGGATGAAGAGCCTTCGAGATGAACACAAAAGCTGGAGATGTGCAGTTGATGGAGGCCTGGACAGCTGAAGAATGCTGTGGTCTAAGGATGAATAGCCCTCATTTGTGAATATACAGATTCTCCACAATGAATAAAAACTGAGTGGAGGTCACAATAAATAAACTTTTTCCCCCTTCTCCTTCAATAATAATTCAGGTTCCCGGCACCAAACAGCTGTAAATTGAAGGTTGTGCTTAGTTTTCTCAACTCTCAAAGGGGATAATTAAGCTAAGATCACATTGTTTGATATA…
CUFF.5688.1	chr11:43053178-43055909	-	CTCCACCTTTGCCTGTCCCGCACTTTATGACTTTCCCTGGAGCAAGCACAGTGCCTCCATACCATTCTCTGTAGAGACACCCAGACATAAGCAGCCTGTTTGAAGGGCCGAGAAGACCTATGGTAGAATAACTTTCTCTCCCAGGATGGATTTTCCACATGTTATCCACGTGTATCCAGGTCTCTGGAGTGGAATAATCACAGCCTTTGCTTGAAGAATTCCCTGCCTGTCAGACCCCGAAGGCTCAAGTCTGTGGACAGAAGATGTGTGAATACTGAGCTAAAACAGAGTATAGGCAAGAGTTTTGTCTGTTCACCACTGGGATTTAAGAACTTAAAGGCCAAGAACTGGCCTCAAAAGCAAAGGAGTGGTGATCATTTTGTAATGTATAAAAATATC…
CUFF.5792.1	chr11:48847060-48847842	+	AGAGGGGCTGAGGTACTTAGTATTCTCCTTGCAGCTGTCACTGACCCCAGAGAGCTAGGCCTCGGCTCTGCTAGCCAGCCTTGGCCAACACTCAGGATTCAGATCTCCggacagaatagcctgGATCCTGCTTTTCAAAGTGGAACCGAAACCTACATCACAGGAACATGACTGCGATGCCCTGTGTTCGCCAACCCCAAAGGATATTCTGAAACCAGAACAACTTCACCGACCTTACTGAAGAGTCAACAAGTCCTACCGCACACC
CUFF.5802.1	chr11:49277614-49282460	-	GTGACCGTGGAGTGGAGGTGTACGCGGACCTGTCTCTTTTCTGTCAAGTACCTAGTCTCGTCCCTGAGGCCTCCCTAGCCTTCTCCGCTCTCTCAACCTAAAGAAGACTGGGCGCCCACGACCTTCCTGGGTCCCTTCCCGCCCCTATTAGGTCGCTGCAGATCTGTGAACGGTGCGGGCGCAAAAGTCAGACTCTTTCCAGGGAGTTTCCCGCCCAGTTGAGGATGCACCGGGGAGGGCTGTCCCGGCCTGGAACCAGAGATTTGAAAGCAGCAGGAAAACCGGAACGACCTGACCGCAGAAGGAATGCAGAGTAGGGGCAGTAAATAGAGTGTGTTTGGTTGGGGAAGatctctttaatgcctggcttaattgaagaaagctggattctcctttctg…
CUFF.5836.1	chr11:60033290-60034414	-	ggatgcgaggatctttcacagatcagagatagggattcttttcccacatatgttattacagcatactgagcagtgttcATGACATTTTAAAGCAAACACAAAGAATCCCTGAGGCCTTCCTTTCACGTATCAAGATTCCTGAGTCTCAGCTGCCACCAGTAAAACAAACTAGGGTTTGGTAAGTTTCCCTGTAGGAAGAAAAGAGGGGGTGGGTGGGAATGGATATTGGATCGACAATGGCTGCTACAGGATCCAAAGTCTGCAGAAGCCCAAATTTTGTGGGAAAGCTGGGAAGAAGAGAAGACAATGGCAAAATAGTTACAGCTCCTAAGGATCACCTGCTCGGATGGAACAACTCAAAACAGGTTTAACAGAAACTTTACAGCATCAGCTTAAAGC…
CUFF.5858.1	chr11:60639996-60641569	-	aagaaggctgaggaccgaATTTAGTGAATGGGCCCGAAGGAGGATCAGGAAGCCAGGAAGAAGTGAGAGAGAATGTGTAAACTATGGTGCAAGTCAGCAACTTGCATAGGGAAGACTATGAATGTGTTTTCTTGACTTGGTGAGACAGGAGATAAGTTACAGGAGCGAAAGGGGAAGAAAACAGACACCGGATAGTGGAAAGAGCTGTGACTTTGGGGG
CUFF.5874.1	chr11:60891632-60917172	+	GTAGAGGTCTGTCCTATTCAtgtattcgtttctgatggctgctgtaaccaattaccacagacttggtggcttaaaaacagcatgtgttcatgcttttacagacctgaaatctgacatcagtttcgtggggccaaatctgggtatcagtagagcctccatggaagaatccattttcttgtcttttcccgtttttagagctgcgttttttgctttctttagcccatgactccatcttcaaaatgagctgagtagcatcttaaatctctttctctgcttcctttgtaatgtggttttttaaatctcctgtactaaaagctccctctccctccctcttataaggacgcttgtgataacatttaagacctacctgaggaatccaggataatctccccatcgcaa…
CUFF.5893.1	chr11:62014643-62083834	-	gagcTGGGTGGTAAGGGGTGGAGGGTGTGATCAACCAAAGCAAATAGAAAATAGCAGGACTTGGGGCTTCCATCCTGGGTCCTGACTCCAAACCTTACAGTGCCATCAAGAAGGGGTTGCTTAGCCTAAGGCCCTGACGTGATGAAGTACACATCGAGACCTGAGCAGAAGCCCAGCTGAGCTCCCAAGTCTTGGGCACCAGAAAACTTACTGGTGTACCACTGTGTCAACATTTGCAAATTGACTGTAAATGATCCTAATCTGAGTGCAGCATGAAGCATGAAGGCTCCGTATAGTAATGCCAGGAGAGCACATCCCTGTGAGCCTCTAAGGAGAATTTTCTGAAGAATCAAAGGGCATAAGTTATTGACAGCAAAGGTGTTTTAGCCAACTGACCTC…
CUFF.5895.1	chr11:62079089-62083454	-	TTGAGTGCCAGCTCTATTTATGCAGTCATGCCAATTCTCCTCGACTCTTGTATCTGAACCCTGTATTTGACTTATAAAACAGCAAGGATCATCAATGTAGATTCTCCCTTATGTATTGAAGACTGTTAAAGAACTGTTTGCTTCGGGGCTTTCTGTTCAAATGTCCCCATTGTCACTTGAAATACCAGGCTCTTTGGAAAAGTTTTTGGAAGTCCTTCTGATACAAGGAATGGCAGTGAAGACCCTACCCCCAGTCC
CUFF.6015.3	chr11:69128763-69135839	+	AGCCAGGAGAAGAACAGGCAACAGAGCCCAGAGAAAGAAGCAGAAGATGTTCCCTTGTGGGAAAGCAGGGGAAAAGCCGCATCTCGGTCCCCTCCCACCAACCCAGTCATTTCTCAGTCTGTCCAGCCACAGGATGCTGTGCGTGACATGGGAGTGGATCAGTGGGTGTCTGCAGAATTAATCATACTCTCTGATATCTGAATCCTGACTGTTTCACAGCCAGATGGCAAAATAAAACATGGTTCCCGTAAAGGTCTTCAACTTCATGACGAGTAAGATCTTAGTTCTGGATGAAAAATACCTTTGGGAAAGGGGAAATCCAACCAGCAAGGCAAGCACCTCCCTCCCTCCTAATCTGTAAAGTCATCAGATAGTTCCAAAAGATCACGACCCACCAGA…
CUFF.6083.1	chr11:71396660-71399872	+	GAGTGGGCGAGGTGGGGGAGGCGCCACCAGCTCCGGAGGCTAGGGTGACAGCAGATATTAGGCCATTATTTCAACCAAGTGTGTGTTGGACTTTAACCTGAGAATATGGCACAAGCTTTGAAGTTGGACTTTTTTTTTAAAACTGTACGCTGACCCTGGTTCAACCATCTGAAAATCAACTGGAATTTATATATATATTTAGGTAGCCACATAGATAGACCTATCCATGTTTACAAAGACTGCTGCAGAGCATCTTACCTGGGGGACAGACACACAGAACCAGTGTGTGAAGCCTGGCCTTGGAACCAGCAGCCTTGGGCATCTGACCCTGACCAGTCCCATCCATCCAAGTCCCTCTTTCTCCTTGGGAAAATAGCGAAAACAGatgaggataacaaa…
CUFF.6257.1	chr11:75792682-75808956	+	ggcgaggagggagatctatgcaagaagacagtcagctgctagccaataagagagacctcagattgagatcaagccaaatcaaacaccttaatcttggacttccagactccagaactgtGTAGTGGAGACCAGTGATGCACAGACTCCTCAAGCTGCTCAGAGCCTAGCAGGGGATGTGGAACCCCAAAGGAGCACAGGCGGAAGGAGgtgtttcctcactgatcaaacccaacagaaagctagaagcgaggccgtcactcttaaaatccacgtaggtcagcctcccagggagagaacagagAGTGAAACTGGAGGTGCCAATGGACGATCCCAGAGGCCTCATGACACCTC
CUFF.6257.2	chr11:75792682-75935297	+	ggcgaggagggagatctatgcaagaagacagtcagctgctagccaataagagagacctcagattgagatcaagccaaatcaaacaccttaatcttggacttccagactccagaactgtGTAGTGGAGACCAGTGATGCACAGACTCCTCAAGCTGCTCAGAGCCTAGCAGGGGATGTGGAACCCCAAAGGAGCACAGGCGGAAGGAGgccctgctgcccagtctgcttatcacctctgaggctgccctctgatcccttgctaagtGCCAGGCTCCCTGGAGAAGAGCCCAGAACCAGGACTTGGAGTCCAatgacatgattgtctaaaactccaaagaactgagaaacaaacaactctcaaggaactaatcagtgaacatagcaaggt
CUFF.6265.1	chr11:76285388-76319271	+	gatgccgctgggaccctaagctgtttggatgctgggatccatcttatcactaggtttggagaaactatccatgggccaggcagcaggAACACTTTTATGCTCACTCCATTGTACCTGGGATACAGCCAGACTTTCTCACACTGATGTCCAGCACTAGCAGAAGCTGAAATCCATCTATGAGCTTGTCTGTGACCATGGATTACACCTTCCTTATAGAGGCAGCCATGAGCACCAGTTTGGTTAAAGCCACCCTCCCTACCCCTTGCGGAATTTTAGCCTGCATGGGAGACTTCTAATAAAAATGACCAATTTACTAAACCCAAGGA
CUFF.6284.1	chr11:77218021-77459715	-	GAAGTACGGGTTCTGAGAGAGAGGGAGGTGCCTAACAGACTTAATGATGGTGGGCAGGAGCCATACCGAAAATTTCTTAGAGAAACGGATGTCTGAGCTGTGACATGAATGCTGAATGGATATTGGAAGGGAGCAAAGGGCTTCTTGTGAGCCTCTCACATGCAGGCACGGAGGAGATGACAGCAGAGTTGACAGCCTGGTGCTCCTGAGCCTGGGATCCAGTTTGGGAGACAGACTGgtaagagaaacaaaagcaaaaataaatgaaactacatcaaactaaaaagcttattgcacagcaaaggaagccatcagcaaaatgaaaagttggtggactgagagtattgaaccaaatagatccaaggaaagaaccctgaatggaaccactggaaatgttct…
CUFF.6284.2	chr11:77339443-77459715	-	GAAGTACGGGTTCTGAGAGAGAGGGAGGTGCCTAACAGACTTAATGATGGTGGGCAGGAGCCATACCGAAAATTTCTTAGAGAAACGGATGTCTGAGCTGTGACATGAATGCTGAATGGATATTGGAAGGGAGCAAAGGGCTTCTTGTGAGCCTCTCACATGCAGGCACGGAGGAGATGACAGCAGAGTTGACAGCCTGGTGCTCCTGAGCCTGGGATCCAGTTTGGGAGACAGACTGgtggattcttcaccagctgagcAGCCCTCTACTTGCCTTAGTGAAGATAAAAGATGAAATTACCTCTGCCTTCCTCTGCTGCACTCAAGCCAGAAAGGACCACGTGGCTTAGCTGTTCTGTAGAGTTCTCCGAATCATCACCCATTTAAGGACCAGCTCTT…
CUFF.6294.1	chr11:77841440-77870699	-	GTTTTTGCAAAGCTAAGTGAAGGATTGCAGGAAAATAATACAGTGGACTTAAGAACAACAGGAAAAGCACTGCATGTTAATGAAGTAATGGTATCAAAACATTTGAAAGatcttcagggcgagaggtgctgtacttgaggaaccacttcttgggagcttaatctacccttggacctgatttagataatgaagttcaagattgtcctgatgccatagtggattgagactttgcaggtcttgggggagggtacagtgtagtctgcatatgggaatgatgtgaattgtggcccgagTGAACACtgtgttacattgtattatccaaagattgtcacagtaatatttccattctcacatgcttttatccagtgtgccccttgtcattcttcaccatttggatct…
CUFF.6290.2	chr11:77931181-77934989	-	ATACTGCATGGTCGAAGTAAGCATGGATTTGGGACTGACTGAGGGATGTGAAGAAGAACAAAGGAGTCAGttctctacagccactgatctggacaagagccatcgtGCACCCCATctacagccatacaattcaatgtgtagttgcctgaatatttcaacatctttcacttcttggagtccttgaagatgccactctctgcctggaatgctctcctcccatcagtttgacaaacaaacttaaaggcctttctgtagctatctgtgatgtccccaa
CUFF.6290.1	chr11:77931181-77945831	-	GGTCCAATGCGGGTCTCTGAGGTCCTGGAGGAGGAAGTGCATTTGCCGaatggttaagagcccagactctgaagtcagcactacagctctgtcacttacagttctctacagccactgatctggacaagagccatcgtGCACCCCATctacagccatacaattcaatgtgtagttgcctgaatatttcaacatctttcacttcttggagtccttgaagatgccactctctgcctggaatgctctcctcccatcagtttgacaaacaaacttaaaggcctttctgtagctatctgtgatgtccccaa
CUFF.6366.1	chr11:83370629-83371295	-	GAGGAGTGAAAAATGAAGGGCGGAGACCTGAAAGAGGACAGAATCTTTTCGGAGCAACAGAACATGAATATCTGTTATAAATCTTCCACCTTTAATTACTCTTAAAGGATGAAGAAGAAAAGAACTGTGAATATAGGGCAACAAGCATGGTGGTCGGGCTCCAGATAACTgctcttgtccttgctccactactgattggctctgtgaccttgaacaagtcacttcaccttaaagaaactgcttcttcgtttgaaaatggagtcatcacatttatctgctctAAGCGAGCTTCACCAGCAGC
CUFF.6370.3	chr11:83708020-83761349	+	GAGGAGGTGAATTACAAATGGAAACTTCAGGGCAGAGGATGTGTGTTTCATCACTTTTCTAGCTTATCAGTGTCACAACAACCTCATGGAAGAGGCAGTAGGGGGATGCTGCTGCAGATGGTGCGTGAGAGAGGAAGAAGTTCCTTCATTCAGAGGCATCCACTCAACTGGTCCTAACGTAGGACGGGGAAGTGCTTGCTGGTTAATTGCCATGTCTAACTTGGCACGCCACCCTCCAGGATTCACAGCTGGAATGTTCCCACAGCCCTGCCCCTGCATTTAGGATCCAGTGAAGCAACTCC
CUFF.6445.1	chr11:90430736-90434254	+	TGACCCGGCAAAGATGCAGATGTGGAAGAGGCCACGTACATTAGAAAATCTAGCAGCGCTGATAAGTGATGGATATAAAGCTTGAGCAAGTCTGTCTGCATCCCCCTCATAAAAATGAAGAACACTGTGTTCAGCCCCAGGCCTGGAACATTCCTTTGATGAGTTAATCTCCAGCCATCCTTCAAATCTCAGCCCACTTGTCACTTCCTTAAAAAGATCTCCCATCGTCCCGCTGAACACCCTCTTCAGTACCCTCATTGCAGTTGTTTCTGTTCTGGAAAAACAAAATCCAGCCTTGATCTTGCCTGGACATCTCGCCTGAAATACCAAATGCACGTTCCATCCATAAGACATTCCCTGGGCTGA
CUFF.6445.2	chr11:90431321-90434254	+	GAAGACGCACCAGCAGGCGGGGCAACGTGAGCACAGAGTAAGACGGAGCCGCCTGGGACTGCCGGGGAGAGAGCACTCTGGCCAGAAGGACAGCGCTGGACAGAGCCCGAGATGTGGAAGAGGCCACGTACATTAGAAAATCTAGCAGCGCTGATAAGTGATGGATATAAAGCTTGAGCAAGTCTGTCTGCATCCCCCTCATAAAAATGAAGAACACTGTGTTCAGCCCCAGGCCTGGAACATTCCTTTGATGAGTTAATCTCCAGCCATCCTTCAAATCTCAGCCCACTTGTCACTTCCTTAAAAAGATCTCCCATCGTCCCGCTGAACACCCTCTTCAGTACCCTCATTGCAGTTGTTTCTGTTCTGGAAAAACAAAATCCAGCCTTGATCTTGCCT…
CUFF.6446.1	chr11:90779099-90780386	+	GACAAGAGTGAGAAGAAGAGTGAAGGAGACATCTGAGTGGAACTGGCTCTAATCCTTGTACATCGGCAGGAAGCTGGAACCGATCACACACACTGAGCCCACCACACATACTTCAAGGTGAAGAAACTGCAGTTCAGGAGACATGAGCACCGTGCCTGACATCATCCATCTATTCAATGACACCTCTGGATCCGTACTTGCCTCTCCCAGATTCGCAACTCCGGGCTTGCTCAGCTTGTCTGTACCCCTTATGAAGCT
CUFF.6523.1	chr11:95734870-95761538	-	AAAAGCAGGAGGGATTTAGCTGTATCTTGTATTTAGATTTAAATGGTGTGATCTCTGAATTCTGGACTTGAATTGCCTGTGGCCCTTAGGTTCCTTAGGTTTGAGCTACTTAGGAATCTAATGATTTTAAAATTAGGAATGTGTCATCACTGTAGAAAATATGGAAACTGAAGGGAAAATTACCTATAATTTTCCTTCCAGGCTTTTGTCAGGATGAATTGGCAGAGCTCGACTCAAGCACTAaccagagtgctgaggcctggagaggttaaatgactcaccccaaagtacacagtggagaaatatctgggacttcagagctgctgttttaatgaatcttctatcctgtttctggctcTCTTGACTGTGACAAGTCTCAGATGCTAATGGAAGAGTTTA…
CUFF.6593.2	chr11:98158643-98161010	-	AGGGCGGGAGAGCCAAGGTTGCTGACTGCTACGGAGCCACAGACCGATGACGACCACGACCTTCGGGTaatcctgactttggaatcttcatcttaatactacacctcccaattttgagtcccctgcggatgttaatagcgtctctctacgtgtgtgcaccctggtcattggtggagGATGGAGCAACAGAAGGTGGATACATGATAAGAGGAAGGCTACTCATTTGATTCATGTGAGAGAGCAAAGCAGACCAGAACAAGAGGAGGGAATTTGAGAATGATAATTTTGAGGATGAAGTGTAACTGTTTCTAGGTTGTATGATTTCACAGTAACAATAAAACAAAACAAAATCTTGAGACTCTTA
CUFF.6593.1	chr11:98158643-98161013	-	GTGAGGGCGGGAGAGCCAAGGTTGCTGACTGCTACGGAGCCACAGACCGATGACGACCACGACCTTCGGGTACTGAGAACCCGTGTTGGGCGGGGTCCCCCATGCCGCATAGCTGTGACTGATCTGGGCCTAAATGGTGAGCCCCATGGTCTCTGTTAAATTCCGCTCACTTCACAGGTaatcctgactttggaatcttcatcttaatactacacctcccaattttgagtcccctgcggatgttaatagcgtctctctacgtgtgtgcaccctggtcattggtggagGATGGAGCAACAGAAGGTGGATACATGATAAGAGGAAGGCTACTCATTTGATTCATGTGAGAGAGCAAAGCAGACCAGAACAAGAGGAGGGAATTTGAGAATGATAATTTTG…
CUFF.6704.1	chr11:101556659-101560356	+	accatggcattccttgttgttgttttaagccactaagttttggggctgcttgttacaaagcaactgatgactaaCAAGGCAGGCTCCAAGGTGTGTGAGATGAAAAAGGAAGAGCagtaataagaaacatgtgctgaatgcctgctagttgccagcttgtgctaacagctgataccgtgtgcgcatcacctcattcaacgcttgcgacaatcctcttccccagttttcagagattcagtgagtcagagccacttgtgtaaagacacacagtaaatgagaataaagacagaatctaactcagaggcatctgactttgaatcctgcattcttttcaGACCATGGCTCCAGGCTGGGGGCAAGCCCAGGGGAACGGCATAGACTCAGTGCCTGCTTCAGGGC…
CUFF.6704.2	chr11:101559482-101560356	+	GAGAGCTTGATGGACACTTCCAGGGTCCTGGAGAAACCCCAGATAATAAAAAGAGATAACCTCCTGATTCTTAAAGAGTTCCAGAGTCCCTTAACTCCCAGCCAAGAAAGTCAAGGGCCAGACACTCATTCATCTCCATTCCACAAACCaaccaacagtcactgagcgctactacgtgtcaggcactacggtgctcagtgctaagtataaactTCACCCTGATCCgagttaagttgaagcgggttcactttcctcccaagtctggctgtgtggcctcggacaagttccttcacctctcagagtctccgtgtctcacctgt
CUFF.6861.1	chr11:106465962-106467550	-	GCAGCCAGGTTCACTGGGATCCATCCCCAGGCCGCCTCTTCAGACGGCACTGCTGTTCAGCAAGTTAATATTCCTGATCTAGACTCTTGAGAAGGCCCATGGGAATGTCTTGTGTGCTGTGTTATTTCACCAGGGCAGCTTGAACAATGACCACAGTGAGGTGGGCACAGGCGGGTGGAAGAGCCCTCCCCCTCGGCGTTGCTGGCCCCCACTGTCCTTAGCAGGGGATCTCCTTGGAGGGTGGTGTTGCGGGAAAGACCACCTGCTGTCGTGGGGGCTCCATCTGAGGACTCTGAAGTGGCTTCTCACGTCCCCAGCTATGCATGTCCTGGTACATCAGACCAATGGCTCAGGGGAGTTGGAACGATTAATTGTTGTGGTTAACTGTATTTGGCCTCA…
CUFF.6949.1	chr12:13018981-13020415	-	gctttcggagtcatttaggctctgcgtctgcacgaatccaaggctggtggcctccctgcaggtgttgaccaggactacgtgctctctctctgtactttcagagccacacacgcttgaggagccaggggtggagctgtgttctcaggcatgctgaccaggtcggagccattctgtgctcggtatagagGACGACATCTAAGATTTAAGTTGAAGAATATGAAAGAAAAGAGAGAAGCAGAGAACTGAAGCGCATGCGGGATTCAGCATCTAAATGGAACACAGTCTTCCCTACCTTCCTCCCCCGTTACCACACAGGGCCAGCTGTCACCAAGAGCTGCTTCCAAAGCAATTACCATTCCTTCATCAGCAAGGAGGATAAAATCTTCACAAAGCAACAGA…
CUFF.6976.1	chr12:13897417-13906581	+	TGAGGGCATGTTGGGCTGTGTGGTGTTATGTTATGTCTGCTGCTGCCATGTGGGAACCAAAAAAGGTTGAGTCTGCTTCTTGGGTGCACTTTGATAATTTAAAAGgtctggatatgtcccagggccagagtctgcccacccatgCCTTATGCCACAGCCTCCTTCCTCCAGGAGCACGCCTGTTTCTCTGTGTGTGAGGAGGTGTCTGCTGTAGTAAGGGGTGTTgctgctgctgTTTTCACAGGGAACATTCAAGAGCTGATGGGCTTCCTGGATCCCATATCCCAAATAATTAAGTCAACATGGTTATCCACCATTCCTGATTCAGATCCTGAAGTTGGGACTCACAGCTCACATCCAGGAAATCCTGGAGCAAAAAGTCAGTAACCACCTGAGTAA…
CUFF.7012.1	chr12:15716516-15719005	-	GTCTCAGCTTTTAAAGACGATTCCCCTTCCTTCCAGGTTGAAGAAAAATTTTGAAAAATACAAGGAGACGATCCTCTGGATTATGAGGAAACGTGAAAGTAAGAGCTCCTCTCCCCATTTTCCATCCAATCACCTGGTTCCCCCGGGTGCTTCTTGCCGTCTCCCACCTTCCCCCTTGTCCCTCAAGGAGGCAGAAATGCTCGTTCCCTCACTTGAGCATCCATTGGGCCAGTAAAGTCTCAGCTGCCAGGGACTAAAATACGGAGCAAGCCAAACACAGTCTGGGACTTCAAGGGGCTTATCCTTTGATTGTGATGAGGGTGGCAGGGAGGGCAGGAggcgaagataaacaggaaagcagggaatttgcacataaaatagttaatgctttggtgggaa…
CUFF.7011.2	chr12:15834333-15852303	+	gaggaatcaccgTGGTAAGGTGGGCAACGCTGCCTGATTCTCGGTAGAATGCTCATTTCCTAGTCGTGGCTGTAGGTGAGCAGGCTTATGTGATGGAGAGGAGTTTACCCACTCTGCTGACGGAAAACCAATGACCGTCGTGAGCTCGAGATGGCAGCGTCCTAAATCCTGATCTTTCATTCACACTGGCTCAATTTCTGAGCTTTGAGCAGATTCCAGAAGGTGAGCCGGAGGTGGCAGCCCGTTCCCGCAGAGCTCCTCGCCCATCACTTTTCACTTGCTGTGACCCCTGTATCCTTCGCGGCACCCGTAAGGTCCACATGGGTCTTATGCCTAGAGAGTGGAAGAATCTATAGAACCCCCACCC
CUFF.7011.1	chr12:15834333-15886076	+	gaggaatcaccgTGGTAAGGTGGGCAACGCTGCCTGATTCTCGGTAGAATGCTCATTTCCTAGTCGTGGCTGTAGGTGAGCAGGCTTATGTGATGGAGAGGAGTTTACCCACTCTGCTGACGGAAAACCAATGACCGTCGTGAGCTCGAGATGGCAGCGTCCTAAATCCTGATCTTTCATTCACACTGGCTCAATTTCTGAGCTTTGAGCAGATTCCAGAAGGTGAGCCGGAGGTGGCAGCCCGTTCCCGCAGAGCTCCTCGCCCATCACTTTTCACTTGCTGTGACCCCTGTATCCTTCGCGGCACCCGTAAGCTCTTTAAAAAATCCATCTCCTCCCACTGCAGTGGAAGACTTGTGACAACAGAGATTCTGCCCACCTTTTTCTCCATGGTAGATA…
CUFF.7014.3	chr12:15887863-15897398	+	ATGTAGATCTGAAAGTTTAGAGGGTGGACCTAGACTTCCAGGAGACCTTCCCTGAGTTTTGCTGGCTGCCTTGATCTTCTGTCATTGTTTGCAGGAAGCAGGATCACCAGctgcatcgtgtggcttgtgggcatcttagtttcccgagcaggaatcgaacccatgcttctggcattggaagcacagagtcttaaccgctggaccaccggggcattTTAGAAGTAAGGAAAGGAAGGAGGACTCTCCCAGGTGTCTGAGTGATGGGGCCAGGCCTCCGGGCCAGAGGGCCAGCTGCACCCTCCGAGTTTCTTGTGTCTGCTGCTGAATCATGGTTCTGAACTGTCCAGAGCAGAGGAATCCTTGCTGGATACAAAAGCACTCCACCCCGAGGGAAAACAC…
CUFF.7014.1	chr12:15887863-15905068	+	ATGTAGATCTGAAAGTTTAGAGGGTGGACCTAGACTTCCAGGAGACCTTCCCTGAGTTTTGCTGGCTGCCTTGATCTTCTGTCATTGTTTGCAGGAAGCAGGATCACCAGgtgctggcagaacttggaacatggttggtacccaagaaatattcctggagatgctgaatgagtgaCTCTTCcccattgagctctcaccctaatacagtccagccactcactatctggctgctgccaatctaaggcaagtcagcctcactgcctttctgggctaatgtggcagcctcttaactagttgtattgagttgaaaggtgacccccaaaagataggtctacatcctaacccctggaactgtaaatgtgactttctgtgagaaaagggtctttgcagatctaaata…
CUFF.7014.2	chr12:15887863-15905068	+	ATGTAGATCTGAAAGTTTAGAGGGTGGACCTAGACTTCCAGGAGACCTTCCCTGAGTTTTGCTGGCTGCCTTGATCTTCTGTCATTGTTTGCAGGAAGCAGGATCACCAGtgctggcagaacttggaacatggttggtacccaagaaatattcctggagatgctgaatgagtgaCTCTTCcccattgagctctcaccctaatacagtccagccactcactatctggctgctgccaatctaaggcaagtcagcctcactgcctttctgggctaatgtggcagcctcttaactagttgtattgagttgaaaggtgacccccaaaagataggtctacatcctaacccctggaactgtaaatgtgactttctgtgagaaaagggtctttgcagatctaaataa…
CUFF.7074.1	chr12:18958968-18962686	-	TGGCTCGAAGTCCCAAGTTGCGCACACTCGGCGAGGGCGATGAGGGTTTCGCATACATGAGGGTCCTGTTGATTGGGAACATTGGTCCCAGCAGTGTGTGTATTTGGATAGAATCCTCTTACAATAAAACATGCTGAGGTGTCTGTGCTGGATTTGTTGGTACTGGTGAAGTTTGGCAGAGACTGAATACCTGGCTTGTAGAAGAAAACCTACCTCACCCTCGGTCTTGCTCTGgcaaggaagctaaggcccttggaccagcaacatcagcatcatttaggag
CUFF.7105.1	chr12:19574414-19577640	-	ACCATGTGGAGAAAGGACTGAGACCAGAAGCAGAAAACAGACATTGTCCATACAGAGCAAAGTGCCAGACAACAGCTCGTTCTAGTAAAAGGCAATAAAGGCCACATGTGATGATCTCCTCAGTTCAAAACTTTACATCTGACTTACATGCCAGGTCTGATGACTTCTACTATCTTTTCATGACTTCTAAATTATGGAGggactctgttcactggatctaatcccctgaatctatccatcacctccactgtatattcaCCTCCACTGTTTGGCACTGTGGGGGAACATAAAGACCAGTAT
CUFF.7108.1	chr12:19621192-19649824	+	AGGGGCCGTGGGGACTGTGGGCCTGAGGGTCCATAGGTGACATTATCAGTCGGTAGACATTTATTCTACTGTTCGACGAAAACAAACAGGGGTACAGCTTAGGTGAAAAGAGAAACAGCTTATTGCCAGGGTCTAAACTCCTAACAACGGAATGTGTCTGGGAGCGTGTGTATGGATACACGTGTACTTTAGAGCAGCCCCGCctgtttgcagagctcttgctgtaagtcatcgctttacgggagctatcgcacttaagcctcaaaacaactttgtgaggcctatttctaacaggcttgtttatgtgcattcttactctatcctggactggaatcagaaaattggacaatgttgcaggttctgattgatgcaggcacactgaccagccaaagtgagaac…
CUFF.7159.1	chr12:21733937-21745245	+	agagggctgaacactccatccgcagagcatgttctgagtatacctattgtgaagaagcctgtagcttagttctgtctaggccagaatgaaggtcacctcatattttattgtctccaattagcttcagttttatcccaaagaatacctccagcccctcgcctttgaggaagtggatttgagacttcatcttctcgctcggccaccttAGATAACTCAGTTGAACTGACATCAGGAGCCTATGATGATACCATCTATGAAAGCATTTCCCCGAGTACATGGACAACAGC
CUFF.7159.2	chr12:21737167-21746618	+	TGGTTTTGTTTCACTTTCTGGTAGCAAGTGGGTAATTTTTTTAAAGAGTCCTGTgcttgagctccagtcctttggccacctgatgcaaagaactgactcattggaaaaaatcctgatgctgggaatgattgaaggcaggagaagaaggggacgacagaggatgagatggttggatggcataactgactggatggacatgaattcgagaaagctctggcagtttgtgatagacagggaagcctgacatgctgcagtccatggtgtcgcaaaaattcgaacatgactgagcaactgaactgaACTGTGCTTGAGCTAAACTTAAATTTTATTGAACACACACACAAAATGTTTTCCCCTATTTTTTGAGCTAAAATTCTAAGGGCAAATGCACAATGCGTG…
CUFF.7178.1	chr12:22394740-22428099	+	GTGTAGGGGTAGTTTTTCTTTTTTCTGGAACATGTGCCAATGGAAAAACATGTGCTGATCATGTTAAATCTCTTGCCTGGTGCTTTGGCTTCTTTCTTCCAGGCTTGAGAGTGGTTGTGATCACCAGGTTACACCTTCTTACTTCCTAGGATCCTTCTGAACTAGGCATGCACCTTCAGCTGGGTTGTACCTATCAACCATTACCCAGCTCTTACTCCAGGACTCCGAACACTTTTTGTGGAACAGACTTTGCTGTGTCCGGTCCCTGGTGCCACCATCCTCTGCACAGCATCCTGTACCTGTAGATTCTGCAGAAGCTCCTGCTTCATTTCCTGCTGGAATGGAATGATTCAGGATCCCCCACTGTCCATCATCCCTGAGGGGGAGCAGTACTGAAGA…
CUFF.7178.2	chr12:22395730-22428099	+	CATTATCATGGGACTTCCTTTGAACAACCACAAGCCTCAGTGAAGTGGCCTGGAGGCTGCCGCCTATGGGATGGCTTAGAAGTCAATGCCCCAGCCCAAGTTTAGACAGTTGTACCTATCAACCATTACCCAGCTCTTACTCCAGGACTCCGAACACTTTTTGTGGAACAGACTTTGCTGTGTCCGGTCCCTGGTGCCACCATCCTCTGCACAGCATCCTGTACCTGTAGATTCTGCAGAAGCTCCTGCTTCATTTCCTGCTGGAATGGAATGATTCAGGATCCCCCACTGTCCATCATCCCTGAGGGGGAGCAGTACTGAAGAAGAGCTTCTCATGTTCCCCTTGACTCACCCCTATGGACTTTGCTGGACTAAAAGAAGGTTGGCATTCATGCACTG…
CUFF.7180.1	chr12:22398226-22399466	+	AGACCAAGAGTCTACAGACTAAGGCAGACTTGCGTTGACCCAGTGAAGCAAGAACCATCAATAAGTAACCTGTTACCTGGGAATGGAGCAACAATTCTTTCATAAATGAATGTCAATGAGGTGTCAAAATGATTAATCCAATTACCTCCTCTGTTTCTGTGTATTCTCCTGGGATCAAGACATTCTGCTCTTATCGTATACACAATCCACGACATTTTGGTTAAAGTTGCAAGAAGGCTTCCTCTAGAACTCTTCCCCTACTCCAGAGAATTATTAAAAGAGTTTTC
CUFF.7178.3	chr12:22416054-22428099	+	ATTAGGGAGAATACAGTTTGGTGCTTGGATTTTCAAGAAGTCAGCTTTTGGAGTCAGTCTCTAAGTTTTTCCATGCAGAAAATTTTACCTTTCATCAAGGTCCCTGGTGCCACCATCCTCTGCACAGCATCCTGTACCTGTAGATTCTGCAGAAGCTCCTGCTTCATTTCCTGCTGGAATGGAATGATTCAGGATCCCCCACTGTCCATCATCCCTGAGGGGGAGCAGTACTGAAGAAGAGCTTCTCATGTTCCCCTTGACTCACCCCTATGGACTTTGCTGGACTAAAAGAAGGTTGGCATTCATGCACTGTAATTTCATTGACACCAAAAAAAGCCTTTCCTTCACTCCCCTCACTTCCCCCAAACCCCAAGAAAACAAAAACAAACCCTCCCCTTT…
CUFF.7270.1	chr12:29738573-29777676	-	ATGGAGCAAGGCAGGAGCGCACGAAGGCAGAGGATGGGGCCCAGGTTAAATGCGAGGAAGGAAAAGGAGAAATGGAGACCGCAGGAAACAGAGCTTTTGCTTTGGTTTCTGAAGATGTGAAGAAAGAGGCCAGACAGTCTAAGAATTTGGAGAAAAGTGATATATCAAAGAAAAATGACATAGATTTAAAAGAAATTGTATTTGTCATCCAGAGTCAAAGTAATTCTTTTCATGTGAAGAAGGCAGAACAGTTAAAACAAAGCATCCTAAAGCAATCTACAGATCTTACACAGATGGAAGGGTAACGTGCAGTTAGAGAGCCTGACTATTTAAAGAGGCGCATGAACAAAAGCCAAGTGGAGGTGAGGCTGACGGAAGCCCACGAGGAGAGTGTGTGAC…
CUFF.7382.1	chr12:35519163-35587212	-	AAGAAGGAGGAGGAGAGTGAGACGTGAAGGAAGCGTCTGGAGGAGAAGGACCCAGGAAACGGATTCTTGGCAACGTCCTCCATCGGATAAGCATCATCGGAATGAAGCGCTCTGATACCATCTCAGATACGAGCAGCTCTGTGTCGTTGTGGAGACGCATAAAGTGGTCCAGGTCCTTGAAAACATGGTACTTGGAAGTCATCTGATTTCTGGATTAAATTGTAAGGAACCCATGTTTTGCTGTAAATGTGATGTGGAAGAAAAAAATTCAAAGGTATCTTGCGGCTCAACTGAAACCAAACACATCAACTATGGAGATAATTCACCTCTTAAAACAGTGTCTTGACTCTGGCCCTTTCCAAGCCGTCTT
CUFF.7528.1	chr12:54224519-54229429	+	ggccctgggtgaagtctggatggtaacttgagaagacgtgtgcaatgggttataactgcctggctacacaaaaggCCTCAAGTTGGCACAGTCAGTTACCTCCGAAAAGGGACAGACTCAAAGGTCTTTGTTGTCAGCTCTACCCTAAATCACATGCCTGGGAAGGTAGCCCCCTGGATAGTACTTATGGCCCCTAATTGAAACTCAGTTCTCTAGAAGTTCACTACTGAGTGGATGTGGGAAGAGATAACAGGTGGACACATTTTTGACCTTGGCATATACTGGCATTCATGAAGAAATCAGCGCCTCCTCCCAGGCACATCTTGGTGACTTGCAGAGTGACTTGGCATCATGTCTGACCCTTGGAGGGAGGAGGAGAAGGATGAAGAAAGGCTAAAA…
CUFF.7552.2	chr12:55789596-55858484	+	actgactcatttgaaaagaccctgatgctgggaaagattgagggtgagaggaaaaggggacaacagagaatgagatggttggatggcatcactgacttgatggacatgagtttgagtaaactccaggagttggtgatagacagggaggcctggtgtgctgcagtccacgggattgcaaaaagttggagatgactgagcgactgaactgaactgaactggactgaTTTTCTGGTATTAACTATTGGTATGGAAGgtgtaaagtcaaatatgctgaatggctctccatcaacaaattaaagaggcaaatataaaatccagatttttcagattctgaaagcacaagaaagttacctggTGGAAAAAACGTGAAGCGATCTCCAGTGGAGAGGGACTCGGTCT…
CUFF.7564.1	chr12:56622119-56623635	+	aagcgagcagatgtcagcatgtgtgctgttgaagggttagtggtcgcattctaggtacctgcttagctgcaaccaggcacagcctgactcccagtcctggggaaacagctcgttgttgaggccagttgctgcttggtggaatgagagtcttcagtggcaataattaaaacaaccttgacagggaatgatgatggtgttttctgcagaagagttatacaacctgccttcttttcaaaagatctttcagaatgtgaagatgactggggatgcTTATTAAGGGAT
CUFF.7564.2	chr12:56622120-56626091	+	agcgagcagatgtcagcatgtgtgctgttgaagggttagtggtcgcattctaggtacctgcttagctgcaaccaggcacagcctgactcccagtcctggggaaacagctcgttgttgaggccagttgctgcttggtggaatgagagtcttcagtggcaataattaaaacaaccttgacagGGGAAAATGTGCCTGTCATTCTAAATAAGGAAAAAGAAAACTTTTCCCTGTTTTGGGGAGCTCAGAAAAATGAAAATTTAGTGAGGTAGCCAACTCTTAAGGAGTATTTATAAATATGACTGTTTTCAAAGTAAATGAAGAGGTGGATTAGGGATATTAAGCTGGTTTTGCTCTACTGCAATTGAGACAG
CUFF.7582.1	chr12:58860669-58928755	+	gggagggcggggcataatctaggtttctgaagtttttgtccaggatggaaagctgggatctgtagggtttctttttcccctctcttggttgctgtcttaggagttttctgatgcttggagctggtgATATTTGAAAGTGCTGTCACCATCTTAAAATTTTAGAAGAGGATGTGGCCAAGACAGTGAAGGCACAAAGAAGAAATATGCAGAGAGCCATGGTCCTTGAGGGTGTTGCCAGGCTGAGAATCCGTCCTGCTTCTGCCCGTCTCTAAAGACTCCAGTATCAACCAGATTCTTACTGGGAAGTACCAGCCAGATAGTGGAAGCCGAAGTACCAGCATGTGCCTTTTCTACATCAGGTGAAAATTGTACATATTTCCAGAAAGCAAGTAAGATACT…
CUFF.7588.1	chr12:60492249-60575392	+	GAAGCAAAGATGGAAAGAGCAAACCTATATCTATAAATAGCTGCAGGAATGCAATTCCCAACACACAGCCTCCAGGTTCAAGGCACCCACAGGAGAAGCCGAAGGCAACTTGAGCGGGAGGAAGCTTACAGTTAGGTATGAATGATAAAGCATTCTGTCTgttgctgacaaccatctagtgacaataagggaagacaacctgagcaagatgctgaaaaggaaaggggagagcagctaagagaatctcagaacaaagccaaagaatggagtgagtcctgcctgaagctagtgctacttctgacccctcagatgagtgtcgagaccatctacatgtgcccatctcccatctgcatatcttcATGGCAAAGGCTGCTT
CUFF.7664.1	chr12:67793452-67936141	-	cttttgaattgtggtgctggagaagagtcttaagagtcccttggacttcaaggagatctagccagtccatcctaaaggaaatcagtcctgaatgctcattggaaggactgatgctgaagctgcaatactttccacctgatgggaagagctgactcattggaaaagatgcttttgctgggaaagattaagagcaggaggagaagagggcagacagaggatgagatggttggatgacatcaccaagtcaatggacatgaatttgggcaaactccaggaaacagtgaggcactaggagtcctggcctgctgaagcccttggggttgcaaagagtcggacacaactcagcgactgaacAATAACAAAGGGCACAGAAGCACTAAGGCtgcagatgtaattaag…
CUFF.7685.1	chr12:68033873-68060258	-	GGGGTGCGGAATTAATTCTGCAGAAAGCAGGTGAATTAACCTGGCAAATAAGATGTGAGTGCGAGTTCTCTGGACGCGACTTGGAACTCCTTGGAACTGTCTGAAACGACTTGGAACCGCTACTCCTAAAAGAGCGTCACGTACTGAAAAGACCATTGCCTTTTCCCTGGACGCTGTCGTGAGTGGATGTGAAGTCAGAACAGTGGTAGTGGTTTAACAGCCAGCCTGAGGATACAGCCGGAGCAGACAGGAGGGTAGAGCCAGGAAGGATAGTAGGGATCCAAGATAGAATCATGGAGTTAACCATAACCAGAATCGCCTGACCTCCAGACTTGGGAAACATATACTGTGTTAGCACTAATCCAATGAGGAAGAGCGTGAGGATAATTTGAAGAGCAT…
CUFF.7685.2	chr12:68043958-68060258	-	GGGGTGCGGAATTAATTCTGCAGAAAGCAGGTGAATTAACCTGGCAAATAAGATGTGAGTGCGAGTTCTCTGGACGCGACTTGGAACTCCTTGGAACTGTCTGAAACGACTTGGAACCGCTACTCCTAAAAGAGCGTCACGTACTGAAAAGACCATTGCCTTTTCCCTGGACGCTGTCGTGAGTGGATGTGAAGTCAGAACAGTGGTAGTGGTTTAACAGCCAGCCTGAGGATACAGCCGGAGCAGACAGGAGGGTAGAGCCAGGAAGGATAGTAGGGATCCAAGATAGAATCATGGAGTTAACCATAACCAGAATCGCCTGACCTCCAGCCAATAATGAAGAGGTTCAATAAGATAATGACAAGGATCCTAATCGTAGAAATTTACACAGtgacatct…
CUFF.7776.1	chr12:76026462-76028128	+	taatacgctgctgaatagggtgttgttagagttaaaAGTAAGGGGAGTTCCCCAGAAATATGCATGACCTGTGTTCTGTAACATATGCCACTGTTACTTGTCTAGGCCCTAGCTCATGATGAAAAAAAACATTAGACAGCCTCTCTCCCCTCAGATTTCCCTTTCCCAGTCTAAGAGGGCAGCAACAAGCTCACAGAGGTTCCCTGCACAATGCAGCATGTAAGATGCCAGAAAGCTGCCCCCATTAACACCATGCATTCATCTTCCAAAATCATCTGAGTTTCTCTAACTTTCTGTTACTTTTCATTAGGTCTTGCAACTCTACAAACATAATCTGTGCTAAACCCTGTTGTTGTCCgaggtcaaaaaatctgttggagtttggaggaaacaaaggtt…
CUFF.7771.3	chr12:76073979-76144188	+	GGCTTGGTTCCTGCTTTTGACGACGTCCCGATGGCTCGCTGTGTATCTGGATGTCATCTGTGCCATCTGTGTCACTGTTGTTGCCTTTGGGGCCCTGATTCTGGTAGAAAGCGTACTTCAAAAGGAGACAGCCAGATATCACTCACAGTGACCATGTGGTTATGAATGTTTCCAGTGGACAGCCCTCAGCCTTCACAATTTTTGAGTCAACACTGTGATTCTCCCATGAGTTCATGTCTATTCCAAAGGCCTTTTTCCAATAGGTTTTGCACTGCATAAACTATATTCTACTTTTTTTTTTTTACACCAGCAACAAATATTTACACATTACAAAATGGGAGATCTCCAACCTCAGTGATTTCAATCTCTTGAAAAAGGATTTATGATGTTTATTTAAAT…
CUFF.7808.1	chr12:77382417-77427103	+	GGCTCCCGCTAAATAGGGAAAACAAATCCTCAGAAAGCAGGGTCTATTTAAGGGAGAAAAAGGCAGCACGCTGGAGTAAGATTTTGCTACGATTATCTCATCATCTCTTTTCATGTGCGGTGCCACTGGCAAAACTCTTTTTTAAAGAAGATTCAGAAAAATGATTGGCACTCGGTATTTTACCTGTTTTATCTTAACCATCAAGGAATAGTATagtgaaagtgactg
CUFF.7922.1	chr12:83472911-83493877	+	ACACTGGCTGACAAAGCAAGAGACTTGATTGGGAGAAGGGTGTCCGGGCAGAGAGCAACAGGGAGGCTGCAGTGTGATGCAGTGGGGATCCATGATCTGATCCACTCAGGGCTCTCCCTGTGGCTATGAGGAAGCCACTTCTCTGAACCACAGTGTCCTGAGCTCTCAAGAAGGAGGAAAAGGCTTGAATGCCAGTTGCTCTGCATCACGGCTGTCGAACAGCTGTCATCAGCGGACATTCCGAAGGCATACATCTATTTCTCCCGCCCTTACTTTGAGTTCCACTTTGCACTATTCTGCTGTTAATTATTCCCCTC
CUFF.7925.1	chr12:83552527-83554495	-	AAAGAGACAAGAAGAGgatcattctgaccagtatataaagaaagagttctcagtagaagagaaaagacatacgaaaagccagtgcactgactcctgcagtcattaaggagagagatgatagaggcttgaagcgagcgtgttggcatttacagccgaggggtgtggaccttgggggaaggatctgaaggatTTGCTACTCTGGTGGGACTCTCCCTATGGGACGAATGATCATTCAGcactgacttaaggcttggctatgtgactagctgtggccaatgaactgtgagcagaagtggcgagttattcaccaaacagaaactttcaaatccattgcatgctctgcattgcactttgccttcagggtcaagatcccagctgggactcactgcttcagcacaa…
CUFF.7924.1	chr12:83674248-83703470	+	GAAAGAGAGAGGTGCGTGGTCAGGGAGCAGCCCCATGTGCGGGTGAAACATCTCTGAAAAACTCCGTCAAAAGGACCAAATGAGCATCTCACGTGGAGATGGAAGAGGGATGTGGTCCAGACGCTGTGGGCAGCGTCCCTAGTCACGGTGTCCATAGGCTGCGACCCAGAAGCACAATTTTATGGGCTCttcactgatgtatccccaggccccagaatgctgcctaggttacaAATAAAGTTGATTAAAAGACAGTCGCACAATATGGCACCCACCTTGTGAAGTACGACATTTCCAACCACTGTCAGAAACGTGGAAGTTT
CUFF.7927.1	chr12:83715895-83726563	+	AAAATAGCTGAGTCAGAACACAGCTGGTGGAAAAGAAAATGGCATGAACCCTCTAAATCAGCATGGTAGAGAAAATGCCATGCTGTCCTGGAGCTAGCAAGCCATGTGAAAAATGGAAAAAGCCGGGCAGCATACACGCTTGCATCATGGTTCCTTCCCATCGCCCATCAAGGAAAGTTAACTGTCACTGCAGTGGGAGCGTGGATTAATGTTGAACTTACTGCAGCCTGACACCCCCATCTATCTTCAGCTGTCCCGAGAGCGTGAGGCATGCTGAATGGAAGATAGCTCAAAAATGATGCAACTCACTCAAGCCACAAAGAACTTCTTATCCAGGCAGCATTTGGCCGAAGCCCCAGGGCTCTCTTGGATATGAGATGGGGAAAAAAATTAAATAAA…
CUFF.7930.1	chr12:83817758-83918824	+	GTCGGGGGATCTGCTCTATTCGACCTCTGCAGGGAGAATCATCCGACTTTCTCAAGACCTGAAGTTCTCTTGCATCTTGATGTTATGTGACATCATCATCACTTCAAGTATTTATTCCTAGAGGAGTTGCCAGGGACAACAAGAAATCATCAGTTTCATGTATTATAAACTTAAGTGAGAAGAGCTTAGAAGTTAATGGACAGCTACGCTTAAGGATAACAGTCACACGCTCCCATGTTAATTTCCAAATGTTTTCTAACATGCCCTCCACACTCAA
CUFF.7938.1	chr12:85069136-85329481	-	gaagatggcggaagggcggtgagagactcaacatggctgactttcaagatggaggaagaggctgggcgtcacggggagcaggtggccctgagaagctgggagagctataccctacaacatatgggttcttagttccccgaccagggaccgaacccctgccctgctgccttggaagcagagtcttaaccactggactatgagACATGTTTATGTTGCTAATCGATGGGACTCCGAAATCATAAGGAAAAGGAATATTCAAAGGTAGCCAGTTTTATAGAGCCTGGAATGGATGTCCTGGAGCATCATCACTCTCTCCTATTTGATACGTCGGTCACACA
CUFF.7938.2	chr12:85124418-85329481	-	gaagatggcggaagggcggtgagagactcaacatggctgactttcaagatggaggaagaggctgggcgtcacggggagcaggtggccctgagaagctgggagaATAAGCTCAGCTTGCGCACTGAGAACCCGTTCGGCCATCCCTGTGAAGAGGTTCTGCCGTCTGGTCTTGAGTCTGCCTGAGAAGAGCGGTGCTGAAGCATCCCTCACAGGTGTACAACGGATGCTCCATCATTCTCAGAGATTCCTATTTTGAAAATACACTTTGTCTCCTTTGAGTTAAAAAGTTGGTGCCAAAACCCATGTTTGCAGAGAGTATGCACTTAACCATTTCATGTTACTGTTTGGATAGTAAACTAATTCCAGAAAATTACTGTCATAAGTGTGCATTTTAGGAAG…
CUFF.7941.1	chr12:85360592-85362368	+	TTTCGGGAGTTCGAACATTTGCAGTAGCTACAAGATTAAGAAAATGCATGGGCTTTGTAACTTTTGCTGAGACGTATCTTTTGGTGGAAAGTGGGAAGAGAGGCAAGAGAAATGATGTTTATGTTTCTCTTCCCAGGTCAAGATCAAGTTTGTCTAGGCGGACAGTGAAGATGAAGGGGGAGGAGCAGAGAAAGTAGAAGTGTGTAGGACAAAGGAGACTTCTGTTCATCCCCTTAATCATTCGTAAAGGGGCAGAACTCAGCATTCAGATTTACTCAATTCATTACATCCTAAAATGTTTATCTTGAATTAAAACTGAAAGTTAGTACCTGTTTGAACACACCTGGCAGCTTTTATGATACAATGGATGGTAAACAAGACCTTGTTTTGACTTTCCTA…
CUFF.7942.1	chr12:85360592-85362929	-	AGCTCTGTTATTTTTGCACGTTCAGATGCATCCGCAGCTGGTTTTATTTATCTCAGCCGTATATGCCCGTATTTGTTGTAATTACTAGTCTCGGATGTACTTAAAGATAAATATCTCAAATGCCTATCCGGCTAAATTAAATTAAGGAAATCACACTTTTCACCCGCACCCACTTTGGCCCTGCTCTGCTGTGGATAATAGCAACGATTTAAAAGTTTGTGCCTCATTTCATCTCCCCCATCAGAAGTGCTTCCAAAGAAGTCCTGGGTTTCCTATCTCTTCCAACTCAATATGCTCCATAACGGCATTGTTCCCTCTAGATTCAACACAGCAAGAAGGATTTGTTTCAGAGCTTCTTACCTGCTCATAAAATGCTTTTAAATGCATTTTGACGGCTGG…
CUFF.8064.1	chr13:4338452-4340035	-	tgagagccCGTGTATTAGTGTATAGTAACAAAGAAAGGAAATGGTTAGTGCCAAGTGAGTGACATGCGGCTTCTAAGCCCCATCCGTATAGGAGTTCACTGGATTTGGGCCACTAGGGAGAGCTCTACATCAGATCTCCAGGCATTTAGATCCCAGAGGTCAGGGACCCCTGAAGAAGTAGAGGGAAATAATCCCACATTGGATCACAGCCCGTTTCATAATTTCAAGAAGAGATGGAAAGCTGCATGATACGGTTGTTCCAATATCCAAGCCAAAGCAACAAATGACCTTCAGAATCCCAGGACATAGTAAGTGGACAAGGGGAACT
CUFF.8064.2	chr13:4339387-4340035	-	tgagagccCGTGTATTAGTGTATAGTAACAAAGAAAGGAAATGGTTAGTGCCAAGTGAGTGACATGCGGCTTCTAAGCCCCATCCGTATAGGAGTTCACTGGATTTGGGCCACTAGGGAGAGCTCTACATCAGATCTCCAGGCATTTAGATCCCAGAGGTCAGGGACCCCTGAAGAAGTAGAGGGAAATAATCCCACATTGGATCACAGCCCGTTTCATAATTTCAAGAAGAGATGGAAAGCTGCATGATACGGTTGTTCCAATATCCAAGCCAAAGCAACAAATGACCTTCAGAATCCCAGGTACCTTCAGGAAGTTGGAAACAATATCAGTGGCAGA
CUFF.8081.1	chr13:5734045-5735603	+	GGCTGGCACTCCAGAGGACCTTCAGGGGAGCCTATGCCAGGAAGGCAGAGATACGAAGAAGCAACAGTCTCCCCTGGAACCGGAAGAGGTTCCTGAAGTCCCTGTGAGGTGGACACACTGGAGGCAGAAACGCGGAAGAACAACCTTTTATCTGTAATTGAAGTCAGCTAGCTCCCCAGCGCGCCCTCACCCGCGTCTAGGATGACTCTGGCCCTCAGGGTTCACATGTAACATCGGTGAGGCAAATAGGAAGGTGATTCCGACTCTTGAGGGCACTCCTTTCTCAGCAAGACTGTTGTCTGCCTCTACAGGGCTCCTTCCTCTCTTCGTTTCGAGGCGGCTGCGCATCCGGAATGAGAAGAAGGGATGCAGTCCGTGCTTCTCGAGTGCCCACCGTCT…
CUFF.8090.1	chr13:7007262-7011166	-	CATGATTGGGGGTGCGAGCGCTCCCAGGAAGAGAAAATCAAAGGATGAACGGTGTGAATTTCAGGCAGAAAAGCTGCCTTCTCAGGAGGTGGTGGGGGATGCTTGCTTGTTCTTAGAACTCAGGAAGACAGCTGTGAGATGGTGACCACAGGCCTGGCACCCACTGGTGGTGGAGGCTTTCTCAGCGCAGGCTGGGAGGAAGGAACCAGATCTCTGGGGGGAAGCCCGCATTGTTGAAGACACCGATGGTGAGGTTGGCCACCTTCTGCTGGCAAGTGATGGTGATCACACCCCTTCAGGTAGCAGGAACAGAGCAGACATCCATGGCTGTATGTTACAGCAAGCATGAACGCGCAATGCTCCTTTGCAGGGAAAGACAAAGTCCTGGCAGAGGGAAGT…
CUFF.8128.1	chr13:8884141-8885328	+	TCTGCCAGCTGCAAAAAAGTTCAAGACACTGAAGAGCCCTGGAAAATAAACTTCAAGCCATCTTGAAGTCCTGGCTTGTGTTCTGAGTTTCCACTCCTGGTGATGTCTGTGGATATTTCCTTGGCTTTCCGAGGGACCCTTTGTTCGGAGCATCCAAGGGCATCACTGGTTTCCCCACCAGTGTCCACACGGAGTGGCAGATGAGAGGGCGTCATCAGGATCTGTTGGGACCAACCGTGGCTTCTGGGCTCACCGGTTCGTAActgctgtgaactccctccactttcgggctgagtctggcctggctctccccaggggtctccagccttctccactgaggctgttttttccttccacataccatgtaccgcaggacttagaggaaaagaaggtgaccgc…
CUFF.8156.1	chr13:10551475-10575682	+	CTGGGCAGGATGGGACAGAGACTTGGCCGGAGAACATTTCTTTCTAACCCAGAGTGAAAGAAGTCTCTCAAAGGGAAGACGAACGACAAGATAAGTAGGTGGCTCTACTTGTCAAAAGTAAACAGCACGTTTCTGGagtactttgcaaacaataatgcttatacaagtcacctggggaaacttgtgaactggcagattatgattggacagctctggtgtgaaacctgagatactgcttttccagcaaactctgtgggtgcagctggtctcacgTGGCCTAATTTATGGGGCCCGGGGCTGGAGGTTGGGCTCAATTGGGATTACTGGGAAGCCTGTGCTTCTTTCTCTTTCTTAGCCTCGAAAAGTTAGCCGAGGTTTCTTAGTTGGGCGAGGCAGCCT…
CUFF.8159.1	chr13:10709065-10716114	+	GATGTCGCCAGGGAAGAGGAAGCTTCCAGCTCCAGCTTACAGGGATGCAGTTAAAGTCTCATGACCTTGGTCAAGGAATCTAATTGTCTTCCCAGCtgtcatgGTGTCCTAGTAGAGAGGGATTTGCACCCAGCCcaaggagatccaaccagtccattctaaaggagatcagtcctgggatttctttggaaggaatgatgctaaagctgaaactccagtactttggccacctcatgtgaagagttgactcattggaaaagactctaatgctgggaagggattgggggcaggaggaaaaggggacgacagaggatgagatggctggaaggcatcaccgactcgatggacgtgagtttgagtgaactctgggagttggtgatgggtagggaggcctggcat…
CUFF.8208.1	chr13:11211289-11225842	+	GCACTGGGAGCATCTCTGAGAGCCTTCCACAGAAGTATGTGGATCATTTATCTGGAGCTGCTGGTCAAAGAGGAAAAGAAGACATTAAATGGACAAGTAGAAGGTCAAAGCACAGATTAATGACGTGAGCTACCTGAATGACTTAGTCATCTGAAAGTGCTTCCGAGGATGGTGATGTCTTTACTCTAAGAATTCCACGTTGCAAGTAGAACCACTTGGCTTGAGATTGTGTTAGCTTGTTGAAAATTTGGGATGCAATTCTTTTGTGTGAAAGATAAATGGAACTTTAAAAAAGCCACTGTGAACTACTCAGAGGAGAAATTAAAAAACTGGAAAATAAGGTTGGTGAGCTACAGAAAGAACTGTCTGAAAGAAAAGAAGTGAATCACAGTTAGGGCA…
CUFF.8208.2	chr13:11211289-11225842	+	GCACTGGGAGCATCTCTGAGAGCCTTCCACAGAAGTATGTGGATCATTTATCTGGAGCTGCTGGTCAAAGAGGAAAAGAAGACATTAAATGGACAAGTAGAAGGTCAAAGCACAGATTAATGACGTGAGCTACCTGAATGACTTAGTCATCTGAAAGTGCTTCCGAGGATGGTGATGTCTTTACTCTAAGAATTCCACGTTGCAAGTAGAACCACTTGGCTTGAGATTGTGTTAGCTTGTTGAAAATTTGGGATGCAATTCTTTTGTGTGAAAGATAAATGGAACTTTAAAAAAGCCACTGTGAACTACTCAGAGGAGAAATTAAAAAACTGGAAAATAAGGTTGGTGAGCTACAGAAAGAACTGTCTGAAAGAAAAGAAGTGAATCACAGTTAGGGCA…
CUFF.8208.3	chr13:11211291-11225842	+	ACTGGGAGCATCTCTGAGAGCCTTCCACAGAAGTATGTGGATCATTTATCTGGAGCTGCTGGTCAAAGAGGAAAAGAAGACATTAAATGGACAAGTAGAAGGTCAAAGCACAGATTAATGACGTGAGCTACCTGAATGACTTAGTCATCTGAAAGTGCTTCCGAGGATGGTGATGTCTTTACTCTAAGAATTCCACGTTGCAAGTAGAACCACTTGGCTTGAGGTATAAAGATTGTGTTAGCTTGTTGAAAATTTGGGATGCAATTCTTTTGTGTGAAAGATAAATGGAACTTTAAAAAAGCCACTGTGAACTACTCAGAGGAGAAATTAAAAAACTGGAAAATAAGGTTGGTGAGCTACAGAAAGAACTGTCTGAAAGAAAAGAAGTGAATCACAGTT…
CUFF.8244.3	chr13:13022092-13037355	-	CAGAATGCACTGCACAATATTAAAACTTTACCTGGGGGTCAGAAAGGACCACAAAAGAGCAAAGAGCAGGCTCCCCAGAAAACTCACCTCCTTCCCTGGAAGATCCATGGAGTATGTTCTGGGATATTCAGTTCACGCATCATGCCCTTCTCACGTGGAGACTGTATCGTCATTTCTTCAGGAGAGCATATATTTAAGTACATACCAGGAAACTGTGCCAGATATTTTGCATTAAGTGTTGCATGGGGTCCAGGGTACCGCTGATGAACTGTCAACAAGTCGTGTGGATTAGGAAAGAGAAAATCCGTTGGTATCTCCTCATTCCATCCTGCATCCTGAGTGTGAAGTCAGACCCATAGTGGGAACCCTGGAAGGATTAGGTTTCTAGCAAGTTTTGGT…
CUFF.8254.2	chr13:13242789-13246838	-	TTGCCAGGAGTGGGGATGAAAGGTCTGTGTCCATTTCAGGCTTGGAATATACACAGTTGTCTCTTATCAGGCAAGAAATGTGATAGTGAATCTAAGCTACAATTAATCGAGCGAAAAAGGGACTGCTCTCCTTGAGGAGGCTTCGGTTTTTGCTTTGGGCTGGCAGATTAGGCCGTCATGAAGAGTTAGCTATTTCTCAGTGTCATATTTGTTCTACAAAACTGCAGAAGAGAGGCTTTGTAAAGTCCAAATGATTTCCAGCTCATAcagttcagtcgctcagtcatgtccgactctttgcgaccccatgaatcgcagcacgccaggcctccctgtccatcaccagctcccggagttgactcagactcacgtccatcgagtcagtgatgccgtccagcc…
CUFF.8254.1	chr13:13242789-13247772	-	GGGCCGCCTGCTAGTTCCCGACAGAATAGGAGGCTTCGGTTTTTGCTTTGGGCTGGCAGATTAGGCCGTCATGAAGAGTTAGCTATTTCTCAGTGTCATATTTGTTCTACAAAACTGCAGAAGAGAGGCTTTGTAAAGTCCAAATGATTTCCAGCTCATAcagttcagtcgctcagtcatgtccgactctttgcgaccccatgaatcgcagcacgccaggcctccctgtccatcaccagctcccggagttgactcagactcacgtccatcgagtcagtgatgccgtccagccatctc
CUFF.8280.1	chr13:14477479-14589615	+	aggagctcagcataattgactgttcttaagactgagtgatcaagaaaaatgaaaagacattaagtaccaagggacagcactacggattttacagatacagGTCATTAAAATCCAAACTCTAAGTTACAGAGGACAACAGCCCCCTCCAGGGAGCTACAGCCTCAATGTTATTATATTATCTACAATGAAACTGCATGGTGAATATAAGTACCCCACTGC
CUFF.8306.2	chr13:16997381-16999248	+	tgcgatggggagatggttctggatggtcaggtgggtccaatgtaattacaagcatctttgtagagagagactagtcagggttagggaaggagttgtgatgatgagagcagagacatgggtgggtgtaaggtgtatttcaagacataacactgcaggagacgtgaatcaaggaatacgatgacttctagaagatggaaaaggaacaacttttaaattacacggcaggatctggcagccatgagaatcgttgcttctgccatgatccagcatcaggaggccgccaGCCCAGGGATAAAAGTGGCCTGCATGCTCTCTGGACCCAGAATCATACTACCTCTGCTATGACCCAAACAAAAAGGAGGctccttgctcatc
CUFF.8311.1	chr13:17033003-17034178	-	GGAAGTGAACACGACAAGGCGGAGGGTGGTGACGAGAGTCCTCCCTGGAAGTTTACATTTTAAAAGCTTACAAGAAAAATCACAGAGGGCCGAAACAAAGGCTGGCCATGGGGACAGGTCGCTCTTGAAATCAGAGAAAAGTTTATGAGGGGGGGGGAAAAACCCCAAACAAACCAACTTAATTTAGACTTAATTGCTAACTTGGAGGAGTTCCACAGCTGAGGCTTTGAAGGTTTTTAAGAAGCTCTTCCTATGCCGCATCTTTAAATATATGTACGTTCAATCAACATGAGAAAGACTAAGAAGAGTCTGCCGCAGACACCTGCTTCAAACAATAGCGCTAATCTCCGAGGGGTTCTAAACAGCCGCGCACCAACTTCAGAAGAAAGGACGGTGGTG…
CUFF.8387.2	chr13:20226365-20227921	-	GAGAGACAGAGCTTCAGGGCTGACTGACCTGCAGGGGGTTTTGTGTGTCTATGAACAGAAAACACCACACACTGGAGGACCATGAAGTGCTCCAGCCCTGCTGGCATAGCCAGACCACCTCAGACAACACACGCCACGAAATCCAACTGCACCTCAGTCCCACCAAGGGGAAGTCCAGCTCTCCTGCCTCTCAGTGGAGAAGTGTAATGTACCCTCGGCCCTTGGATCCAGTTTATGAAACTTGGAAGATTTGAAAGTCAAACATAAGGAGCAGAGAAATTGTTCCAAAAGTAAGGCTGGAGATGGGGCAGCAAAGAGTACCTGAGTCATGCCGGAGAAAGGAAATGAAAGGGACAACAGGCAACACCGAACAAAGGCAGAAGAGACACAGGATGGTGA…
CUFF.8387.3	chr13:20226365-20228398	-	GAGCCGGCCTAAGCCACGAGGAGAATCTGACCCCAGAGCTATCAGAAGTCACTGGGGGTTTTGTGTGTCTATGAACAGAAAACACCACACACTGGAGGACCATGAAGTGCTCCAGCCCTGCTGGCATAGCCAGACCACCTCAGACAACACACGCCACGAAATCCAACTGCACCTCAGTCCCACCAAGGGGAAGTCCAGCTCTCCTGCCTCTCAGTGGAGAAGTGTAATGTACCCTCGGCCCTTGGATCCAGTTTATGAAACTTGGAAGATTTGAAAGTCAAACATAAGGAGCAGAGAAATTGTTCCAAAAGTAAGGCTGGAGATGGGGCAGCAAAGAGTACCTGAGTCATGCCGGAGAAAGGAAATGAAAGGGACAACAGGCAACACCGAACAAAGGCA…
CUFF.8387.1	chr13:20226365-20228426	-	TGGGTGGGATGGTAGTCTTTGCAGCTCTGAGCCGGCCTAAGCCACGAGGAGAATCTGACCCCAGAGCTATCAGAAGTCACTGAAAACACCACACACTGGAGGACCATGAAGTGCTCCAGCCCTGCTGGCATAGCCAGACCACCTCAGACAACACACGCCACGAAATCCAACTGCACCTCAGTCCCACCAAGGGGAAGTCCAGCTCTCCTGCCTCTCAGTGGAGAAGTTTTATGAAACTTGGAAGATTTGAAAGTCAAACATAAGGAGCAGAGAAATTGTTCCAAAAGTAAGGCTGGAGATGGGGCAGCAAAGAGTACCTGAGTCATGCCGGAGAAAGGAAATGAAAGGGACAACAGGCAACACCGAACAAAGGCAGAAGAGACACAGGATGGTGAAGGT…
CUFF.8391.1	chr13:20247491-20248382	-	GTGGGGCCAAAAACGTTTCCCTCTGGAAGGGAAGTAGCTAAAGCCGATATTTTTCTGGTGGGAGGATTTGCTTACGTCTTTGAGAGAGGGGAAGACTTAAGGAGGAGACGGGTGCCAGGAAAGATGAAGAAAGTTGTAGAGGAGAAACTGGTGGACATGGGGGCTGGAGAAGAGACAGCTAAAAGAAGCATGGCTGGGCACATTTTGATAAGAGGATCGCAACCGCTGCCGGCCGGCATCATACTGAAACCCGGTTACTCAGAATGGGCTGCTGGCAGGCTGCCATACTGTTAGCCGAAAATGCGCATTGCCACGTGGTGAGCTGCAGCACCCTGTTGGGAACAGAACTCGAATGATGAGATTTGTGAAACTGAGAAGCAGTGTTTGATTTGGGGAAGA…
CUFF.8391.2	chr13:20247491-20248382	-	GTGGGGCCAAAAACGTTTCCCTCTGGAAGGGAAGTAGCTAAAGCCGATATTTTTCTGGTGGGAGGATTTGCTTACGTCTTTGAGAGAGGGGAAGACTTAAGGAGGAGACGGGTGCCAGGAAAGATGAAGAAAGTTGTAGAGGAGAAACTGTAGGTGGACATGGGGGCTGGAGAAGAGACAGCTAAAAGAAGCATGGCTGGGCACATTTTGATAAGAGGATCGCAACCGCTGCCGGCCGGCATCATACTGAAACCCGGTTACTCAGAATGGGCTGCTGGCAGGCTGCCATACTGTTAGCCGAAAATGCGCATTGCCACGTGGTGAGCTGCAGCACCCTGTTGGGAACAGAACTCGAATGATGAGATTTGTGAAACTGAGAAGCAGTGTTTGATTTGGGGA…
CUFF.8394.2	chr13:20461137-20507230	-	GAAAATCCTCTGCTTAAGAATGAAACACCATCAGAAGCTAAAAAACGGTTGTTGAAACCAGGAACTGCTAGAGCAAATAGACGCAATGCTAGTGATAAAGTACCAGATGAAAATCCTGTGCTTGAGCAAGAGTCAATGTCAGAAACTCAACTGGAAGTAAAGAAACAAAGACCTTCTAAAGAAAGAAGACTCAGTTCTCATGAAAAAATATCAGATGCAAATCTTATGCATGACCATCAAGAATCAATGTCAAAAAGCCAAATGACAGTAAAGCAACAAAAAGAGGAAAAACACAagacattgaaggagcatt
CUFF.8420.1	chr13:22924284-22929400	+	acatccattaaaccatcagtgtctctgattgctgactcccagctctttcacaggcctcatagttctgaggggtgcagccccacCACTGGCTGAGCAGCCAAGAGACTGAATAAACTCCTGAGAGAGCCAGGGAATGGAAAGTTGCAGGGGCTGTCCACTAACAGGCAAATATAAAGGAGAACTAGTACCAAGGGACATGCTCTGAACCTGGGGTGGGAGCCAGCACGCCAACATCAAGgaggattctttaccactgagccaccaaggaaaccccatgGTTACGGATGCACGAACGAAATTTGATGACTCCAAAGGAGGACCAAGTATGCTCCTCAGACACTAGCAAAACAGTAGCACTAGAGAGGAGAGAGAACCTGAAAATTGGGGCTTCATTGTGAG…
CUFF.8601.1	chr13:30735536-31040459	-	TAGCTTGGTCTTGTGTCGCTGGATTGTTCGTGGCCGGCAGCAGTGGCGTGGGGGCAATCATCCTGCAAGCCAACAGCAAGACACAAATTGAAGAGCCTTGAGGGAGTGGTTCCTGAGCTGCACTAGAGGCGATCCCTAGGAAGAGATACAGAAAGCTTTGGAGCTTTGAAGGTTTAAGGGAAAGAAACCTGCAGCTAAATTTGAAAGGATGGACATCTTGATCTTGAAAAGGTCTTGTGGTGGTTTGAGATCCTGTTGGCTGTCTGAAGGGTGAGTTTATTGCTGAAGCTTCAGCTCAGGTCACAGACCAGGGGCTCCAGAGTCAGTTCCTCGGCCAAGTTTGATGATGTTGGCACAGAAATCTGCTATAGCTCGAGCATCTAACAAGACCAGACACAT…
CUFF.8601.2	chr13:30767356-31040459	-	TAGCTTGGTCTTGTGTCGCTGGATTGTTCGTGGCCGGCAGCAGTGGCGTGGGGGCAATCATCCTGCAAGCCAACAGCAAGACACAAATTGAAGAGCCTTGAGGGAGTGGTTCCTGAGCTGCACTAGAGGCGATCCCTAGGAAGAGATACAGAAAGCTTTGGAGCTTTGAAGGTTTAAGGGAAAGAAACCTGCAGCTAAATTTGAAAGGATGGACATCTTGATCTTGAAAAGGTCTTGTGGTGGTTTGAGATCCTGTTGGCTGTCTGAAGGcaaattagaagcaagacattaaaagttggagacattgaagggaacacatcaacagcaggaagaagtcatactgcgcagcctgagcatacagatgagaaagaaaaaAATTAGATCTTAGATTCAaccacc…
CUFF.8601.3	chr13:30769952-31040459	-	TAGCTTGGTCTTGTGTCGCTGGATTGTTCGTGGCCGGCAGCAGTGGCGTGGGGGCAATCATCCTGCAAGCCAACAGCAAGACACAAATTGAAGAGCCTTGAGGGAGTGGTTCCTGAGCTGCACTAGAGGCGATCCCTAGGAAGAGATACAGAAAGCTTTGGAGCTTTGAAGGTTTAAGGGAAAGAAACCTGCAGCTAAATTTGAAAGGATGGACATCTTGATCTTGAAAAGGTCTTGTGGTGGTTTGAGATCCTGTTGGCTGTCTGAAGGGTGAGTGTAATTACGGCATTTTGGGACAAGAAGGTTTTCAAGAGCTTTGTTGGAACAGCAACATATGAGTAGATGAGCACTCCATTTCCATCCTGTGCATCATCTCAGTAGTCAAAGCAAATGAAATCT…
CUFF.8623.1	chr13:32753342-32792492	+	CACGCGAGACCTGAGTTCCTAGGTTGAAACCCCAAGCTCTTTCCCACTTGCTTGTGAGCAGACTATCCATCTCGGGAGTTACTGGATGAAGGATGTGCAGGTAGCCCTTTTATTCATCTTTGCCTTGAAAGAAAAAAACAAGCAGTTATGTGTACAAGGCACTGTGATGTCTCAGATGATTTGTAAGAACTGGCTGAAGAAGCTGGTGTCCAAGGCTGTGGACACAGgaaggagtaagagccaagtattgctggcagcctcaagaagctagaaaaggcaagaccatggattccccccagagtttccagaaaggaaaacagccctgctgactctttgattttagccctgtgagaactgtgtcagctttccaaccttcataattgtaatataataaatgta…
CUFF.8625.1	chr13:32801840-32805681	-	TATCTGGTATTGTGATGGGGTGGAACATGAGAGAAGGAGAAGGTTGTGGGAATTCAGGTGGTTCAAGAACTGAGAGCTTAGAGTTGAAGCTCAAGTTGCTAGTACTCCTGGGGAAGGAACAATGACAACATCAGATTATCTTAAAACCAGAAGGAAATGAGGGAAGAAACACAGTGATCCGGAGCTGAAGCGCAGCCACGAGGAGCCAGAAAACGGAGGAGGGTGACTGTTCTGCTGAAGAGTGTACCTTCTAATTCAGAAAACTTAGTCACCAGACTGAGAACAGATAACAAGAGTAGGAGGAAGGACTGGGGAGTGTGGGGAAACGTTTCACAAAGCTCTGAAATCCGCAGCATGCAGAGCAAGCTCTTGACAAACTCGCAGCTTTCTGGAACCTTC…
CUFF.8649.1	chr13:33683321-33685568	-	gagccaaggtgaggcgagctttcagtttccagagccacagagactgagaaggagcaaggagtcatttcccaaaCAGATGGCAGGCAGACAAAAATAACAGAGCATATCCAGCTACTTCCTCTCCATAAGATCCTCATGGACTGATTTTGATCATGGAAAGagtctctgaaatcagccccctctgatctctgcctcctggtattacattgttctatgatcccctcccttccacgtgggctggattgagtgactcacttctagagaagacaatctggtggaggcgatggtgtcagttctgagactgggtgatgaaggactgcagattccatcttggtggccccaacttttgctgcctatctcttgcctggttcccttggggaagctggcgaccatgttgtc…
CUFF.8655.1	chr13:33921274-33923246	-	GACCAGCAACTTCTAAATCTCAACTTTTCTCATCTTTAAAGTGGATATGACAGTACAGTTGGTTCTATGATCCAACAAAGGTGTTCCTAAAAAATCCTGCTCTTGTGGCGAAGCTGGGGCTGGGGGCACCCAAAAGCTAGTAagggcttcccaggtggctcagcggtaaggaatctgcccaccaatgcaggagatgtgggtttgattcctgcgtcggaaaaatgccctggaggagatggcaacccactctattattctttcctgggaaatcccatggacaggggagcctgacgggctacagtccatggggttgcagaagaattggacacgacgaagcgacAGAacaagagccaataaaaatggcagcactgtttaacacgtgttctgtggtttagacat…
CUFF.8732.1	chr13:38179486-38180973	+	atgagtgagggaaatgagacaggacaagaggaagaaagttaaacatgaatttggaagtgttctcatctggagactgtcctcagcctggatctcaggggagcatcagagcataatggtaccacagaactggctcccgcttcagATTGGAGATGCAATAATCCATTTCAGCACATTTATTCACTGTCTACAATGTATTTTGGAGCATCTACATGGAGAAGGAG
CUFF.8782.1	chr13:39111086-39116807	+	AACAGGAAGAGGTACAGGAGCCACTGAGAGCCCCTGCCCAGAGCTGAGATGGGGCCGAAGAGACCAGCCACTGACAGACGTGACCTCCTGAAGTTTTATCACATGGCCATACCCATTACACTGCTGGGCAAACTGAGGAGCAGAAGGCGCAAGATAAAACGTATCTTAGGACCAGACAAAGGAAGTTTTGGGGTGAAAATTCTCTTTCTACCTCCCTCTCACCTCTGTGGGCATCACTTCTACTAGGAGTGGAGAATCAGTCCCCTTCAGAATCTTCTCTTCACGAATTTTACCACCCCATGGCTTTCCAAACCCTGAGTTTGTGGCCTTTTGGGGGCTGTCAGGTCTTTTAACTTTATGAACAAAAAggacttccctggtggtctagtgattaagact…
CUFF.8804.1	chr13:42714351-42719730	-	gtctgagaggttgtggtaaggacacttcacagccatttgctttctccccagaggtacaaacagtgagagatgcaccggcattgtaacagcagcaacagaaacgttccattagaaagATGACACCATGCTGGGCAAGAGGTGACTGCACCAAGGCCAGACCAATTTCTGGAATCTGATGGTTGGAGGAGGCACTGCCATTTATTCCCCCAAACGAGGCTGATTGATGGATGCTGGGAGACAGAGCAGCACTCGGCAGaactgaatctgatggacatgtggagacttcatcactgatgctagaaagccggccagcaccagagctCACCCAGAACGCCCATCTTGGCCTTCGAATACCCATCCCAACCTCATAACGCTGCTGGGACCTTGGATGACCTTGGG…
CUFF.8804.2	chr13:42719236-42719728	-	ctgagaggttgtggtaaggacacttcacagccatttgctttctccccagaggtacaaacagtgagagatgcaccggcattgtaacagcagcaacagaaacgttccattagaaagGTCCCCAAAGCCACCTGGTGCACAGCAGACCCTGGTGCGGGTCACTCCCAACCGGCTGGCCTCTTGACTGGAGGGCTGCATGCTCCTGAGTTTTCATCAATGATCGCCGGGTGCAGAGACATCACCCTGACTGATACACTCAGAGGAGGGACCAATTCTCTGAAGAGGTTTCCTCTCTACGGGCTCTGCTGGTTACCTAGCCTGTGATGGACCGctgtcccttcctggtccccattgcccaccctccact
CUFF.9034.1	chr13:56552055-56554943	-	GAAAGCTACAGACTCATgctttggaattaaacggacctggaagggaatcttgttcctgccacagacctcactgcggagtctgagaggtgctgagtgggtcactcatgtcaccctgaggagcttccattggctcacctggaaatgaggaccctcctacccactcacggggccatcctgcagatcagCTTGTGGATTCTCTTGTACCCTCGGCTCTTAAGACACAGTTCTGAGCCCAGCGAAGGTTTCAGCTCACCTTGGAAATGAAATGTGAGGCATGATCAAGATGAAAGACAGTTTGCAAGACACCTGAGCATGGAAATTGTCTGCAATTTAGCCATTCTTCATTCTCTGTGATTGGAAGCACTGGCCCACTTACAAATGACAATCGAATAAAGAGTT…
CUFF.9069.1	chr13:57979710-57997296	+	ctgaggggattcttctcagatacttgttaatactagggggaactggtggagctactgctggtaaacctcatatttgggccccccccCCCACCACCACTgctgagctcctgctggtgaatctcatgatatttgggggtccctctacccctgtggtcttaggtttttaagctcagagttatccacaccgagcctccagcagtctttcaattacagttcagcttttcttgcctgacattggtccccagggttttgacctgtgagtctcactctgGTTCAACCAGGATGGACTCGAAGCTAATCTTGTTTGACCTCTGCCCGATACCAGTCATGTCCTGGAGCTGACTTGCTCTGCCTGCCAAGACCCAGTTCCATGTTCCATTCCAAGACCCAAGATtctct…
CUFF.9074.1	chr13:58050427-58089921	+	AGGTGGTTTTTCTTGTCTTTGAGTCAACGTGGCAGAGACTTCAAGAGTCCATGAGGGTGATACAGATTTTCCCGGGTTTTCTGACCAGTGAGGAAAGTGATCCTAGAGAGAGATCAGTACGAGCACCACCTCTAGTCCCAATGGGAACAGCAGGAGACTCTCCAAGGTAGGTTCCTAGGCCCACCCACACTCTCCCACCCTGGACACTT
CUFF.9112.1	chr13:60596746-60602609	+	tgaggggagagacccagtgacctgtgttaacaagcccaccagCTCTGGACTGGGAAGTATCATTGGAGGACTTTGGGTCTCTTGACACTCTGTCCACATGATCATCGCAAAATCCACAGCATCAAGTCTGCCTAGTAACTTCAGACGTCATGAGCAGAGATGTTCTGTGCAAAGTGCATCATGTGCATTGCCATCCAGTCTCCACAGCACCCAGTCCTTTCACGCCCCAGTCCTGTGACCATCCTTCTTCCACCTCGGCACCCTCCCTGACAGTGGATGCTGGGATCGCCACTTCCTCTTCTCTGAGAAAACAGGC
CUFF.9118.1	chr13:60958828-60960986	-	GGGGCAGCAGCACCTCTGTGGATGGCAGCCAGACTGGCCTTCCAGGGGGTGATTATTCCGGCAGCTGAGtatcttccagattttccaataggccaaagagaaagtctccaacgatgctgttaacatcttttgaacacccgtggatcgcgtgtgtgctctcccagtctcttttgctctctctctcacctggacaaagctgatcttggacccagaacttctacagacaatggtatccagctagaatttgagaatattgttttgtttccattttgctcattttggtcagttactttttatttgtggtaagggattctgattttttttttTTTTTCCTGTTTGGATATTACTGGTGAGAGTACAAAGTGGCCCTGGAGAAGCTATGGAGAAGTGTTGGCATTT…
CUFF.9245.1	chr13:65328029-65329456	+	AAACGAGCCGGAGGAGAAGGAGGGACATAGGACACGGCTGAGTACTGAAATTCAGGGGAAGAGGGTGATCACATGCTGACTTGAAACCTGAGAAAGGAACGTTAGGAGTTTCTGGTTGGTTGGTTGCAATTGGGAGCATCTTTGAGTATTGATAGGAAATTATTATAAAGTTGAAGAAGATATAGAAGATGCAAGGATGCAAGACGTTTCCTCCGAAGAATTTTCTACTCAAAGGATGGAAGATGGTATGAGATTGTAGTTCAGAAGAAGAAAAGTTTAACAGAGACTGAAAGAAAAAGGGGCCACTGAAATATGGAGGATCTAGTTGAAGTTTtggcaccccactccagtacttttgcctaga
CUFF.9392.2	chr13:70871758-70876641	-	ccagtgagatgagaattttaagaggagaaaatggtctgtagcttacattgctgcaagaaactcaggataaggccttggacttgttaactagggagtcattgccaagaggagctttagggaagtaatacggaaggaagtgatgattcaggtgtgggattTGTTAGTATGGTTACTGTTCTGAGGTAGAGTTGAGCCTGTTTGCGGAGAGAAGGAAGTGattcttcgtggaacacatgtttattgagtccctgttatgagcccattgctttttcagactcaggaagtacagcatgaacaaaacagagcttacactcgtgtgtgtgcatctcacaggttttaattgtggcacat
CUFF.9420.1	chr13:72268226-72268949	+	CTCAGGGGTAGCATCTCTTTGTGTCTACAGCCTCTGCCTACCTGAGCTCAGGTGTCAAGTCCTCCACCCTGCTTTGGTCTCCCACTTCATTCTTCCTCCCAGTTCAGGTGCAGTAAGCCCACCTGGGCAGGGTCCAGCACCATCCTTCTCTTTCCTGAGGACCAGCAGTGGGAATTAAGCCAGTGCTGCCCATTCATGCGACAGGGTGAGTGGTGAGTCGCGACAGAGCGCGAGtgacgatgctgaggttcacctgggccctgcgttcctggagagcagtgagggGGCCCTTCTGAGGATTGGTTGACGGCAAAACAAACAAACAAAAACCCTAAAAACACTTCCAGCTCCTGTGACGGATCAGGCCACCTGCTCACCCACCCATCACAACCTGTTCGC…
CUFF.9429.1	chr13:72931706-72935549	+	TGCTGAACTGCAAGTGGCCACGTTACAAAAGGAAGAACTAAGTGTTTGCGAAAGCTGATGCCCCAGAAGGCACAGGGTAAGAGATCAGAGGTGTGGGCTGGACTTCGTGTGTGTATAAAAGCAGCCcaggtcctggcactcgtctcagtctcatcctcctcatcaggcatgcgagagatttgcagtaaatggtttctaagAGACCAAATTGTCACCGTTTggacctactgtatagcactgggaactctgcttaatgttatgtagcaccttgaatgggaggggagtttgggggagaatggatgcatgcatgtgtgtggctgagtccattagctgttcacctgaaactgccccaacattgtttgctgatcagctataccccaatacaaaaAGTTTTTTAAA…
CUFF.9516.2	chr13:76491008-76498834	-	gtgacattaGTCAAGGTTGGGTTTTAAACATGTAAATGTTTTCTAAACTTCAGCGTTCACAGACCATCTTCATCTTGGACTCCCTCAGGACAGCGCCTTTATGATTACTTATTTTCTTTAATCCAGCAAAACAAAGGCCACTCACATTCCCTCCAGCATCACTGGTGCGGGTGCGTCCCGCACCCTGAGCTGTGTGCTGAGAGATTGCTCCGTACGGGAAtcttttggtctccatgataaccccctgaggccggcactaatcccagtccgttctccagatgaggaaagtggtctgctcaaggtcacaaaacagAATGAGAGAGATACTGTCTTTACCCACTGAGAGCTCCGAGTCATCTAGAATTCAGAAGGAAACACTTTCCGACTGTGGCCCGTCAG…
CUFF.9516.1	chr13:76491008-76499440	-	tgtgactggggacggccttttggagagctggcctctgaactgaaacctgaagatggtggggactgAGTGTGATGTGTAGAGcggtgacttcttaatgctgctgaacgttagacgcacctgttagaacaacacaccaataaatgtccaggtgccgccctccttcccaaggtaatgacatctgactttccgaggtggggcttgggcctccataaagctcttcaggtgatcctgatgggcagcTCGATCTCAGAGCCTGTAGCCTGGTTggaagaacatcccaggcagaagggagagcaaatgaaaaagacccgagggggcgtctggatcttctaagaagaggaggaaggcgagtgaggccagaatgagggattcagcgctggaggttgatgagCAAAACAA…
CUFF.9516.3	chr13:76491008-76499440	-	tgtgactggggacggccttttggagagctggcctctgaactgaaacctgaagatggtggggactgAGTGTGATGTGTAGAGcggtgacttcttaatgctgctgaacgttagacgcacctgttagaacaacacaccaataaatgtccaggtgccgccctccttcccaaggtaatgacatctgactttccgaggtggggcttgggcctccataaagctcttcaggtgatcctgatgggcagcTCGATCTCAGAGCCTGTAGCCTGGTTggaagaacatcccaggcagaagggagagcaaatgaaaaagacccgagggggcgtctggatcttctaagaagaggaggaaggcgagtgaggccagaatgagggattcagcgctggaggttgatgagCAAAACAA…
CUFF.9582.1	chr13:78104574-78105513	+	TGATGGCAGCCTGATTGCAGTTTGGTTCAGTTCTGTAACAGGAGTTTCAACTGTGGAGTCAGAATGCAAGGCCTCTTGAGAAAAATGTACATTTACTTCTGAAGCATGAAGCATGAAGGTTTGGGTTGTTGTGTAACCTAAGTGTGTAGAGGTAAAAAGCTTGTGGCTGTTTTGGTTATTTTACTTTGTAGCCTTCCTGTCTA
CUFF.9599.1	chr13:78724031-78729040	-	aaggctgagcaccaaagaattgatgcttttgaactgaggtgctggagaagactcttgagagtcccttgaactgcaaggagatcaaagcagtcaatcctaaaggaaatcgaccctgaatattcagtggaaggactgatgctgaagctgaagctccaatactttggccatctgatgcgaagaactgactcattgaaaaagaccctgatgctgggaaacattgaaggcaggaagagaaggagatgagagaggatgagatggttggatggcatcaccaactcaatggccatgcatttgagcaaactccaggagacagtgaaggacagggaactctgacatattgcagtccatggggtcgcagagagtcagacgtgactgagcaactgaacagcaacaacTTAG…
CUFF.9600.1	chr13:78730681-78733363	+	CCGCTACATTGGAAGTTTAGCCACTGGATTGCCGGGGAAAATCCTGACTCCTGTGTTCCATCTGTGTTAAAAGgaagtctcaatgtggtgatagcctgtcttcaacacctctgtaatcatgctcaatctccctttCCTGCGTcaacagtatccggcacgaattcgtaagactatactgtttctattgtatttgttccccgtgccttgtggaaatacgtggtgttgattttctatttgtagcttgggagtggtatcaaatctccctgtaaaatttgtttgctgaaactcgactgaagagaaagattaaggaaTAGTcatgggattttccaggcaagagtactggagtgggttgccattgccttctccgaagtaATAGTAACAACCATTTAAATTTTGGGC…
CUFF.9636.1	chr13:79973982-79976053	+	GGCCTGAGCAAAGCCTTTTGAAGACTGTTAGGAGTATTTACACTCCATGCCGCCTGGGGAGAAACAATTAACATCTGAAAAGGAATCCCTGGCTTGTCCTGGGGTCTCTGCAATTAGTGTAAACAAACATCTGTGTGATTAAAAACTCACCTGCCAAGAACTTGGAGGGTTTTATTTGTTTGCAAAAATTGCTCTAGGGGAGACAGACTCTGGTGGGTGCACTCCGCAGAGATAAACAGGGTGGGGGGGATACGCTGCGCACCCCTTTTCAGTGGTCTGAGCTGAGTGCATTCAAATTGAGGGCTGTGCAGGGAGTGGGTTTGCTTCTATTTAGGTCACTTTCTTGCTGGATGAAGCAGCTAATGTAGATGGGTCTTTGGGGGTGAGGGAGGGGGCGGG…
CUFF.9636.2	chr13:79973982-79976053	+	GGCCTGAGCAAAGCCTTTTGAAGACTGTTAGGAGTATTTACACTCCATGCCGCCTGGGGAGAAACAATTAACATCTGAAAAGGAATCCCTGGCTTGTCCTGGGGTCTCTGCAATTAGTGTAAACAAACATCTGTGTGATTAAAAACTCACCTGCCAAGAACTTGGAGGGTTTTATTTGTTTGCAAAAATTGCTCTAGGGGAGACAGACTCTGGTGGGTGCACTCCGCAGAGATAAACAGGGTGGGGGGGATACGCTGCGCACCCCTTTTCAGTGGTCTGAGCTGAGTGCATTCAAATTGAGGGCTGTGCAGGGAGTGGGTTTGCTTCTATTTAGGTCACTTTCTTGCTGGATGAAGCAGCTAATGTAGATGGGTCTTTGGGGGTGAGGGAGGGGGCGGG…
CUFF.9719.1	chr13:83913116-83920391	+	gaggagagaaaagaagagagggaaagggaaagaaCGTTTTTCAAAGCCACACGCACTGAAGCAAAGCCACACCTCCTGAAAGGACAAAATTCTCTAACGAAACAATTGGGGACTACTGAAGAATGAAAAATGGATGATTAACAGCTTTATCTGGTGTCAAAGAAGCTCTCTTCATCTCTTAGTGATGAGTTGGCAATTTCTTATTTGGGAAGCCTGTTT
CUFF.9794.1	chr14:3421211-3422770	+	AGGAGCTTTGTCTCCCTCTGATGAGAGAGGAACTGGAGGCCTAAAGAGGTAAAGTGTTTTATCCCAGTTTGCGTGCTGAAGAGGAAGAGAGGCCTCTTGGCTGTACAGAGGGCAAGGAACCAAGGATACTGAACCGGGGGCCCTCTCGCACCCCTGGAAAGCTGAGACCCTGGGGTAGTGCAGAGAGCATCCATCTAGCATCCAGGACTCCCTGCCTGAGGCCCAGCTACACGACTTCCTGGCTAAAGACTTTCCCTCTCTGGGCCAGGCTTGCGGATCTATAAAGTGAGACCCTCGGAATCAGGCCCACGACTCAGATGATGAGCGACGTGGATTTCCCTCCGAGAGGAATATCTTGTTGAAAGGACTGTAAGGATGGAGTGTGGAGGCAGGAACGCG…
CUFF.9866.1	chr14:5769042-5787697	+	AGTACTGCCCTGGAGTTCGTGCGAAATATTTGCCCCATCGGTGCACTTATCTGTGACACTGCAATTATCACTGTGATTCCAGGAGgttagctcagacgtgttcccacaacagtctcggggcagcacagaaccaagtagagaggctgtcaggacctctgagatcttggcttggaactcccatcatgaccttgccactgcaagtctactgaagcaaatcataaggccataacagattcaaatattgaagaaatggaaacatctcttgatgaggggagccacaatgtcacatctcaaaggtctacagatggagagaaattttgcccacagatgGGTTACTTTGCAGGATGGTATGTCTCAGGCCAATTTTGATGTGGACAGGAATTAACTTGATGGAATATT…
CUFF.9867.1	chr14:5830374-5856928	+	agaagaagaagaagGcaaaggaaaaaagttatcatggtacatccaggctgaaagggaacatctgtgtcctccttcctctccgtggctgtttttaatgactttcttcctccctGGAACAAAACAAAACAATCAATCAAAGGAACAAGCAAAAAAGAAGTAAAAGTAAAAAAGACACTCTTCAGAACACAATGTTGATGCCAGTCTCTTGAATTAAGTTGTCAAGTTTGTTGACATGAGTTACACACTTACCAGGGATTACCACAGTATTAGCTATTATTAGTATTAGAATTGTTATTATCAACTATATATCTTAAAAATAAAGCAACCTATAAATATGG
CUFF.9924.2	chr14:12290408-12291848	+	gactgggcatgtgcaagtctcagctccttgaccttttgatttcagagggccTCAGGTCAAGCTAAGCTCCTTGGTTTATTAAAGGctctccccatacctttgactgccttgctgcatttttccttatcccgtaaatgccacaagcaccttgccttctgggaagtggatctggagtccttctgtctccttgattggctgcctttgtcataaaccctcccttaactgcaagcctcagcgtctcagcaatttagcttgatgtgagtcaggaaaaatgaacctgcttcagtagcaTTACCTCTTTtggaaaaatggaagctcaaagcgattaagtttaaaagtgtaccagtagtaagtggtagaggtcgccgcagagcactgagttgagtcctggtgccatac…
CUFF.9924.1	chr14:12290408-12386655	+	gactgggcatgtgcaagtctcagctccttgaccttttgatttcagagggccTCAGGTCAAGCTAAGCTCCTTGGTTTATTAAAGGctctccccatacctttgactgccttgctgcatttttccttatcccgtaaatgccacaagcaccttgccttctgggaagtggatctggagtccttctgtctccttgattggctgcctttgtcataaaccctcccttaactgcaagcctcagcgtctcagcaatttagcttgatgtgagtcaggaaaaatgaacctgcttcagtagcaTTACCTCTTTtggaaaaatggaagctcaaagcgattaagtttaaaagtgtaccagtagtaagtggtagaggtcgccgcagagcactgagttgagtcctggtgccatac…
CUFF.9933.1	chr14:12555915-12606777	-	gagaggaagtcagaaagcttttgagcatgagatagcacagggacatgcttttatttgtttgaagctggaaggggccacctgagaaggaatgtgggcagcttctaagagcaaacaacagtccctggctgacagccagccaagaaacgaggacctccatcctacacctgcaaggaactgaattctgccgacacctgaatgagcttgaaagtgggttctcttccaacacctccagataagagtccagctggcttacaacttcgtttcagccttgtgataccctgagaagagcccagcttagcctgccaggacccctgacctacacaagGCTGTGAGTGTTGTGAACACTGCATTCCCTGAAACCACTGAAGAACAAAGCACTGCATTCAAGCCTAAGGGGAG…
CUFF.9933.2	chr14:12600966-12606777	-	gagaggaagtcagaaagcttttgagcatgagatagcacagggacatgcttttatttgtttgaagctggaaggggccacctgagaaggaatgtgggcagcttctaagagcaaacaacagtccctggctgacagccagccaagaaacgaggacctccatcctacacctgcaaggaactgaattctgccgacacctgaatgagcttgaaagtgggttctcttccaacacctccagataagagtccagctggcttacaacttcgtttcagccttgtgataccctgagaagagcccagcttagcctgccaggacccctgacctacacaagGCTGTGAGTGTTGTGAACACTGCATTCCCTGAAACCACTGAAGAACAAAGCACTGCATTCAAGCCTAAGGGGAG…
CUFF.9941.1	chr14:12769323-12795159	-	gccaaccaatgtcaattccccctctaactggtaacctccccctccctccaggagctgccctgtcccgcctgctgcctgcctggtacggtagactgttgttGTTTTGTGGCTGGAGTGGGAGCTGTCATGTCCCGGGGCCTGCAGGCGTCCTTAACATGGACTCACCGCCAAGTGAGggttcttggcttctcgacagggggaaagaattcaagagccagccaaggaaaagcaaagCCTGTTATTGCTGCAGGTACTAAAGAAGAACGAAATGATCTCAAGCTAGGTCATAAAAGAGAGAAATCTAGGAGATGGAGAACCTGGAGCATTTAGCTTTTATTGACACATGGCTCAGCTTTTCAATTGTATCAAATTCAAAGCAATAAACACTCATCCGGTGTC…
CUFF.9941.2	chr14:12769323-12795159	-	gccaaccaatgtcaattccccctctaactggtaacctccccctccctccaggagctgccctgtcccgcctgctgcctgcctggtacggtagactgttgttGTTTTGTGGCTGGAGTGGGAGCTGTCATGTCCCGGGGCCTGCAGGCGTCCTTAACATGGACTCACCGCCAAGTGAGggttcttggcttctcgacagggggaaagaattcaagagccagccaaggaaaagcaaagAATCAGGAATCATCCCAGGAGAATGAAAATATGGAGATCTTTTAGCCTACAACCTCATGTGGCAAAAAGCCTGTTATTGCTGCAGGTACTAAAGAAGAACGAAATGATCTCAAGCTAGGTCATAAAAGAGAGAAATCTAGGAGATGGAGAACCTGGAGCATTTAG…
CUFF.9972.1	chr14:16838327-16839271	+	AGGGTAGGGTGGTTGTTAGGTTTTTTTCAATCATCCACACGTGGTTAAgctattagtggaaagaggaatttaagtactgtaaaggagaccacttaggggaaagataaattttgtttggaacatgttgcatttgaggtacctgtaggacatccagtggagatacccagtgagcaattACTGTGGTCTCTTCTGAGGGGTGAAGGCTGAACTATTGGATCTGTGGGATGTGTGGCATGGTGCATGTGTGGTATGCTGTATGCATATGTTGTAGtgactgagactgtGAAagaggagggaatatagaccaaaagggaagaaaagaggaaggaaaatggactgacaacatccaatgtatgagaggagaagcaaacaaaaaagaatggaaagaacaacgagata…
CUFF.10031.1	chr14:18857868-18950808	+	gttcagggtagcgttgctggtcttgaagacgacgaaaggaggctatgagttaagaatgtggctggcatctagaagctggaaaaggcaaagaaatggagcctccAGAACTGTTGCTCTTCATTTGTGGCCTCTCTCTCTCAAACAACTTTTTTTGAACATGAAGTTTGACCACCAAGACTCCTCTGCCATGTACAGCTGTATACAGTCTTTCCTGtagaaccttcaactgtctttagaagattgcccttgagctactggacccAACCACCTCTGCATTTCTGCCTGGAAATTTACCTACTGCCTGTTTGCCTGCCTACCATCAGTGGCTTGTACTAATGACTGACTAGTGCAGTACTAAAGCATCCTgactgaagctggggcttaccaaaaatccatcct…
CUFF.10115.1	chr14:26045757-26099805	+	TTTCCACAGAACTCTTTATGCTGCGTTGGAGACACGGATACAGAAATACTCCGCTGCGTCCTGGCCACGGCCGAGGTGCTTAGCTGGTAACGTTACAGGAGGAATCGGGCACCCAGGAGAAGGCGGTCGTCTTTGTTGTGAGAGCAGGGCAGTCACCGGCTGCTGAAAGGGCTCAGGGAAAAAGTTTCAGCTCATGCTATTTCGTGCAGTGGAGAGTACTTGAAGGGAGCAAGGATTCCCTGCGATTCCTGCCTGCAACTGGGCAAACACTTATTCCCCTCTCAGAGTGGACTCACAAATGAAGCCTGTGAACAAGTTTTCTAAGTGACCTTGGAGAATGACATTAAAGTCAAGGCTCCATTCTGGACTGAGATTTAACCAGCTGCTTTTCTCCTATCA…
CUFF.10115.2	chr14:26085568-26099805	+	TTTAATGGTGGAGAGTGATGGGGATGTAAGAAAAAGAGAATAACCCACTGATACTCATCTGGCAGCagaaatcccaggccagatgcctcaggaagggcactgatatttccacagAGTGGACTCACAAATGAAGCCTGTGAACAAGTTTTCTAAGTGACCTTGGAGAATGACATTAAAGTCAAGGCTCCATTCTGGACTGAGATTTAACCAGCTGCTTTTCTCCTATCAATTTTAGATTTGATTTCATTTTTAATAATGGTTTTATTATTTACTCTAGGCTGTTTCACTTGCACA
CUFF.10176.1	chr14:31725940-31735090	-	GGGGCTCGACCAGCGAGTGCGCTTTCTCGTGAACCTGGCTTTTTGTCTTCACTTCTTGCGCTGCGAAGTGCTTTGTAAACTTCAAGCTCTAGctattgattatcactgcctggatccgtgatgtcattatagtttgcaaaagggtgatGACTgcttcccacatggctcagtggtaaagaatccacctgtaatataggagcctaggagccatgggtttgattcccgggtcgtgaagatcacctggagaagaaaatgtcaactcactgcagtattcttgcctgggaaatccggtggacagaaaagcctgacagTATTCAAGTACTCCTgggacttctcaggtggtacagtggcttactctgtgcttccagtgctggggacgtggatttgatccttgatcca…
CUFF.10216.2	chr14:33535403-33536532	+	TGATGGGAGAGAGAGGGATCTGGAGACAGGGCAGGGGTCAGAGGCAGGGGTCAGGGGTCAAGGAGTTCTCAGCCCAGAGTTTTCAGCCATGTTTGCTGGGCTTGCCTGGTTGTTCTCCTACTTCCTCTAAATCAGCTTGTGCCCCTTCCTTTCACAGCTGTTGATCCTTGACAAGCATCTTGCTCTACAAACTCGGCCAGAACGCTCTCCAGGAGGACTCAGCCTCTGACTGCAAAGAAGGAGGAAGGCTTTTTGTCTTCTGTGATGGTCCTACAAGGCCTCTCCTCTGACCTAGGGGAGGTGATGGTCTTGGGAACCTGACAGAGATAGATTCTACCATCCAGTGAGCAAGAACAGCTTTGGAGTCTTCATGGAAGGAGCCACAGATACCATGGAGTA…
CUFF.10206.1	chr14:33742702-33790804	-	ACATGTACTTGGTGTTGACTGCTTCCCTGTAAATGCACACAACACACACAGAGTGATAAGGTGATAAGACTTACTCCCAATACAGAAGAGGAAGCGTTTGTACTGAAGAAAATATGCCACCAACTGAAGGTTTGGAAAAAAACTTTTGCTGAGATTATTCGAGCGGCCAGCTGAGAGCACGAAAGAACACCGAGATATGGATGTGCTAAAAGGAGGAGTCTGGATGGAAGGAACTGGGGGCTTGCCACGGACCAACCTGGCTCCCTTCACAATATTATCCAGAAGCGCTGACGGCCTGGCCAGTGATCCATCTCTCCTGCCATCCCCAGCAACAAGCCTGCTTCTTTATTTATTGATTAATAATGTGTTCAAACCATGGCAGCACATTTTATTTTAGTA…
CUFF.10260.1	chr14:37513865-37522142	-	GGATCAGCTCTACTAACAGTCAGCTTCACTgtggtcctcgtggcagagagtgtagtgtgaggtggattgcagccttctcctgaagccctccaggcctagaggccagcagtaatcgtgtggatgtgagagttggaccataaagaaggctgagcactgaagaattgatgtttttgaactgtggtgctgtagaagactcttgagaatcccttaagcatcaagtagatccaatcagtccatcctaaaggaaatcaaccctgaatattcattggaaagactgatgctgaagctgaaactccaatcctttggccacctgatgggaagagctgactcactggaaaagaccctgatgccgggaaggattgagggcaggaggagaagtgggtgacagaggataagatg…
CUFF.10273.1	chr14:38717780-38723591	-	TTTTGAGAGTAGTTGGAGGAAAGCAGTGTTAGAAACACAAAAGATGAGGAAAGAATACACCACAGCATTTGGTCTAGAAGAATTCAAAGAATGTGTCAAAATGCCATATTTACCAGGATTGCAAAATTGCCAAAAGAGTGTAAGTTCCACTCCACTAGAGTTTCGTAGAAGACTCCTGCATGCTGATACCGAGATGCCTCCTGTCAGCCATTCTACTGAGAACATATCAAGTTGCCTACAAGTATTTTATTCTCCTCTACATATTGCACAACGCC
CUFF.10293.1	chr14:39466200-39468703	-	gttagggctggaccaagtgaacaagatggagGAGAAGCTGAAAAAGTAAATAGGATCCTCGGGCAGTGGGACAGGCATCATTACTGCTGCTGCAACGGCAGAGAAGCAACCCCACGTTAACATTCCTGAGGGGAGAAATCTCTGGTTTTGTGAGTGACTGCCAGGCTCTGCCTTACACACTAACACAatcactgtgagctgctgaaaccagggaaccacgttttattcatctaccccttcctcggtccagttaccacacctggcaAGTGCAGCATCACTAATTGAGGAGGAAGGCAAAACACAGAGATACAGAGTAAGGGAGGGATTCTGATGTCTAAAACTGGGAGAGGGAAGCTAAGACCAGTCGGTTTAGACTTGCCACAGAACAGCAAAGGGACA…
CUFF.10312.1	chr14:39726636-39727809	+	GATTTAGGTATTCGCGTCCACATCAGAGCCTGCTCCCTCTGAAGTCTTCTGTATTCTTCTAACAACCCTAGAAATTCTTCAACCCGGAGCTGTGTACTCAACAGGCAGACGGCTCAGCCTGTGTATGTTGTCTAAGTGTCTGGAATGTACACCTGGTTCCTCTCCACTGGCACCCACAATTTAAGAAAGTAAATAGACGCTTTCAAGGAGGAACATGGGCACACCAGGATCAGGAGCTACTGTAGACATTTCCGTCTATTTTGGGGTTCTGTTTGATATGAGAAACTGTTATTGCTCAGGTCAATATACTTTTTTTTTCCCCCTC
CUFF.10380.1	chr14:45875714-45876589	-	AGGAGACAAGGAAGGCTGTGGAATCAGAGGAATTCTGCAATCAAGAAACATTTAAAGAAGAAAAAAAAAGATACTATGAAGTCCTAATGGCCAGCTCCTAGCTGCAAAACAAGAAAGCTCACTTGccatgcttcagggcaattcaggatcctagttccctgaccagggatcgaacctatgcacccggcattgggagtgtggcgtcttaaccactggatcaccagggaagtctcAGGAGACCATTTTAATAAATTTGAATTCAGGAAGGTAGAAACCATAAAAAatatatgtacacgtatccattctcccctaaactcccctccc
CUFF.10399.1	chr14:48258893-48312544	+	GACACGAGCCCAGGTGGGCCTGAGGAGGAGGAGCAGTGAGCATGCGCCACCGGACCTGGGGCGGCATGGAGGAGAGCCAGGAGGTGGGGGAGGAGCCTGGAGGAGCGGGAAAGAGCTGAGTTGGCGGTGTGGTCGCTAGCGGTGACCTGGACGCAGAGCAGAAGGAGATCAGTTAGACTCTCTAAaggaagctgcagtgttgtggccaagccttgtcatggggtcagaagatgagggtcaaattctaaattctccacttgaaaatcagctgactttggggtcctgacgatgctcaagcaaaattcttctcatgaaattgtcttgtaaatgacaaaggactgtaggcaaataccctcagtgtctggcaccacaccttacacagagtagctgcttaataaa…
CUFF.10401.1	chr14:48664306-48695661	+	GGATCCCGCTCCTTAGGATTGACTGGAAAGAGCAGACTGTAACTCTCTTGTTCATCGCCCTGGGGCAGAGAACACAGCTTTCAGAATTGGAACACAAAGGACTATATGAATGTTAAGAGCAGAACTTGCACACGGAATAAACTTGAAGGAAGCCATTGTTTCCAAGcctcctctgaaaaacgagaattataatggcatattacctcaaagggatgctataagaattaactgggataagaagatgaagtcctcagcatcgttcatggcataagCAAGGAAGACATGAGAAAGGAAAGTGAACCTGTGAAGATCCCAGAATTCATCGACAGAAAGGTCCTGTTCTCTCTTCCCAAGACTGGAGCCACAGAAGACACCAGAAACTGAAGAGGCAGAACAAAG…
CUFF.10401.3	chr14:48694547-48710075	+	AAGGTCCTGTTCTCTCTTCCCAAGACTGGAGCCACAGAAGACACCAGATAGGAAGGATGCAAAGAAGAGGAAGCTGACTAAGCACAAGAGGAGCAGTCACTTGACCCTTGTCTGTTAAGATGAAAATGAATGAAGGTCTGACCTGGACATAGGTGATATGGATGATGAGACATCTTTGAAATGAGGTTGGAAAGGGCAAGAAGTTGACAGTTAATTGGATGAGAAAGacccagaagcagatgctgagcctaggatttgagtacaagcaatttattatggagatgatgcctgaaaacacagatagagaaataggtacatctaacagagaaggaaaagaagtcgagaacgagcgtttgattgagcaggttaccattgtgagcgtctgggactcgtccactg…
CUFF.10411.1	chr14:49408186-49412786	+	AAGGGGCCAGCTCCCAATTTTGAGAATGTAAGAAGTCTCAGCATATGTATTTGTTTCCTCCGTTTTGCCAGCGTGGAGGGATCTACCATTTGCCTTCCTGAGATGACTGGCTTGAAGAACTGCAAGGAATGCTTGTATCTACATGAAGCTCGGAGCACTGGGCTCCAGGCCCTGCAGGGGCCGTGTGGTGGATTGCCTCGACCTGGATCCTGAGGATGTGGAAGCTTTGCTGGAAACTCACCAAGGGCTTTGGTGCGTCTGAAAGGATACATGGGAGACAAGGAGGTGAATGGGGCTGTGAGAATGAAGGATACAGATACTGTCTACAAGACTGAGTTTGGCAGAGAGCGTGCTGATGTGGAATGGAGGCGTCTTGGTTGTGTTTCGGGCTTCAATTCA…
CUFF.10429.1	chr14:49624858-49697579	-	tttgggggcggggtctaggaacttgggttttaacacgtcttccaggggatccttatgctggctaatgtgggaaccaTGCATTAGATGAGAAGAGAACGCCAAACCAGGACAGAAGGCAGCACCAGGAATCTGGGACCGCCACCGAAATTTCAAATGTATGACCAAGGAACCAGAGTCCAAGGCTAGAGCCAGAGACACCCCAAGGAGCATCTTTTATTTATTCATCATGAGGCTTGCCATCTCCAAGAAATTAAGGTGGTCGAATGGACAGAGAGAGGACCAATCGTTTCAACTAATGACTCTATACATATGCCCCCTCCCTTCACACCCTGGGGAGGAAGGAAAACTAATTAACATTTCTTTAGGCTATGAAGTCTTTCCACTGTGCCTGGGCCCAGA…
CUFF.10476.2	chr14:52661103-52687835	-	GAAGGCAGCTTACACTTCTCAGTTGTTCCAGAAGAGTTGAGGTAGGAGAGTGGTGGGCTCTGTTCAGCCTGTTATCAGCTCAGAACATGCTAGAAAATTAAGAAGACTTCTTGCACTATTCATTACCTACAACTAGAGGACAGATAACACTGAAAAAACAGATTCAAAATTTAATTACATCTGTTGAACAATTGCAAAATACACGGACCACTGAGCTTCTGGGGATTTCCTGACGTGAGCATTGTGATAGTGAAAAAGCAAGGCCCTGAGGATTCAGATGACTGGGAAAAATTGACCAGAGAATTTCCACCTCCAGACTTTCCTAATATCTCTGGACTTTAAGAGCAGTGTCTTCTGTTGACTGCGAACAGTGCAAATAAGTTACCTGAGtgtccctcc…
CUFF.10527.2	chr14:57365279-57464693	-	AGGGGGGCTTGAAGGACTACAAGAATCAGAAGTCAATGCATCTCAAAATATAGGAGCCCAGATGCTTGCAAACAGAAGATAAAAATACAAGCAACTTGGAGTTCAGGTGCAGTCGCTGAAACATTAGCCTGGCTCAGAAAGGACATAAAGTAGAAAATCCAGTATCAGGGTTACTAAAATGCCCCTAGGGAAAGAGGGGGCGCTGTGTTCTGAAAGCGGGCATGtagtcaggccactcaagatggctgctcttttgctctatgtccatcccctgactgaccagtgcctgcttcacctataccctaacccctctctccaactgaccttccgagtacttgccccaggccccagctggtgatccttctcatcaaagaggcgggaaggggcgtgcccctctgc…
CUFF.10539.2	chr14:58967940-58977000	+	tggattggcttttgtgactgagctttgtaagtgacagggcgtcacctgtcgcGAAGGCCAACTTCCATTGAAGAAGGGACTCCAGACTCCAGGTCTTGATGGAGGGAAAGCTAGGTTGTAGAAGAAATACGAGGATAGCAAACAGTGCGATAGCCGTTTTAGGGAACAACAATCCTGCACAATCTTGGGGACTAATTGGAAGGGGACAGTGGAAGAAAGTGAAAAAAGAAGAAAGTCATTTACATAAAAGCAACTTTGAAGGTTGTCTTAGAATATCTGAGGTCTTGAGAACCACAAAATGGAAGAAACTTGGATTCCTCAGTTCTATATGAAGAAAGTCAGCCCCTGAGCACAAAC
CUFF.10548.1	chr14:59621525-59622763	+	AGGAAGGCTGGTACCAATCGCACCAAATGCACGGGACAGgggagaaggcagcagaagactcagaagcggagggaagatgccctgagaaggactcgatggctattcctggctttggatatggaagggggctgctgctgctgctactaagtcacttcagtcaacaaatagctcaaactgagggagatggaatgacaagaggcctctggagggaacacattcccactgacacccggtttcaacccattgagacgccttttggactctgacctccaaaacagtaagatgataaatttgtattaagtttgtggtaattagttaacagcaactctagaaatttatacaGGAGAGAAGCTCATTATAACAAAGGCGACCC
CUFF.10566.1	chr14:59774380-59969748	-	GAGGAGGCAGCGACTGCTGAGAGGAGAGCTAGTAAGgttggaaatggcaaTAAGGAAGACCCTCTTCCAGCACTAAGAAGCCGCAGCTGATGATCTGGCGGTGGTGGGGACACAGTGGACACATCAATTGCATGCTGCTTTTGTTGATGCTCTTCCACAAGGCCCAACTTTACTCTGAAAATAATTGATGTTGGAAGACAAGCAAGgcattatcccaggaattttcatcttagaacggctttgatgcatctcataagttctgg
CUFF.10566.2	chr14:59961852-59969745	-	GAGGCAGCGACTGCTGAGAGGAGAGCTAGTAAGgaactttcttaaatgcctagtgcagaaaagttcaacccacttaaaagatgtaagatggtacgatagcaacccagagacactttaagaaaaatctgtgaaaaagaagaataaagttaccaacaaagaacactcgccagaaaaaagctgccacagagcaggtgaaaaatgtgaaccttcagccaaaaacttaaagaaacatcacctctatgaataagaagggagcagcagatattccagggcgagatggcaagacaCCTGTCAAAGACACAAAAAAATTACAGAAAAAATATTAGAGGTAGAAAAATGGGAACAGAACAGATACATCTGGTGGTATTCTCAAAGAATATGAATGTATAGTTGGAAAAC…
CUFF.10566.3	chr14:59961852-59970457	-	gcagtgaggggagccgaggacatgaagccggtggtcgggcagaaccaggtgaaaacccagactgcaggaactttcttaaatgcctagtgcagaaaagttcaacccacttaaaagatgtaagatggtacgatagcaacccagagacactttaagaaaaatctgtgaaaaagaagaataaagttaccaacaaagaacactcgccagaaaaaagctgccacagagcaggtgaaaaatgtgaaccttcagccaaaaacttaaagaaacatcacctctatgaataagaagggagcagcagatattccagggcgagatggcaagacaCCTGTCAAAGACACAAAAAAATTACAGAAAAAATATTAGAGGTAGAAAAATGGGAACAGAACAGATACATCTGGTGGT…
CUFF.10584.2	chr14:60731157-60881692	-	GGAGAGAGGTGAAGGTTGGTTGGTGCAAAGGCCAGAGCTTCTGTGACTGttctaaaagctgagaagttcaacatcaagatgctggataattgggttcctggtttgcagatggatacctttatgctgtgtcctcatatataagaaTAAAACTTCAGAGAGACTGTGCACAGAATGAAGGAAACAGTTGTCTCCGAATGCTCTGCTACACACGTGAAACCACACCACTCTCCTTATCACCCAGTTATTTCAGTGAAAACAACATGAGTTTACTTACAGGTGTATTCATTTTATTGTATTCCACCTG
CUFF.10584.3	chr14:60860154-60881694	-	GAGGAGAGAGGTGAAGGTTGGTTGGTGCAAAGGCCAGAGCTTCTGTGACTGGAAAGGAAAGAAATTGTTGGGAAGTTGCTCTTGCTATTGCCTTGGGAAACAGTGCATGACCTACACCTGCCTGACTCAGATCTCTGATCCAGGTCCCCTAAAGGACAGAATtcagttcagttcagtttagttgctcaattgtggcctactctttgcgaccccatg
CUFF.10613.1	chr14:63304070-63309224	-	gtggtctaggaccttccttcagactgtaagttgctctgtccagtaagtcactgatgtctctgctgccctctcaggATGAGGAAACCCCCGGGAGCTGAGATTAGGACACAGGGATGGGGGAAAAGAAGGCTGTGGGGGAGATTCCGAGGAGGCCATCCAGTAGCAGGCGGGGCCCTGTGGCAGCTGTGTACCACGAGAGggttgttcctgagacctttccaaggcggacaatgcctgctctggcttaccacctgcagaaacatcttggcttcctcagcaaccagttcacattccttggcttgcctgtgccctcggtgatcactgtttatcagataattctaaacaagttctgacacaggcaacctggcaaactctcaccacccagtgtcatctgcaaat…
CUFF.10758.1	chr14:70455458-70456478	+	GTCTATTTGCCTGTCTAAATCAGGGAGGGGCAGAGAGGTTATTTATAGTGTGAGAGTTTGTCAAGCTTTATTTGATGGCTTTTTAAGTATTGAGGAAGGGGGAGCAGCATTTGGAAATCGTGGCATTAGGTCCCTGAAAGGAAAAAAAGGTCTTTCCTCCTGGtgaacgtgtctgtgtgtaaaccctggcctgattcttaggatTCTCGAAGACTTTGCTCCGTTTTTAAGACAAGCCC
CUFF.10763.1	chr14:71127467-71134885	-	taagtggaagGAGAAGGACAATGGATCCCTCCTTGATGGAAATGATGGAGGACGTCCAGGAGGAAGATGGGCAAGATTTTACTGGACTCTTGGGTTAAACAATTCGAAACTGGTAGTGTTAACAGGAAAATGAGCTGTTGAGGGAGAAGCTGCACCTTGAAGGGCTGGTTTCGGCAGACTCCAGCCTGCCCCGAGTCAAAGTGAGCAAGGTGTCTCTCTGTACCTGAATCCACATGTGTGGTTATTTTCTTTCCTTACTTTCCTCCCTCACTGGTTTTTCAGGCATGAAACCAGAAACTGAGATCTCTTCTGCCCTCGAGGAGAATAGATGTTGCTCACTCTGGGAACCTTGACTCTATGACTTTAATGGATTGCTCAATGTCTGGTATATACAGTTTT…
CUFF.10763.2	chr14:71127467-71134885	-	taagtggaagGAGAAGGACAATGGATCCCTCCTTGATGGAAATGATGGAGGACGTCCAGGAGGAAGATGGGCAAGATTTTACTGGACTCTTGGGTTAAACAATTCGAAACTGGTAGTGTTAACAGGAAAATGAGCTGTTGAGGGAGAAGCTGCACCTTGAAGGGCTGGTTTCGGCAGACTCCAGCCTGCCCCGAGTCAAAGCATGAAACCAGAAACTGAGATCTCTTCTGCCCTCGAGGAGAATAGATGTTGCTCACTCTGGGAACCTTGACTCTATGACTTTAATGGATTGCTCAATGTCTGGTATATACAGTTTTATGACTGCTATGCTTGTTGGACGGAAGGTCCCCATACATCAGCTCTCTCGTTTTTCTATATTCTTTCATTTTTAGTACTGCT…
CUFF.10763.3	chr14:71127467-71134885	-	taagtggaagGAGAAGGACAATGGATCCCTCCTTGATGGAAATGATGGAGGACGTCCAGGAGGAAGATGGGCAAGATTTTACTGGACTCTTGGGTTAAACAATTCGAAACTGGTAGTGTTAACAGGCATGAAACCAGAAACTGAGATCTCTTCTGCCCTCGAGGAGAATAGATGTTGCTCACTCTGGGAACCTTGACTCTATGACTTTAATGGATTGCTCAATGTCTGGTATATACAGTTTTATGACTGCTATGCTTGTTGGACGGAAGGTCCCCATACATCAGCTCTCTCGTTTTTCTATATTCTTTCATTTTTAGTACTGCTCTTATTCCTTACTGAAATATTTTTATGAAATCTCTCTGTTCTCAACATTCATTCCATAAATGACCAGCTCCAAGG…
CUFF.10763.4	chr14:71132320-71134908	-	tatggacattctggggacccagctaagtggaagGAGAAGGACAATGGATCCCTCCTTGATGGAAATGATGGAGGACGTCCAGGAGGAAGATGGGCAAGATTTTACTGGACTCTTGGGTTAAACAATTCGAAACTGGTAGTGTTAACAGGTACATGGCCGTTTGGCCAAAATGGTGATTGTCAACGTATCTGCCTCTATCAGGCTGATGAATCAGGATCAGGTCTAAAGGAAAACCCAGAGATTCCATTCAGATAATGAGAACTCTGGGTTACTGGGTTACCATGGAACTTTCACTGAAATACTAGAGTCAGCCAATAAAAATTTCAGGTTGTATCTGATCAGCTGTCATTTTGCTGGGTTGGGGAAAATAATGAGTTTAAAATAGTGAAAAAGAAAAAG…
CUFF.10815.1	chr14:73073713-73077707	+	ggggcatctcatctcatctgctctgccctcacgtggcatttgcatcacgattccccctggttctcaggtcttcagcagcagattggattatcccactggatttcctagggtattatattgagacatccagacatgcagtGTGGAAGAGCATGATGTGCTGGGTTTTTTTGAAAGGATATTCCAAAAATTGATTGGTGccatctgagcatctgcttcaagacccacctgacCCTGTTGCTGGCATACATAAATGTTGGGACTTGGATGATGTGGGAGCACGGAGATCATGGAGATCTGCTCCATGGTACAGgaaaacaggagctcaggaccaaccaccaaaagccaaatatgctccttataccaatctcagaagatgccctcctggctagcctgctccag…
CUFF.10817.1	chr14:73112024-73113674	+	tgtgtggttgtgtgtgCGCGCCTGTTTGCGCTTGTGCTCCTTTGTTTATGGCAGTTAGAGataatataaaataaaaactaaaaattaaaGCAAGCTGATGTTGAACCTCAATCATGCAGGGAGGAGGTTCATTCTTTCTTAAAGAAAGTTCTTACAAACTCCACTTTGGGGGACAATTATTATGTCAGCAGCTGTAAGAACAACATTTTAACCTTTCCGAGTAAAACAAATAAGCTGATAAATAAGTAAtaaagaaagctgagcaatgaagaatcgatgcttttgaactgtggtgttgactgcaaggagatccaaccaatccatcctaaaggaaatcagttctgaatattcattggtaggactgatgctgaagctgaaactccaatacttgggccactt…
CUFF.10818.1	chr14:73148014-73148902	+	CTTGCGGGCTTTCCCAAGAATACATGATGGAGAAGTTGTCTCTTTGGAAACAATGTGGGAGATTGATCTGATGTAGCAGTGACTCCTCCAGGAGATTTTTAGTGCCAGGAAAAGAGCTTCTCAGGTGTCTGGAGAAAGGCAACTTGGGTGGTGAACCATGAACATGTTTCTGGAGCTATTGCAAGGCTCTTCCGGAGGTCAACGGGAAGGACAAGTGGAGACCAGTGATGTTATCGATTCCAAATTCAGCACTTGAACATCTGCATTGCTCATTGTCTCTTAGTCATTCAACGCCTCCTGTTATCGCTGGCCAAATGTTGTATGTgcatacctcagagatattgcaagtctggttccagacaactgcaataaatctaatagtgcaataaagtgaatcaca
CUFF.10819.1	chr14:73524652-73527713	-	GGTGGCGGAAGAGAATCTCAGCGAATCATCCAGGTTACGAATGAGCAAGCCAGCAGGCTTGAGAAATTCTGAAGACGTTTCACATAGGATCCGTCAATTGCTCAGAGGAATGATAAGCCAGGTTCAATCGTGGGGCTGCAGAGAGTGGAGACTGGGTTTCCATTCTGCGGTCGACAAATGCTCCAGTGTGCAAGCTTTTCTTCAGTTCCCGCACCTGCAGAGACGTGGCCCAAGTGACCTAGTATTTCAGAGGGAGAAGGAGAATGTGGCAGAGAGAGAAAACTGCTCTTCAAAAGGAAGCCGTCGTTAAGCTAAGATGCACAAAGAGCAATTGTGAATTTGTGTTTAGGGACCTAGAATTCTCACCACTACCCTGATGGAATATAAAGGTGAGAGGTA…
CUFF.10823.1	chr14:74060374-74095830	+	aaccgcgatctgttccaatggcagaagaaaaagaaatctttggacttattgagaaacggtgtgtggatatcgaatgtggcacttcccaagagatttttaaagGTAACGAAACACACAAGGAGCAGATTGCCTGATTCGAAAGTCTGGAAGAGCAAATGGACTGAAGAACACCATCTTTCACACAAGGCTTCAGGAGAGTCCCAGCACCCCTCTGGACACGTGACACATGATGGTACAAGGTTTAGAAAAGGAAAATCTGTCCCATATCTTTATTGTCAATTAGTGTTCACATGCAGAATGCTACAGGGATTGTTGAAAACAACTAGTTTTCATTACctatatgtcagtcactgaagtgctttatatgcatgttatcatttcatctccct
CUFF.10852.2	chr14:75673136-75676846	+	TTGGGCGGGGCGGCGGGGTGGCTCCGTCAGCTGATGTTTGCATGTGAGCGCTAGTCTATTGGCCCTGACTTGAGGCGTGCAGAGATGACGTAGCTTGAGGCGTGCAGAGATTACGTAGAGAGGAACCGTTTTGGACGTTTGTTTTGTTGGTTAATCAAAACATCTTTCCCTTTTGGTGCTATTGTTCAGAAGAGTTGTTCAAAAGGTCCTGATACCGTAGGTCCAAAGGAAAACAGCTAATTGAGAAAATGCCGCCTCTTGAAACGAGTATAGCGGTGGAAACAGATATAGCAAGGATTAAGTATCATATCGCACCAGAGCTTAAAGACCTATGCTTAATGATCAAAATTGCTCTTGTCGGAGCACTTGAAAAGTGTGAGAGAGCTGAGAGAACAGAAA…
CUFF.10906.1	chr14:83077483-83081365	-	gcctgcccattcaagagatgaaggagactctggttcgatccctgggttggaaagatccccctggaggaggaaacgtaaactcactccagtattcttgcctggaaaattccatggacaaaggagcctggcgggctacagtccatggagtcacaaagagtcagacacgactgaagcgacttagcacgcatgcatCACTCTACTTCTGGGAACTGTTTATACTCTGCCTACGCCCAGATATGGGTTCCTCACGGCCAGCCGTCCAGTAGgacggctacagtcatctgagatacaaagctaaccatgtcagtcttctgattaaaatcctctgttggctctccatcAACTGTAATTTAAGGTCCAAGATAAAGCTTTCGTTCTggggctggacttaccttcctc…
CUFF.10906.2	chr14:83077483-83081365	-	gcctgcccattcaagagatgaaggagactctggttcgatccctgggttggaaagatccccctggaggaggaaacgtaaactcactccagtattcttgcctggaaaattccatggacaaaggagcctggcgggctacagtccatggagtcacaaagagtcagacacgactgaagcgacttagcacgcatgcatCACTCTACTTCTGGGAACTGTTTATACTCTGCCTACGCCCAGATATGGGTTCCTCACGGCCAGCCGTCCAgacggctacagtcatctgagatacaaagctaaccatgtcagtcttctgattaaaatcctctgttggctctccatcAACTGTAATTTAAGGTCCAAGATAAAGCTTTCGTTCTggggctggacttaccttcctcccat…
CUFF.11030.1	chr15:10164571-10303738	-	AGGGGAGATACAAGTTTTTCAAGGTAGAAGATGTATGTGGTGACCTTAAAGGATTGCTGTTTAGTGTCACTCAAGATCTACTAAGCATCATTTTTTGGATGACTGTGGCAAAAGGATATCTGTACAAAACCAGTTCCTTTCTGAAGTTTATAGTTGGGGCCCTGTTCTCAGACAGAAGAAAAGCTCTTCAACTACACAGAGAGGAGAGATCCTGCCACCATCAACTGTATCAGAGCAGCTGCACTCCACAGCCCCAGGATGCTTTTGAAACTTCAGTCAACGTGAATTGTACCCTCTGGAGATGTGAACAATCCATGTCACTTTACATGGTGACCTCACTCATTTTGTAGAACTTGTGCTTTGCCTTTTGGTGGGTTGAAAGAATATGAAATAAATGGA…
CUFF.11030.2	chr15:10236141-10303738	-	AGGGGAGATACAAGTTTTTCAAGGTAGAAGATGTATGTGGTGACCTTAAAGGATTGCTGTTTAGTGTCACTCAAGATCTACTAAGCATCATTTTTTGGATGACTGTGGCAAAAGGATATCTGTACAAAACCAGTTCCTTTCTGAAGTTTATAGTTGGGGCCCTGTTCTCAGACAGAAGgaactcaggaccacactcaggtagaggataacttaaggctgagcacagatgaagaaagcccagactagttggaacctgaaggctgatgactgagattcctggatcactaccctgttacctcactatcaaccaatcagaggaaagttacaaccactccaccaccaccaccaccaccacc
CUFF.11034.1	chr15:10622116-10711870	-	TCTGTGAAGGACTCGAAACTCCGCAGTTGGTCTCCTGCCACAGGCTGGGCTGCACCTGAGCCTGGGCTCTTGTCTGAGCTGTGCCGACGGGCAGGAGGATGGTAGACGGGAATTGAGAGGCGCGGAGGAAGGACGGGGAAGCCTGGCGTCTCCTTGTTGTGATCCTGAAGAGCAAGCCTGAGGTTTTCCTTATATATCAAGTGACTTAAAGAAGAAATAAAAAGAAACGTGAATCTTGAGAGAGAATGATGACTTTGTCAGAAGGATGCAGCTTGTGATAAAAGGTCACTGAAGTGTAATGAAATGCAGAAAATGGGAGAAATACAACACAAATATAATAAACAGAAGCTTTAGAAAGGAACAGCTCTTGATTAGAGTGGCAAGTGCACCTTTTATGTA…
CUFF.11041.1	chr15:14022550-14042552	-	TGGAGGGGTAGCAGAGATGAGGCAGAAATCTCCTGAACTCCTGCAAGAAGTGATGTGACTTTCAACGGCGATAACAATAGCATCAGCAGCAAATCAAAGATCAGAGTTAGAGTGTCAGTAAGCAGGGGACCTGTGCTCCTCTGGCTCAGAAATAGGgcatacgtcagagatattgcggattcacttcaagatggctgcaataaagtgaatatca
CUFF.11042.1	chr15:14068473-14068985	-	ggagttgagccatcacaggaccttcttggtcaagtttgtgttttccctggcaattaaattcctttaaCATCCAGCAAGTGCCAGAAATCTTACTGAGTCACGATTCCAGAATCCAGATTCTGCCTCTGATGTTTCAGTCTCTTGGCAACAGCAGTTGCCTGTCCCTGAAGCGCTAGGTCACAGTTGAATACTTTTGTTTTTGCTGCTACCTGTGAAACAACAGCGTCGCCTCTCAGGTGCACGGCTCGCAGCCGGGACTCCCGCCGCCTCCGGCCCCACCCGCCGCCTGCCGCCCGTGGCCGAAAATCAACATTTTAAAGTTGAAATGTTTTGAATTTTGAAAAGCCTGTATT
CUFF.11176.1	chr15:23109498-23110850	-	GAGCAGGTCTTACATTTCAGATAGCCACAAACACCTGCACTGCTTCCTGCTCCAAAGGCGTGACTGgtgggcatcatcccatccactgagggcctgcctggaacaagaaggaagaggaagggggaattcgttctccctgctggagctgagacatccatctcctcctgccctcagacaatccactttcctggttctatggggaccttcaccatcatcactccctccttggctgcctccctggttctcagcacttcaggctcaatctgacctaaaccatcagctccgctggttttccagtttatagactgcacatcatgggactccctggtccccaaaaccacacgagccaattcctacaataaatcttctcttatgtatatatctttacagatcttactg…
CUFF.11227.1	chr15:26495560-26496725	-	GGGTGGGAGGCAGAAAGAAAGAGGAGGGGTTTGTCCATGGCATTAACCCAGTCCCTCGTACTTGCTGTTCATGGGGATACTGGGCTGGCTGCAGTCTGGAATTAAGTGCAAGGAAGGGAGTGAAGAGATCTTGCGAGAGCCAGCTGCTTGTTTAATGTGGTTGGGGGCAGGGGCTGTAGGCTAAAGTCCTGAAACCTGGAGCAGAGGGAAGACCCTAGCCTCAGAGTATTAATGAGAGCTGGATGGAGACTTGAGGCTCCCAGTGGAAAAGAAACTGAGGTCTTGAGAGTCTGAACTGATGCTCCTTGTTTCTGCTCCTGAAGAATTTAGAGTTTGGGGGGAAAACCTTTCAAGTGTTAACAGCTGACGGATATAATCTCCAAGACAGAAG
CUFF.11228.1	chr15:26543514-26544608	-	TGATCCCCTGCACTTCAGAGCTCCCGCTCTTAAAGGGAAGCCTTTGTCTTACACGCTTTGTGGCATCGGTCAGCACCTTAGGAAGCAAATGCTACGTGTTGGAAGGTGATGCTGATGGGGAGGATCGTTGAGACTGGTTTAGGCAATTTTATCTGTTGGATTCCATCCAGTCAGAAGGAACTCAACATCCTGCTCTCCAACGTGCTGATGATTTATTGCATCTCATTCTCCATCCAAAGAAGTCTGCTGCCTGTTTGAGCCCCTCCATGTGAAGACAAGTCCTGCCACCTTAATCCCTGGTCACAAAGCTGAACTAAGGAAGTTCTCACAACCACCATCTGACCCCTGAATCTGTCAATAGTAAACCCAGAAAGATGTTTCTTCTTTGATTAAAAGCCC…
CUFF.11230.1	chr15:26662611-26671078	-	AGAGGGTGCAGAATTGAGAGTCCCGCCAACAAGGCTTTATGCCTCTTTTCTTCAAGCAGAAGCAGATCCGGGAGGACTGGGGGCTCATTCCACTGACTCATCTTCGAGGAAGGACCACAGAGAAGAAGCAAAGACTCTGAGAGGGGGTCTGGCATTTCCAGTCCATACCAGGAAGCTGAAGTTCTCCTGCGGCCCAAAGCACGGCAGCCCCTGGCGGAAAAGTCAAACCAGCAAATAGAAATGTCACTCAATCATTTCCCCGTGCTTTCCTCTCATTGGCCTTCTCCACCGCATATAATGAAAACTGCTTTTTGCCCAAATATTGTTTGAATTTCAAATACACAATTTCCCCCAGGGGTGACCAGATGAAAAGAGAACTCTGGTTTGCAACATAAGACC…
CUFF.11233.1	chr15:26948327-26949077	-	CAAGGGGGAGAAGAGAGGAGGACAGAGTAAGAGGAGAAGGAAGAATGCAACCACACCTCCTGCTAAGCAGCAGCAACAGATGGATGCAAGAGAGCACAGAGATCTCAGGGACTGGCCCATGGTAGCTCAGTCTGGTTTGAGTCCAGCTGTCCTATCCAACAGCTCATCCATCTCTCCTTCATCCAGACTTAACTGATGAAAATCGCTCACTGTGGAACTGATCGAAGTTGAAAGGATGGAGTCCTGGAATGACCAACCAACAACCAAAACTATCCATGACCCAGACCTTTTGCCTGAAGctcatcacaacagtgcaaactggctatcggtttcccctgggaaaacaagctcagcgag
CUFF.11275.1	chr15:28887135-28888014	+	TGATGCCCAGAAATACGAAACATCTGAAAGGTTTGTCAGGCATCATGACAACCCCATTCTCTCCCTATGTTATGCAGGCACCCAGGGCTTCTCTGCCTACCTACCCTCTCCCCAATGCCCATGGGTCCTTCACCTGCTTCCCCGAAGTTGTGTCTGCCAGGTCGAGATTTTAAAAACACACTCGCTGAGCGCCCCCCCTCCTGCCTTTAATTAGACTCTGAACAGAGTGTTAGAGATTTTTCTTAATGGTTTGACGAAGCCTTTTAATTTGGTCTTCTCAAGAGAGAGGAACCATGAGTCCCCATCCAAGAGGTTGGGGTGGGAAATGAAAAAATCAATGCAACCCATTATTTTGGCTTTTAGAAAACAGGAATTTTAGTGCCGGGGAAGCTTGTTCTT…
CUFF.11384.1	chr15:30598474-30602658	+	GGTGGGGGCGCTCCAGAGGAGGAAGACATTTGTCTTAGAATTGGCAGGAAGAAAGAGGGAGCTACTAAGAAGGTCCGAGAGTCAATCTGAGGAGTGTTGAAACCCTGCCCCTTCCTGTATCCCTGTGGTAGGACCTATCCTTAGACAAAATCATCATGTAGGCTTCGGGACAACTCTCAGGCACTCATTCAGGACCTGTGGCTGCTCGACCCCTTCCTTCCAAAGAATCaactaacataataaatgcatactgcacgc
CUFF.11385.1	chr15:30677625-30685780	-	gggagagggctctgcggcagggatccaagGAATTTCAGGTGTCATCTAACACGGAGCAAAAGAAAGTGGAGCCTTCCTCACACCTCTGAGATCCCAGagggaaacttggaaacagacacccaagagaaagctatgtgaagacagagacagactggagtgatgactctacaaacccaagattagcacgcattgttgggagccacaagaagctaagagaatcgtggaacatggttttctcttgaacctcagaagaagcatgaccctgctgtcaccttgattttggcaccgtgccatgaggacactaaagcattcctgtgaagagccccacatgtacaggaatgagccctcccaccaccagccagcacca
CUFF.11427.1	chr15:33040061-33061971	-	aaaccacatctcctggaatagcaggcgggttctttaccactgagccatcagggaaATGCAGCAGTGGATCACCAGGACAAAAAGGGCCAGTGGAAGAAAGAATTATTGGTGTAGCAACCAATAGGCATACTGATGAATTCTGGTCAGAAGATTACAAAGAAGAACAGAAGAGGAAAAGATATAGTCAAAGGATCAGCAGTGGAGACATTGGAAAAAGCAGGACCTCACACTGGAAAGTCTCAAAAGGAAGTGAAAGCAGGAGCCAAACTGCTGGGCCCAGAGTGGGTGGAATGAAAAAGATAGATGGTTGTAGAAGAGATAACTAACGAGGCTCTGATAACTCTAATTTTCTGGGCCTTGGTGAGCTTTGCCTATGCTTCAACTAAATGGAAATATAAA…
CUFF.11433.1	chr15:33173061-33208093	-	GTTCGTTGCATTTCCTGGGTGGAGGAGGAAGGTGAAAGGATGCTCGCAGagaccaacaaccatctcttcctgccactttgaattagacttctctggatatctcaggtatcatcaaacaccttcaagtgctggattatatgtcttcttccttgttttaaattttgtactgctagcttttttttttctgttccagttgtgttggctagtacctcccatacagtgttaagtaatagtgatgatggtggacccattcttTATGTTTTTAGTGGGAATTCCTCTATGGAATTGCAATTAAGAATGATGGTTGATTGGAGCTAAGATGGAAATATTTAATTATATTAAGAAGGTACCTGACTCTTTTATTGAGGTTTTTTTAAATCAAGAAAGAATGATGACTTt…
CUFF.11457.1	chr15:34142196-34143928	+	AGCAGTGCTGGGAAGCAAAGCTCTGTGGCTGAGAGAGTGGACCCACTGTCCACACTAATGCAGGCCCCTGGAGGCTCAGAGGTAGAAATTGGGGATCGGAAGTGGAGGCCGAGAGAGGGATTCCTCCATCATCACCCCTTTCCATTAAGGATACACCTTTCTCCCAGGGTGCTCAGCCTCATCTAAGACTGTCATCTGAACTGAGACTTGGTTTCCCGAAAAGATAACCCTAC
CUFF.11476.1	chr15:34484238-34488604	-	tgatggggacgcttctctgcagatatttgagctgagactgaggtgatgaaaaggaaccggacatacagacatctgggagaaagttgtttcaggaagagaaaacagaaggtgcaaagttccagacttttgagtgaggttggcatgcttcaggaaccaaaagaggtccacctacgtgtctgacctacggcaagggaagtggatatctcaggagCAAAAGCAAATCTTCTCTGCAAGAAAAATTCTCCAGTCTCCATGTTAAGCCTGCAGATGTTCCATCTATTATAACAAACAGCGAGC
CUFF.11523.1	chr15:37493710-37539416	-	GGATGGGAAGATGTGCCTGGGCTTCCACAGTGCCTCTGTGAAAGAAAAACTGAGACAAAAAAGAAAAACTGAGACGTTTCCTCCAAGACGTTCCTGCTCTCAGAAGGGGAAGGAGAGGatgataactcccatctccaggtctgttTTTGAGACCATTCTGAGATTTGCAGTTTGTGAAGCATATGGAAGGACTTTGCAAAGTGCAGACAGTGGACGTGGGAACTCTTCATCTTCCGGGTAGACCTGTGCTCCTTTAGAAGGAACGTCAAGAGGATGGCAAACCACTGGTACAAAGACCCTCATTCTCTCAAATATCGACATGGGCTCAATTTACAAGCGGATTAAAACG
CUFF.11566.1	chr15:39313229-39352043	-	TAACTGCTTGTGGACAGCCAACCCTGGTTAGGGAATTTTCCAGTAAGGCCCTAGCAGCTGCTGGGACCACTTGTCTTGAGGATCTGCCCTTCAGAATTTCCTAAAGCAGCACTGGCTGCCTCAGTACATGGCAGCTGGAATAAGGGATCAGCATTTGGTAGTCGACGGGCTCAATGCAATAGGgacaaggaagagGACTGACAATTAGCATAAGAACCTTTCTAAAAGGTCAGCATCCCACATACCAGGACTTATTAAGAAGAATGAAGGAATAGAGACAAAACTGAAACTGGAGCCCCCAGCTCTTCTCTTCTGTGACCTACCCACACACACTGATAAAGTTAATTATCTGCCCTGGCTAAATGACTTTCCCTAGCAACACCCTAGCAACTAACATCA…
CUFF.11660.2	chr15:43502295-43506471	-	TGAGCTGGAGGGAGATTTTCAAAATGCGGTCCCCTAGCCTCAGCCTCAGCCAGCGCCAGCGTCCACACAGTTCCTAAGAAGGGCTGCTGCCAGTGTCTGTCCTCAAGGTGCGCGGCAGCTGTGCCCCCGCCTTTCCAGGAGACTCTCCAAGACCAGCAGGTCGCTACCCTTCCTGTGTCAACCAGGCCCACCCTGGACTGAAGCCCACAGTCTATCTTCAGGGCTGCCAGGACTGCTGCCAGCCCCATGCTCACCTGTTCGCCCACCTGCTCCGGAGCCCAGGCCCACCCCCTCCTCCTAGCAGCTGCACAGTGCTGCCAACCTTGGCTGTCTGCTCCCCCACGGAGGGCATATGCATCTGAAATATTTCTTCTCAGGGAGCATGCCCGGAACCCAGAA…
CUFF.11686.1	chr15:44248234-44250122	-	AGAAGGGCCAGTGTAGCATCAGTTCCCAAAAGCTATGCTTCTCCACTGCTGAAAGAGTCAGTGGCGGTGGGACACCCTCCTGGATCTAGGAGAGTCTTGGGAAGGAGGGGTCTGACCCCACAGAGTCTCAAGGCTGTTGATCTGCCTTTCTCCACTGTGGGCAGGAGGCTGGAGTGGAGGGAACCCACCGGTTGGCTTAAGGACTCTAAGATAGAATTTGTAGTTTAAAATGAAATAACCAAAACTGTGAGCACGTTTGTCTGAAGGAGACAGGACTGCTGAGAAACAGgagctcacagtctactgaagacagagacaagtgtgcaagcagagtcaaaatagcaggatgggaatggcaaggAAATATGTGTGCAAAATAAAGGAACAAGTAATGGCTGC…
CUFF.11712.1	chr15:44755330-44760193	+	gggtctggagggaggtaattaggttgaatgaggtcatatggggggggccctgatccaatgggaggagagtccttataggaagaggcatgggagagctccctctacctccgtgttgcgaggactcagtgagaaggcagctgtctgcaagcctggaagaaggccctcaccagaagctgatgctgctggaccttgatcttgaacttcccagcctctggaattttcctggtctccagacccatcactctcctgttcatcccactctggaccacccaggtgtcaaagcctctgaagacatggccttgaaactgagcgcatcactgaagccacggttgagcagtgGGGCAGAAGCAAACCTCCCGGCCACTCCCTGTGACTGGGTGTGCTCTTAACGCTTGATGC…
CUFF.11770.1	chr15:46353298-46358211	+	GGACGGAGTATTTGAGTTGGTCCCTGTTCCTCTCCAGAGGCTCCGTAGGTGACGCGGACTCTCAGGAGCACCGAACCAGAAGCAGACAAGGACGAGAAGAGCTGTGGCGGAAGAGAGAGGGCCAGGTGTCGAGAAGTCGTTCAGGCTTAGAAATCTCGGACTCCAGTGTAGGGACCTGTGATCagcaagggaggaccagagtgtcaaagactaatgcccccattttacagCTCAGCCTTCTCAACACTCCACACTTCCCTAGAAAAGGAGCACAAAGGAGGAAAGAATGGTCACTCTTTCCCTCACAGTCTGATCCTGGatgggatctatgacccctcctctcaaatctggctggggtgagtgtgtgcctcagccaatggagaacaacattggagaaca…
CUFF.11805.1	chr15:47405315-47409060	+	AATGGGTCCTACAGAGGTGGGGATGGAGGTGGGGTGGGAAGAGCTAAGCCAGAAGCAGCTGAGCTATCAGCAGAAGGGCCCAGTTTTGAAACCCCTTAAGGAATCTGGTCGTGACTCCGGAACTCCTCCCACAGCTGCATGCATGAGGGCAGACAGCTGGAACTAACAGCTCTTCTCCAGAACAGTGGGTGGTCCCTTGTCTAGGAGGGGTGTCAGTCTGCAACTAGAGGGCCTCAACATGGTTATTCAAGATGTCTTGTGGTATAGTTGCTCCACCATCTTCCCATACTGGAAAAGCGGAGACACCAAGATGCACAGCTGACTCCAGAATTTTGCTCCTGCTTCTAGGATAGGCAAGATGGCCAGTTATCACCCTCCTTGTGCTCAGAATTCTGCCAG…
CUFF.11889.1	chr15:53152867-53154047	+	CTGGTATGTGCTTGCTTCTCTTCAGCATTTAGGGAATGGAGAAGCCTCTGGCTGGAGGCACATGGAGACCCAGGCTTGGTTCCAGTCCCTTCCATACAGAGCCGGGGCGGAGCGGTCTGATCAGGAGACAGCAGGAAGAAAGGCCCAGAGGCAGCAAAGGGCAGTGGTTTTGGAGCCGTGGACGTTTCTCCTGTGCTCCAAGATAGTCCTGGTTCTTGGGCCCTCTCTTCAGGTGCCCAGGGTAGACTGAGGCTGAGGAGGGACCATGTGAGTTCTGAGAGACGAGCAAGAGACAGCCTGGAGGGGGCCCTGTGGAAAGAAGCCTAAAAAACCAGAGTGACGTCAGAATCCTCCCTGGGGAGTCCTGCTGCCAGTCCCAGGGTTTTGGAAAACCATTTC…
CUFF.12007.3	chr15:58669557-58671966	-	AGTGGGAGGCAACACTATTGTTGGGAAGGACGAAATGTTGAAACTTTCCTCGTAAAGGGACTGTATCATGGAGGAACTGTTTATCTGATTAGGTCCCAGACCTTTCCCCAGTATCTTTCAAATCAGAAAAATATGCACAAGGGAAGGAAAAGAATTAAGGACATAGGTGGTTTTATTTGTACTGCAGAGCCTTTGAGTCTCTTTGGACTGCTGAAGTCAATTCAGGGTGAACTGAACATCCCCTTTAGAGGATGCAGTAAAAGAACCGAGAAGAACCCTCCCGCTGGAAGATGAGAATGACAAGAGATCGACACTTTAGCTTTGGGGACTGCTATATTCAAGAGGACCAGGATCTAGTCTCTGCTGGAGACTTGTGAAAAATACAAGGGAACTTGGAAA…
CUFF.12007.1	chr15:58669557-58672288	-	TTGAGGGGTGGTGTAGATAAGGCCCTGAGGTTCTTTTTAATAGAAAGAGAAGAAAGCTATCCTCTTCTTATGTGATTACTTTCAAGATTTCCCCTCAGAGCCTTTGAGTCTCTTTGGACTGCTGAAGTCAATTCAGGGTGAACTGAACATCCCCTTTAGAGGATGCAGTAAAAGAACCGAGAAGAACCCTCCCGCTGGAAGATGAGAATGACAAGAGATCGACACTTTAGCTTTGGGGACTGCTATATTCAAGAGGACCAGGATCTAGTCTCTGCTGGAGACTTGTGAAAAATACAAGGGAACTTGGAAAAGCCACGTGAAGGAGAGAGGAGCAGAAGTGCACTCAGAACTGTGTGAAGCGAGGCCATGGTGTGAAGGTCTGTATGGGTCGACTATTAA…
CUFF.12007.2	chr15:58669557-58673432	-	taaaagtgacatctgttgagatggagaaggttgccagaataaaaggcttaatagagAGCCTTTGAGTCTCTTTGGACTGCTGAAGTCAATTCAGGGTGAACTGAACATCCCCTTTAGAGGATGCAGTAAAAGAACCGAGAAGAACCCTCCCGCTGGAAGATGAGAATGACAAGAGATCGACACTTTAGCTTTGGGGACTGCTATATTCAAGAGGACCAGGATCTAGTCTCTGCTGGAGACTTGTGAAAAATACAAGGGAACTTGGAAAAGCCACGTGAAGGAGAGAGGAGCAGAAGTGCACTCAGAACTGTGTGAAGCGAGGCCATGGTGTGAAGGTCTGTATGGGTCGACTATTAAGGGGAAATAAAGGTAGTTGAAATGGCACCATGCAGATGAAGA…
CUFF.12010.1	chr15:58775078-58778841	-	ggagatggggatgaaggtgggagaagctggtgataccaagactgctggtctgtggaccatgctgagtaacaaggCCCTAGTTAACTTTTATCTCTAGCTCCTGTTTCAAGCTGATGCATCTTAGGAGAGAAAAGGAACGGTTCCAGCCAGGCGTTGGCGCACGAAGCGTGGCATGGTTTAATAGAAGTCGGGTGACTGAGACATCTTGATGCGATTTCTGAGAAAACCAGACGGTTCATCACCTTTAATAAGTGGGAAACCTTTAATGAGTGGGAAGCAAAGTTGCCTGCAGGGTCAGCCATGGGCAGGTGGATTTATACCTGTGCCTGGGTTTGTTCCATTTTTTTAAAGAAGGGCATTCGCGTGAAAGTTGCCTTTTGGAACAGAGAGAATACAAAG…
CUFF.12012.1	chr15:58779532-58788834	+	CTCCTGCCTCCCAGTCAGCAGAGAGGAATGCCTTCTGGCGAGGGTTACCCCTGAGATGTCAAGAGTCACAGTGAGCTTAGGTGTGCCAGCAAAGGGGAGCTTTTTAAGCCTTCAGGCATCTGTTTTGCTGTGAGACTGAAATACAACCCAAAGAACTGCTAAGAAAGAGAAATATCAAGACTCTACTTTCTCCAAAGAAATCTCGATTAAAAATTAGttttacagaggcaaaactcttctgagtaccttcccagatggctaggattacaaggcttggactctggtggaatcaggaagtattatcagcactagttattcagatgggagactatcccaggcccctgttactccatcttgaccagaagcaaaagtctTGAATTGgtgtccttatgtattttc…
CUFF.12012.2	chr15:58779560-58788834	+	TGCCTTCTGGCGAGGGTTACCCCTGAGATGTCAAGAGTCACAGTGAGCTTAGGTGTGCCAGCAAAGGGGAGCTTTTTAAGCCTTCAGGTAATAGAAGTATACAAAACAAAAGTAAAGTGTTTCCTAGAACCCTTCCTCAATTCCAAAAGGCCACGGGTTGCAGCCTTTAGGTCTAACAAAAGTTTTTCAGGAGGAATGATGAATACTCCTTATGTAAGTCACAGACATGCCCCCGTTTTTAAAATGTAAAGTTGGGGAAGTCAGAATTTGTAGGAGTACATCTCAGAATCCAGAGGATGTAGTAGACCAGTCCTTGACAATTTGATTGGCCAGGTTTGCTCATGGATATTAGTAAATCAGTCTTTAGATGGCTCCCTGCAAGTGTATATGGTGTTCATC…
CUFF.12036.1	chr15:59074695-59091592	-	GATGGCTCTGAACTTGCTTCCAACTTCTCCAGAATCTAATGGCTTCTAGGGGAAGCTGTGTTGCGGTGTGGCTCTAGCCCAGCCTCACTCCACCCTGGCAATCGTTTCACAAGAGCTTTTTGGAGTTAACACCCTCAATCAAAAGTGTGGCTGCACGTGGGAGAATTCCCCAGGACTGCTGCAACAGAAGTTGGAAAGACTTTTAACACACTTTAATTATACGTGGAGAAGCCATCAGCCTCGTCTAACCTCACCTCCTGGGACAACCTGGCTTTCTATATAGGTTCTTTGCAAAGCTTCTTTTTTTAGATTGGTGTTTAAAGGTTTTCACTCCAAGCGTGGAATTGGATTTCGGttttttttttttttttttaagtttaaaaGCATTTCTCAGTGAAT…
CUFF.12056.2	chr15:60081922-60095389	+	AGAGGGAAAGAGAAACAGAGAAGGGAGGGAGTAACATATGTGCTTAATATGTGTGCTTCTGAGCACACTGAGGGCCACCGGGCACTGTGTCGAAGCCGTCTCAAAGGCTAGGTTTgttgggatatttatcagccagttaccgtcatcattggtggttatctgtgcctgtggctttaacacctcagtacttcagtccgctctgcgcacaggcagaaactgcccttgagaccagacaaagcacccaggtgtaacaggggctggcagaaagagttgtcagtatgcacaggcagagtgagtccctgggggacttggttggagGCCTCACTGTAAGACCCGGGGGTTGTCCTGCTGACCTGCAGAACTTTGATTTCAAGGCCATACTTGGAGTGGATGTTGGAA…
CUFF.12056.1	chr15:60081922-60409211	+	AGAGGGAAAGAGAAACAGAGAAGGGAGGGAGTAACATATGTGCTTAATATGTGTGCTTCTGAGCACACTGAGGGCCACCGGGCACTGTGTCGAAGCCGTCTCAAAGGCTAGGTTTgttgggatatttatcagccagttaccgtcatcattggtggttatctgtgcctgtggctttaacacctcagtacttcagtccgctctgcgcacaggcagaaactgcccttgagaccagacaaagcacccaggtgtaacaggggctggcagaaagagttgtcagtatgcacaggcagagtgagtccctgggggacttggttggagGCCTCACTGTAAGACCCGGGGGTTGTCCTGCTGACCTGCAGAACTTTGATTTCAAGGCCATACTTGGAGTGGATGTTGGAA…
CUFF.12054.1	chr15:60493445-60524638	+	GTGAGTGAGAAAAGCATCAGAAAGAGGGCACAGCTCAAAGGAAGCAACCACATTAGAAGCAGGAGAAGTGTTCGTGAGAGCAAAGTAGAAAGGACAGACTAATTGAAATGATATGAGAAGCGTTTCAAACTCTTCTCCAAAATAAGAATCAGCTTCACTGTATTTAAAAATCCCTGGAAGGAGTTTCCTCGTCATCTCTGTTTTCAGCTTATTGACTTCTAGGGATGTGAAAAATGTACTGGATAAGAgaaacagctggagtttttaaaatcaatcccactatgagtttgaatattctgcagagttgagagatgctgctcaaagcactcagccttcttgccaacctctactcacatgtaaaatgaagatgctgcctcatagtgtGGAGATGcttgctgc…
CUFF.12065.1	chr15:61204777-61394405	-	CGATTGGCATATGGGGGATGAAGAAAATTAATTTGATACAAGAGAACAACCAGACAACTTTCCCTCAATAATCCTTCTACTTCTGTGAAGGGAAGATTTGGAAGGTGGTGAGAAGTGATTTGCTGATATGATGAAATAATGAAAATATGGAGTTCCTTGGGCAGCTCCTATAAGATAAGGAATTTTGACATTTGTTTGGAGAGCCTCACTTGACCTCTTTTTGGGGAGCTGAATTGGACTGAACGTGAGAATTCCCTCTGGACTTGATCTCTCAGGAGACTAGAGGTCACTGCCTTTGATGCATTATTCAATAAAGGGAAAGAAATAAGGCTGAGATCAGGCATGGCCTTCTTCATCATTGCTTCACTGTAGaaaaaacttgttgacccttCTTCTTGA…
CUFF.12065.2	chr15:61204777-61394405	-	CGATTGGCATATGGGGGATGAAGAAAATTAATTTGATACAAGAGAACAACCAGACAACTTTCCCTCAATAATCCTTCTACTTCTGTGAAGGGAAGATTTGGAAGGTGGTGAGAAGTGATTTGCTGATATGATGAAATAATGAAAATATGGAGTTCCTTGGGCAGCTCCTATAAGATAAGGAATTTTGACATTTGTTTGGAGAGCCTCACTTGACCTCTTTTTGGGGAGCTGAATTGGACTGAACGTGAGAATTCCCTCTGGACTTGATCTCTCAGGAGACTAGAGGTCACTGCCTTTGATGCATTATTCAATAAAGGGAAAGAAATAAGGGTCTTTCACATGTAGATCGTGTGATGAGATGATAGTGAGACTGCTGTGTGGGGTGTCCAAGAGGTGTCC…
CUFF.12065.3	chr15:61286747-61394405	-	CGATTGGCATATGGGGGATGAAGAAAATTAATTTGATACAAGAGAACAACCAGACAACTTTCCCTCAATAATCCTTCTACTTCTGTGAAGGGAAGATTTGGAAGGTGGTGAGAAGTGATTTGCTGATATGATGAAATAATGAAAATATGGAGTTCCTTGGGCAGCTCCTATAAGATAAGGAATTTTGACATTTGTTTGGAGAGCCTCACTTGACCTCTTTTTGGGGAGCTGAATTGGACTGAACGTGAGAATTCCCTCTGGACTTGATCTCTCAGGAGACTAGAGGTCACTGCCTTTGATGCATTATTCAATAAAGGGAAAGAAATAAGagaaacaacagacaagactgtagaggacatgatgggacaacgaaagcagtttggagggatgtgaccatga…
CUFF.12077.1	chr15:62308011-62328417	-	GTTGCAGAGACTGAGGAAGCCTAAGTGaggtggagacaccaggatttgaacccaggagaatctgatgccagagcccatactgtttcttaacgactccgcaataTCCCGCCAAAGCGCTGAAAGAGGATGACAGAAGAAATCGCAGCAAAACCAAGTGAAGATTAAAACGGACGAGGGTTGGTGGCACACAGAGATGAGAAGGGCACTGAACAGGAAGAGACAAGGGGGATACTAATGCTAGATCACATGATAAGAATGAACCAGGAAGACCGAAAGAGACCTGCTGCTCCAACATCAAGCActttctgccattcgggtggtCTGGAAGCAAGTGTAAAAGCAGCGGTGATGTAGTTATACTGCTAAGAAGCACCAATCGACAACAATGGAATTAGAGGC…
CUFF.12078.1	chr15:62684231-62690107	-	TGAGCACGGTCAAGAAATTAAGAATCTGCTTTCGCTGAAGAATGAGCAAAAAATTTGGGTCTCTTATGGTAAAGCATACAGATCTCCACTGAACCCTGTTTTGGGTTTGACTTTTGACCAGGTGACTGCATTCGCCAGGGGTGGCATTACAGTTGTATATAAAACCTTCTTGGACCCTAATGCCCTTCTGCTACCTGGATGTGACAATTGGGACATTTGTGAGGGATTTCCAATTAACTTCAGTG
CUFF.12104.3	chr15:63803049-63806287	-	GTGGCTGTTCCATGTTGTATTCCCATTTGTTTTAAATCTGGGTATTTTTTGAAGGGTACCTGCATAAAAATAGCATCTTTGCATTCTTGTCAGATCCTGATGCATACTGGTTTTCTAAAGTCCTAATCCTGTTAGTGAGACATGTCAATTAGACTGTATCATGGGGGATTATGACAACTGAGAAGAAACAGCCAACTGGAGAATCTCAAACTGTATGAACATAGACCTACCAAGAAGAAAAGCCCTTGATTATTATTAATGAAAAACTGTTTGCAAGAAATAAAAACAAGGTAACAAATAGCTTATTCCTCTGTAATGCTTTGCTGTGATTTGAGGATTTTCCTAAAAAATCGGGTGCCTCTTGATGTGGACGCCAACTGGGTCTCCATTTCCTGAAAT…
CUFF.12135.2	chr15:65267106-65295765	+	gatggaggaaggggccaggagcccggaagttcagacagcctctagacagtttcccagagcctccagaaaaaaggctgccctttaacactttgattctcacctcatgcgaccgacttcaggcttctgatctacataatgagaaaacaagagaaaggatccttgaaggagggaagtagaagcaggtggtcaattaagaagctcctgcagccatcaagacaacagATGTTCATGCTGCCTCTGGCTGAGATGATTGGATGGTGTTTGCCATCAGTGCCTctaagactcctcactctcactgcagagggcccaggttcgatcccttgtcagggaaatagatcccacatacagccactgaagttctcacgtcctgcaacagaagatcctgtgtgcagcaactaa…
CUFF.12193.1	chr15:66702461-66706254	+	GGAGAAGATAGACGGgtgaagatactgaggttcagaaagatggaacaacttgcgcaagatcacacgAGCTCCTGTTAAACTGATGTCTTCCTGAACTTTGTGTGTTTGATTCGCCAGCATTTCACTGTGATTCTTCAAGAGGGAGGAAGAGAGGCAACCAGATCAGTTACATCGTGATTTAGCTAATCTTTGGCAGAATCACGAATCCAGTCCTCAAGATGAAAATTCTATTTCCAAGAGAACAAATCCTAAGTTTAAAATTGTTCACCGAAAAAGTAAAAGATGATTTAGATCACGCTTCAAACATTTATGGTATTACTATTTCTCAGCTCTACAGGAATAAGAAGAACTTAAGTGCTTCTTTGGAACCGGATTCCAAAGTCTGGTTCTGCTTTCCTC
CUFF.12193.2	chr15:66702469-66706254	+	TAGACGGgtgaagatactgaggttcagaaagatggaacaacttgcgcaagatcacacgCACAGAGCTCCTGTTAAACTGATGTCTTCCTGAACTTTGTGTGTTTGATTCGCCAGCATTTCACTGTGATTCTTCAAGAGGGAGGAAGAGAGGCAACCAGATCAGTTACATCGTGATTTAGCTAATCTTTGGCAGAATCACGAATCCAGTCCTCAAGATGAAAATTCTATTTCCAAGAGAACAAATCCTAAGTTTAAAATTGTTCACCGAAAAAGTAAAAGATGATTTAGATCACGCTTCAAACATTTATGGTATTACTATTTCTCAGCTCTACAGGAATAAGAAGAACTTAAGTGCTTCTTTGGAACCGGATTCCAAAGTCTGGTTCTGCTTTCCTC
CUFF.12206.1	chr15:67197061-67210512	-	AGCGGAGGAAGAGAAGTGGCCCAGAGCTAACAGGGGAAGAAGCATCCACCTGATCAGTCTCCTGGAAAGAAAGTATCTCTGATCCTTAGTGTCCAGTTCCTATGTCCTGGGCTGCTCTATCTGCGTAATGATCATCGAATCTGGCCCGGAGGCTGACAGAACAAGATGGAAGCCCTTCAAGAGAATTGCCAATAAAGAAACtgaaaatgggcaccgccttccggagGTTCCCATACAAGCTGGGAACAGCCGGGACTAACTCTTCTCCAACATTATCGCTAATTGGCAGCAGCAAGACAGCCTGTGAGCTCAAGAAAACAGCTGCCTGACAATCCTGGAGATTTTGTGTTACAGGCCCCACCACAGGAAGAAACTGATGCTATCAAACAGTGCTCCATT…
CUFF.12206.2	chr15:67197061-67210512	-	AGCGGAGGAAGAGAAGTGGCCCAGAGCTAACAGGGGAAGAAGCATCCACCTGATCAGTCTCCTGGAAAGAAAGTATCTCTGATCCTTAGTGTCCAGTTCCTATGTCCTGGGCTGCTCTATCTGCGTAATGATCATCGAATCTGGCCCGGAGGCTGACAGAACAAGATGGAAGCCCTTCAAGAGAATTGCCAATAAAGAAACtgaaaatgggcaccgccttccggagCTTTTCTTCATATCCCAAATCACAGGAAAACAGCTGCCTGACAATCCTGGAGATTTTGTGTTACAGGCCCCACCACAGGAAGAAACTGATGCTATCAAACAGTGCTCCATTCCAGATTCCCAGAGAAGAGAAGCTGATTGGTCCAGCTGGGGTCCACTGTACACACCTCAGCT…
CUFF.12206.3	chr15:67201865-67210512	-	AGCGGAGGAAGAGAAGTGGCCCAGAGCTAACAGGGGAAGAAGCATCCACCTGATCAGTCTCCTGGAAAGAAAGTATCTCTGATCCTTAGTGTCCAGTTCCTATGTCCTGGGCTGCTCTATCTGCGTAATGATCATCGAATCTGGCCCGGAGGCTGACAGAACAAGATGGAAGCCCTTCAAGAGAATTGCCAATAAAGAAACtgaaaatgggcaccgccttccggagGTTCCCATACAAGCTGGGAACAGCCGGGACTAACTCTTCTCCAACATTATCGCTAATTGGCAGCAGCAAGACAGCCTGTGAGCTCAAGTATGTGAAAGATGGGGGAAAACAAAAACAAAGCCAAACTCTTAAGACTCCAATCAGCTTTAATTAGTCAAGAAAAATCAACAGCC…
CUFF.12219.1	chr15:68380038-68405023	+	AGCTCTGAACAAATATTCCTGAAGAAAGGGAGCTGGAAGAGAGTTTTAATAGAAGGAAATTAGAATAACTtgaagaaagctgagcaccgaagagttgatgcttttgaactgtggggttggagaagactcttgagagtcccttggactgcaaggagacctaaccagtccattctaaaggagatcagtcctgggtattctttggaaggaatgatgctaaagctgaaattccggtactttggccacctcatgcaaagaattgactcattggaaaagactctgatgctgggagggattgggggcaggaggaaaaggggacaacagaggacgagatggctggatggcatcactgactcgagggacatgagtctgagtgaactccgggagttggtgatggacagg…
CUFF.12222.1	chr15:68698427-68834872	+	AGGGAGGGGAACGTGCTGTCCTGCAGTTTCACACACAAAACTTTGACGGAATTCCAGGCCAGCCTGGTAGCCAAGAAGGAGAAGCAGCAGCTCAGGGCCCAGAAGGAGGATCAGCAGGCCCAGAACTTCCAGAACAAGTAGGAACAGTAAGAGGCCCTCTAGAAGAAGGGTCTGGGATATAAAGAAGGCCAGTGAGAATGTGATGCCCCCTGGGGGGAACCCTGGAAGCAGAGGGAGCCAGCCAGCAGGAGGAGAGGGGTGAAGTCTGGTCTTGCCATCAGATGCTGAGCAAGAAACCTGACACCTGCAGCAGTCTGCCAGGCCTGGCCACCAGGCTGAAAAGGCCAGTAAGGGAGTGAAGCCAAGCCAGGCTGGGACCTGCATGGTGACCGAAGGCTT…
CUFF.12244.1	chr15:72740873-72744846	-	TTGGAGGCAAAAATGTATATTTTCCAAGATCTACATTTCCATACATGGAAGAGATTTTTCTACCTCATGCTCTGGGAGAGAAAATTATTAGAATATTTATGGCTTTTCTTATtccctctagctccccagttcttctccaaaggaagacaaatgacctatctaattggtatatttaagagcgagaacagaacaagcttggtttaacctcctcTGGCTTTTTCATCTAGATCTGCAGATGTTTGGAGGTGTTCGTCTTGAAAACAAACTGGAGTATATATGCTCTTTGAGAAGGCCTGAGGCTTCCTTCTCTGCTCAGAACTTGGTAGGTTGGGCTCAACAATCCAGGGGCGAACTTTCAAAAGCCTCTTGTGACCACAGAGCTAAGCGCATCTCCATTCA…
CUFF.12263.1	chr15:74114012-74128356	-	CTGAGCCCCGAGGCCCGGTGGGGCAGCTGCTACAGAAGGAAGCGTTAGTGTGGGGCAAGAGGAATGACTGTTAAGggcccctttcctggtctctctccttaggtccataatcactcatgtctccaggctaagctggaatgtcacgttctccacgaggcctttcttgatccccTCAACGAAGTGAGCCTGTCCCTGCTTGGAAATCGGCAGCACTTGGTGTGTGCTCCTCTTTCATGAGTCACCGCATCCACCCCACACTCATGCAGTCCTGACCGCCACA
CUFF.12280.1	chr15:74475517-74478116	-	CGGGAGAGATGGAAGGTGCAAAGAATATGGCAAGTGATGGGAGGAGCACGTTCTCAGCTGTGGACGGACTTTGAATTGGAAGAAGAGCTCACGTGAAGGAGTGACCCTGGTGGACAGTCTGGGGATGGAAGACCTCATGAAACCGAAGCGCAAGTTCAGATGGAGTGGATGGGAGATGAAGGCCGTGAAAGGCCAGGACGTCATATAAGAGAGGGGCGTGCAGAGCGTGAGACTCGGGGCAGAGCAGTTGTGAAGGGTTATGAGTGAGGTTCACACCCAGCCTTGCTGACTCAAGTGCAGCGTGAATGAAGCATCAACTTGAGCTGAGGTGGTGCAAGCTGAGAAGTCCTCAGCCTGGTTGTGGAAATCAGTGAAGtgagtgccgggtagatatggcag…
CUFF.12288.1	chr15:74489680-74491814	-	GAGGGTGTGTGAGGAAGAAGGCAAGTGATGagaaaacaagctgtgggaaatggtcacccagtgttaaagatcagaacggggttttcagaacggagacttaacattataaaagtggactttctaccaaggacaagagtCCCTCTACACAGGGTCATGACAATGGTGGTTGGCGGGAAAAATCTCCCACCCAATCCAAGCCACTTAAACTGAATTTTTGTGAGAAAGAGGGAGGGGAAAGTATCCATCTGCAGTAAAAACTGGATATTGTGGGAAATGAGAGTGGAATCAGTGGAAAAATAGAAACAAAGATGTTCTCAGTTAAGTAACAACGTTTGTGTGGTCTCTGATTTGGGCTGGAGATTTTGACTTtctcctctcctctcttcaacaccctgcctg…
CUFF.12307.1	chr15:75018676-75024256	+	CCGGCGGTGGGCTGCCACTGTGCTTTCTCTGACAGGTCTACTTTTTGTTTGCCTTGGAATATGATTCTTCATCTTTGGGGGACTCTGATGAAAGCCTGGTCCTGACCATTCCTTTAACTCCAAACGTGCCTGCAGATAAAATTTGGGATGGGATGCGCAGTTCCCTGAGGCCCACCCACAGCCCCACTCATTAAGgcacagacttgaaggagaagcagaagtctgccaaatgggcgggtctgtgaaacgctttctgagtggagggaacagcatgtgcgagggcctagaggaatgagagaTGGTGGTGAGTGGGCCGGGAGAGTTACAGGAGGCTCAGCTTTCAGCTTGCCTTCTGTTGCTGACCCTCAGGGAAGGCAGACCAGGAGCTCCAGATGTGTG…
CUFF.12322.2	chr15:76377249-76380178	-	GAGAGGCCATGAAGGAGTTggGAAAGATTTCCAAGATCCTGTGGGGTATCCAAGATTGGCTAGAATGAGAAAATTCCAAGGAGACCAAAGAGgtccttggtcgggttgcgtgatgtctcagggcatcatttgccccatctgtaaaatgggtaacaaGCTTACAGGGTCTATACCATCACCCGTGCAGAGCTGCCTGGAAGACTCAGTGTTCCACGAACTTCATGCCGTGGTTCTCCTCCAGCCCCTCCATCATCTTGCTTAGCATGGCTTGGAGTTCACTCCTTTCCCACCTCTCCTTTTTCTCCCCTCCTCACCCCCAAGGCTCTGCTCCTGGAATAGATCTTGACAACTG
CUFF.12322.1	chr15:76377249-76380179	-	TGAGAGGCCATGAAGGAGTTgggtccttggtcgggttgcgtgatgtctcagggcatcatttgccccatctgtaaaatgggtaacaaGCTTACAGGGTCTATACCATCACCCGTGCAGAGCTGCCTGGAAGACTCAGTGTTCCACGAACTTCATGCCGTGGTTCTCCTCCAGCCCCTCCATCATCTTGCTTAGCATGGCTTGGAGTTCACTCCTTTCCCACCTCTCCTTTTTCTCCCCTCCTCACCCCCAAGGCTCTGCTCCTGGAATAGATCTTGACAACTG
CUFF.12324.1	chr15:76650302-76651757	+	GAGGAGGGGGATAGCTTGCCAGAGGACCTCTCTGAGTGTGGATTCAAAAGAAGCTGACAATGACCCTTGGGCTTTTCCAGTGGTTACCACAACACCATTTCCTGCCGCCTGGAGGGAAGACAGAGTAATTGTTGGCAGCAAGAGAGTGGAACCTGGAGACGATGTGGGCATGCTGATTTTCAAAGGAAAAGATCTGAGCCTCCGCCTTAAGAGGCAGACTCACCCTCTCCAACCTAGCGAGGGTGAATGTTGCCCCCCAGCTCCTCAGACACCCGCTTGGTACTAGGCTTGTTCTCCAGGCTTACTAGAAGAGTACCCCTTACTCTAACCCAACATCCTCAATGATTATCACCCCTGCCTCCTACCTCCCATGTCCACCCCTATGGCAGGGCCCCCACA…
CUFF.12324.2	chr15:76650302-76651757	+	GAGGAGGGGGATAGCTTGCCAGAGGACCTCTCTGAGTGTGGATTCAAAAGAAGCTGACAATGACCCTTGGGCTTTTCCAGTGGTTACCACAACACCATTTCCTGCCGCCTGGAGGGAAGACAGAGTAATTGTTGGCAGCAAGAGGCCAGAGTGGAACCTGGAGACGATGTGGGCATGCTGATTTTCAAAGGAAAAGATCTGAGCCTCCGCCTTAAGAGGCAGACTCACCCTCTCCAACCTAGCGAGGGTGAATGTTGCCCCCCAGCTCCTCAGACACCCGCTTGGTACTAGGCTTGTTCTCCAGGCTTACTAGAAGAGTACCCCTTACTCTAACCCAACATCCTCAATGATTATCACCCCTGCCTCCTACCTCCCATGTCCACCCCTATGGCAGGGCCC…
CUFF.12439.1	chr15:82276823-82277696	-	ACAGTGAGGGCGAGCTTTGGATTCGGGCCTCCGGGACCCCCACGCTCCATTCCCAGAAACCTTCGCGCCGAGAGGTCTCTCTTCAAAGGAGTTGGGCCCGGGGCGCCCGGAGCTTGCGGAGCGCCCCGTTTTGCAGGGCCTTCCCTGAAGCCCTGCGTTCCCCGCTCCGCCAACCCCGATTCCTTTGGTTCTGGACAGGGAAGGAGACCTCGGGACGTTGTGCAGCTTTGCTAAGCCTCCCCGCGCCAGGCTGGAGTGTGGGAGGAAGCAAGGCAGTCTGGATCGAGGACCCAAGCACCGAGACGACCGCAGGAGCATCTCCTCCCGCAGAGCTATTCCAGTTTGACGTGAACCGTTTGGAGCCCCAGTGCCACCTGACGGAAACCTGCATGCCGGGAA…
CUFF.12566.1	chr16:2215939-2221672	+	AGGCGGAGGAGGCGTCTGCCTGGGCAGCCTCCACACCTAAGTAAGGCAATGCAACCAGTGCTCTCCAAATCAGACCTAATTAGACCCGCAAATCAGTGCACTCGAGTCATCACCGCACTCTCCGAGCACAAGTGGAAACGCTGTTTGGATTATCCGACAAGGAGCATGTTGTGTCTGTTGGTGTTTCCTTGGATTATCCACTCTGCTTCCCGCCTTCCGTCTACTCCCTAATGGAGAGGCAGGATGCAGCCCCCACAGGCCGGCATTCATCTTCCCCGCCTGACCCTCTCACAGGCTATTTAGCCGTTGTTGCAAGACCAAGGAGGGGAGAAAAATGAAAGCAGGGCCCAGAGAGCAGTGAGGGCAAGTGGGACTCTTAGAACCGGATCCACTGGTAAG…
CUFF.12621.1	chr16:3757320-3762574	-	CAGCAAGCAggtggactcagagagaagagagggactaagcctgcctggGTGTTATCATGGCCTTTTAGATCCTAATGTGTCTTTGGATCTCCAACTCGGGCTCTTGACTTCATGGATACAAGGCACCCCCCCAATCCCCCCAGTGTCTAAAGAGGCCAAGTGCGTCCATTTCCAGTTGACATTTTGGCCAGGGGCATTTTCTGGCCCTTTCCCCTAAGTTAAGGGGTACTCTCTTCTGAGGTCTCAGACCCCTGTGCGGCCAGCGCTGACAGCAATGGAGCGGACAGTGGGGTCAGCCTGTCCCCGCTCTGGAGGAACGCTCACAGTTCTCATCCGGCTCACTCATCTAAAGCCTAGAACCATGTGGACTGAGTTCATCTTCATCTAGAAACTGTGGTT…
CUFF.12680.1	chr16:11583759-11663767	-	AGAGTGCTTTGGTTCAGGAACTGTCTTTTTGGTGTGTGTACAATAAGCTTTTACTTATTACTGCTTCAGCCATTCATTGATTTTATTTCAGACATGTATGCActtttgacatcctctagcttagcgattcttacttcagctgtgtccagtctgctaatgaacccataagagtcattcttcatttcagctgtagtgtcttttatctcttgatttccttttttggcccttaagattcccaactttcagcttataatgcccttctgttcttgaatgtcatctgtttacttgttagaccccttagcagagtaagcatagttgtttccaattctcagtctactaattccaatatccctgccttgtctaattctggtatttcttctgcctcttcaagctgcaatt…
CUFF.12698.1	chr16:13785243-13945658	+	GTTGAGTGGGGTCCTGAGCTTCGGGTGTCTGAAAAGGAACTGGGCAGAGTGGGGAAGGGATGTTTTCTGGTCAACTTGACAAATCCCATACCAGATGTTTTATCTGCATTTTTGCAAACTGTACATTTCCAAGTAAAAGATGAGACTTCCACTTCTCCAGaaCTGAGATTCTCAGCATCAACCTCCCTGACATTTTGGGCCAGATATTCGAAGTTGGGATTTTCTCTGCTgctgctgctgctaagtcgcttcagtcgtgtccgactctgtgcgaccccatagaccgcagcccaccaggctcctccctccctgggattctccaggctttaaaatttctttcTCAGAACCTGTGCTCAGCCGAATCTCCTAGGGTCTGGCTCCTGCCTCTGGCTTACCTGT…
CUFF.12717.2	chr16:18621398-18624490	-	CTCGCTGCAGGGAGGACCGCTAACCAGGTCAAGTTATCTACTCTTCAAATCAGAGGATACGTTTGAAGAAAAGGGCAGTAGCTCTACATGCAGAGACTTTTCTGGAGCAGACAGTCGTGGCATTGCCAGAGAAAGCCATCTGCATTTCCTCAAATGAACAGAATCCTTCAGTGGTGCCTTGTTTAGTGATTTGGCATAGTGGTGTTCACAAACTTGGGATGAGCAGGGGGAAAAAAAAAAAAAAAGACATCTAGAAAGATTTGTAAATGGAAAGATCACCTTGGAAGCCCTATCTGTAACCTAAAAGGAAGAAAACAAAAACAAATACTCCTTGTTACTAAGAGGAGGGACATACTGTCCTGTTTAAGTTTTTTCCCTAAGAATCTGAAAGACCTATAA…
CUFF.12758.1	chr16:20506707-20514912	-	ctggagtgggctgccatttccttctccaggcagtcttcctgacccagggatcaagctcgtgtttcctggtctcctaaattgcagTCCTTCAGGTTGACAGGACCGCAGCCCAGGCCACAGTCTATGTGATGCCCCTGTATCCTTGTCACACTCGGCACTGGTGCCACCTTTACACACTAAACggaaggactgatgctgaggctgaagctgcagtaccttggccacctgatgagaagaactgactcattggaaaagactctgatgctgggaaagattggaaggcgggaggagaaggggatgacagaggatgagatggttggatggcatcaccgactcgatggacatgagtttgggtaaactccaggagttggtgatggacaggcatgctgcagtccatgg…
CUFF.12754.1	chr16:20524634-20591285	-	TGGGGAGCTGTTTTGGAATTCAAGAGGTTTACACAGCACTGCTGACCGCAAGTGGACCCTGCCTGGCTCTTTCTTCCAGAGAGacattggagatatggcaatgaacaagcagacacaaactacttttttggggtttTTAGCCTCTCTTGGAAGATTAACATACTCAATTAAAGATGGTGCATGCCATGAAAGTGGAATAAAAGAGATTGACTTTGTTATGGCCATAGTTTTACAAAATTTTCATGTGTTATAAAAATAGAAAAGAGAATCATCTTATGGTGCTGAGACCAAACTGAAGTTCAATCATCTTGTGACCTTTCCTCATCACTCACAATCCAACAGCTTGAGGACTTGTACATCCACTAAGCCTTATGCCACATCTTTTTAACAAAGAATGTG…
CUFF.12754.2	chr16:20590119-20591334	-	GAGGGGGCATCAGTTGCAGAGCTTCTAGAAAGAGAGGTGAGGGCCCTTGCTGCTCAGCGTCCGCCGTTCATCCACCAGCCCCTCCTGGCACCATCTCCGAGGTGCTAATCCCTGCTTCCTTGGCTTCTCGGCTTATCTGGATGGCCTCCTGTCACTGTGTTTGCCCACCATGTTTCTCACCTTTCCGAGGTGGCCGGCTCTCTAGAGAAACAAGCTGATAACACCGCATCCGATTTAGAGGCGCACAATTACCTAAATCACTAAGGTACACGAGCTGGCCACAGGATTCAGACTTGTCTTTTCCTGATTGAATGTCTTTTGAGTGGCCATAGCCCAGCGTTGCATGTGACATGTTTTACTCTGGACAATTTCAAAATATTTGGGTAAAACTGAGACCCT…
CUFF.12918.2	chr16:32368779-32369991	+	GAGGACCGGGAGGCAGGGTCACAGGATGCTATGAACCTGGGAAGAAAAGTTCCACGTGCAGCAGAAGCCCACCACCTGGGCCTTCATCAGTCATCCCACTTGGGAGCGGGATGTGGGGAGTGAAGGACAGACAGCCCATCTACGTCCAGCAGGAAGAGGCCCCTGAGGGTTATAAACGAATGGACCAGTGCTGAATGAGGCCACTGGATGACAGGCACAGCCCGTGGGAGAAGTGAAAGTATGTCTGAAGAGTTTTTGTTCTAATTATTAAGTGTCTGGCGCTCTACTATCTTACGCCCGGTGAGCATTAGCAGATTCTGACATCCTTCTGCATACAGTGTCTCCTTTCACTGTCAGAACCAGCCCGAGGGACCTCGGCCGCACATTCGCTTCTACACA…
CUFF.12918.1	chr16:32368779-32378284	+	GAGGACCGGGAGGCAGGGTCACAGGATGCTATGAACCTGGGAAGAAAAGTTCCACGTGCAGCAGAAGCCCACCACCTGGGCCTTCATCAGTCATCCCACTTGGGAGCGGGATGTGGGGAGTGAAGGACAGACAGCCCATCTACGTCCAGCAGGAAGAGGCCCCTGAGGGTTATAAACGAATGGACCAGTGCTGAATGAGGCCACTGGATGACAGGCACAGCCCGTGGGAGAAGTGAAAGTATGTCTGAAGAGTTTTTGTTCTAATTATTAAGTGTCTGGCGCTCTACTATCTTACGCCCGATGAGCCTCTCCTGGATTGGAATTATGCTTTTATCTGGATATGACAAACACTTTGGAACAGTTTGGGATCTCTTGTATGAACCCCATCTGAGTCAACAC…
CUFF.12923.1	chr16:32378340-32381024	+	GAAAAGAAAAAAAAAAAAGGAAAAAGTCAGAATGAAGAACCTCCATGCCAAGTTGTTCTCCTACACCATGGCAGCCTGCGAGAAGTTCAATGGTGTGGCATTTTAAGAGGCCAATCTGACTTGGCAAGAGAGCTCTTGGTTTTATTCAACCCTTTGCTATCTCACAAAGTTGTTACATATAAAGCAGGTTTAGGCAGGATGCAAACTGAAGGCCATTACCCCTAGGAAAGATTTCACTGATCAAGATTTGAAATTCCTGTAGATGTTTCTACTTAGTCTCATTCCAGGAAAGGCACAAGGGCCCCCTTGCTGGCCTGTTAAGGAACTCAGCTCAGTGAAGTAACCTGTGGGGAAGATAAGGCCAGGGCAAAAGCTAAGGACACTGATTACTAATCAAGT…
CUFF.12923.2	chr16:32379293-32381024	+	GGGCTGCATGTGTACAAAGGAGCATTGACAAATTCAATTGTTCTTTTTCCTTGGGGAGCAGTTGGGGCTGAGGAGTCAGTTAGCCAGGACTGCCTCGCCTGGAAATAAATTCATGAAGTTATGCTGCATTTGAGGTCAAAAAGAACAATACTCTGGAAAATCCTGGGCACCTCTATCAATGGCCTGGCTAGAGAGGCCTGGGAGAAGGTCCTGACTGGAAGGTGTCAAGGTTGAGCAGACAGGCCTGGTCCTTTCTTGGTATGGAGGCTTTTGTTCAAAAGGACTGGAACTTCTTGCATTAAACAGCACTCCGGACAGCAGAAAAGTTGTGTAACCCCACCCCCCCCCACATCCTTCCTTGTTCTGGACCAAAACTACTTCCGTCTCTGAGCATCTACA…
CUFF.12928.2	chr16:32555012-32558895	+	GCAGGTCCTTTTAACAGGATACAGGAAAGAAGCCCCCAAAAGGAAGAGGACAGGAGGCGAGGCAGGGGTTTTCAGCTTGACTGTCAACTTCGTGTGGTGGTTCCTTTGTTTGGGGGCACTCTGCAGACAGAGTCCAGACACACTGTGCCTCAGGCGGGGAGCGGCACGGAGCAGGGGCGTGACACACACGTGGGGCTCTGCAGACAGCCAGGGACAGGAGGAGACGTATGAGGAGGAAGAAGCAATAGCAAGCGGGGAGCTGAAGCAGGCGGTAGACGAGAGGAAGGGGCAGCCTGAAGGTGGACGCACAAGACCATCTCCAACCACTTCGTGAATTTCTCTACAAACCTCCCCTCTCCACTCAAGAAATCCCTTCGCCATGTTTCTCCAAGAGTCCCA…
CUFF.12982.1	chr16:38148790-38152943	-	ttggaggcatttgaagttattaggttaaagccaatgatgcctgtctagggcaatagcaatgaggatgagtttgtgagataactggtggtagaagcaactgactatgattattaactgactaagagagagagagaagactcaaataagttgccatggttctgacctgggatctggtggatggttaccatctctgttttattatttactgagatgggtacacaaaagaatgagaagttttggaggtgatgatcacgagttcagttttgtacctgttaaggtttaggtgtctgtggttcaaccacagtccgttggttctatctgccccaaaggggctaccttggggcagaagaaatggatctggaggtcctcacattataggaggtaaccatatcttaggaa…
CUFF.13038.1	chr16:40065851-40106647	+	gtgggtgagcaaggcagtaaagccaaatcagtgtgatgtgagaaatgcttggctggttttgaagatggaaggaactcagaaagcctctagaagctggaaaagACACCATGCTCTTGGTAAGGACCCGCGGAGGAAAGAGATACAAACCCTGTTGTTACAAGCCTCACTAACAAATTGCCACACCTGGATGAATTCTGGAACCTGCGTCCTGCCTCCCGCTCCCGCATGTACTTAAAGACTGAAGAATGTACAGAAGACGGCCAGGTGTTTGGTTCAGCTCTGAGACCTCAAAGTATTGACTTCTCACAATGAATTGTTCTTTGAAAGCATGGATACAGGACTAATTCTTAGATCTGCAAATATTTTTTGAAGACAAGTGACGATGCTAGCTGGAGGAGG…
CUFF.13038.2	chr16:40065852-40106647	+	tgggtgagcaaggcagtaaagccaaatcagtgtgatgtgagaaatgcttggctggttttgaagatggaaggaactcagaaagcctctagaagctggaaaagGGAGAAGAAGCAGATAATACAAGAGCCCTCAGCCAACAAGACTAGACTTAATTGTCCCTCAATTCTCTAACCAATTGCCCTAAAAGAGACTTCTCTGATTTTCTTCTTCTGTTTGGATCAAGACATCTGGATAGGACAGAAGAATCTTTGAAGAGCCCACCTCAATTGCATGAAAGACTTGGCAATGGGAAACTTTTCCCTTCTATGGCCATGTTTAATCCCTTTGGATTGTGAGAGAAATGGTGTCAGTGGATGGAGGGCCACCACCAACACTACAGCCAGATCCTTCTCCAGTGAG…
CUFF.13362.1	chr16:58877325-58878385	+	CAAGCAGGTAGCTGTTAATCCATAAACCGGCGCGTGGTGAAGAGATGTTTCTATTTGAAGGCAAAGATTTACTCTCTCAGgatagactccctagatatggactcactagattgaagAAAGGAAAGTGACACCACTTGGACTAAGAAAACAATTCATTGGAATCCCACAACAGATTTCCAGTAGCTAGAACAGTGTCAAATGGCCACTCCCAACTAGAAGTCAGGAAGAGAAAAAGTCTGCTGAGCCAACAAATGGAGTCCATTCCTATGGTTTTACAATTTTTGTACACACCTTTTAttcttttccagggaac
CUFF.13375.1	chr16:59780919-59782991	-	cttgaaggagagacttaatttgggagaagtgaaaGGGGGTATTACtatgacttaatatagtgggcagtaaacacatagaatgtattatcctcggaggtgatgctgtcagaaaatacaaattggttggagaataatttagGCAAGATGAAAACAGTCTCGCAACTCTGGGGCTTAATTCCCTTACTTCCCGTCTCCTCACTGATC
CUFF.13381.2	chr16:59836935-59840212	+	GGGAGCAGCTGATAGAGCAAGGAGGGCTCTTGCAGGACTCAAGGTTGTTTACTGAGCAAGACCAGAGGGCAAAGAACATACCTGCGTCATCAACTCCTTCTGATCCCCTTTCCCAAGACACAGGCTGGCCACTGGGGAGCCTGGCACAAAAACATCCTCTGAGACGGTGCTCCAAAATCCCTCCCCAGCTCATAAACAAGAAGTAATCTGGAGGGACTGGAGACATCTGTGTGGGTACTTTCTGCTGAGTGGGATGCTTAGTGTTGAGGGTTCCTGATTAGTGTTTTGTTTTCTCCACTGTGCAGATTATTTTTGGTGATTCAACTCTTTCTCTTAAATAATAAGACCTTGTATGTACATTTTACAATGGCATACTTTTCCAAAGGGCTAAAGGTATTT…
CUFF.13400.1	chr16:60170706-60550020	-	TGTTGATGAGTGAGCTTGGAAGCTGACTGCTCGTAGCACCAGTGAGGCAGCCATGAGCCCTTTGAATTCATTGTTCTCATCCTTACTGAGGGACCTGGAAGCCCTGTAGCAGTCCCGGAGTGATGGGACTCCCTGCCTGGCCTGAGATACCCAGTTAGCACCTGCGAATCAGAATTTCCTCTTCGCAGCAATAAAGCATCCAGCCTTTGCATCTGTGACAGCCTCCCCTGTAATTTATGCATTCTATGCTATCACAACTTTGTAGAGTGGTTCCTCGACTCCATTTAAAGACTAACTTCAGCTTTAAAATGGGCAGTTCCTGAATCCAAGCTCC
CUFF.13398.1	chr16:60691135-60692157	+	cagactcaggataaaaacacaagtctagtgatgcccagacactactctttccaatagctcacattCCATGAGGAAGGGGAAAAGGCACATTTCTTTAGTGCTGTGCACCCTGCATGGAAGttctgaaggccgggaagtccaagatcaaggtgccaatagtatctggtaagaacccagttcctggttcacagacattgccttctggctatgtctccacatggcagagggatgggaaatcactctgggatcttccatagaagagcagcaatcccattgaagagggttctacttcaagatcccatcacccactagggccccatctctgaataccatcagtttgagggtaaggatttcaacctatgaatattgaacagaaacaaatattcaatgcatagcaTA…
CUFF.13414.1	chr16:60868293-60883064	-	GCAAAGAGACGCAAACTCTGGATTCCCGCGGGAGCTACAGAGGCTGGACCACTGACTGCTGGCTGACTCTTCAGATGTGGATGTGAGTGAGAAAGAAGGAGACACAGAGGTAACCTAGACCTCTGGAATGAAATACAATCCAGGATACACAAGAAGAGTCAGCAGCATTTTTAGCTGGAACACCGAGCAAACATTTTAGgcttgcatgatattaattctcctaccagggatcaatctagaccttctgcagtagaagcacagagtcctaaccatttgaactgccagagaattcACCAGActaccaaagtaatgctcaaaatcctctaagccaggctt
CUFF.13489.1	chr16:62857128-62857679	-	AAGGGCAGGAATAAAAGTGAGGAATGGACAGGAGGCGGGGTTTGAATGGGCAGAATCTGGCACCAGGGAGGAGATACAGAGAAATACAAGTGGCAGATATGTCCACTGATACACGATACATTCATGGACTAGTAAATGTTTCTGGCTGTAAGATGATTTCGTTTGCTTAACAAAAGCACCTGGAATGTATCACGAGGAGAGCCAG
CUFF.13523.1	chr16:64084488-64093603	-	GTGGACTTCAGGTCCCAGAGAAAGTTCCCGGGTTTAGCAACCACGCCCTTCCCCGCGTGAGTCAGTGGTCTGATCTGAAGACAGGTATCAGCTGCCACTGCTTTGCCTGAATGCAGGGTCCCTTCCAAGTTGTTCCCACCTGAGCGGTGGAAGAGAAGGCGGGGTGGGGCAGAGGAGGAAAACAAAAGAGTGACCAGAGGCTGGAAATCCTGGATTCCAGAACTATTAAAAAAATGGACATGCATCAAGCAAACAAAGAATAATTACAAAGAAAAGTACTAATTAATGGGCTTCCCATTCAAGATAGCGGAGTAGAAGGACATGTGCTCATCTCCTCCTGCGAGAGCACCAAAATCACAACTAGTTGTTGAACAGCCATTGACAGGAGATGCTGGAACC…
CUFF.13549.1	chr16:64595312-64596611	-	cccttcacctttttgcggtgtaacctgtccttctgtggagtgcactgaaactagtcttcagcaagtaccgcactcctattcaagctttctactcccgtcccactctgctttttaccactcctcttaccctgagagcactttctcaatcacttttacgaatcttcatttcagcccccgctactcaggaacctgatgcgaagagctgactcatttgaaaagaccctgatgctgggaaagattgaggacaggagaagaagagaactgcggaggatgagatggctggatggcatcactgactcaatggacatggatttgggtggactccaggagttggtgatgcacagggaggcctggtgtgtgcggttcatggggtcgcaaagagtcggacacgactgagca…
CUFF.13606.1	chr16:66674671-66676628	-	aatgagacagaagaacatggaggagaaattcaagatCATCGTGTGTGCAAATAGAGGGCTTCTGCGGAGTCGCAGCATCAGTATCACACTCCGTTGTCATAGTTACACCCTGAAAAGGAAGATGCCCTGACAAAGACCAGATTGGCTGTGccctcttcctatgcggatattcaggccatgtggagagatgatgtacagatgtcctgacacacagccaaagtgaagttgcaattcacaaccagcatcaatttccagatacgtgaggaagactttacgatgactccagccccaaccattgtccagctgcaactgcaggagagaccctagtgaggaccagacagccagacagctgcccccacatccTCGCTGTTg
CUFF.13616.1	chr16:66804320-66805567	+	gatcagtcagaggaaggagatgtaaaaatggagagggtcagagaggagaggaaatgctaccctgtagctttgaatacggagaagagtctaggaatgctgacaatctctagaagctgaaggagagaaagaagtaaagacaagaaagcagattctccccagagcctccagagtggaacgtagccttatcaacatcctgactctagcaaggaaatatccagaatcaacaaattcctgaagacagaaagcagatcgacggttgccaggcaatggaaggagaggagatggggtgactttttaatagacagaagatttcctttggatcaaagaaaatattcagagactgaaatagtgAAAGACAAAGGGAACTAAATTAACATTTAAATCAAAGTGGAATAAGCT…
CUFF.13616.2	chr16:66804320-66827062	+	gatcagtcagaggaaggagatgtaaaaatggagagggtcagagaggagaggaaatgctaccctgtagctttgaatacggagaagagtctaggaatgctgacaatctctagaagctgaaggagagaaagaagtaaagacaagaaagcagattctccccagagcctccagagtggaacgtagccttatcaacatcctgactctagcaaggaaatatccagaatcaacaaattcctgaagacagaaagcagatcgacggttgccaggcaatggaaggagaggagatggggtgactttttaatagacagaagatttcctttggatcaaagaaaatattcagagactgaaatagtggtgagggttacacaaccttgtgaacaaactgaatgtctttaatgGTGG…
CUFF.13609.1	chr16:67171858-67173121	+	GTGAGTGCGCTGCTGGGAGAGGAGTGGGAGGTGGCCACCTTCTCTCTGTGCCTCTGGACTTCATTTCTGTGTCGGTGAAAAAGAGGAAAGCTGTGGAGCTCAGATGCCAATGCCCTGGGGTGGGTCCCAGGAGGCGTCCACACCTTCTGTCAGCTGGGTACACAGTCTCCACCCTCCTCGCCTGGGGCAGCTGAAGGGGCTGATACGACCTTTGTCCCTCCAAGAGGAAGAGCAGGCACCGGAGCACAAAGCTGCCCCTGCATCCTTCTTCACCAGGATGAGCTACCGCCCTCTCTGGGCTTCTGTCGAGTGCCCCCTTTCATCAAATGTTTGTCATTATTTGTGAGATTGGTGTGCACCTTCTTCTAGAGTATGAgagaagggaatggcaacccactc…
CUFF.13636.1	chr16:67977940-68039999	+	atggaggaggagttagaaaaagggaaagtcaaaggaagacgtgtcaagggaagaacggtcagagaaatgcagtgttgctggctttgataatggaagaaagatgcctctgaaaactggggaaaccaagaaatggattcttccgtggagtccccagaaaggaatgcacacttgttgataccttgattttagaactcctgacttctagaactCTAGGTCAGTGGGTCGTCACTCATTCAGGGACGCTCCTTTCAGGCACAACCTTAAGCCAAGTTTCCTCACAGACAATTAAACCTATTTATGTCCAGTCTGCACTCTCCTCagtggttaagggacttctccaaggtctcattctagtaaattgcagagctgaacaaattaaacccatgactgctgtctcta…
CUFF.13701.1	chr16:70501865-70511810	+	GGAGGCGGAGCCCACGTGCTTTAGCTGAGGCTGGGAGGCGTTAGGAACGGCTGTTTCCTCCAAAGGCAGCGAATGGGACGGCGGATTAGGAGGGTGTGGTCTATCGGCTACAGCCAGCGGGAGAGAGCTGCCAGATTTAACAGGTTTGGAGTAGAGTGCAGAAATCCATTTCATGAAGCACCCTGTGGTAGTAGATAAGGAGCCCATATTATACAGGAGGTGCACACTtggcatcaccaacttgatggacatgagtttgagcaggctctgggagatggtggaca
CUFF.13716.1	chr16:71216865-71217542	+	GGAGGCGGCAGAGAGAGAGGGGAGCACCAGCGGGAGCGGGCGGGGGGAAAGAGCAGGCACTGGGGCTACGTGGGCGAGGCTGTGACTGAGACCAGAACCTGAGAGTCGAATTTCTCCAGATTTCATTCATTCCACATCAACATGAGAAACCGAGAGGGCTGGAGAGGTGAAGGGCCTGCAGAGTTGGGACGCATGACGTGCTCTGGACCACCCGTCATCTTTTTCTCTTTTTCGCCTGCCTCCCAGATGGTTAAGCATCCAGCCCAGCGACAGTGgcctggacttttcctgccaagccggattagcagactcccccatccgatcacattcctgtatctacccagattgctcatttcccacctttgcccgggtataatatctaatttctctgacttcagc…
CUFF.13752.1	chr16:71699336-71700599	-	GGGAGGAATAACTGGCACTTAGGGAAGCAAAATTTTGTGTTGCCTATTTTTTTAAATCTCCAGAAATGGACATGGACAAAGCAATGTGACGATATGCTTTGATCTAAATTGAAAATACTTTTAAAAAGAGCCATGTCGTATGACCAGGTATTGATAAAGTAGAATAGAAATCTGTAGAGTTGTGGACTGTTAGATTGCTAAGCATTTCATGACAGTGTAAAAATCTGTGCTTTCCAGCTCTGCTCTGTGACCCTGAAGATGTGCCTCCAAGGTCAACCCCCCCCCCCAAAGAAAGCAAGAGATGTCAGGTTGGGAGGGGTCACCAGGCACTGCCCCTGCCTCCCCCAGAATATCTGTTTCAGttgcaggtgcaaaaaccgaggcctgagaagcagtgtc…
CUFF.13752.2	chr16:71699336-71701850	-	GGTTGGGGGGTGTTGAAATTGCATTTGCAATAGTCTCCTTTACATCTAAGTGATAATTCTCTTTCCTTCACACCAACATTTAATGGACTTGATATTGACGATTATGGCTTAACTAACAAAACCTGTAGAGAGGAACAGCACTCCTCCCTTCACGCACACACACAACTCTGATCTCCCTTTAAATTATTTTCCATTTAGCGTAAATCCTATAGCCTGCCACAAAACTTTATTGAATAGCTCATTTGAGCAGAGAATACTTTTGAAAGAATATTAGTAAACTCTTTCAATGGAGTCAAAACACCAAAATGGAAAATTCAAGTTTTGAAGAGAGCCATTAAGTGTGATTAAACCTTTAAAAAGCAGAGAACAACGCCCGTAGAACTCTATTTAGCCATTTCA…
CUFF.13785.1	chr16:72969534-72970663	+	TATCCGGGGAGGTGGTTTGACCCTCAGAGCTATGGAGTGACGAAACCCCTCGGCCTGGAGACCATCTAAGCGAGACTGGCTATCGTTTGGACTGGTTTGCTGTTGTTTTTTTCAACCCAGGGCCTCGGTAAAGTCTTGCAGGGATGCCCAATAGgtcatagggcctctttcaactctgccatcggtgggaaagcagacacagatgacacagaaatgaataaacgtggctgcgttccaatgaagcttcatttatggaccctgaaatttgaatatcatgtaattttcacatatcacaaaatattctccattttttccaaacatttagaaaagtgtaaaccacgttacctcacac
CUFF.13837.1	chr16:74545227-74547107	+	ctgagccagcagggaagGCAGGATGAGGGCCCTGACAACACCAACACCCAGCTTCAGAAGCCCCTGCCCAGGACCCAGTCGGCTCTTCCCTCCAGCTTTGCCTGAGGGGCAAGGATGCTCGTGTGTGAGGCTTTGAAGTCCAGACCTGATTGGAGAGAAAAATAATGCTTCGTGAATATATTGCTTGATCAACTCCTAGGATTCAAACTGAGCTCATGGTGAGAAGCCTGGATCCACTCGTCTGGGGGTCACAGGGCCCACAACCCATGCTCCTGGGGGTGACAGAGCAACACAGGTAGGGCTGTGTATGCTTTTACTCTTCTCCATTTAAGGATTTGTGGGATTTTTGCTATAATGATTCTCTCTGGaaaaaaaaaattttttttaatGAGCCAAACC…
CUFF.13839.1	chr16:74735260-74742122	+	AACCCGAGGCAGCCACAAAGAAGATTCTCAACAAATAACTGTTGGTGAATCGgagacaagctggcacctgggaccctttactgcagtgcttgcacctagacaaacgtctccttgagcaacaggatacaaagatgctataacggattaaaaataaatgtgtgcatggccagttgggaccgattatgaaaaagatacaaaaaggccaaaacccaattgtcccttctgaggtgcctggagcaaaaggagggtcctgtgcatgatcccctgcacagagcatcacagggggctgggcagaccatccaagccactcctccagcccgaaccatggatccaccccaacgctcacttcatttaagggaccagctggcctctccttgggagtaagcaagcgaacctgtt…
CUFF.13858.1	chr16:74939763-74941969	-	tggttggagaggctgcaaatttgtgttcagatacatctgcaggtggtatggttgctgctggtccagggaccacacCAAGCTGATTCTCAAGCATTCCTAGGTGCCACTTGAAGAAATGCAGATTCAAAGGTCTTGTCATCTAGTAACAGGGTCGATAGAACAACAGGCATCTAACACAGCTGACGgcactgagtgaatgagccaagatttgaacccagatatgccagacctatgctttctcacctcatcacAACTTGCCTTAAGAAAATCATTTTCAAGATGAAAGTACTTTGTCTTTTCTGCCGAGCACTCCTCCACAAGGCTCAGAGAACTCCCCGTCCTAGGACAGAGGATGCAGCTTGACTGATGGGGGAAGCAAGCAGCGCATGACCCGGGAAA…
CUFF.13873.1	chr16:75419049-75420707	-	TGAAAGGCTGAATTCCGAGAAGTGGGTGGACAAGTGTCCTGGCCAAGgcgctggaggtattggcagctaaggaaacagcaagaaacccgccttcgtggagcCCAGGCTGTAGGAATTCAGTTTGCTGACTTCACATGAGAAATGGGAGTCAGAGATGGAGAAGCTTTTCAATCAGGCGGTTCCAAAGTCTGCTTTTGAACAGGACGTGCAGATCCAGACTGTGACCAACCCAATGGGGAGAAGGGTAGACAGTGAAGAAAACCAAACGCTGGTGACACCGCCTGAAGGCGCGGAAGCAGAAAACACCCAGGGAGGCTGAGGTGGAACAACCGAAGAGAGAGCAGACTCAGTTTCCAAGAAAGGACACCTGGCAGCAGGACCAGAGAAGGAACCGTGAGC…
CUFF.13892.1	chr16:76926151-76932748	-	tcctgcccccaatccctcccagcatcagagtcttttccaatgagtcaactcttcgcatgaggtggccaaagtactggagtttcagcttttacatcattccctccaaagaaatcccagggctgatctccttcagaatggactggttggatctccttgcagtccaagggactctcaagagtcttctccaacaccacagttcaaaagcatcaattcttcagcgctcagccttcttcacagtACTTTAGCAATGTTTTAATTAATTAACACATTAACGTCCACAGGTCATGCACTGCGCCTTAGATGAAACTCGGATAGGATGGTTTAGAATCACAGGCCCAACTTCTCTCCTTGGGgcatgcatacatgcttagttgctcagtcatatctgattcttttgca…
CUFF.13942.1	chr16:79161383-79171559	-	ggacacaatctaatcacatgagactttaaaagcagagagcccttctgggttgcagagtgagggtggtatgagatagacgtcgtgagcctgactggattgacgctggagaaaagggggcttgttggggtcctagaagcaggaaagtccagaagggtttcccccagagcctccagaaggaacacagccctgcccagacttgatgttcgaccaactagactcatgcacgactggcttccaacctacaagactgtaagTGCTGGTGTGAAGTGCCTACGGGGAGGGAATTTTGCAGACAGCAGAAGAAGAAAGATCCATACCCTGACCTGTGGGAGAAATAAAGAAGGATGTCTGCTCGAGAAAATCACAACAGGAGTTTCATGATCTGGCTGATGCACATTC…
CUFF.13942.2	chr16:79167336-79171559	-	ggacacaatctaatcacatgagactttaaaagcagagagcccttctgggttgcagagtgagggtggtatgagatagacgtcgtgagcctgactggattgacgctggagaaaagggggcttgttggggtcctagaagcaggaaagtccagaagggtttcccccagagcctccagaaggaacacagccctgcccagacttgatgttcgaccaactagactcatgcacgactggcttccaacctacaagactgtaagGTGAATGACTCAAATTGCGTGGGAGATAGGATGTACAACGTCACATAAAAGGCTGCTgctgctgctgctacgttgcttccatcatgtctggctctgtgcgaccccacagacggcagcccaccaggctcccccgtccctgggattc…
CUFF.13942.3	chr16:79171011-79171559	-	ggacacaatctaatcacatgagactttaaaagcagagagcccttctgggttgcagagtgagggtggtatgagatagacgtcgtgagcctgactggattgacgctggagaaaagggggcttgttggggtcctagaagcaggaaagtccagaagggtttcccccagagcctccagaaggaacacagccctgcccagacttgatgttcgaccaactagactcatgcacgactggcttccaacctacaagactgtaaggggatcttcctgacccagggatcaaacccgcatctccggctgggcaggcggactccttaccaccgagccaccggggaaacccAGGAGGAACAATACATGAATat
CUFF.13947.1	chr16:80098550-80100092	+	gtggaaactggattcagagCACAGAAGGAGTTTACCATGGCGGCAGAGCTTGGTCATGAGTCATCCATTCTGATCCTGTGTTCTAATCAGCTAAGTTTTGGTGTCCATCATTCAGGGAAGCTGGACACTGACACATGCTGAATTCCGGCCAAATTTATCTGCCAAGATAAAGCTATGATACATTAACATCTCTACTCAACAGGATGTACTTCATGCCATCTGGTCATCCTATGAACACTGATTATAAAACGTGGtcctgacaaaactattatttgaaaagatacgcacaccccaatgtttcgtagcaacactgttcacagtaatcaagatgaggaaacaaccgaaatgtttaacaggcgaatgaataaagagagcgcagtccattatacaatgagatgt…
CUFF.14082.1	chr17:6707929-6730527	+	TGAGAGGCTGAGCTCCGGAAGTGCCGGCGCTGGTAATCTGAGTTGGTTCCAAATTAGGAATGTGACCACTTGTGCCAGGGTTCTTAGAAGCACTTCCTCATCCCTAAGAGTGGTCTTCTTTCTCTGGATACTGGCGTGTTTGGATTGTGATGCCAAGGTTTTTTGCTATCATCTGTCTCTTGCCCAaggaggaagctgttctctgaaggatgagagagtaaagattggaggagccttggatccttcatgaccttgttgtgcaacagcatctatcaaccttgccctccctatgaacttccttgttatatgatataataaatttcccaattgtttc
CUFF.14082.2	chr17:6707994-6730527	+	TTCCCGAGGCTCTGAAGTCCGGAATTGGTTCCAAATTAGGAATGTGACCACTTGTGCCAGGGTTCTTAGAAGCACTTCCTCATCCCTAAGAGTGGTCTTCTTTCTCTGGATACTGGCGTGTTTGGATTGTGATGCCAAGGTTTTTTGCTATCATCTGTCTCTTGCCCAaggaggaagctgttctctgaaggatgagagagtaaagattggaggagccttggatccttcatgaccttgttgtgcaacagcatctatcaaccttgccctccctatgaacttccttgttatatgatataataaatttcccaattgtttc
CUFF.14127.1	chr17:9005778-9315614	-	GAATGTGGTTTAGATGGTATGTAGAAGAAGCCTTCATGTAGACTTGAAGCTAATGACCTAGTAAGCAAGAAGACATCAAAATACCAGTGATGAATGTATCATGAGAGGACACAACATCATCATATAAAAAGTTACCCAGACTTTAATGGAATCAAGGGTTGACACGATGTGGTGTGATTGAGAAGAGATATCATAACACAGAGATCAAGGAAGACGTTACAGCAAGCACCAGGAAGTGGCAGAGAGCAGAAGAGAGAAGAAAGAACAGGATCCAGGGAGCTTATCTCCGTGCCAACCTCCAGGAAGCAACAGCGTCGCTGCCCCTTTGGCTCACTGATGCCCTGATTTGCAAACATGCTTCACCTTAAACCAGTTCTTAGAGGAGAAGatgaaaggtaa…
CUFF.14233.1	chr17:13737697-13740721	+	AGCGGGCATTGGAATCAGCGTTCGTTTTAAATGGAAAAGAAAATGCAAAAATCCTGGGGAGATTCCCGCAAGGGTGTAAACACGGAGGCCCTGGAGATGGAATTAGTAGGCCTGGATTTGCTAGTGGAACTAAGTTTTTCCCGAAAGAGGTGACAGAATAACTGAGAACAATCTGCTGGGCTGTGGAATCCAGTCCTGAGCTCACTAGGGAAATAGCAAACTCATCTATAACCAGATCTTCAGCATATTTTTTTTTTAAGAATCAAGAATCAACATTGAGCTATTTTCTGAAAGTAAACCATTAAAGCCCTCCTGGAGTCTGCCCAACGGTCTGCGAACTTGAACCTGAGAAATGGACTTGTTTTTCATCAGGGTGATCTCCTTCTTCAGCTGAATCAT…
CUFF.14249.1	chr17:15060153-15062274	+	CTCTTCACAATTGGCCCCTAAGAGCCATGATATAAGAATATTGGATTTTGCTGATTTAAGAACGTGGACTGAGGCAGACTGGGTCTGAGTGcagcactttatctctgtgtggctttgttgtcctctccttgtccatagtaacttgAATGTGCACACGATTGTCCTTGACAGTTTTAAGTATGTACATGAGGTCAACACTCCAGAAGATCACTGAAGAAGAAGGAATCTGGGTTTGCATATGATCTAATGGATGTTCTGCCTTTCCCATCTGGGATTCTTACAAGAGAGAAAAGTAAACTGCAATCTTGTGTGAGCCGCTGCATTTTGCAAGTCTTTTGTTATAGCTTCTTAAACTCCTCCCTGATTAGTACATTATATTTTGTTTTCATATTTTAAATT…
CUFF.14249.2	chr17:15060263-15062274	+	ggctttgttgtcctctccttgtccatagtaacttgTAGAATGTGCACACGATTGTCCTTGACAGTTTTAAGTATGTACATGAGGTCAACACTCCAGAAGATCACTGAAGAAGAAGGAATCTGGGTTTGCATATGATCTAATGGATGTTCTGCCTTTCCCATCTGGGATTCTTACAAGAGAGAAAAGTAAACTGCAATCTTGTGTGAGCCGCTGCATTTTGCAAGTCTTTTGTTATAGCTTCTTAAACTCCTCCCTGATTAGTACATTATATTTTGTTTTCATATTTTAAATTGCTTGACATAGTCCTTTTAAATTTCTGGTTTCTCATGCTTACTTTTTAATTTTTCTCTTAATATAGTGAAGAGATTTTTGTGTTTTATTTTTCAGGTAGATATATAT…
CUFF.14252.1	chr17:15116262-15154431	+	ggtggtgtttcaggtattgggattggcaccggagcagagctgggctctaataagcctcagaaattctgagtagtttcctttctttagggcacagtcaactggcaaaatgactccacgttcctgtgggaaggactggggtgagatttaggatagcggcctctggctgggttccatgttcctttaaagatcccagccatccctgcagtcaagggcctctgggtttgtgaactggcctcattctggatggatcagAAGTTGTTGTTTAAGACAAAGACTCTGCTCAAGCATGGTGGATCTGTTATGACAGTCAAACTTAATGAAGTCCTTCGGCCTCATCACTTATTATGAGTTCTACTCTTTGGTAATATTATCACTCCTAAACTGCTTGTGTGTGACCTG…
CUFF.14252.2	chr17:15116741-15141638	+	gttaattgccaacacctggtctctccccctctgggatcacattatttccactgagatcaggaaactaaattttaatgcagcatcctcagtgttatctccatcttgcagaggacatctaacgcagagcttttcaaccttctggtgcctatttcatcaatgCCTTGGTAGCCGAAGTATTTTCTGCGCCATCCTATGAGATCTAGACTTAAATGAAGCACAGACCGAAAACGTATAACATTTTGCTCCACTGATGGTTGTTTTTAGAAGTTGTTGTTTAAGACAAAGACTCTGCTCAAGCATGGTGGATCTGTTATGACAGTCAAACTTAATGAAGTCCTTCGGCCTCATCACTTATTATGgcagattctttaccaactgagcGGACACCCACAAACCACA…
CUFF.14429.1	chr17:18574693-18576309	+	TGAGGAGTTTTGTTTTCTGATAACAAGACTGGAGTTTGGGGGTGTTTTGTTTTCTGTTTGAGCGCATAGTTTGCAAATTCAAGGACTATGGCGAGGAAGACATGGCATGCCTTAAATAGTATGAGGGGAACAACAGAGAACCAAAAGCCCTAGGAAAGGAAATAAACTGCTCATTTCAGTCCATAAAATGAAAATGTGGTCAGAGCAAATTAGTAGTAAAAGCTGAGTATGCCGAGCTGCAGCAATTTGCAAAAGCCTTTAATAGACAATCATTTCTGTTGCGGTAGAAAAACTTTATACAGTTACTGATATACCAAGTTATGTTAGCCAGGGGAAAGAAGGTTACGCACCTGGTTGAATGTGTGTTCCAGATAAATCATCCCAGAGACTTTTAGAGAG…
CUFF.14309.1	chr17:19261736-19271868	+	gggaggggtttggatctaaactgatgcctgaggggaaatgggattcaggtgcggggagagggcaccgcggtgtcccagtggagggagcagtagggtgtgtgtgcgaagatcctgaggtggtgatccaggggcgccccttaatagaccttctccctgaaagttggcttcccccggagcccaacTGAGCGCCTTGTGAGAACACTGTACagatatgtgaacatcacttaatagagacagaccgattcccaggaaggcaaggatttggttataacctggcagaatttcccctcaaggaggaggatcgttcagtcatgagtggagagcacagaggtgctcagaaatctccccacctcaaaatcttgtccatggaagaggaagcctcagccacttgaagaaagg…
CUFF.14320.1	chr17:19382578-19393705	+	gaaggcacggcgaagacggaggtggagattgcagtggcgtggggagaagccagcgaattccagcagctccccagcagctgaaagaaacaaggaactgttactctgagagcttccaaggagtcgcggccctgccagtgtttgcatggggatactgacttcagccttcagaaccAGAAAATGAAAGAAATTAGAGGCAACCttaactcagacgatcattatatctactactgcgggcaggaatccctcagaagaaatggagtagccatcatggtcaacaaaagagtccgaaatgcagtacttggatgcaatctcaaaaacgacagaatgatctctgttcgtttccaagggaaaccattcaatatcacagtaatccaagtctatgccccaacc
CUFF.14361.1	chr17:20450159-20465637	-	TGGTGGGTGGAAGAGGAGAATGCAAACACAGATCCTTACTCACGTGACAGCTGCCACCCTCCAGACTGCCTCCCAGGGCACTGTGCAGGCCCACTGTTCCAGCACTTTATCCACAGTGTCAATGCAGATGGATGGAACCTCACTTAAGAGCGGTGCCCTGAGGCACTCGTAATTCCCTGAGAGTCTACGCTCTCCAGTTGAACCCCAGAAGTTCTGGCCCAACTCAAGCCTCTCTTTGGACCACAGTTGAACAATGAAACTATCTGGTACCACAAGCATCATTGGCCTTCAGGAACAAGATTTTCTCGCCAGTGCCCAGTGATTGAGGTGATAAAGAAAATTCCTCTAGGTGCAAAATTGTCTCCATAGCCAGACCACCTTCTTTGACTCACCTTTTTG…
CUFF.14367.1	chr17:21742834-21824383	+	CCGAGCCGCTATTCCTCGGCCTAAGTGCCTCCTTCGGTATCCCTTTATGCCCGTTACATAAGTCCGTCATTACAACTGTCGTGACAAGAACTGAGGAAGAGAAATCAACCTGATGTTTGGTGCCATGAAACAGATTGCTGACTGCCTCCAGATAAGCTTGCATAACTGGATGGGGAGTGCTGCCTTTTATTTGGATGCACAGGAAGTGAACGGGGACAAATTTGGGAGTCTGGAGTGATGAGTTCAAAAACCGTATATAATACGTGGAGGCTCTCTGGGAAAATGTCAAACGGCAGTTGAGGGCGGTTCTTCGTCTGGGAGGAAACACTCCTAACTATCCTTGTGCTGTGTTAACTGGGGTATTTTTCCTTAACTTCAAGAAGATTATTTTCTCCTTTC…
CUFF.14367.3	chr17:21742834-21827271	+	CCGAGCCGCTATTCCTCGGCCTAAGTGCCTCCTTCGGTATCCCTTTATGCCCGTTACATAAGTCCGTCATTACAACTGTCGTGACAAGAACTGAGGAAGAGAAATCAACCTGATGTTTGGTGCCATGAAACAGATTGCTGACTGCCTCCAGATAAGCTTGCATAACTGGATGGGGAGTGCTGCCTTTTATTTGGATGCACAGGAAGTGAACGGGGACAAATTTGGGAGTCTGGAGTGATGAGTTCAAAAACCGTATATAATACGTGGAGGCTCTCTGGGAAAATGTCAAACGGCAGTTGAGGGCGGTTCTTCGTCTGGGAGGAAACACTCCTAACTATCCTTGTGCTGGCCTAAAATGTGGTCAGTTGACCTAATTACTGCTAGAAGTGGAAGCAACTC…
CUFF.14427.1	chr17:29550445-29553218	-	GTAGGGGGCATGTGTTTTAGAGTTCttgttcacctgatgcaaagagctgacttactggaaaagaccctgatgctgggaaggattgaaggcaaaaggaaacgggagcagcagatgatgagatggttagatagcaccatcgactcaacggacatgaatttgagcaagctctgagagatcgtggaggacagaggagcctggcgtgctgcagtccatggcgtcgcaaagaatgggataggaattgtcccacttagcagtgctaagtttgggggatacagagatgaacaagacatgccgtaccatgaagaacttgtaaggggagaggaagacaaAGATGGATATTTTTTACTCTTGTTAGCCTTAAAGGGACATGAAACATGGTCACCATTCTCCAAGATAGGA…
CUFF.14436.1	chr17:29599037-29664632	-	AATGGTGCCTCTGACTGGTTACTTGTGTGGCAAACCCCAGAACGCGGAGCTCTCCAGAGTAACTTTCATTCTTATGAGAGTCTGCATCTCACGCAGCTTGGAGTGTCATTTCTCCTGCTGGGGGTGTCTGGACAGCTTGGGGAGAGCAAGTGGACTCTAAGGACACGGAAGAGTTGAACGTTAGTTACTTTTGTACAGATCAACAGACAACCTGCTACTTGCATGACAAATGCTTTTTAAACCCAAGGACAAGGCCTGAGATGTCATAAGGACTCTATATACCTCAGCAGTTTGGACTACACCACCAGAGTGCACAGCCATTCCACATTCATTTCTCTTGCATCTCCAGCACCATGAAACTGATAAACCCCAGCTGCTGTGCACTGTGCTAGGAAGTGA…
CUFF.14474.1	chr17:30547624-30552942	-	AGGAAAAACCTAGCATCTAGTTGTTGAAGACTTTACAAGACTGTTCCTCATTTAAGCCAAGTCCACTTAATAAGTCCTGGAAAATGTTCTACTCAAGGCAGCAAGTACACACAGAGCCCAAATGAACTATAATTAAAGTGGCAAGAGACCAAGGAAAAGAGCAGTGTTAGTTCAATTGTTTCCTTTGCACGGGTAACAGATGGACTCCAAGGTCTAATAACCCTTTGTACTTCAGCTAAGGCTGACAATGCGTCATTATACTCAGATGGAAGCAAGAAGAAGGTGCCTAGCAACTTGGGCTTGGAATGCCTAGGCTTTTGTCAATTTACATCATAATCTTAATATTAAACAGGCTTGCTCTCATTTGCCAGTCATCACCTCATTTTATGTTTTTCAAAC…
CUFF.14478.1	chr17:31081363-31123904	+	AATGAGGTGCTGTGGGGACTCGTTGAAAGGACACAAGACAGAGATCGGAGAAGATTCCCCAAAAAGGTGATACTTAAAGGATGACAGAGACTAAAAGAAAAAAGCATGTTGTTCTAGCAAGATAGGGGTTAAGCAGACACAGGATGAACAGGATGATTCTGATGGTTGTATAGGTGCGTGGATAAATTTGTTCAGAATGTTGTTTAGGGAGAGAGCACTAAGTGAACAGAAACAATCTCCAAATGGAAATAAACCCATGGCAATGAAGCATCATAAATGGAGAGACTGCAGCAAGTCTGTAGAAGTTGGAAAGTGAATATGAGCTGGGAAGTGGATTCAACATGGTACAAAAAAAATTATTTAAGAATAATATGATCCTATGAAGCTTTTAGAGGTATT…
CUFF.14490.3	chr17:31449989-31466359	+	agttggtgatggacagggaggtctggcgtgctgtgattcatgggatcgcaaagagtcggacacgactgagagactgatctgatctgatctgatGGATGTCAAGAAGAAAATACATTCCCAGTGGAAGTGCTAATGTCAAATTCTTAAGGAGAAATGGAGTAGCTATTTCTGAGAAACCAAAGGAAGCTGAGCTTGATGGGAGTTTAGTAGGGGAAggtttacccagggctgaggggatttcctggaaggtgagattttttcagggttaaaatgaagacagtctcaggcaagccTTGGTCTTGGTACtgggatagacaacattctaagatatccaccaagattcctccctgtgggctacactcagcttctttccaattagtcaaacaagcacagaagatg…
CUFF.14490.1	chr17:31449989-31829949	+	agttggtgatggacagggaggtctggcgtgctgtgattcatgggatcgcaaagagtcggacacgactgagagactgatctgatctgatctgatGGATGTCAAGAAGAAAATACATTCCCAGTGGAAGTGCTAATGTCAAATTCTTAAGGAGAAATGGAGTAGCTATTTCTGAGAAACCAAAGGAAGCTGAGCTTGATGGGAGTTTAGTAGGGGAAggtttacccagggctgaggggatttcctggaaggtgagattttttcagggttaaaatgaagacagtctcaggcaagccTTGGTCTTGGTACtgggatagacaacattctaagatatccaccaagattcctccctgtgggctacactcagcttctttccaattagtcaaacaagcacagaagatg…
CUFF.14520.1	chr17:31977407-31980082	-	TCTGTTGTTACTGTCTACTGGAGGTTGGATCTAATAGGATTTGCTCAGCTGTACTGCAAGCAGAACTACACTGCAGTTATTTATAAAGGTTATCTTGACCAGATTTAGAACAAGATATGAAAATAATTTGCCATTTGTGGAAGAAAAAAACCCAGCAATTTAATATAGGTCTTCACAAATATAAAATTTAAATACATTGGTGGCATGTCAAAAATCTAGACTGTAACTGATTTTATGAATATTAAGTAACTGTTAACTAACAGCTAAAGTAAGAGCCTATGAGTCTCATTGTATtttatctgcttttaataatgctggtcttatagaatgaattaggaagtgtgccctctgtttctattttctggaacaattatacagaattgatataatttctcttta…
CUFF.14676.1	chr17:52970213-52971116	+	caggggggaaaaatgtttctcctctctcagccctgtgaggacataagcctggagttccaggaaaatcctgaGTTGTGATTGAAAAAGCAAGTGGATGCCAAAAAGAATGAGACCGCACTAAGCAGCCTTCAAGGTCTGGGGACAAGATGGCAGCAGGCATTTAGAACGAGTTTATGCTGATGTCCGTGGCAGTTGTGGCTCAGAGAGAACCTCGGCTCGTCAACGCAGTTCAGGCTTCCTGGCTGAATCCGACAGGCTCCCCATCACCCTGGCTGTGTGTTCAACATCTATTTGC
CUFF.14676.2	chr17:52970244-52971116	+	cctgtgaggacataagcctggagttgaaaatcctgaGTTGTGATTGAAAAAGCAAGTGGATGCCAAAAAGAATGAGACCGCACTAAGCAGCCTTCAAGGTCTGGGGACAAGATGGCAGCAGGCATTTAGAACGAGTTTATGCTGATGTCCGTGGCAGTTGTGGCTCAGAGAGAACCTCGGCTCGTCAACGCAGTTCAGGCTTCCTGGCTGAATCCGACAGGCTCCCCATCACCCTGGCTGTGTGTTCAACATCTATTTGC
CUFF.14720.3	chr17:54576204-54581380	-	AAGACGGGGGGGCTCTCAGGCCTGAGGGCAGCTGCGGCTGGAGAGCCGCGCGTGCGCAGACCGGGAAGCGAGTTAGTGATCCCGCTCCTGAGGTGATTTCGGTTCCTCTAGAACATTGGGGACGGAAGGCCATTCCTGAGGTCAGgtggtataacctccattttacagatttggaaacatggccagagCTGCACGGAAGGGGAAACAAGACCATGACTAAGCAGGTAAACAGCCCTGCTGCATTCTGGCCTCAACTTCTGAAATATTACCAACATAAGAGACAACAAGCTCTGAAAAGCAGCTGGAAGAACTTGCTAATTCCTGTGTCCTTtgcttctcaaacttgaatgtgctgctgaatcacttgaggatcttatgaaaacgcgggttctcatgtag…
CUFF.14823.1	chr17:56457415-56458267	-	CGCGCACTGCAGCCTGCGGTCGTCTTCGGCGGAGCCCTATCCCACGGCCTCTTTTTGGTTCATGAGGATCACGATTCCTACCCGGCTCAACCACCTGCAGACGTAGAACCCAGGAGGGTAGAGGGCTCACGAGCCCCTCTCAGGAACGGAGGAGAGGAATTCCGCAGTTCACATCCCACGCGGCCAAAATCCCTCATCTGTCGCTTCGGGAACACCGCATCCCACACCCCCTGCCGAGAGCTCCACCGCACGCAAATAACCAGCCCTACCCCAGCGCCTTCTGTGCTCAGAGGGAATCCCACTCTGGGGAGAGGAAGAAGGAGGTTTTATTTTATCTTTAATACCCCACACAGCTTTTTATACGTAGAAGTCACAGATTACACTACTGTAACTTAAATA…
CUFF.14897.1	chr17:58374887-58385442	-	TGTGGAAGATGTCCAGAGTGCCTCCTGGAGGTCTGAgggttccgtcaagatctggttgttactttgcaagaaaatatgaaactagagttgttccctcagacaagaatttgcttcatgatgaccagatctccacccctctgctgtgcttgggcatctttctatgcacacagaaacttcccattcaatgctgactcttatcatggcatcatctttctgaaaatatgttaatggtgattgaaatcaacatgtggaagctgggcagtgtacataactcagttgaagtaaggaccatctgaacagctaggaccaagttggcttgggtacagggagtgaaatgagatcacaccaaaatgcatctcagtttcagggatgttaaaatcagaaaaagcgtgcatctta…
CUFF.14898.1	chr17:58393321-58404329	-	CATCGCCTTTAAGCCTCCCTGACCCGCAGGAAGTAGGTGTTACCTTTACAATGAAGAAGTTGCCTCTAAGTGGCTTGGatgaggaaactgatgcaagaaaggactaagtgtatagccccaaatcatacacctgGTAAAGTCCTTCTGTTTCTCTTGAAACCAGTGAACACCAGCTGCTACAGTGCGACAGGAAGAGAGAGAAACAGAAAGAGGCAGGGCTGAGCGGCATCTCCACGCCACCTACAAAGggacatctgagttctgatccagctcaacaactaactcctcccatgaccctgggcaagtcctcctacctcttcctttgctcctccacctCCTGGAAACATCCCATAAACGCAGTGTGCTGGGGATCCTGTCCTAACCCACCTCTGCTTCTCC…
CUFF.15017.1	chr17:62828247-62828707	+	AGATCTGCTGGCTGTGTGACTTGAAAAATAAAAGTGACATCCTGAGAATCATATCATATGGGAAGGGTCCATTCCTTCCGCCACTGGTGTCACCAAATTACTGTAAGGATGAGGCAAGTTTACTCAGACCTGCCTCATgtacagacctcagagttcgtggtgctatgtttggacactggaccctcactcactgtgcatagatttgggcaatgactctgcctcagtttcctcacctgtaaaatgggaataataaaacctcaaggtgctgctctaaggattagcggagacgatgctggacaaacaaacaagctctgcaaacataagctgcAGTTAAGTGCAGGGAGCTCTACTCCACCCCATC
CUFF.15055.1	chr17:63800044-63801293	+	ggacccagactagcacaTTATCCCAGAAATcacctgttacctttgcccgagcagcacacagttccctcctcctgactgtctttcaagtaaatcacttctgccctatagtctgtccatgaggtctgggtgaaactgatgtctccctctactccagaggttggcccctgcataagcctgaccaatctactggattggccacaatagccagtgtttggtacagagaagggcatgggactcgatgcaaaccaatgagatccccatctgaaactttgctagtgctgttaggaagaaggcatacttttacattggattgctaagctggtagaatataagtccggagctgctgaggggcatttttgcttctctccagcctgagactgaagtctacgtaaaagagag…
CUFF.15173.2	chr17:65732029-65734236	+	agaaacagcctaaatgtccgtccatggagagacgggtcaagatgctacgttaACCTGGGGCGAGGGCACGCTTCCTGTCAGGTGGGGAGTGATCTCCCAGCTACATCAGGAAGGAGAAAAAGGCGAGGCGCCGAGAAGCATCGGGCTGTGCATGTTGACATAAAAGggtagatggaatagacgccgtgtcaaagaaatagaaaattagggaactgttgaacactgcagcactggaaaaaggatcccagcctttcctatgattagtaggtacacagagaacttagatcacacggggaaagacttttcaaagccattgaaacaaagcactgcatgactgaactaataccagacatctgttgcatcaataaatgtaaatgggctaaactctcctattaaaca…
CUFF.15232.1	chr17:66737222-66763469	-	GGAGGCTTTGGAGTCAGCTCCTATGGATGCCAAATCGGAGGCCCTCCCACGCCCTGCCGCGGCTGTTTACGAACTGCAACGGCACGTTGTATCATGaatgtaactgccacgcatcatgagaactgactgtacttgacataaactaagctgtcttaattagatgcacaaccttgtcaagcaggaagatggtatgatgctccatcttacatcgaggaaactgaggcgcggggccgctaagtgtcttctctgaggtcacccagccagcgtgcagtggggccaggatctgaagccacgtgatctgactgGGGGACATGAAGACCCACTGTGATACTGGTCCATCTGACTGTATCTAGTCTCCGGGTGTGTGCGTGAGGGCAGACGTGTGAGAAAACCCGAAGT…
CUFF.15277.1	chr17:69362540-69363772	+	ACAACGGGGGTGCAGAGCCCGAGAGATCTCGAGGAAGAgcagggagcgccatccagacaggtttctcacgacagcgttttcttcccactgcatttatttttgaagacaccttctgttggcagccactgatatcggtttcctgttatgttcagcgagataaagcttcccttttaagaaatctctgtgtgtgtttgaagtgagtcaacttaaagaaaatgttagAAAAGCGTCCAGTCATCCACCAGCTTCTTCATCCAGATCCTGTCCAAGACACGTCCCTATAACATAACGTCAAGCTAATGACTGCAAGAAAGAACTGCAAGGAGATAAGAACAAAGCTTCAAATACTGGTGAGACCTGCCAGACGAGAGGAAACCAGCCCTGAGAACGTACAGAGGA…
CUFF.15278.1	chr17:69429225-69429932	-	AGACCCGGCTTTTTTTTTTTTAAGCAAGTGACCTGAAGGCTTTGCGCTCACCATACAACACCCACATTGTTTATTTCAAAGAACTTTTTAGCAAAGGGAGAAGAGCATCCAGAAAAATCTGGCTCTTTCCACTTCCCTCTCCTCGTCTTTCCTCCTGCTGGCCCTTTTGGCTCGGGGTCTGAGTCTGGACCGTCTGAAGTTCCTGCATGGGCAGTTTGACCTGGGTTGGCCCCGGCCCCTGCAGAAGGCAGGCAGGAGCAGCTGGTGTGGACTGATCAAAGAGAAGAAGGAATGATTTCTCCTTAATTGCTTAAGGCCGGGGAGCCAAGTGTCTTGACTTCTGTCTTTGACTTTCCCTGCGTTGAGGCCATCAGCTCATGGTCCTGGCAACCTCGGAAA…
CUFF.15281.1	chr17:69588626-69620632	+	AGGTTCGTCTGCGGCTGCGCGGGCTCAGCGCGTGTTGGCCTGTCTCCAGGCGGCGGCTCGCGTTTCCAGTCTGGTTCTATCGAGGGAGGGGAGGTCAGTGCAGCCTGCGCTCTCTGgacgcagattctccgatttggatcccggacagactgattcgtcatatcgcagccccccagacacctggtccccctattgcctagaccacaaaaaaagaagggacatcctctacttccactccctccaccaatgtgggaagtcccgctgacctcgagactaatgacaccagagatcccggatgaacaggaagaagaaccaccca
CUFF.15305.1	chr17:70359883-70361211	-	AGCAGTTGATTTGTGGTTGCCAAGCCAAGGAGGGTACAGAAGAAAAACAAGATGAAATGGAAAAGGTCAACAACCTCATTGTGCAAAattctgctcccagagaggagATAAAGGCAGCACAGCGCTCAGGATGAATGACTGACTCCAAATCAAGGTTTTTCTGGCTGTGGTTCTAATCATAGTGTTGGAAAAATCAGTTCATTGCACATGGAACAGaaaaaaaaaaaaaaaaaaaaCAACTACTGACTGCAAATAGTTGAGCACAGGTGAAGGACGGAAATCTTCAGGAGAACCTCAAGTCAGTGCAAACTGTTCTCCTTCTTGTCCTGGTCCCTGGAAGAGTAAGGGGACATTTGCTGATCAAGATTAGGAGTGTCCCTTTAGAAAACTGTTTTCAAT…
CUFF.15398.2	chr17:71963314-71972732	+	GTGGGCTTTCTACTTTGCCTTTTCCTCCTTATGCCGCCTTAGTGAGGGGCGGGAGCTCTGGCGGCAACTCCGGGgtggagaagcgagctccggagtcggaagagctgtgtttgcttccgggcctagccaccagctggccgagtgaccttaagcaagtcactcagtaatttgtctgcgcctcagtttcctcctctatcaaCGTTTGTGGGATtgaaagcgctttgtaaaccataaagcgtcggtggatgaaaggaatgattattgttCGTTATGGTTGGCtttttttttttttttttttttGGAGTTGTAAGAAAACTTAGAAATTCCCAGTCCTTGGATATTGaacctggaaaccttggattggagatggagatccccaaactccctgaaattgtgtgc…
CUFF.15398.3	chr17:71963314-71972732	+	GTGGGCTTTCTACTTTGCCTTTTCCTCCTTATGCCGCCTTAGTGAGGGGCGGGAGCTCTGGCGGCAACTCCGGGgtggagaagcgagctccggagtcggaagagctgtgtttgcttccgggcctagccaccagctggccgagtgaccttaagcaagtcactcagtaatttgtctgcgcctcagtttcctcctctatcaaCGTTTGTGGGATtgaaagcgctttgtaaaccataaagcgtcggtggatgaaaggaatgattattgttCGTTATGGTTGGCtttttttttttttttttttttGGAGTTGTAAGAAAACTTAGAAATTCCCAGTCCTTGGATATTGaacctggaaaccttggattggagatggagatccccaaactccctgaaattgtgtgc…
CUFF.15519.1	chr18:950470-951238	+	aaggagggaaaagtatatgaaatgcttgggattgagagagaatatggatgctgctggagcaagATGATTTTACAGAAGAGCAGTTCTCActcaggggacatctggcaacgtctggagacattttgaccaccacaactaggaggatgctacagagatgctgttaaccatcctacaattcacaagacagactcccacaaaaagaattattccatccca
CUFF.15627.1	chr18:4820798-4877129	-	TCAGGTCGCAGGTGAAAGTGCTTCCTAATCAGAGGTCCGTAGCGGAGGCGATTCCCTGTGAGTCAGGTGGACCCAGTAGAATCTTTAAGAGAGGAAGCGGGAGGCGAGGAGGAGTTAGTGTCTAGGGTCTACAGCTGGCGTCAGCCTTGCAGGATAGCggggtcaagagtcccagggtgcaggcagcctccagaagctggaaaatgtccagggatgacggattctcctctggagggtccaggaagaagtccagccctgccgaccacctgaccttaggcccgtgagcctctcctcgatttctgacctccagaacgCTTGATTCTGACAACAGAGTGTGAGAGTCTTGACAGGAGACCTCACTGACCAGCCCTTGAATTCTGCGTTTCCTTGAAACTCAAC…
CUFF.15655.1	chr18:7125589-7129122	+	tggcgttggctgattttctggtgtaagtgttctcaccacggccaatttcagttgccagtgtgataccagttaacacagagttgggaagagatgtgtcagctcttgtgagcagatcagaaattcaggatgggttcagctggctggttcatctattatctggaatgattaacctgtcatgcaagcagagctgcagggtcacttccaaggtggtattttcactcacaagccaggagcctgggctgggaaagctgaccgtggagttcatctggggctggtccacacaccacctacgtgtggtctctccttgggccttacacctgggttcccagagggagcatccctaggacaagcattctaagaggtttaggatgaagctgcaagactgtgtgacccggccgt…
CUFF.15686.1	chr18:8348919-8349550	-	TGGGGGTCTCAAGGGAGCAGCAGGACGGGGTCCCCAGCTGAGTCTAAGGTCAGGGGACGAGCAAGGGGCCTGAGGCCGGTCTCCGCCCTGGAAAACCTGCTGTTCATTGGCCCTCCCGGGTGCCTGCACCTGCCGTATCAGATTCATCTCATTTATCTCAGAAATACTGGCGCTGCaaacgcaaggcctgagaggtgaaatcacgtgatcaaggtcatggagacatgtggcaacatcaggatgggaaccccatgcccctgctccTTCAGCAACCCCCTTCTGGAATTCACAATCTGGTcagatagtaactaaccgcgcagagatatcaaaggactcgtccaaggtcacacagctgcaaagtgtcagaagcaggacaatgctctcgagttccccactccc…
CUFF.15742.1	chr18:10854824-10856136	+	ggggactgaggggggctgaaaactACTGTCCTCGGAATGACTGAGTGTCAGCCACGCTTGGGAATCACTGGTGAGGTGGTTTTTTACAGGCAGGGCACAGAGGCTCCTGGAGAGTGACCGAGGGTCACCAGCAGCCCAGGCAGTCAGGTGAGGTGTGGGACTTCTCACCAGGGACGTTTCCCCACTGGGCTTTCTTCCTCAGGTGGCCATTTCTCCCGGTTGGTCATCGTCCCGAATTCCAAAAGGGAACGGGAGAAAGGAAAACAGGCACGTGGCTCTTGATAAGCGTTATTCTGTAATTTGTGCTTTGGTCTTTTTACTGTCTCTTCTGGAAGCCACTGTTTATTAGATTACTGATGTACTGAGCCCCGCCAATCTCCATTTATCACTCAGGAAAGA…
CUFF.15895.1	chr18:17297103-17299059	+	GGCTGATGGATGGTGCATGGGGGTGTTTGCTGGGTGTGGGCTCAAATTCCACCCATGACCGGAAAGAGCTTTTGCGAGTAGCCACAGACCAGGGTGGAGATGCGCAGGACAAAGGCACCAGGTTTCCGGCTGCTTCTTTGGCTTATCTTCCAGaactcttcagctctgcatcctgagcagccatccccaagaaactagagctgtcatgagtaaagaaacccaGAAGATGCTGCTCTGGAGCAAACCACTCATTTCGAAGAAGAGGAGGTCTCAAGTCCCAGAGGTGGAAGGAGAGTTGTGCAGGATTTATGGCAGAGGTAGAACCAGAGGCACTCTCTCCACTTTACATCCTGGAAACTCCAGTCTCTTGTTAACCTGTCCATACCAAATAGAGTCATT…
CUFF.15941.1	chr18:21986505-21989588	+	GTGATCCCGATGGGTGCCAGGATTTTTCTAAAGACCTGATGAATGTAGTTGCCTCTTACTCTGTTCTGAGGAATCCAGAGGAACCCAACTCAACTGAATGAGATGTGCAGGAGAAGGCAAAGCATCCATGGGAACAAACAGGACAGGATATGGAAGAAGGAAAAGCAAAGTTGGGATGATAATGATCATGGCAAGTGGTGGCATTTGGGCAATGAAGATGAGTAAATTATTCTTTCTTCCTAATCTGAGCCTGTGGTGATGTTCTATTGACTACATATGCACCAGACCTGAAACATGGCCTGTGGCATGTCTTCCAGAGACATCCGAGTCTAAATCACTCAGGAGGAAAAAACGAATTACACTTCTGCTGGGAAAAAGTATTGAACAGGACAAAAATCT…
CUFF.15945.1	chr18:21991308-21993552	-	GGTGAGGTCAGTACAGGCCGCAGGCGGGAAATGTGCTCAAATGCTGACTGCCTGGAAGGTCTTTTCCATTTCGGAGTGTCGGCTGTGGGTCAGACCGTCTCAGGGAATAAACTGTAAGTGGAGAATTCTAAAGTCAAAAGGAACCTTGGAAGCGAAGGAGGCCAAGTGTCTTCACCTGGGAGGGAGCTGAGGGCCAGAGAGGACAGATGTGTGAGGCGGGCTTTGGCCCCTACCCCGTGGTCAGTCTCCCCTGAACCTTGGCAGAGGCGGTTTTCCAAAGCCTACACATGGTTGCTTCTCTAGTCCACAGTCTTTCTAGGTTGACACGACAGTCCAGCCAAACACAAGGGCTTTGCGTTCCAGACAAGAAGTCGGTCCCACAGAGCTCCGCGATCAAGG…
CUFF.15960.1	chr18:22659582-22661841	+	ACAGAGCCAAAAACATCTGCCCTGTGGACATGCTGTCCCGTGCTACCACAGGGGTGATGGGGAGAAAGCTGACATAGGAGAGGATGgttattacaagatactgaatagtgctccttctgctataaaGCCCTGAAACAATTTGCTTAAAGTGATAGTTACCTCTAATGAAAAGATACATAACGGAAAATGTCAGCAACCTTTTAAATCCTCCACAACTTATCATGAAGACCGTCTTGTGCAAAGTGCTCGT
CUFF.15961.1	chr18:22795092-22796986	+	TGGTTTGGTTAGGTTTTCTAAAGGGCTGAGGTGGAACTTGGCATCTACTAAGCCAGCCTAGAAGAAAGGAAGTTTATTTTCTGGGTCAGATGAAAAGACTTTGGGTTTCTTGATTTGTATTTTCATGGAAAAGGAGCAACTTGCTGCCTTTGCTGAATCGCCCAGACCCTCAGGTCTTCTGCTGTTTTTCCAGatctgcttccaacaagaaccagaaaggacttcgggcaattTATAAGGACACGCTAAATCAAACAAGATGCTCTCCCTACCACTTCCCCTGCCCCGCTGCACC
CUFF.16016.1	chr18:25081543-25084973	-	GGGAGTGGTGTGCGGAGCAGTGGGCCCCAGGGACTCTTGGAGACAGCCTAGCACCAGTCATCTGAAAACAGAAGGGAGTTCCCCAGGACCTGCAGCTGGGGgatcacgtggctcttcctctcctgaattctcacttatccacattctcaacagcttctttcaggtttgaacgggtatcaggacttccccgcatggctcacttcctccacctctgaaatgaaaccatcggcaaagccaagtGATACGTCATCTGCTAGCCATGGATCTAACTGCATTTTTATACTCCGGAGACCaagcgtggcccctcaaccagcagcattggcaccacctgggagagagcttgttggagatgcagaccctaggcaccacgctcggcccaccaaggtagaaactgagcct…
CUFF.16016.2	chr18:25081543-25085255	-	tgccacattctgtctaggatagccagtcactccaggacctcctgcttaagatctcctgtctaataaaccattgatgtctctgttgctgtttcctggcccgtctttggtctcaaggctggcttctttcaggtttgaacgggtatcaggacttccccgcatggctcacttcctccacctctgaaatgaaaccatcggcaaagccaagtGATACGTCATCTGCTAGCCATGGATCTAACTGCATTTTTATACTCCGGAGACCaagcgtggcccctcaaccagcagcattggcaccacctgggagagagcttgttggagatgcagaccctaggcaccacgctcggcccaccaagGTTCAGGCTGACGCCTCCCCAGTCCAGCCGTTCTGCACCAGTGGCAAAC…
CUFF.16079.1	chr18:31093030-31119633	+	tgagtgcagagacctactcctctcaaggtaggaggacaaggatgagtctcccatatgctggcagaagacatgaaactgtttggtcagagacaaagaacttcatcacatcacatcaaagatacaGACACCTCGCTGTGTGTGCtcagtcatgtccgattctgtgaccccatggtctgcaaccttccaggctcctctgtccatggaatttcccaggcaaaaatactggaatgtgttgccacttcccattccaggggatcttctcagcccagggatcaaacctgcatctcttcaaacccacatctcttgccactagcatcgcctgggaagccTAAATGTCATCCTCAAAACATGTTTGGTCAATGAATGAAGACACAGATCACTGTTGGGAAACTAAATTCC…
CUFF.16079.2	chr18:31094995-31119633	+	tgatgggggaggcattacggatactcCTGGTATTAACAGTTGGTTAAATTGATAGTATGTTGAGTTAATCATATTTTATGAGCCAGAAATGTTGCACTTAGTTTTATACTCAACAGCAGTTTGGTATCATTTATTGGTAAGACTTTGCTTTCCACTTCGTACTAAGTTGGTGACTTTGTTGCAAATCAAGTGATCCTGATGGTGTATTCCTAAACAGatgctggcagaagacatgaaactgtttggtcagagacaaagaacttcatcacatcacatcaaagatacaGACACCTCGCTGTGTGTGCtcagtcatgtccgattctgtgaccccatggtctgcaaccttccaggctcctctgtccatggaatttcccaggcaaaaatactggaatgtgttgc…
CUFF.16110.2	chr18:31433064-31448054	-	AATTTACTGCTGCGTGGACAGAGGTGAGACAGCGGCACCTTTAGCGTCCTAAGAAGTTTTTAAGACAGAAATATTCTTTTTTACACATTATATGCTAGGATGAGCTAATTGCCGAATACATCAACTTCCATCTGCGACTGACCCCACAGCTCTGTGACAGCTTTCGGTTTCCAAAGGCCTTGCCAAAAACCATGTCTCTCCTGTCCTTAGGAGGTGCACATGCCCAACGTCAGGAAAGCAGCATTATGTAAAGGAAGAAAGCAAGGCAAGGGATCCCATTTGGCAGGTCTCCTGACACCTACAGGACACCGAAGCCAGGCCCTTCAACAGACGGCGGCGAGGCAGagcacaggctctagggaccctggcttctttcagttgtttggctctaaggaaagt…
CUFF.16096.1	chr18:31748043-31754162	+	GAGAGATTAGAAAGCACTTTTTCCTACAGGAAGTACTGTAGACACTGTGGAGCTGGTAGGACAGGTGGTATGAGGCGTTCTGTGTGGCTTCCCCAGGGATTTTATGAAATACAGAGAAAAGAAGAAATAACTTGGACAGTGATGGtggtaaaagagatacgaaagaggtcatcagggaagatccttaaaggaaagggaaatgtttggaggagaagtcaaagatatagagaagactgctgaagaactgctgtgggtttctgaaggcaaaataaaaatgtttcagGAGTCAACAACACCCAAACAGCTTTTTGATGCAAGACTATGAAGAAAAACAATTTAGCCTGATGTTTTCCTACTAAAGATAAAAACATGGATAAAAGTCTAAAGTTTTGACTAAAG…
CUFF.16100.1	chr18:32128623-32192705	+	acgcagcccactccaaattgTTCTTCCAAAAGGCAGCTATCTATTTGTAAGCCAAAAGAAAACTTCCTTTTTCCATAACCGAGTTTATACAGTGAGAGTAGAGCTTGAGGAAATGAAAGACAGCTGGTGGTTTGGTCTAGTCTCAGAAACACTTTCTTCGTTTACAAGGAAGAGGAACCCCACCATCACCAAGCCTCATCCACACATGGGCCTGCTTAATGTTAACCTACACATGGAAACATGATTTAACTGCAGCTGAAGTGGTACTTTTTCTCCTGCTCAGTGTTACTGCTTCTGAAGGAAGAAGTAACTTTCTGTGGACTATAATGCACAATTTTTAATACTGTATTATACTTGTATGCTTCAGAGTTCTTAAGAAATTGACAGTGTTCATCTGAT…
CUFF.16130.1	chr18:33704235-33713502	-	attgatgtcagtcaccatggccaatgatgtaatcaatcattcctgtgtcatgaagcttctacatgaaacaaaaggctgggtttggagagcttctggttggtgaacaggtggagattcctggaggatggctggctggagaaggaatggaaactctgtgctttgccctatgcatctcttccatctgactattccagagtgctgtctttctgtgataaaactgtaatctaGAGCCCATCAGGAGTATGACAGCAAAGTCGGTGCAGTTCAGGCTTTGACTTCTCCTTTTATCACCAAGATTTTTTGGCAGAACATAGAAGGAATTCCAGCCCACAGGGAGTTGCCCCAGAAATTAGATTCAAGAGACATGTTCAAACCAATCTGCAGCATATAAATTTATAT…
CUFF.16130.2	chr18:33707540-33713502	-	attgatgtcagtcaccatggccaatgatgtaatcaatcattcctgtgtcatgaagcttctacatgaaacaaaaggctgggtttggagagcttctggttggtgaacaggtggagattcctggaggatggctggctggagaaggaatggaaactctgtgctttgccctatgcatctcttccatctgactattccagagtgctgtctttctgtgataaaactgtaatctaGAGCCCATCAGGAGTATGACAGCAAAGTCGGTGCAGTTCAGGCTTTGACTTCTCCTTTTATCACCAAGATTTTTTGGCAGAACATAGAAGGAATTCCAGCCCACAGGGAGTTGCCCCAGAAATTAGATTCAAGAGACATGTTCAAACCAATCTGCAGCATATAAATTTATAT…
CUFF.16245.1	chr18:36508411-36510847	-	GAGGCCACGCCCACCTTCCGGAGGTGTGGGGAGAGGACAGCCGAGCCGCTTCCGGGAGGTTAAGGAGTTGCCCGCAGTCCAGTGGGTTACAGCGGCAGGTCTCGTGGTTTGGGCTCTGTCTCACTTTCTCCCTCGTACGCCTCCGATCTCCCCACCCCCAGCTCCTCTACCGTGCAACTCGCCAGAGCTGCCTGGGCACGGAGAGTAAAATCAGCTTCGAGAGGCACTTCGCAAGCCTGCAAGACCCAGTTGCAGATTGGCCAAACTCACCCAGAGTCTCCCAAGGACGCCCCGCACATTCCTGCTGGAGACCATCCTTCTAAACGCTCCCTGCCCCTTTTAACCACTTAACCACCTTGCAAGATCTCATCCCAGTTTTCTCATCTTCCCAATTTGTTG…
CUFF.16295.1	chr18:37152134-37157134	+	gagtgcgggctttctctaattgtgGTGAATATTTTTACAATATTGATAAATGGGCCCAAAGTGTAAGACACTGCTTATGAAAACAATTACATGAAAAGTAGAATGTGCATCATGAAGAGCCCAAGAAACACTAGAGCAGTGGCCTGCAGGCTACCACCTGAAGCTTAAAAGTTGCTACTTGAGATTTGGATCAAAGTAGCAAGCTATCGCATCATCAGTAATATAGATATGAATTTAATACAGCTGACAATATGGCTACACCTCTCTTGGAGCTTTGAGGAATGAAGAATACAAAAACAAGCCAATAGCTATTATTTTCCTATATCCCTGTGCATCCCT
CUFF.16393.1	chr18:41230422-41231260	-	tacagtccatagcatcgcaaagagtcagacacgactgaagcgactgagcacacatgcaCAAATAAGGATTAAAGGCATGGGAAAGCCCCACAGGGCAAGGCAACAAAATGTCATCTCGGGGTAGCTCCACTGCTGAATGAATCAGACCCTCGTGtgcttgctgagtcacctcgggtaagCTTGATACTGGAAATGCAATAcaggtgacctttgaacaatgtggatctgagctgctcgggtccacttacacaaggatatttttaaataaatatatgtatgtgctgcaaa
CUFF.16824.1	chr18:53167790-53169199	-	AGCTCAGGCAACGGAGAAAGGAGTGGAGGTGATAGGAATAAAAACATATGCTTGGTGAGGCTAGGCCAACTGATATGGAGAGAAGCAAAGGGATGGAGAACTTGAAAGGCTATAGGAGTTGTGTTGACTATATGAGTACAGGTGATGGATGCTGACAGAGGGAATCTCTGCCTGGAGACAAAGCCTGTCTCCACTTGCTGGTTAGGCTCCAGCTTTCCATTTGCAGACTGCAATTTCATCAATGACCCTCTTTGGATGTTGTGGTTATAACAGACGAAAAGAAAAAGCTAGACGAAGGAAGAAATTCCGAAAGCAAGGGACGAATCTTCCAACCGAAATACCCGGCGATGGAGCAGGTAGATCACGGAGCCAGTAGCGAACTAGCACGAACTCAAGCCA…
CUFF.17018.1	chr18:56531777-56534262	-	AAGGGGGAATAAAGGAGCTTGTGCCCATTTTCCTGCGGGAAAACTGAAGCAGTGAGAGGCTCAAGGAGAGGGAGGTCTTGGCCAGGATCCCGAATCAAGTCAGAAATGGGACTCAGGCATCGAGatggcagccacatgggacaactgagtaatgggccatgactagtcttagctgagataagctatggctgtaaaacaccagattctgaagacttcagtgctgcattaggtcatagaccacgaaatggacaagatcactggagagttcgtgtgattagaaaggtggtcagaagacctgagtcAAATTGAAGAGTTGGGTGTCTCTAATGAGGCCGCAATGattctgctaaaaccagcactggcaagaggcccccagtctcaggtgagactgaagctgag…
CUFF.17118.1	chr18:59497040-59501121	-	AACCCGGAAGCGGAGCGCGGCAAGTGGAGGTCTCTCAGCTCAGCGATGTGTGCAACATCTCTCTTACAACATCTCACAGACTATGAATGTGTGTTTGGCTGAAGAATTCTCAGGGGAGATGGAGGTTACAGGACCTCTGAAAACTTGTGTTGCCTGAGGAAGAAGCCAAGAAGATGAAAGAAAATGTGTCAGGAATCCCTCTTT
CUFF.17118.2	chr18:59497040-59501121	-	AACCCGGAAGCGGAGCGCGGCAAGTGGAGGTCTCTCAGCTCAGCGATGTGTGCAACATCTCTCTTACAACATCTCACAGACTATGAATGTGTGTTTGGCTGAAGAATTCTCAGGGGAGATGGAGGTTACAGGtgcatactgggaatttgtcaggagagtacatcgtcagtgttttcacacacagaacatgggattttggagACCTCTGAAAACTTGTGTTGCCTGAGGAAGAAGCCAAGAAGATGAAAGAAAATGTGTCAGGAATCCCTCTTT
CUFF.17345.1	chr18:62963673-62968705	+	CCAGAAACAGCTTTGAAGTCACTTCAGGAAAATAAGCCTCCGTCGTTAGAGCTGGCCCAAATACAGGAAGAAGATGTCACAAACCTACAAGAAACGAAAGAAGATTTGGAAGGAGAAAAGCCAGGTAAACAAGATAAATACAGAAATATATTGAAAAAGAAGTTCTGTCAACACTGGAAGAACTTCTGGCCCAGACTCAGTGAAGATGTTTGTAT
CUFF.17396.3	chr18:64523293-64534480	+	tttcaacgtttaggaggagtgggaaatgacacagtcgagtccacagcatttatttttagctggaggatattgctttacagtgttgtattagtctctgcggcaccacgaggtgaagcggttacatgtgtacggacgtcccctcgctcttatcccgccctctaggtcatcagggagcaccaggctgagctccccgtgctGCGTAACGACTTCCCAGTAGTGTCTGTCCACACATGATAACGTAAAAGAACCCTAAATACTCCAATGGAAGACTTGACAATGAATATAGAGAGTTCTCAAAAGAACTACGAAAGGGAGAGGCgggaattctccagcggttcagtggtcaagactctgctgtcccagcacaaggatgagtgcagtccctggtcagggaactaa…
CUFF.17487.1	chr18:65627577-65628734	-	ATGAGGGCCAGGATGAGTCCACGTACCTCCTTCCGGAGAATGAGAGGGAACTGGAAACTTTCATTCATTCAGTTATTAGATCAAAAAGGAGAAAACGTTTTGAAAAGCAGAGATTGAATGCAGCACAAAACTTAATAAAGGAAGTGAAAGTAAAGGATCCTGTACATCCTGTAAAAGCGGGGAGTCCGTGAAAGCAAGTGATGGAGATGCAGGACGTGCTAGCCAGTGTGGAGGAACACCCGCGGGAGGACAGATGGCTGAGGACGTGGGCCTGACTTCCTTCTGGAGAACCTTGTACAGAAGCACCCTGAACGATGACGACTAGACATGAAAGCAGAAAATAAATTCACATGATGCAGCAGTTCCTGCTTCCTAGCTCTCAGAGTTTCATGAATAAAC…
CUFF.17632.1	chr19:9942039-9943638	-	TCAAGGACATTCATGATTAAGGATGACATTTCAAGATTAAAAAGgggaatcccatggtggttaggatttggtgctttcactgctgagggcccaggttcaatcctcagttggggaactaagatcccacaggccatgaggtatggccaaaaTCATAAAAAACTTAAAAAAAAAAAGGTTAAATAAAAGTGTTGAGTTGGGCAGTTAGTTTCTTAtatgacccagtaatccatctcccagatatttacccgcaagaaatgaaaacgtgtccaccaaacacacacgcagacacacatcaccaaaaaaacccttgtatataaattttttacaatacttttattcataacagctcaaacttggacaaaacccaggtgtacatcaatagtgagcggataaacaaat…
CUFF.17635.1	chr19:9944249-9945702	-	AGatagcgcctcaaggtagaaggtattaccatgattccattccatggatgaaaaaactgaaacttcaagatattGCGATGCAACAAGGACTAAAAACAGCTCTTTTTACTGCAAAGCCATCAGATTTCCAGCACATCAAGACACCCTTCTTGAGTGTCTGCAggcaacccactccagtattcttgcctgggaaaccccatggacagaagacagaagaacctggggggctacagtccatggagtcgcaagagtccgacatgacttagtgactCAACAACAAATATATACTTTATTACATAATCTGTATTTTTTGGTACATTTTGTTTGCTCTTCTTCCCCATCCCCCTGAGTCTCTATTTTTGTAGACTGAAAGTGAAACAACTTTAAATTATTCTAATT…
CUFF.17635.2	chr19:9944249-9947957	-	TGTTGCGGTTACGCAGGAGGCACCTAGCAAGCAGCTCCTGCCTAGAAAGGAGACCGCGTCTCTCCGCCGCCAAACAACAGGGGGGGGACTCGCGCCGGGAAAAAGACAGACCCGGGTGGGAGGAAGACCTCCAGGAGGAAGGAGAGGGCTGGGAAGAGGGAGCTCTCAAGACTAGAAGGAAGGACCTTCCCGGGCACCAAGCAGAAAAGGGTCCGTATGTGCGGAAAGATACCACAGTGTGAACACCTTCTGTTGTCGATGACATTAATTTAATAAGTAGTTTGCAGGGGAAGGCATTCAACATCTACAAAGcgcctcaaggtagaaggtattaccatgattccattccatggatgaaaaaactgaaacttcaagatattGCGATGCAACAAGGACTAA…
CUFF.17851.2	chr19:18642179-18650167	+	AGGAGGGGTTTGGGTGGAACAGCTGAGCCAGAGATGGGTCCAAGGAGAGGAATCCCTGGGGTTGAGTTTGTCCAATGAGCAGCGAGGGGGCAGAAGGCGGGGCCTCAGAAATTCTAGAACCAGTGAAGCTGGGTGGAAGATTGGGAAGATGGCACTGAAAGACAGGGGTGTGGGTTTATGGTTGAGGCCTTGCTGTTGGGGTGGGGAGATTAGAAAAAAgttttctgagtattttcctcaatcaaatcttatgtcttagtattttaagaagcacaaaacggtggactaatggtaagaaccctgagaaaccatagaagaaagactaatgaaaGAAAGCAACATAGAGAGCAGATTCTATGGTAACAAAGATGACAGATTAAGACCGACAAAAGAAGGGGA…
CUFF.17851.1	chr19:18642179-18661825	+	AGGAGGGGTTTGGGTGGAACAGCTGAGCCAGAGATGGGTCCAAGGAGAGGAATCCCTGGGGTTGAGTTTGTCCAATGAGCAGCGAGGGGGCAGAAGGCGGGGCCTCAGAAATTCTAGAACCAGTGAAGCTGGGTGGAAGATTGGGAAGATGGCACTGAAAGACAGGGGTGTGGGTTTATGGTTGAGGCCTTGCTGTTGGGGTGGGGAGATTAGAAAAAAgttttctgagtattttcctcaatcaaatcttatgtcttagtattttaagaagcacaaaacggtggactaatggtaagaaccctgagaaaccatagaagaaagactaatgaaaGAAAGCAACATAGAGAGCAGATTCTATGGTAACAAAGATGACAGATTAAGACCGACAAAAGAAGGGGA…
CUFF.17877.1	chr19:18905107-18906083	+	GGAGGGGGCTTTCTGTCTCACCCGCACACCTGCTCCTCTGTGGCAAATGGCCTTAAGCAATGACAACAATGCAGGCTTGGTGAACCAGGACACCAAATATGAGTGTCCAACGTGCTTACTTCTGCACTAGACCCAAAGACTACTTTTTCAGTGGACTCCAAACCCGAACTTGAAGTGCCCCACCCCAGACCCCACGTCGGTA
CUFF.17960.1	chr19:20938016-20939407	-	TGGCAGGGAGTTTATCTATTTGGAGCTGTCTGTCATTGATCTGAATACGCTTCTAAAATAGCCCAAATACCTGGTGAGGGCAAGATCACCAGCAACCCCGGCTCAATATTAATTATAATAATGAACAGGCGTGAGGAGGGTGGCTTCATTGCCTGCCTTGCAGGGCTGGCCTCTGTGAAGTTTGGTGTTTAATATTCATTGTGGGTCAACCTGTACCAAGAGCTGGTGGACGCTCCTAAACTGAGAGAAGTCTACCTgggtggtgatgccgttctccgcttccgtgggacagagaaggaactgctactgctgacacagacaacatttaggttagacctcaagaaggacttATTCAGGACCAAAAGTAGATGGATAGAACAAATCATTcacttattagcc…
CUFF.17975.1	chr19:21110518-21111461	+	AGGGGGATCATCTTTTTTAGTATGAGGGGGCGGGGTAGGAACAGCCGTGAAACAAGCATGGAACATCCACCCCAAACAGAGGGGATTGCCCCAGCAGGAGGACCAACCCCGTAAAGGCCCCCAGCACCAGGAGCTGTGCCTCTAGGAAGTGAGAAGACCCCAGGAGCTCCAGTCTGGATCCCTGAAATCTCAAGCTTTAAGGAAGGAATTGAACAAGAGCTCCAGTTCCATCTGTGCCTGACGCCCAGGCGTGCCACTTGCTGCCTGACAAGGACAAGAAGAACAAACTGGCAGAGAAAAGGACACGGAGGAGGAAAGGATGGACGCAGCAACTCTCCAAGTTTCTCCCCAACACAACCGCGAATTAACCAAGACAGTCTGCACGCTTAAATGCTACAA…
CUFF.18016.1	chr19:22207933-22208908	+	taggtgggattaataacagctacctcagagctgATCTGTGCCTGAGACAGCACTTGAAACACCATTGGACGGTAATGGCGGTCGTGTACTCTGTCTTGCCAGTGCTTCCTTGAGGGAGGAGGCAAATAAATTAGCTCTTAGATGCAGAACTAAATTCTTTTACTTAGTTTATTATTAAttttctttaatggccctgccgcgaggtatgcaggagcttagttccccagtcaacagtcccttcaggagaagtggagagtcttaaccactggaccaccagggaagtcccTAAATTCTTTTTCTTCAAAGGCGTTCCTTTGGGCTATATCAAAGAGTTTATTGTCTTTCAAATATGACTGCCTCAAAAAAGAAATGTTTTACTCCTGGAATCAAAGAAACTTT…
CUFF.18188.1	chr19:25524748-25526039	-	GACCGGGGTTGGTATTGTTATTACTAAGAGGCGCTCGGTTTCGAAATCGCTTTGAATTTTCTGGCACCAAATCTTGGCGGTTCCCGTGCCTGGAAGCCTCGGCCGCGTGGGTGTTTTTTCGTCCCTGTGACTTGCGGAGTGGAAACCCACTCCTGCTTTCCTGCTCGGGAAGACGGTGGTTTGAGACGGGAAACCAGGACTGTGTCGCTTCAGAAAGCCGGGAGCAAGACACGCCCCAGAGCTGGTTTAACCTGCTGTAACTAGACTGGCTGAATTAACTATCCCTCAACTGGACACATGACCACTCATTCCTATGGAGGACTTTCATCTGACAAACATTTTCTCCTCTCCTTTGTCCATCCCACTGGGAAGCATCAACTGGCTACTCCTCCTCCATCC…
CUFF.18208.1	chr19:26557762-26558311	+	TCCTCTGTTATGGGAACAGCCCACAGCACACCAGCCCAGCAGACAGATGTCCTGGGAATAAGCAGACTGGTAATTTGCACAGCTCTGTCCTCTCATTCCAAACAGCATCCCGGAAGCTTCCCTGAACTATGattcacttgccacggaacagctgggcccgtgcaccacagctattgagcccgtgctctggagcctgagagccgcaactactgaagcccgtgtgccctagagcccgttccccacaaccagagacgccactgccatgaaaggaccgaacaccacaaccagagagcagccctcgcttgtcccagctggaaaaagcctgtgagcagcaacaaagaaccagct
CUFF.18340.1	chr19:28223511-28224322	+	GCGAGGCGGAGCTGCGGAAGTTTGCGCATTCTGGGTGTGAGAACGTAAGAGCTCAGTGGACTATGAGAGCCTGGCCCAGAAGTTGAACTGCAGCTTTCAGCGCTCCAGAGGAACTGCAGTGGTGCGCCTGCCCCGCAGTAGGTCTTCCATCCCCACCTTCTCCTCGCTGCACCCGCCTTTTCCACTGTTCCCAGGAGCTGTGGAAAGAAATCCATTTGTCCTCTCCCATGGCCTCTGGAACTGTTGGAAACCTTTCCTTTAACCAGAAAGGCTCCATACCCTCATTCAACAAGAATCCTTCGCTAGGAGTCTTCCTCTTTTC
CUFF.18367.1	chr19:28435825-28436637	+	GAGAGGCGTGTTGCGGGAATGAAGTGGACAAACGGTATCAGAAAAGGGAGTGGAGGAAGAGAATGAAACCCCGCGTCCCTGGGAGGCAAGAGTCGAGGGCGGAAATTCAGACTCTACGATTTCCTTATCTCTTAGAGGTGTGGCCAGCTATAGTCTAAGCATCTCTCACGATTGGGACCTCACGGACCTTCGGACCTTAAAGGTGATTTCCTGCAGAACGGAAAGTTCTCGCCGGAGTTCATGGCTAACAgaccagatgattaatatacagcaggtcagcatggccttggcacctggaaagcatctcttatcatcacatcaaaggtgtcccaggaagaggggcatttaatctttatttttaacatgggcattttttacttctggtcagcgtaccctttc…
CUFF.18490.1	chr19:31857023-31858318	-	attgaggctgaccgagtctaagtgacgtgcctaagattttgcaaatagttaagggacggaggcaagatctaaacctgtgggaatccaacatcggaacccttgtcacgaccccaGAAGTGTGGAAAGAGGATGCCATGAACGACGGACCTGTCACCCGAGACGCCACTGTCCTGGTTTAAGTGCGCTTCTCCTCACATGCACGTTTCTAGCAAAGGACCGGCCACCTGAGTAAAATCCTGGCGATTAGGAAGGCACGACTACAAGCTTCCAGCTAAATATTTAACATGGAAAACCTCAATTT
CUFF.18586.1	chr19:35266111-35274566	-	CCGGAGGCGCTGAGCGAGattctttttcgtcctggtttatcacaagacattgaatgcagttccctgtgttctacaggaggacctttgtttatccatcctatatgtgatagtttgcatcagctgatcccgaactgcccatccattccacccttaccttttggcaactacaagcctgttctctgggatcttcccgaccagggatggaacccacatctctcgtgtctccttcattagcagATGCTCTCACCACGTCCAGCTGCTCCTGTGTATCGGAAAACCCGCTGTAACACGGCTTGGCGACATTAAAAGATGCGGCAGCTGGACTGATTAAACAGGGAGGGGGCGCTGGTCAGAGCACAGTCTTTTTAAATAATGTTTCTGGTAATGCATTTTGGGGGA…
CUFF.18695.1	chr19:38400630-38401510	+	TGTTGTGTAGGTAAAATGAGTTTCTGGTTACTGTGGATATGAATCACCACAAGAGTCAGACTGGATTTCTGCCATTTCTTCCTCTTACTCCCAGGAAATGATTTGTCTCTTCCTACAGTGTCTACGATGCCTGCAGAAGCAACTGAAAGTTTTATTTCCTCATCTAGAGAGCCTGGTCTTATGACTACCTCCCTTTAGCACTACGGAAGCTAACAGCCTTGCTTTTTGTCCCGCCCCCCAGTTAGCTTACAGTCCTGGAGAACCACGACTTCCGGGAGTTATGGGTGCTGCCCCAGGACACGTCCTAGCTGCCCCACCAGTGGCGTTCTTATGGGTCCCTCACACAGCACTGCCATCCAGGACACTCCCAAGGATAGAGCAACATGAAGGGAGGAGTGT…
CUFF.18707.1	chr19:38653178-38655216	+	GAGAAGGGACAGCTCCAGCTGCGGCTGCACAGAGCCCGgacatgcatgtaccctcaaagccgtttggatcaagcagacaaagaccacaatggaaaagcaagatggtggggatggtggaaaagcaagaatgaaggaacctgggtccttgaatgacagcatgaaggagagcttcttgccaacttggaacttagactgttctgagagagaaaaGAATCCAGAAATTTCCTGATCCATCCTATTATGCCTGGGTCAAAGTGCCAAAGAAGACACTTGAGGAGGTTCCACTGTTCCTGTTGTTTCTGAAGGCTGGGTCTGCATCTAGGTGGGCGTCATCTTCTGGTAATAACTTTATTAAAGAACTCCTGATC
CUFF.18783.1	chr19:40133525-40134996	+	GGAGGGGGAGGGGGAAAGGAGGGCTAAGCTGTAGAGGGAAGGGGGAGCCATTTCTCTCCACTGGCTGCAGTCTCCGTGCTCACATTTCCCCGGAATCCAGAGGCGTCCTCGGCCAAGGACTCCACAATGCTGGATATTTTCATCCTGATGTTCTTTGCCATCATAGGCCTGGTCATTCTGTCCTACATTATCTATCTGCTCTAGGGACCCGAAACGGCGGCGTGGAGCCCACAGCTCAGGGGGGAAGGATGAAGCTGACTGGCCGAGCATCCTGCTTGCTGACGCACCGCTCCTGGATTCCAGTCCAACAAGAGGCCTCTTATCGACAGTAATCCTGCTGCCCAGCAGACCTCTTCTAAAGCTTTCCGGATATGGTTAACCCCTGTCAAGCAAGGGGCT…
CUFF.18786.1	chr19:40208879-40209583	-	GGTGAGGGCTGAATGCTGGGTCTTTAGAAAAGACACCAGAAAAGGCTCCTCTACAAAATGGATGGGGCTGCCTTGCCAGCCGGAGCCTGAAAATGTGCCCAGGTGTACAGAACCCCAAGTCCCTGGACAACCTGTGAAATGCTAGCTGCCTGTGAACAGATGAAAGGGAGGACAGGCAACTGTCCTGGAAAGAAGGATCTGCAGACGGGACCTCCCTCAACTTTGACCATGTACATCTCAGGGTCTGCTTTCCCGGTCTGACCCCTCCCAGTGACAGCAGAGCTGTGAACCCAGGAACACTGACAGCCAAGAAAAGTGGCATCATCAAACCCCTCCCACCGCCTCTTCTCTCCTCTCATGGCCATTTTCAACATCAAAGAATAATAAACTACTACACTG…
CUFF.18904.1	chr19:43358325-43360237	-	GGGGACGTCCAGGTGTCTGGAATCACCGGCGCTCTGCTTTATAGgggtgatttgattgtttccacttatttgctgttacatcaaatgcCTACAGGAGTTACCACTTGTGAACCTGAAGAAAAATATCTTTACCAagagcttgtgcagcttcaactttgccaggtttggcatattttttcctagatggttgtaccaacttatacttttaaccagcaatagcattcttatttccctatactcagttccacacttgggttatcagatcttcatttttgtcagctccaggtaactcatagctgtaacttccagttaggatcacaatcaaagctgattcaattttctcttgttactgacccccgggaattgcctgtttatttcctttgctcccccctctttttt…
CUFF.19031.1	chr19:46022526-46025565	-	GGAGTGGGTGGGGGAGGCAGCAGGACATCTGACAGATGGGGAAACTGAGGTAGGGCTTAGGGCAAGTGCTCGAAAGGGGAAATGGCTCCCAGGATGGTGGAGAGAGCTCAGCTGTTCTTATTTTCCCTATCTCTGCCCTCGACTTCTGCTGAGCATTTTCACCGAAGCTGAGAAGCAGAGGAGAAGAAAGACAAGTTCCTCCACCAGGCGCTAACTGAGACTGACAAGAAGAATTATAGAAATCAGTGCCGCTGCCACTTCTTCCTGTCCCAACTCTTCCACTACCTGGCTGCAAGGCCCTGGAACATCTTTTCCTTTCATGAACCTCTATCTGATGACCCTCCTTGTCTCTTGGCCTTCTGGTCTACCTTCTGGAGGCTTGGGCCTGAACGGAACGAA…
CUFF.19031.2	chr19:46024776-46025565	-	GGAGTGGGTGGGGGAGGCAGCAGGACATCTGACAGATGGGGAAACTGAGGTAGGGCTTAGGGCAAGTGCTCGAAAGGGGAAATGGCTCCCAGGATGGTGGAGAGAGCTCAGCTGTTCTTATTTTCCCTATCTCTGCCCTCGACTTCTGCTGAGCATTTTCACCGAAGCTGAGAAGCAGAGGAGAAGAAAGACAAGTTCCTCCACCAGGCGCTAACTGAGACTGACAAGAAGAATTATAGAAATCAGTGCCGCTGCCACTTCTTCCTGTCCCAACTCTTCCACTACCTGGCTGCAAGGCCCTGGAACATCTTTTCCTTTCATGAACCTCTATCTGATGACCCTCCTTGTCTCTTGGCCTTCTGGTCTACCTTCTGGAGGCTTGGGCCTGAACGCCTCGGC…
CUFF.19031.3	chr19:46024776-46025565	-	GGAGTGGGTGGGGGAGGCAGCAGGACATCTGACAGATGGGGAAACTGAGGTAGGGCTTAGGGCAAGTGCTCGAAAGGGGAAATGGCTCCCAGGATGGTGGAGAGAGCTCAGCTGTTCTTATTTTCCCTATCTCTGCCCTCGACTTCTGCTGAGCATTTTCACCGAAGCTGAGAAGCAGAGAAGGAGAAGAAAGACAAGTTCCTCCACCAGGCGCTAACTGAGACTGACAAGAAGAATTATAGAAATCAGTGCCGCTGCCACTTCTTCCTGTCCCAACTCTTCCACTACCTGGCTGCAAGGCCCTGGAACATCTTTTCCTTTCATGAACCTCTATCTGATGACCCTCCTTGTCTCTTGGCCTTCTGGTCTACCTTCTGGAGGCTTGGGCCTGAACGCCTC…
CUFF.19097.1	chr19:47549054-47555223	+	TTGTCACTGAAGAAGGAGCTGAGAGAGGATGTGCCTGAAGGTGGAAAAGCCAATACTGTTTTGGATAAGCAGGTCTGTGTTCCATGAATACAGGAAGAATTAAGAGTAAGGAAGAAAGAAATGCAGAAACATCACCTGAATACTTGCCTACCCCCTGGAAAAGTTCAAGGCTCTTGCTCATTTTATGAATTTTCCCCAAGCCACTGGTTCTCATACATCTTCAGACATCTGATCAAGGAAGCATCAGAGGAAAATAAAAAGTTGGGTATCTGCGTAGAAGTCAGTGTCCCGGCTCAG
CUFF.19097.2	chr19:47549077-47555223	+	AGAGGATGTGCCTGAAGGTGGAAAAGCCAATACTGTTTTGGATAAGGTCTGTGTTCCATGAATACAGGAAGAATTAAGAGTAAGGAAGAAAGAAATGCAGAAACATCACCTGAATACTTGCCTACCCCCTGGAAAAGTTCAAGGCTCTTGCTCATTTTATGAATTTTCCCCAAGCCACTGGTTCTCATACATCTTCAGACATCTGATCAAGGAAGCATCAGAGGAAAATAAAAAGTTGGGTATCTGCGTAGAAGTCAGTGTCCCGGCTCAG
CUFF.19087.1	chr19:47921298-48000089	-	gtgaggtcaggagggtgggatctatgaggggagtcagtgtctgatcagaagagatagcagtgagctTATGCACTCACTCTGCCTTGAGTAGCCAGCTAGTTGggtcgtctgcaaaccaggaagcaaaccccaccatgtcagctccctgatttcagacttgaagccgccacaacctttctgtgggtcaggaatccaagagcatctcaacagggggcctcagacttgggggtctctcacaggctaccatcaaggtatcagaggggctgcagttgtctccaggctccacaagaggaagatcactcatgtgatgAGAATTCAGCTAGAAGACACTTAACGATGAAGAAGAGTGGGTGTAGTAACTCCCAGGCATGACGGAGAAGCTGAAtgtagcagatgcgc…
CUFF.19151.1	chr19:49608769-49612072	+	TGCATGATGTAGACGTCCTCGGCACAGGGATCCGGCTGGTGACTCTCCTGGTGGACCGAGACGGGCTGTACAAGATGAACCGCCTGTACATCACTCCGGACGGGTTTTTCTTCCGAGTCCACATACTAGCCCTAGACTCCTCTAGTTGCAATAAGCCATGTCCAGAGTTTAAGCCAGGCAGCAGGTATATTGTGATGGGCCACATCTACCATAAGAGAAGGCAGCTCCCTACAGCTCTGCTTCAGATCCTGAGAGGGCGCCTTCGCCCAGGAGATGGACTACTCAGGAGCAGCAGCAGCTACGTGAAAAGATTTAACCGAAAAGGGATGGGCAAGTGCAAGGGGCAATTCACGCCCAGTGCATCTGAAACACACCAGCTGGGCATTTCTGGATCTGAAA…
CUFF.19307.1	chr19:54171927-54172351	+	TGGGCGGCAGGGGTGGAGGGCAATGCATCTCTCCATCTCAAGAAACTCCTAGACCTCCTCTGGAGAGCGGACGGCTGGGGTGGGGCGGGGTGGGGGCTGAAGAGATGCGACAGCACATCTGCTGCTCAGGCTGCTGCTGTTCCGAGGTGGTGTTCTTGGGGTAGATTCCTCCTTTTATTTTACTACTTGATATAAAACGTTTATTTTTGACCAGGCCTGTGGCTTCCATTAGCAATATGTCTCCTTTCCCTAATATACAAATACCGGCTTTGTTTGCTCAATTTTGTGAGTGCTTTTGAATTGAAGATGATTGTGTAACTGGAGACGATCACTATCCCTTTTTTTTATCCCGCTC
CUFF.19337.1	chr19:54784880-54786238	+	GAGGGTGCTGCAACTTCGCATTAGAACGCTCAGCCGTGAGCGTGGTGGAAGCAGGCCAGCTTTCCGCTTTGTGCAGTGGAGGCTCCGCGGTGCTACTTGAAAGTTGTTCGTGTTGGAGGCCATTCCCTGTCTACGTGTCCCCATCTTGAAGAGCAGATAATGACACGCTACTTTCGCAGTGCAATTTTGTTACCGCAAGAGTCTTGCTTTGAAACGTCCGTGGATGAAAGAGACAACAAATTCCCCGCTCTCCTTTCCCTTCGGGGTCCCGTGAGCTAGGCGCACTCCTTTCTTCTTACTGCCATATTTTAAGCTCCCCGGTAGTCAGAGTCACAAACCGCGCTCTAAAATCGTCTTCAAATGTCTGTACTGGGTACTTCCCCTGCTGAAAACCCACAT…
CUFF.19337.2	chr19:54784916-54786238	+	TGAGTGAAGCGTGGTGGAAGCAGGCCAGCTTTCCGCTTTGTGCAGTGGAGGCTCCGCGGTGCTACTTGAAAGTTGTTCGTGTTGGAGGCCATTCCCTGTCTACGTGTCCCCATCTTGAAGAGCAGATAATGACACGCTACTTTCGCAGTGCAATTTTGTTACCGCAAGAGTCTTGCTTTGAAACGTCCGTGGATGAAAGAGACAACAAATTCCCCGCTCTCCTTTCCCTTCGGGGTCCCGTGAGCTAGGCGCACTCCTTTCTTCTTACTGCCATATTTTAAGCTCCCCGGTAGTCAGAGTCACAAACCGCGCTCTAAAATCGTCTTCAAATGTCTGTACTGGGTACTTCCCCTGCTGAAAACCCACATCACTTAGAAGACTCTGATGTCAGCCCGAGTT…
CUFF.19338.1	chr19:54816063-54816717	-	TTGTGTGTTTCCTGATGACTGATGTGATATATTCTTGGCTTTCTGAGCAAGAAAAGTCATCAGGGTTTCATTTGTTATGTTTATGCCAATAGAAATAAATCTCAGCAGTGGTGGAGGAGATGTTCACACTACACTCGCTGTCTGGGGAAGCCTGCTGGTTGAATCCCTGGCGGGCGGGCAGAACTGATTCAGGGACTGCCTGATCATGACCAAGTGGCAAAGCCTTGTTTAAAAGGTCAAATTTGAAAGAAAAAGAGGATGGTCTGGAAGAAGCAGAAGGCACCCTGTTCAGCCCTGCAACCTTGGATCTGCCGCCTTGCTAGAAAGCCCATGGGTCACGTGAGCAGAATCTGTCAGCATGCCTCCTCTCCGGCTAAAAACGAGGAACCGAAACTTCTT…
CUFF.19375.1	chr19:56107803-56109537	-	GAATCGGGAGAAGCAGGTGCGGTGTCTGGAGTGGTACGGGCTGAGTTCAATCTGGGCCACGCTGAGTTTCCAGGACCTGGGAGCCATCAGGCTTTAAGAAGCTACATCTTgggacgtccccggtccaagggttaagaatccacctgccaatgtagaggatgttggtttgatcgctggtccgggaagattccacatgccaagaacaacgaagcccaagagccccaactactgagctcaagtgcccagagcccatgttttgcaacgagagaagtcagtgcacctagagagcagccccagctcgccgcaactggagaaaagccctcgcaaagcaatgaagacccagtgcagccaacaataaattcaattaaaaaaaATCTAAACCTTATTTTTAAAAAGACG…
CUFF.19449.1	chr19:58059302-58064080	+	GTGCCCGGCATTAGAGAGAGCCTGAAGGATGCAGGGAGATCTTCCTGGGTAGGGGATTTTGTCAACAAAGTCTCCGGGATGGGAGcttggacctcgtgttgaactccagactcatatatccaactgcctactcgatagctctacttacacgtctaattggctgtggcagccgtgggaatgctccactcacaccattaatgggaacagggtgaccatactgcatttgggaatctcctcttcagcccctgcttcctcccctccatccttcacagccatttcccctgaaagtctcttgcccacccgatcctgtcttggcgtctgctctttggaggatccaaggcaacagattagcatctcaaacgtcaaatgttctaaaccaaattaaccagctctctctcc…
CUFF.19449.2	chr19:58062771-58064080	+	gatgaggcgtgtctagagggaggTCAAGTGGATCAGGACTTAGAAGAACGGCCAGAGAGTCTGTGAGTTTCCTATGTCTCACCAGAGCATCGATCCAGTGGATTCTTAAAGAGgaccccacaggctgcgtttccctcctgcttccctggtgccgtcgcgggcccctctgcctcccctgacgtttaagtgcagcttggacctcgtgttgaactccagactcatatatccaactgcctactcgatagctctacttacacgtctaattggctgtggcagccgtgggaatgctccactcacaccattaatgggaacagggtgaccatactgcatttgggaatctcctcttcagcccctgcttcctcccctccatccttcacagccatttcccctgaaagtctc…
CUFF.19539.1	chr19:62902087-62903598	-	GGGCGTCTGTCCTACAGGATGAGCTGACTGCCTACCAAAGCAGAAGGTGACCGTGTGGAGGCCCCCCGCGTCACCCCGGAGACGGCGGTGGATCCAGCCGTCCCAGCTGCACCACAGATTTCTTCCAGCAGGTTTGAAGATTCGGATATTATTTCAGTAAACTGTGAGACCAGTGGCATTTTTTGACACTTAAATGTAATTAAGATCATAAAACGTCCATCACTCATACGGCAATGGCTGCTTTTGTGTGTCTGCCTTTTTTTTTTAATGTTCCTTTGTTTCCACTTTCCATATTTGTGTGCATTTGAGTGCGTCCTGAGAACTGCTGGTTTGGGAGAAAGAAATGAACCGTCGCAATGCCTCATGGATGCCTTTGCATAGAATTTACCAGTTGCCACT…
CUFF.19590.1	chr2:966676-973515	-	GGGGCGGAGTTTGGCCTTCTCCGGGTTCCTACTCAGTCCCAGGAATTCTAAGTCAGGATCAAGCAGGCATCAAAGAAGAGTGATGGGCAGAGCTCTGCAGATTGCTCTTCTGCGTTAGTTGAGAAGCTCAGAAAAGAGAGGTATCATCTCCCAATAAGAATTAGGCAGCCCGACAGTAGCCTGTGACCAACAAACACCTCAGTCTCCGTGGACTCATCCACGCCTACAGACGGTGCATCTCAAGCACTTTACAGATGTCTAGGAACTGGCCTCTAGAAGTGAGCACAGTATTTACAAAGAGCTGAGAGGTCAATGAAGAAGGAAGATGAGAGGTGACTGCCTACTTTAATAGTACTTTCTTCTATCAGATGAGAAACCCAAAGAAAAACCCAAAGATCA…
CUFF.19753.1	chr2:15463927-15464650	+	GAGCAGTAAAGGGGTATAAGTATCAAACAGCTGGATTCTCTCCTTTGCTTATGAACTTAAGGCAGAATGATCAAGCAGGATGAGAATGGCAAAGTAACAAATGTGATGACCTGGACTCTTCATGGTATAGAAATTCACTGGAGGAGCCTCTACAAAATCCAAGACACCAAGGTCCCTCCAGGAACCACGATATTCAATCTTCATTGCCAAGTTACAACCAAAGATAGTTTGTGAAAGAAAAGATTAAGTTCAAAAGGAATCTACTGATCTACCCATCCATTCATCCATTCTCACAGGGGAAGAATCTACTGATTAATCGTCATTTATATAAATTTAGGCCTGAGAGAATAATGAATATTGACTGAAACAGAATTCTACAATTTAGAGACAGCATAGAAA…
CUFF.19779.1	chr2:17468338-17476686	+	GCGGGGCCAGCAGAGTTCTCGTGAGGTGACGGAGCTCTCGAGAAACAGGCACAGCTGTGCAGTTGGGTCTAGGTCTCGGCAGAGGGCACGCCACAACATCTTGAATTGAGGGTCAGTGTTTCCTTCTGCATGGTCTGAAATACCTACCGTGGCTGTTTTGATGAACAAGGTATAAGTCACTCTTTGGAGCCATAAGAGAAGAACTACTTCTAGAAGTTACAAATATCGCACACACACTgtcaacctcatctggtgagttgaaggccttaatagaacaaagactgacctccctcaccaagaaggaattctgtcaaaacactgcctttggactcagattgcagctttttcctggcctccagcctgccagattaaagatatgggacttaccaaagaccaaaa…
CUFF.19779.2	chr2:17468338-17476686	+	GCGGGGCCAGCAGAGTTCTCGTGAGGTGACGGAGCTCTCGAGAAACAGGCACAGCTGTGCAGTTGGGTCTAGGTCTCGGCAGAGGGCACGCCACAACATCTTGAATTGAGGGTCAGTGTTTCCTTCTGCATGGTCTGAAATACCTACCGTGGCTGTTTTGATGAACAAGGTATAAGTCACTCTTTGGAGCCATAAGAGAAGAACTACTTCTAGAAGTTACAAATATCGCACACACACTtaggtcaacctcatctggtgagttgaaggccttaatagaacaaagactgacctccctcaccaagaaggaattctgtcaaaacactgcctttggactcagattgcagctttttcctggcctccagcctgccagattaaagatatgggacttaccaaagacca…
CUFF.19871.1	chr2:18699855-18757446	+	tagggggcaaggttgtaagcaggggggaaagctgtgccatcatccaagtgaacgataaagtggatcaggccagaagATTTGAAAGTGATCGTAATCTCCACCCAGTGCTTCCTGTGTTCCTCCTACATTCAGCTGGGCTTGCCTTGTTCCCTGTATCTTCAACCACTCGGAGGCCTTGGACTTACGGGTGCACAGCCTGAGAATCTGTATGCACAGAAGGGATCAACTGCAAGAGACAGGAGAGTGGCAACAAGGCTAAATGACTGAGAGGATTAAGATTAAATGCACATGGAAGCCAAAGTAAGGATTATTCGCTAAGGCATGCAATTGGGAGAGAAAACGCAAGACTCAAGTCACACTGTAAAACCAATGAAGTGTTTGGCAGGCAGAGAACTATTA…
CUFF.19922.1	chr2:20770625-20772192	+	ATGGCATCGTTGCTGCCCCAAGGGGTTAGCAGACGCGGGTGAAAGAGATATTATTCTTCCATATAAAATGACCCCAACTAGATATAGGAACCATTCAAGAGACTTAcccctggaggaggaaatggcaacccactccaatattcttgcctgggaaatcccatggacagaggagtctgcgaggctacagtccatagagtagcagagtcatgactgagcgaTGAGCAGGAAGAAGAGATTTTACCACAAGATCTGGGACAAGAAGACTTCTGTAATATCTCCCACCATGCTGATCTTCTGGGAACCCTTCACCTGCTTCTGCTACTGCAAATGACTGGACATCCATTAACCTTGGTTCTTCGTGTGTGGAAACCTTTTGTTTACAGTGCTTCAGAACGCTGG…
CUFF.19970.1	chr2:22103349-22107563	+	GACCAGTCGATTTGAGCTCAGCTACTTTAGTCACAAGGTTATTTCCAAACAGGACTTCTATTACTAGGAGCGAGGTGCAGGGAGCTTAGCAGCCTCTTCCAGCTTCCAATCCACCTTGCAATGATTAACAATCACCATCGTCCCATCCTAATAACAATTCCAAAACTAGAGAAATCAGGCTATAGACGATTCAGTCCTTATTCCTGGGAATGGATCACACAAGACAGGAAGTTGAAGCTTGGACCAGGGTCAAGGGCCGGAA
CUFF.20017.1	chr2:24218323-24219117	+	tagggagcgcttaacgcgggcccggtacttggggactggagttgtatagattgtcctcggtcctcaagACCTAACGTCAAAAACGATAACAGCACAGATTTTAAGAGGGCTGTGCAATTGCaaacgcacagctattatctcatttcatgctcctaacaatcctatgagccttgatctgtaaaggggtccatggccttcagcagtctgcggaaagTGTTAGCTCAAAGATTCCTTGGAATGCCTGCCTTGATCTTACATCCCTAT
CUFF.20052.1	chr2:25559463-25559855	+	GGGTGGACTGGGAGGCAGGAGGCCCGGGCAGCACAGCACTTCTCTGGGCTTGAGTCTCTTTGTGGATAAGACGAAGTCTTAGTTTTCCCCTAGGCGGTGCAGCTCTGGGGGAGTTGGGGACCCTTTCCTCAGAGATGCCACCCACACCTTTCTCTCCTGCTCAGAGGGCAGCAACCAGCAGTTCCATCCCAATTTTTCGTTTTTAACTCTATGTTCCGCATATTTCATTTTTAAAAAGCTTGCTAAAAGGCCCTTTCTGCAGCCCCACCCGCACCTG
CUFF.20063.2	chr2:25738035-25757047	-	agagacgcagccaggtagtgagtgagctgagagaacgaggtgaaagctgcaagccttttctgacctgccttggaagtcacgtctgctggttcagGCCACCCTCTTCTTCCTTTCGGAAAGAATTTGGAGACACGCAATTAGAATATGGATTGGCGAGCATGAAAACAAACAGGAAGTTGGTTGATGTCAAGTGATAATCTCATACAGacagtttaccgactgagctatgagggaagcGTCGGACAGTGTATGCACTCCGTAGGACCCCGACCCCGTGGCTCCCTGGCACGTGGGCTGCCCAAGTTCCTAGACTCCTGGATcccgctccgccccct
CUFF.20135.1	chr2:28364696-28381874	-	GTCAGCTGCACGGAGAGGAGAGGCAGAGCAAGGGGCCAAAGCTCCAAGCCTCTCCTCCCCAGTGACGGCCAATTGGTCTTTAACAGTTAAGCCAAGAGAAAGAAAGAAACCACGAGTCTCCCAGGGAACTGGTCTTTGCAGACGCCATCATTCTGCTTACTCACGGCGGGGCGCCATTCTTGAGgtcagaagtcctacccaggtctcactggtctaaaatcaaggtgttggcaggtctgggttccttccagaaattctagagaagactccattccttctcattttccagcttctggaggcctccccatcccttggattgtggccccttcctccatcttcaaagccagcaacagcagCCCCAAGAGAGAACTCTCCCT
CUFF.20144.1	chr2:28958933-29056721	-	agctggtgaggaagaaactctgctctaaacaggccttcaggagcctagcgtcctggttctaccctcctgcacagccctggaacgtcgtgaactggcagacagagaggtgaattttttgctgtcttttagtgctgaggagacaaagattcataggaaattccaaggagaatcatgaaggactatcttgtaagaagaaaggaaaccaaagtggagcctgagtcttagcaaagtagctgccctcccctgcatgactgtgtttaaagttaatagcatcactctaccccaccccactgt
CUFF.20172.1	chr2:30193778-30228474	+	caccatttactattacctaaaattcttatgatttttatccattggttgacttgtctcctctcagctgataaacagacctatgtgaggtagacacactctttatttttgccttctctaaccctagaaggtctgacctccaacagaggctcagtgaggattagttcaatgGGTTATTCTGAGGCCTGAACTCCATCAGTTTGGCTTGAAAAGGAAAAGCTCCAATGGACTCCTATTACGCAAAGGTAGAAGAGAAAGGACACTATCACATCTGCAAGTGCAAAAGATCATCAATCATGCCACCAACACCAGGAGAGGTCCCCCACCCCGCCATTAAATCCTCTCCATTCTCTAATCTCAATAAATAATAACTGGCAGAAGATGATATATTTTCAAAAGACG…
CUFF.20173.1	chr2:30207417-30209448	+	tcgtgggaggatggagTTTTTGAGTACAGCTTACGGGGACTGTGAAGGAGAGAAGCTTGGCACATACCCAGGAGGTGCTACTCAAAAGGCCAGTCTTCTATCAGGGGAGGAACCAGTTATAAGGCCATTACCAAGAAGACACTTTACAATCAATATTGGAGAAAGGAGGCAGTTTTCAACCTTTTGAAAATGTTTCCGAGTCTACAGAAAGAACCCAGTTGACCCAACCTGTCCTCTTGACTGACAGAGAGCAAACATCTTGACTGCACAAAAATATGAGGAGAGGTTATTTGCCCAAAGTGAATCCTGGTATTCTTACCAAAAGAAGAAGAATGGAAACTAGCCATCCAAATAAAGAATAGCtggt
CUFF.20214.2	chr2:32912665-33033497	+	TCGCGATGTTCCCGTTGGGCTGAAGACTTCTCTAAGGTTGTGAATCCCCTGAAAATAGAGCTCACACACAAAATGTGTTTATTGAATGGAATGGATGATGAGTGAAAGCAGATAATTGCTGGTGATGGAGAGGACGGACCGGAGAAGGAGACAGCCTGAGGAAGTGGCACCTGGTGAAGTTTGCAGATTTCCAGCCACTGTGAGGATGGTAAACGACATTCAGCTCATGCTGAGTGGCTGCCTGGAGTCTTGTGCTGAGGATTGTGAAGCAGGTTCCAGGGAGTGCAATGAACTCTGAACACTGGCTTTCACTGGTGAGCACGGGCTAAGTGGGGCTCACCTACCACTTGTTTGTCATCCTTAACCTCCCACGGTGTCAGTTTGTGGAAAATGCACTAG…
CUFF.20214.1	chr2:32912665-33131844	+	TCGCGATGTTCCCGTTGGGCTGAAGACTTCTCTAAGGTTGTGAATCCCCTGAAAATAGAGCTCACACACAAAATGTGTTTATTGAATGGAATGGATGATGAGTGAAAGCAGATAATTGCTGGTGATGGAGAGGACGGACCGGAGAAGGAGACAGCCTGAGGAAGTGGCACCTGGTGAAGTTTGGGACTGTGTTATAAAAGAAGTTATGAAGAAAACAGTGAATGAGTTTGGCATATGAAGAGGTAATTAAAATATTAGAGAGTaaacattgaaggcaggagaaacggggacaataaaggacgagatggctggatggcatcaccaactcaacagacgtgattctgagcaagctttgagagttggtgatggacagggaagcctggcatgctgcagtccatg…
CUFF.20214.3	chr2:32928468-33033497	+	gtgagagttggactataaagaaagctgagcaccgaagaactgatgcttttgaactgtggtgttggagaagactcttgagagtcccttggacagcaaggagatccaaccagtccatcctaaaggaaatcagtcccgaatgttcattggaaggactgatgctgaagctgaaactccgatactttggtcatctgatacgaagaactgactcatttgaaaagaccctgatgctgggaaagattgaaggcaggatgagaaggggatgacagaggatgagatggttggatggcatcactgaatcgatagacatgagtttagGTTGTGAATCCCCTGAAAATAGAGCTCACACACAAAATGTGTTTATTGAATGGAATGGATGATGAGTGAAAGCAGATAATTGCT…
CUFF.20257.4	chr2:37684350-37704669	-	ATGAGGCAGGCTCAAAGGTGAGCAGTGAGATGGCATGGCTGTGCTGGGCCTGGGCCAGTCACATAGGATGCTTTTAAATGATAGAAGTGAAGTGAGCTTAAAGCAATCTAATTTTAAAGAATGTGGTGGTGGCGAGGGGAACTCAGAAACTGCGAGAATTGGGGGCATCTACATGGACAGAAATTCCGTAGTTTTGGATACTTCAGTGCAGTCAAGAATAGGCAGGGAGGCTGGTCCCACGTTAAAGGCAAAGGGCTCGGGCAGCCTAAGGGGTTGTTCAGTGCAGCAACTCAGCTGAAGGCCTGCAAGTCCAGGGAGGACAGCGTATGGATTTTTCACCAGCCGGAGCGGTTGCAGCGTTGCAAAGCGCGCGGCGGAGCTGCACGTGGAGACGCCAAC…
CUFF.20274.3	chr2:38203449-38239018	+	ggacgacagaggataagatgagatggacatgagtttgaccaagctccaggagatggtgatggacagggaagcctgacatgctgcagtccattgggtctcaaagagtcagacatgactgagtgactgaactgatctggactgaACTTGGCCTAACACCAAAACAGCAGCAACCACAACAAAGAAAATAGTAATGGAATGAATAATCGAGCTCTAAGTCAAATTCATGGTCAATCTCTTGCAAATGTATGTGACCAAGATAAGAAAATACCGGGCTGATAAAGAACAGAAATGGCAGGAAATGGAAATGAGAGGTCTTCGGCGTCTGGAAGAACTGAAGAAATTAATGGCTGAACAGTCAGTAAAAGACAGAGAAAGGTAAAAAAAAAAAAACCAAAACAG…
CUFF.20281.1	chr2:38454237-38461268	+	GGATTAATCTGTGTTAAGGTTTGCCAGGGAACCCTCAGGACATTGAAGAGCTGGGCAAGATCAATCTGTTATGGGGAAATCAGCTGAATGGAGAGGCTGCTAACTGGAAGCACCTGCCAGGAGAAACAAGGAAAAAGAACAAGAaggggctgaatgaaaagaggaaagagcttgggctttgaagtcacaaaaacctgacttctgtcacgtcaggcaaagggcttcatatcatgaaggagagagccccttgagggcagggaccctgtttaattcacactgcattcctagcacatccaacagtgaatgatcccagcagtccttaaatagggatttgtcaatggactgaaGAAATGATTGAATGAATGAATTTTTACAGCTTCTCTAATTACCCAGTGCTTT…
CUFF.20300.1	chr2:39984364-39994484	-	GGAAAGGAAAAAACCCAGAACTTTCTGTACTACCAATTGGAAATGCCATaatcctaaattctcagggaaaagggtttccggacagaactaaatatcctgaaggaccttcagagggggctagtgtttccctgaaagtaggaagaggatacccacaggcacatagaaggggagagagaaacagcgtgatggatgtctcctgaggaagagacaaggagctgggagctgATACTGGAGGAGTTGTGGAAGTACGGAATCCAGGCACTTCAGCATGAAAAGATGAAAACTGCCACAAATGCAGCAATGCTACAATGCCACAAAACTGCTAGCaatgcagctgacacagagaaaatggatccaagagatggaggggaattgggagttcaagacttgagcctggat…
CUFF.20325.1	chr2:42411509-42725198	-	tgagaggcactggtttagaagcgaaagaaggtagagtgtattagcaaaggaaacaaagataatgtggtcagtgaagtagcaaatgggagagagagctgcattacaggttttagcccaagaaaatgtttcaagaaagagagtagttactagtcagacactgcccagaacagagccttggctggtgtacgttatatagcaacgaggaggtcactgctggacacacagacttgttggagaggctcatttggactagagatcctggttccagccatgatgtgatggggccttccaccaggagatgcagATGCATTTTGTAGGAGTATTCTGAGGATGAATGTTTGCAAATCATTCTGAAATTGCCAAGTGCC
CUFF.20325.2	chr2:42447410-42725198	-	tgagaggcactggtttagaagcgaaagaaggtagagtgtattagcaaaggaaacaaagataatgtggtcagtgaagtagcaaatgggagagagagctgcattacaggttttagcccaagaaaatgtttcaagaaagagagtagttactagtcagacactgcccagaacagagccttggctggtgtacgttatatagcaacgaggaggtcactgctggacacacagacttgttggagaggctcatttggactagagatcctggttccagccatgatgtgatggggccttccaccaggagatgcagaaaagaaaaagaaaggaagaaaaagagaagggaaggaggaaggaaaaggaaaagaaaacagcaaatgttggcaagaatgtggagaaatcaaaatc…
CUFF.20325.3	chr2:42493826-42725198	-	tgagaggcactggtttagaagcgaaagaaggtagagtgtattagcaaaggaaacaaagataatgtggtcagtgaagtagcaaatgggagagagagctgcattacaggttttagcccaagaaaatgtttcaagaaagagagtagttactagtcagacactgcccagaacagagccttggctggtgtacgttatatagcaacgaggaggtcactgctggacacacagacttgttggagagTGTCTCATCCTTTAGGAGTGtctacatggctctcactccagcagac
CUFF.20387.1	chr2:46535881-46599714	-	tgacggagcaattaaACAACAACGGTGGTACGCCTAGATGGCCAGGTAAAAATGGAGCACTGACAAGCAAGCCCCAAGGAAATGTGTAACCTCCACAGGATGTTTTATTATTGGCTTGGGAGGAAGTGATGGTGTGGCTTGAGGAAACACTCCCTGGAGAAGAATGATTGAATCAGAGACTCTGAAAGGAAGGTCACTTTTGTCCTGTTGAGAAGGCCAGGCCATCACAAAGTGAAGCACTCTAAAGAAGGCATGTTTTGTAATTTGCTCTAGTTTGAATGAGAACAGTTTTCTGAGTGAAAAATTCATAATGGACGTTCTGCTACCTTGTGTAAGTGGGAAATGGTAATAATTGGGTGATGTGGCTGGATGGTTATTTCTTTTCTCTAGGCCTTCATT…
CUFF.20387.2	chr2:46535881-46599714	-	tgacggagcaattaaACAACAACGGTGGTACGCCTAGATGGCCAGGTAAAAATGGAGCACTGACAAGCAAGCCCCAAGGAAATGTGTAACCTCCACAGGATGTTTTATTATTGGCTTGGGAGGAAGTGatgagaaattgaagtacagagatgttTTTTTGTCCTATGTGACTATGGCCATCCCAGTGCTGGTAATGATGGGGTGAAGGTGTATTCTCAACAGGTAGACTCCAGGGCCTGCCCCACTTCTGTGGAAGTGATCCTGGCACAGTGAAGCCATACGAACTGGCAGAGGCTTCGGATCAGCCATACCACAAAGGATGCTGCTTTTCCTAGCAGGGGCCCTAGGGAATTTTCTGAAAGAACCAGGACTTGACACTGATACAGGGAAGTTTTGTAT…
CUFF.20395.1	chr2:46672584-46675464	-	TGCACATGTATGGGGAGGATGATTAAGTAAAAAGCAAAGAAAAGCTCACTCTGCGCTATGAAATGCAAGAGCCCAGTGGAAAGGCCAACAGCTAAAGGCAACCCTGGACATCCAATAGCTTCTTCTGCTGGTTGGAATCACACCATCAAGGACCAACAATAGAGATCTACTATCAGAAATGACTGTAATTGATTTTTACATCTAACATGAAAGGTATTAACTTCAGTGCTTTTTCAGTTATCCTTCATAATAATCCTAATGTCAGAAAAGTGGCTATATTCTACAGAGTCTTTAACTTGTCAGTGAAAACAAATTTTAATTTAAAAATGGAAAACAGGATCAGTCTGAGAAGCAGGCCAGGAGTTCTGAGTGTATCTTGTCTTTTTACTTTATTGCCAT…
CUFF.20395.2	chr2:46675294-46681547	-	CAGAGGTCACGGGGTGGTCCCACAGAGTttccagggacctccccaggagttcccatttcctggtcctcttctgtgatcagacctattgcttcccggacttctgtgaactccagcttttctgcttcaagttgaagtggtgactttctgtccaattcttcacctacctgcccttgcagaccaatcttcactttcttgcttctccctccttcaaGTCAAATAATCTACAGGCAAACCAGTCCACTCAGTGCTATGTGCTCTTCTTCACACAACATTTTCGGGGCCTGAATATCCTCTTCTCACTCTTCAAATCCTACCTGCACTCTTGGGTCAGCTCAAATTTTGTCTCCTCCGAAGACTCTAGACATGCCATAAGCGCTATGAATTGGAGCAGACATAAAG…
CUFF.20468.2	chr2:51343373-51344235	+	ttcagatcaaacagagacaaggagacagtaaagttagaatctcagattctttgcttaaaacttttgaggaaggggtacgttttttcaggtgcaattgctgagaggatggaagatgagtctagcgctgtcagctgccttctgtccgcctaactggagaacctaccgtaagcagaaacaacgcagagagaagcagagctaagagatggaaagaCTCCTGAGAAGGCCCCAAAACAGATTTTAAACCACAGAGTGGACATTTTCAGTGGCTCAGGTTAAAGTAAGATAACGACAGAAAATCTCAACTTGAAAACTgctgctgctgctaagtcgcttcagtcgtgtccgactctgtgcaaccccatagacggcagcccaccaggctcccccgtcc
CUFF.20468.3	chr2:51343373-51410030	+	ttcagatcaaacagagacaaggagacagtaaagttagaatctcagattctttgcttaaaacttttgaggaaggggtacgttttttcaggtgcaattgctgagaggatggaagatgagtctagcgctgtcagctgccttctgtccgcctaactggagaacctaccgtaagcagaaacaacgcagagagaagcagagctaagagatggaaagaCTCCTGAGAAGGCCCCAAAACAGATTTTAAACCACAGAGTGGACATTTTCAGggaaaataaaaaataaaaactctggaaaagactcaccatgccagatcccttgaagaatatttatgattaatgggaggagcgaaaaacatcacattaataacaagggtttggaagaagttgattccagtcttcatgg…
CUFF.20468.1	chr2:51343373-51447505	+	ttcagatcaaacagagacaaggagacagtaaagttagaatctcagattctttgcttaaaacttttgaggaaggggtacgttttttcaggtgcaattgctgagaggatggaagatgagtctagcgctgtcagctgccttctgtccgcctaactggagaacctaccgtaagcagaaacaacgcagagagaagcagagctaagagatggaaagaCTCCTGAGAAGGCCCCAAAACAGATTTTAAACCACAGAGTGGACATTTTCAGCATGTACTGGCCACTATCAACTTGACAGAGGGGGAGGCTGTTGTTGGAGGATCTAAAGCCTGCACAGGATGTCAGGACCTCAACAGTCTTCCATGATGGGACCACACTTCATATCTCTGGGCCTCATGCACGTGTT…
CUFF.20472.1	chr2:51517216-51591197	-	TTTTGCCCTTGAAATGGTGAAGACCTAAAGTGTAAACCTCCTGCAAGATGCAATATTGATATCTTCATTCCCTTCTCAAGCAGGTTTTTGAGACTGAGTACATTCATCTGAGCTGTTAGCTGCTATGCTCCACTGCATCCTCCTATGATCTGCCTGGTCCAGACCCCTGGAGAAAATTTGTGCATGCATACAGTATGTGAACTTTAGATAAATAAATAAACACGCGAACCAGCTTCCAGATAATTGAAAGCGAATGAAGGAGGGAGCAAAAAGAAAACAATTTCTCTGGGGATAAGCGGCTAAGGTGGCAGGTATGATTAAAATCCATATGATTTATGGGCAGGTGGATTGCTAACATGACAACCCTGTTAGTGTGTGTTTGTTTTGGTGCATTTGACA…
CUFF.20465.1	chr2:51602541-51803360	-	GGATAGAGGAAAAGTATTCAGAAAAGCCAaagaattgatgcttttgaacagtggtgctggaaaagactctggagagtctcttggactgcaagaagattctatcagtccatcctaaaggaaatcagtcctaaatattcattggaaggactgatgctgaagctgaaactcctgtactttggccacctgatgtaaagaactgactcactggaaaaaaccctgatgctgggaaacactgaaggcaggaggagaaggggacaacagaggatgagatggttggatggcatcactgactcaatggatatcagtttgagtcaactctggtagtttgtgatggacagggaggccaggtgtgctggagtccatggggttgcaaagagttggacacaactgagtgaccga…
CUFF.20465.2	chr2:51604308-51626606	-	TGAGGGAGTCTCTTTCTCAGTCTTAGGTAGGTCTACACATCCCTGCCAATATAGGAGACCTCCAAGGCAACCAGAAGAGGCTACTATAGACTCTTGGCCTCCTATGTATTGGTAAGAGAATGACTGAGAAAGATGAAGCCTTTACCAGTGCTTCTGTTTGTAGGGACCATTTATATCCAAACTTCCTGCGAGGTTTATTAAGTATGTtgatttgggggcatctaatcgatggacgtgagtttgagtgaactccaggagttggtgacggacaaggaggcctggtgtgctgcaattcatggggtcacaaagagtcggacacgactgagcgactgaactgaactgaATCAAACCTGCTGAggaggtggaagctaggaaccatttaagACCGTGCCTTGCATT…
CUFF.20465.3	chr2:51604308-51719967	-	GGTCAAAGTGGAGTCCTTTCATGCCCACCATTATGTTTCCAAATGCTACACCGTGCCTTGCATTGAAGAAGACAGCATGATGAGGAAGCTCAAGAAGTAGGAAAACGAAAATTTAGGATGTCAGGATCATGAGAAGGAGGATTCTGTTTTGCATGGGTCAACATGACCCTTGAACATAGCTCTGTAGCAGAGACAGGTGATAGTTgaagaagaaggaagaaaagaagaaggagcagaaggggaagcagaagCAAAGCAAAGCAAAATTAATAATAATAGCATTTTCTGGAACAAGATACTTGTCATCTTTGAAGGTATCAACAGTGCTAAGAAGAGAGCCCCCATCTGCACTCTTAAACAAGACTCCTCAAATCAATTCCTATGGCTTTGTATGTGGTG…
CUFF.20476.1	chr2:51697675-51806169	+	ATCCAAGGAATAGAAAACATAACTGGAGCACAACTGTATGATGATTGATGTCCTCAGGAAAAAATATAAGgctgttgattactcaaacctggagctattttacagagacatcattgtgcatatgcaagagaggatgaccccagaacaagaattatcagtctacagaactcaaagaacagaaatgttgtcagcagagctctttacagagcaagtccttcaataagaaaaacctggcttccaggagcccaagtagcttgatgattgattcaggagcagccaatcggcttcagagtttgaaattctcctaaccccttaaatttcaccctgaatcccaggtaagaaagacagatttgagccctgggcttctgggctccttgccagtagacctggcaataaagg…
CUFF.20525.1	chr2:59083890-59120511	+	AACGGGGAGTTTCCTTTTGTTGACATGTTAATTTCAGTGCCCACATTTACCAGGCTGAAACCCAGGGGAAGGATTTAGCAGATGATATTTATCTCCTAGAAATCACCACGAGACCTTCTCAGAAGTGTTTTGTAAGAAGAAGCCAAAAGACTGAACCCTTGAGTGATaaatatatgaagatattctgtccgcagacaggcatgtagttggaagagtaaggagaactctacttgcctttgtagGAAACAGCTTTGGATAAGTCTAAGACTTCACGAGAGGCACCAACCCAGTACATTTATTGCAGAGTTAATCTATGCTCACCCACTGACCCTGGACTTCTGCATCAGTTTCCAGCGTCTCTCCTCAAATTTGATTGACCTCCTTGTGGTTTTCCTCCTC…
CUFF.20554.1	chr2:61043617-61044769	-	GAGGTGGGGGCAGTAACATTTATGGAGGATCATAGGATTTCTGGCACTTACCATCATTCTCCAATGACCTGGGGACTCCAAGGAGGAATAATGACCTGCTGGCAAAGgttgtttctgcatcttgcccatcgtagtcacacaggacctaggctgacagaAGGATGTAGGTCTTTGAACCCGCGAGTCTGGGCTGCaggggaatgattttccagatactcagcctccatctggccttgttcttaaaactggtctgcttgagaactcacccctcccttttataagaacctttgtcccctcttcaaaataaaccatatc
CUFF.20560.1	chr2:61285889-61496519	-	GAGGGTGGAGGTGGGAGTGGGCTGATGTGAAGAGGGGGCGTGGTCACAGCTTCCTTGAGCCCACTATATCCCAGGTGATAGGGAAGCTGATGGATTAGGGAGGAGTGGATGAAAGGTAAGCCAGGGAAACTAGGTGAAGGAAGTGGGTATTCAAGTAAAAAGTGAAATGCATGGAAGCATGCCCAGCGTTTTGTCCATGCCCAACTGGATTAGGAACAGCTGATGAAACTTTGTGCATGACAATACCTGACATCATCCGAATGGCCTTCTCAGAGTGCAGTTAAGGATCAGAAAATTCAGTCCTGGGGGATATTAACAGCTAACTGAGATCTGCCTGGGAACAGTCAACATAATCAACTTAGACATTCTGAGTCCAACCCAATGGTCACCTTATTGAGC…
CUFF.20560.2	chr2:61486462-61496519	-	GAGGGTGGAGGTGGGAGTGGGCTGATGTGAAGAGGGGGCGTGGTCACAGCTTCCTTGAGCCCACTATATCCCAGGTGATAGGGAAGCTGATGGATTAGGGAGGAGTGGATGAAAGGTAAGCCAGGGAAACTAGGTGAAGGAAGTGGGTATTCAAGTAAAAAGTGAAATGCATGGAAGCATGCCCAGCGTTTTGTCCATGCCCAACTGGATTAGGAACAGCTGATGAAACCTCTCCTAGGCCTGGCAGAGAAAACAATGTGGAGGAGACAGAGCTGAAGGATGGCTTCACAAGAGCAACACAACAATGAGGAAGACTGCTTTGAAGTGACGTGAACCCCTGAACTTTAGGAGCGATTCTGCAGCGACTGGAGGGGAAAGATGGAGGAGCATGAACTCTTT…
CUFF.20620.1	chr2:65212990-65216749	-	GACCAGGGAGCAGCGGGAGGAGGGCGCAGCAGGTGCCGCGGGGATCCGGCGGGCGCAGTCTGCAGGACCTGGGAGGCAAAAATTCCATCAAAACACAAGGAGGACACAGGAACAAGCCTTAGAGATAGTAACAGTAGCTATCATTTATTAAGCATCCACCATATAAAAGACACTGAAAGTACTTTATCTATAAGGCTTTCCCTTCTCCCCCCAG
CUFF.20635.1	chr2:66022255-66023135	+	GATGTATGCTGCTTGAAGTCCAAGGTGTGCAGCCTGAGAAAAGGTACTTGTGGAATTAAACCTATGGAGTCTGAGAATAAGGAATACATTCACCATCCAAgaaaagaatgcccaaccagcaagtaggaagcagTGTCTGAAGAATGAAAAACAAGCGTTGGTCTATGGAGAAGAGCACTGTTACATAAAGAGCTTCTCCATCCGTGGTACCTGCCTGGACTTCTTTGAGAAATGTATCCTTCAGATCACTCCAGGACAAAATCATGCTCAAAT
CUFF.20642.1	chr2:67308554-67309421	-	ATGTGTGCTGGAGGGAGCAGGGAAAAGAGATACAAGGAGAAAGGACAGGGCACCTCGGCGCTCCCGACCCTCCAACTTTGGGAAAAGACGACACCGAACTCACGAGTCACCCCAACCCAGGGACAGAGACGAGATGGAGATTCACCGTATGGTTATGTTACAGATTCCTAAAGACCGAAACAAAACGGGGTGACCAGAGAGGAAAGACAGAAAACGGACTAAAATTACCCTCAGCCAGCACAGCGCACCCCCTCATTTCTGCAGAAACAACACATCTGGACTCAACAAATCACTAA
CUFF.20667.1	chr2:70424706-70429153	-	CCCTGCAACTTTCAATTGCTTGTGCAATGTAGCATAAAATGTAGAGGTCTCCCTTTTCTTTTCTCTCTTTTTTTTAAAGGGGCCATAAAATTAATTACAATAAGTAGGCAACGGGCAGGGGCAGGGGGTTAACTGATGGCTCTAATGAGCTGCGGAGCTTTGGGAAAGCTGGACCACTCATGCTGTTTGTTGGCTGCGAGGGGCCATGGCTTCCAACAGGAGCACAGCGTAAAGAGGTCCTTTGGACTGATTCTGTCTTCATGGCAACCAAAGTAGCTAAGCTTCAAACAAAAGGAGCCTTCCTTTCGGAAGTGTTTCCTATCACAGGAAGAAGGGAGTGCTCAACTTGGTGAGGGGAACTGAGGAGTGCCGCAATATCTTTAAAGAAGTGTTCTATTA…
CUFF.20668.1	chr2:70429413-70438173	+	AGAGAGGCAAAGGGTGAGAGAGTAGAATGAGAGGCACAGTGGAGAAATATTAGTTCCATTAGCAGAATGACTAAGCATTGCATGGCATATTTTCAGCCTGTGTTTTACTAGGCACTGATCATTAGTGTTTGATAAGTAGTTCAGAATTGTAAATAAATCAATTTGTGTTTTCTTTAAGCGTGTTTGAAATGGAACAACGTATTGACTTCAGAGGAAAACATGCTGAAACCACAATCTTCCTGGAACACCTGGAAAGCTTAAACTGGTTATTCTCCCCATCCCTGAGAAAGGATGATACCGTCCGTCTACTCTGAGTTCTGAAGATCAACACACTTCTCCATGCTCTTGTTTGAAGAGAATTTGTCTTGGCTGGGACCCCATCTGTAGCTCTTGAGGACA…
CUFF.20668.2	chr2:70432495-70438173	+	GAGGCCAGGGTTGAAACTAGCGGTCTTAGACAAAATGCTAAGCCTTTTTGCACCTTCGAATTCTCACTACTGTAAAATATTCAGAAGATTCAGTGTTTCCCTGTTGCCTTTAGAATAACAGACAAAATCCTTCATGCTTACAGAAACCACAATCTTCCTGGAACACCTGGAAAGCTTAAACTGGTTATTCTCCCCATCCCTGAGAAAGGATGATACCGTCCGTCTACTCTGAGTTCTGAAGATCAACACACTTCTCCATGCTCTTGTTTGAAGAGAATTTGTCTTGGCTGGGACCCCATCTGTAGCTCTTGAGGACAGAACTGAAAAGCTCACACTCATGCTCTGGGCTATGACTCTCCATGAAGTTTGCTTCTAGAGAAGATTTCAGTGCTGCATTTC…
CUFF.20681.1	chr2:71976949-71996412	+	cagactgcatagagtttttaaagggtgggTGAAGAATGTGGAGGTTACCGCACAGGAAACCTGCTTAAATGCCGTGCTGCTGCCACTGCTACAGTTATTCTAAGACCTTGTGTGGACAGTAATGACCTCACGTTTCCGATTGCCTGCTGGCAGAACCTACAATGTACGTGCATCAGAGTTGGCCCGAGATAGACAGCATACAGAGGTGGTTTGCAACATCCTTCTTCTGGATAACACTGTACAAGCTTTCAAAGTTAATggattctgtgagtcaagggtccaacagagatgatttatacccgctgctgcatatgttggacctcagctggaagactcaaagtctggaggctaaaattctttgaagtctagctcactcgtatgacAGTTACCTGAGACCTT…
CUFF.20722.1	chr2:73723607-73762412	-	TTAATCCCCGCACCAAGCGCTTAACCTCATTGGGGTGGAGGAGAAGGCGGCGGCCGTCTGGTCCGCAGCGGCAACAGGAGCGAATAATACGGCCAATGGACTGCTGAATTATGAAGTATTTCAGACCCAGGAGGAGAGCGTCACTCTGCCACTCATTCCTTTCTCCTCTACTAGTTATTTAAATTGGACTTTTAATATCCTCCCAGCTGCTCTTCAGCCACACATGGTGCATTGCTGCCATTCCTCGGATTGCATCTTT
CUFF.20753.1	chr2:80418507-80423974	+	ATCTTCTTAGTTGTTCCACAGGCACCTCAAAATCACCATCTTGTTAACCAGTTTTCCTGTCCTCTTACCTAAACCCAGTCTCATCTCCCCCATCAAATCAGTCACCAAAGGTGAATGGCTCAAGGAACAAATATGATCCAAGCTGAACCAAGCAGATTCTACTAAGAATTTACAATGAGGACCCAGAAGATTCTAAACAGgaaacagaagcacagagagctccagttacttatccaaagtcacacaggaagcaagttactgaataactgagctgagatgtaaagtctagagcctgaagcctgctacctctgAAGATGTGTAGGAAGTGCTAAGGGCTCAGGGAGCTGGGGTCCTAAATCAACTCTCCAACTTTATCTTTATCCCTGGTTGCATCAAAGT…
CUFF.20756.1	chr2:80534574-80621539	+	caggcaGTACTGACAGCCGTGGCTGCAGGcagcagttttcagaatgtgatcccgggactgacggacaacagagcagcaccagggaaatgtgtgaggaatgcaaagtcctgggcttcaccctagacctcctgagtgagaagccctgaaactggatcccagctatgtgtgctttaccaagcctacaggtgatctaatgctgtacactcaactttgagaaccCCGGCTTAAAGAAATGAAACTTCCATTGATCACTGTTCTCCCATCTGCTGCCTCCCTGAGGGCTGCCAGCCTCACCTGTTTTTCCTTGTTGTTGCCTCCGAGCAGAAATactgtaatagttggggttttggcagccatttggatcatgagcaaccttggtgatggaaggtacagtcaatg…
CUFF.20777.1	chr2:85631508-85633487	+	cactgtgctcactgttgaaaatttaaaaatcaaaatgaggagaacaaaggtcttgcccttgagtaacttacagcccaatccaggggagCTGTGGTTTGATGGACATTCATCTCACGCGGGGCTCAGCTATCTAAGAACAGCGAGATCAGTTCAGCCAGCCACTCGCTAGGCAAATGAGGACTCATCTCGGATCCGACTGCATTCATTTGACGGCGAAAGTTAATTCTCAGCTGCAACCCCAGGGAAACTAGAAGTATGGATTAATTGCCCTTGCGCTGGTAAAAGGTGTTCTGCCCAGCTACTTAAAGCAAAAGCGCATTTTCTTTTCACTGTAGAAGACATTGTTAAGTTTGGATTCCCACTCTTAAAACTCAGAAACGACTGAAGTTTTATTCTCAA…
CUFF.20828.1	chr2:88855629-88896834	-	AGGGTCGCGTCCAGTAATGGGGTACAGTTTGGAGTTAACCATGCTTCCCTTTCTCTAGGCTCAACTTTCAGGTGTTTTTTGGTGTGTTTTAATAAGCTTCTACCAAAACTGGACATTGAGAGGAATGAACTTCACATGAGAGGGGACCTAAGAACCATCTGCAGTCTTGTTGCTTctcttctccaaactgaggattcacagactgaggagacatggcccaggaatctccattttaacaactcccaaggtccttcttaggcaagTCTGCTG
CUFF.20935.1	chr2:92739188-92749578	+	aggagggataaaatgctatgattggctagccctgagtgatgcactattaaggataggattgccagttccaccagaattgcaggggctgaaggagaagtattgcaatagaaagaggggtcttgtgaagaaaaaaaaatCATTGATAGTTTCTGGAAGAATGAAGAGAATATACAGGGTTCAGAGAGGCAAAAATCAAAGGACAGGCATCGGGATTGACCCTCTAGCATCCAGAGGTCCCAGCTCAGGACTCCATGTCTACAGAGACAAGGAGCATGGCTGCCAGGAAAGAAGAAAGCAAAACACATCACAACACTCCTAGGGCTGAGAGTTTCTGCAATACAAAAGCAAGAATACTGCTCCACCTGGAGACTCAAGGCTCAGATGTCAAGCTGAAGGCTC…
CUFF.20943.1	chr2:92890442-92912017	-	GGCCAAACTCACAGGAAAGTCAGGAAAACTAGAAGCTGTGAAGGACACGGATCTGCTGAATATATTAACCTCGCATATGTGTGTGGATATGTGTTTTCTAATCCTCTAAGGCTAAAAGAATGACCAGGCAAAATGAGTGACCCTTTTGACATAAAAGTCAAGAATTATCCTGAGGAGACAAGTGCTGTTCAGAGCATTTTAAGCCCTTCGTCTTTCACCACAGACACCAGCAGACCTGACGGGACGCTGCAGAGGCAGCAGCTGCAGTGAGCAGGCATGATGAAAGCACCAGGCCGTGAAGCCCCATTAGGAAAAGCCAGCCTTCCGGGATGGAGTGGAACTGTTGAGCGTTGCCCTGGAAATGTGAACTAGAGGCTTGACGTTTGAGCAATGTCTGAT…
CUFF.20946.2	chr2:92942467-92963729	+	AGAGGTCTTTATTTATTGCAATATGTTCTCTTTTTAACAGCGGACATATTTTGTTTTCCTCGCTCCAGTCTGTCAAATTATCCTCAAATATATACACCTTTCACCTTGAGTGCCACCCCCCAGTCCTGTTCCCAGGCTTTCCATCCCCTGGGCCGAGAGCAGACTAATCCAGCAATGGTGCAAAGTGGTACAAGCCCCTCCAACGGATATGAATCTTCTGGAACTCAAAAACATTCTTCAGTGAGTCATCTCGACAGCCTTTGGAACAGTTCAGCCCAAAGAAGTCGGGTCATTGGGAACCAACAGAGATATTCAAGAAGGCTTTTGCCAAATATCCTGTTGCTATTCAAAAGGTATTTTAGCATTTAATAGACTAATTATCCATTTAGTTCCTTGAGA…
CUFF.20946.1	chr2:92942467-92977018	+	AGAGGTCTTTATTTATTGCAATATGTTCTCTTTTTAACAGCGGACATATTTTGTTTTCCTCGCTCCAGTCTGTCAAATTATCCTCAAATATATACACCTTTCACCTTGAGTGCCACCCCCCAGTCCTGTTCCCAGGCTTTCCATCCCCTGGGCCGAGAGCAGACTAATCCAGCAATGGTGCAAAGTGGTACAAGCCCCTCCAACGGATATGAATCTTCTGGAACTCAAAAACATTCTTCAGTGAGTCATCTCGACAGCCTTTGGAACAGTTCAGCCCAAAGAAGTCGGGTCATTGGGAACCAACAGAGATATTCAAGAAGGCTTTTGCCAAATATCCTGTTGCTATTCAAAAGCATCTCCTGGAACCACCGAAGAGGAGACAGCAGGGAGACAAGAGGC…
CUFF.20967.2	chr2:93289727-93451728	+	AGAGGGACTGTGGAGCCAGCAGGGGCGGGAGATGGATAACCATGATCCTGCCTACTGGGTGAAGATTCATCACTTAGAATACACAGATGGAGGAATCCTAGATCCAGATGATGTCTTGGCAGATGTTGTTGAAGACAAAGATAAGAGACATTAGCAGAGTGTGGCATCCATGGAAGATTCCCTGCAAATGTCAGAGCAGTAGACTTGACTGGATGAAAGAACAGATCACAAAATGTCTACTCTTGTTAATCACAGTCACAAAAATCCAATGTAATATAAATATTCCATGGTGCTACTTTGGAATTATACTCTATCCTAAAATAAAAGTAACCAGAT
CUFF.21036.1	chr2:96101272-96105267	+	TAACCCCCAACCTTCAAGAAGCCATTGATAACAACAGAAAGTAGGAAACTCAGTCTTTCTGGTGAATTCACTCTGGTGTCGCTCTCTTGCTCTACTGCTTGTGCTGTATCCATCAGAAGAGAGGAGATTCCAAGACCTGGAGCACAGCCAGAGGACTGCAATCATGGTTTCTTCAGATGCACACTTAAGGAAAACTTCTCAACTCTTCTCCAAGAATCCCCTGCCTCCATCCCTAGAGAATCATGGCTTCAAAATGAAACATAAAACAAAGTTTTGAGCTGACTTTGGTCGAAATCTCAAATACTATAAGACAGAAACTGTACAGTACTGTCTGCAGGTGGACCACATTGTAGGGGAAATAACGTGATTCAAGCCAGCCACCTGCCCCTGCTTTCCAGG…
CUFF.21036.2	chr2:96101841-96105267	+	CAAACTCCTTATTTGTTTCATCCTCTCTTGAAGGACTGCAATCATGGTTTCTTCAGATGCACACTTAAGGAAAACTTCTCAACTCTTCTCCAAGAATCCCCTGCCTCCATCCCTAGAGAATCATGGCTTCAAAATGAAACATAAAACAAAGTTTTGAGCTGACTTTGGTCGAAATCTCAAATACTATAAGACAGAAACTGTACAGTACTGTCTGCAGGTGGACCACATTGTAGGGGAAATAACGTGATTCAAGCCAGCCACCTGCCCCTGCTTTCCAGGATTCTACCACTCAGCTCTGATCAAGCTAGCATCCCTCC
CUFF.21040.1	chr2:96135919-96138608	-	AGGATAAATGAGCAAGAAAGGTGGCCTGAGAAACTTCCTGGACCTGCCACCCTCCAACCTCTCTGATTTCTGATGCTGCAAAGGTTGTAAGACTGAGGAGGGAGCTGGACAGAACAGGGTTCTGGAGGTAGAAAGTCACTCAGGTGAAAATCAGAAGAACCGAGGCTGAAGGTACCTTCTCTTCGGGGGATGCTCTGAGGATGACCCATCTAAACACACACAGACATACAGGACTTGAAGGAAATTGGATTTTGCTGATGCCCTTCATGCCGCAATGTccaaatctgaatctctagtcaagttctgagtgccattacaacattatcagctgcctaatggacattgtggatggatgttattggaacctcaaacttaatgagtgtaaaactgactcattat…
CUFF.21040.2	chr2:96135919-96138608	-	AGGATAAATGAGCAAGAAAGGTGGCCTGAGAAACTTCCTGGACCTGCCACCCTCCAACCTCTCTGATTTCTGATGCTGCAAAGGTTCTGGAGGTAGAAAGTCACTCAGGTGAAAATCAGAAGAACCGAGGCTGAAGGTACCTTCTCTTCGGGGGATGCTCTGAGGATGACCCATCTAAACACACACAGACATACAGGACTTGAAGGAAATTGGATTTTGCTGATGCCCTTCATGCCGCAATGTccaaatctgaatctctagtcaagttctgagtgccattacaacattatcagctgcctaatggacattgtggatggatgttattggaacctcaaacttaatgagtgtaaaactgactcattataataccccccaccccagttccttctccagccttGT…
CUFF.21067.1	chr2:96581809-96584351	+	tctcaaccacaataaaagccccaagccagtgtgctttacctgctctctgcagccattctggaccagcctgagactgctctgctcatcccagagacctcaaattatatCTCTGCTGGGTCTCCTGCTCTATCAGAATTGACTCACCCCCTCAACGCTTCATCCCTGGAGGCACATTACTTGATCTGGATCACCTGGTTGGTCTTGCAATTCCTACAGTTTTAGATTGTGTTTTTGCAATCAACAGGAGAAACAGAATTGGTATCAGGTTTTAAGAATCCATTCCCCAGCTATTCTGAGGTCACAATCATTCCACGTCTCCCAGTGCACCTGCGGGTGAAGTGTGTTGCCCGTTTGAACACTCTTACCACTTCATCTGGTGTCAGTCCGAGAAGGGTCAAT…
CUFF.21067.2	chr2:96581846-96591657	+	acctgctctctgcagccattctggaccagcctgagactgctctgctcatcccagagacctcaaattatatGCCCTGGAACAACACTGCTGTCCAGACAAACTGGCAAGTCTTAGGCCAGACGGGGTTATAATCTGATGGCGTGAACACAGAGGGCAAATGGAGAAGCTGCTGCCAGTTAAACACCATGTGTTCTTCAGCAGAACCTCTTGGGCTGTGTGATTCATGCGCTCCTGGGACATGGATAATTCCTAAGAGATGAGCTAGCCAGCTCCTCAAACCTGAGGACAATGGGAGGATGAATTCTGTGGGCCACTGGAAAGGCCGGAGTGGGCAATTTTTGAATTGATCTTGAAAAGCCTTTTATCATCGGAATAGCTAACATTATTGTTGATTATGTA…
CUFF.21110.1	chr2:101441284-101448103	+	gcaggggggggtggcggagagattcactattgtgttgctgtccttgaagacagaacaaggggtgtggagccaagaaatttaagttacctctgcaagctggaaaaagcaaagaaatgagtcaactctggaaaacccagaaggaatatggccctgctgccaccttgacttcagcccagtggaagacattttggacttcagacctctagaactGGTCACAACTATATCCTGAGCTTATGTGATCATGGCATGGAGTGGGAGTTGAGGGGGCTGGAGATTGTCTGGTCCTTGGTCAACATCCATCTTCCTCAACTGC
CUFF.21131.1	chr2:103147174-103175176	-	gaatccagccaccacgctgagaggaagcctgagcagccgtgtggagaggaactaaggtccctgactgagagccctgggcaagctcccagcctgaagccagcgttagttgaccagctgttagtgagtcacctgggaagtgaataccaccagtccactgatgccgtgtggagcataggtgaccccttggctgcaaccgcctgctcacctctccacatcctgttagcccttggtcatcttccaaaactcaacggtgacatcttttctccggaaagcatactcgaaaatccaatgtgaagtaatcctcttttatgctccatcacatcctgtgcaaacctctatatattgaaattttattgacagttttgtgtctctatttcactaggctataaagttttttga…
CUFF.21279.1	chr2:111494710-111495084	-	GGGGTGGGATGAGGGGTGTTTTGTGTGTCTTTGTGTGAAGGGCTGGGTAAAGTGAATGAGGGCTGACCAAGCTGCAGTTTGAAGCAGTTAAAATGGTTTTTCTAAACAGTTTCTGCCTCATTCTAGGCCACAGAGCCGTCGTGCTCAAAAACTAAGCTTGGCCTCACCAATATGTACTTTTTACTCTTTGGTTGATGTAACAAGAGACTTTAAAAAGTGACCAATCTGTGAGTCTTTCTTTACTGCACAATGGCTACCATATTCATCCTCAATCCAAATTGTATAAATACAGCCTT
CUFF.21303.1	chr2:113305903-113307845	+	AGAGGGAGGGGATGGTTCTGGATTAAAAGAGAATGATGAAGAAACATAAACAAATGCAATGTGCAGACTTGATTGATTCAAATAAACCAAGAAAGAGAATCCTCAGGTTCTAGGATGGTAACGGAGACAACTCATCACTAGGAGGTGAACCACAGATGGTGAAAAGGTTGCCCTGGACCATCCTCTCCCACTGATACAGCTCCTCTGATGATGAATAACCCCAAGCTGAGATAGCTGGTGATGATGAGAATTCTCCGTCAGTACCAATGGAACTGCTGTTCTGATCTTCAGGGGATCATGCCCTCATTAGCACCACATTCTTACCAAAAGAGCTACCACTCTTACACCCCGTCGTCAAATCTCTACGAATTTTATCTATTTGCTGGCCCAAGGAAAGAT…
CUFF.21316.1	chr2:115731736-115756902	-	ACAGCCAGTGAGATGTTGTAGCTTGATAGAGAACGCAGCTTGATGTCTAAGTTTAGCTTCACATCGCGAGCCAGCAGTGAAACCTAGAAGTGTTGGTTTTCATGGAAGCAGCGTGGAAAACCTCAGCACTTCCCGAATCTCCACGGCAAGGCACATGTAATGAAGACCTAAATGACCTCAGCAAATCCTCCTTTAACTCATGGGTACCCAGACTCTAAATATTTCATGATTCACAACCAGGACCTCACATCTTCCTCCTCAGTAGATGGTACGATGCACCCATTTCAGTTTGTTTACTTTACACAATCCTCAGGAGTTTGTTGACTGAACTGCACGTTCTATATCGTGCCAAGAAAAAAGCACTGTGA
CUFF.21451.1	chr2:124429346-124430216	-	GAGGCTGGGATGAGATGCTAGAGTGCAGACAATCAGTGCCACAGGCCACTGAGAGCCAAGGAACCCAGGAGGGCTTGAAAGTTCTGCATCCAGGCTTCTCACCAGGCTCATCCACCCCCGTGGACTGACAGAGCAGTTCCGAGAGTATCATTGATCTTTTGACTAAGTGTCCTAATGAAATACAAACCTGCTGTTACTCAGAGAGCTGTCTGCCATGGAAGAAATGCTACCAGGACAACAATAACCATAATTTCATTGTAAAACCTGCCCTCTTGTACCATGTTTCTCCCACCTCTTCCCTGTTTTGATCTTGGGCTCACAGGTCCAACAT
CUFF.21578.1	chr2:127810759-127812760	+	accggagaatgcattctgtcctttgacatttggagaaacagggccaagaacagaagggacttgtcagggccacacaaggattgagtagctgagtcaggactagaatcaacaaagctggtggagccaaagccgtgcCAGAGCCAACATCCAGCATCTGTGACTTTGTTTTTCTtgaggtagctattattattctcagattttaaatggataggtagagagaggtgaagcaaagtcacacaactggtaagttccaaacctgaaatccCATCCTCAAATGAAAACAAGGACCTGGCTTGTCTTAAAATAACTGCCCGAGGAAACAGGGGACAGAAGCCAGTCAAGTTTGCCTGATATCCATCAACCAGGCCCTggacatttggtctcagcccagctttgcc
CUFF.21627.1	chr2:129196883-129204568	+	gtgtgtgtgtgtgtgtTGATGGCCAGGAGTGGGGGTGTAGGATGCAGGCAGCCTTTTATTTGGAGTGATACAGATCTGAATGAGATGTCAGCAAACCACATACCTCTGGCCAGCACACAAGGGATGGAAAAGTTGAAGTCGATCACCTTTGAAACCTTTAGCTAGCCGGTCATTTCCCAAACTCCAGAACCAGCCAGAACAGGAGGCAGCCAGAGAGAGCCGTGCCAGGAAGAATGTGGCCGCTGTCCTGGAAGGAGAGGACCCACTTGGAAGAACAGAACCCGGCTGGCTCAGCCCCTGAGGCTCACTCTCTCCAGGGACCTGGCCTCGGGCCCTAGTAGCCCACCTCCTACCACTGTGGGCCATCACCA
CUFF.21647.1	chr2:129840848-129842066	+	aggatgggtgaaaggtgggagcaagatggcacagagaaatgcttaccccgatgcctggcacacgctaaatgctcagtaattgggagctacttattCTGCTGGTGGAAGAAATTGTTAGTAGTGGCAGTGGTCATAGCCCCAGAATCCTGAGACCCTGATGGGTAGAAAGTTTAGCTAATACCTTCAGGCCCACTGAGGCCTCACGCatttattcattcaacagtctttagcagagcccctgctgtatgtaccccagtcccagtgtcagacatggcagcacacaggcgtctaaggcaTCGGGAGATATGATACGATGatgaggaaacgaaggttAGATCCAAGCCTTCCAGGGATGAAGCTCACATGCCAGGGCCACCACACTGCAGTGCTGCTGGAGCA…
CUFF.21666.1	chr2:130819537-130823181	+	GGGAGGATCTCAGAGGAGGAGGCAAATGCATGTGTTAAACTGGATTCCTGGGGCTCTGCTGTGCATCTGAAGTTGGGTATTCCATGTCTGGGATATCTCTAAGTTCCCTCAGAGGACTAGGAGGTTTGGCCAGCTTTGCCCACACTGAGGGACCAGAGGGTCATTCTTCCTGGTGCTTCTGTGCTTCTTCAGAGGAGTCCAGGTGGTTCCTAGAATGGTGATGCCAAGTACAGGAAGTAGAAGAGAGTCCAAAGCTGCTTTGGGAAGCCTTCCTTTAACTCATGCTATGAGAAGTTGGGTGGCCTAGGTTCAGAACCAGGGTGCGTCTCTAATGCTGTGCAAACTCGGGTGAATCCTCTCTGGGTAAGTCTAGGTTTCTCTATTTAAGAAACATAAAGg…
CUFF.21666.2	chr2:130819553-130824656	+	AGGAGGCAAATGCATGTGTTAAACTGGATTCCTGGGGCTCTGCTGTGCATCTGAAGTTGGGTATTCCATGTCTGGGATATCTCTGTGGTTCCTAGAATGGTGATGCCAAGTACAGGAAGTAGAAGAGAGTCCAAAGCTGCTTTGGGAAGCCTTCCTTTAACTCATGCTATGAGAAGTTGGGTGGCCTAGGTTCAGAACCAGGGTGCGTCTCTAATGCTGTGCAAACTCGGGTGAATCCTCTCTGGaattcacagattcaagcaaggacctgtcacataagaaatgctcgaagtaactaagctgaagctgatgtttaccgtcccgggcatgtgtcatcttctatttatgcatgcaaaacctgcaagtctattgttacatatatttcaaaagtttatataa…
CUFF.21739.1	chr2:134202899-134203624	+	TGGGGAGTCTAGGCTTTTCCCTGTTTGCTGGCACAGGGTCCAGGTCGGGAATCAGCCCAAGAGAGCCTCAGGGGTTACCTAATAAATGTCTCTATCTGATTGCTCCTCCCAAGGAGGGCTACAGCGATTCCAGTTTGCTGAGATCCTGGTGAAAGGAAAAGAGGGCAGAAGTCTCCCGCCCATTTGCATCTTGCAGATTTTCTCACCAGCAAATGTCTGACCACACTCACCAGATCCGCAGTGACGATCCAGTGTAACCATGGCCGGCTCTTGCCTGGCCTGGCCTTCCACACTGTCTTGCCTCCTTGGACTGTTCTCTCCCAGAAGGATTCGGCGTATACCTCCACCTCTGTGCCAGGTCCCATACAAGGCCAAAT
CUFF.21758.1	chr2:135184272-135188238	-	AGAGGCTGGTGCAATCCCCAGCTCACTCCTGACACAGGGCAGAGACACGCGTTATTATTACCTTATGGAAACAGACAGCGGCAGCTGACTCCCATCTCCAGCCGGCGTGCTGTCTCCACGGATCCATGATGGTTTCAATCAACACCCCTGTGGGATTTGTTCCGCTCTTTGAGGACGCGAGCTTGTGGATGTGGAAATGGTGTTTCTGTCTCCATGCCAGATGGCAGCAGAGGCCCCGCCCGGGGTCCCTGGAACTTGGTGGCTGTTCTTTTGAGAAGAACAAGGCGGAGCAGTCTTGGTGATTCTGTTTTGTCTAGGAATAAAGAGACCACACTCCTGCACAACAGTGACTGAATATTGTTCAGTCTGTACTGTGATGGAaaccatacgaagtgggtg…
CUFF.21859.1	chr20:3427933-3432926	-	CATTTGAGGGTGGGTGGGGCAGGTATCTCTGGTcccttcgagaatctgatgaaaactgctgatcttctttctagggaaaattacacatgtgtgtgcacacagctccttccacaattttgcatgtaatttgatgagcccactgacattcatgcatggaAATTTAGAGGATTACAGCGTGAAGAGCCTTGTAAGCCATGTTAAGGATCCAAAACTTGATCCAGAGGTCATTTAGTATACTACAGcagggtcagaacctctgattttaagctgagcacaccattgtccagaataaaggcagcacgtccc
CUFF.21860.1	chr20:3434407-3436330	-	GCTCAGCATTGTAGCTTGATGTACCTTGTGATCAAGGTCTCAAGATACGTGGTCAGCTTATGGGATTGAGACTGAAGCCAGGCAGGTGTCACATTCCTCTTGCCATCATCGTTGGCCCAAGGATATACTCATGACAAACCCTGAGATGATGAGAAGAAAATGGTTTCTTTTTTCCTGAGGCTGATGGCAAAATTCTGTGCCTGAGGGAGCTCTctctcttgtcctgggcacgaagcagatcagataaaaggttcaaagttgcaggaactgttttgccaccacaagaatcctgagaatgaagccaataaagtgttgagagttgtcaagaaaccaagcttatttaaccttatttgaacccctggacctagctgtgcctgaagccaggacttttcaataaca…
CUFF.21899.1	chr20:4763597-4767990	+	TGAGCAGAGGGTGTCAACGTTAAGGCCTCCGTTATGAAGTGTCAGATCATCCTGGGACCAAGTTATGAGAGATGGGCTGCACGCCCCAGACTGACTAGTGTACTGAGTGGGTTCTGAGTTACAGTGTGTGCACAGTTTATATATATCATCCTTAAACAGCTCCCGGCCCAGAAGCTGCTCAATACTTCTGTGACACGTCTCCTCAGCTCCCACTCCCCAGGCTCCTTC
CUFF.21940.1	chr20:7319296-7323209	-	TGGGGGGATAGGGAAGCCAGAGAGAAGGCTCCGGCAGTAGTTCAGTACAGAGGCGGAAGGAAGAAGAGGTGAAGACCTTTGCTACTGCTTGTCTACACCTTAAGCCCAGTTAGAGGCTCGTTGTCCATTTTAACCCGGCAAGTAGCCTGGAGCTCCTTCAAGGCTCAGCAGGGAAATGCAGAGATAACAAAGGAAAGCAGAGGAGGAAACTCTCTCCCCGGAGCTCTCTCCAGGCAAAAGTTGCTGAGCAGAAGGAGACATTGCATCCAAAGGAACAG
CUFF.21947.1	chr20:7422560-7424409	+	agaaggccacatgagaaccaggtctgggcgatatacagGTGCCAAGGGAGACCAGATGCTAGATATACAGCACGATTGCAAGGCCAGTTGCACCCAATGCCACGTGCCAGGTTGCTGAGAGAGGAACTGTCTAACCTGCTTCTGCTCTGAGATGAGAGGTGAGAGAGAAGAGAGACGAGAGCTGAAGAACTCACATGAGGAAAGATGGTTCCTACACATTAAGCTTGCCAGTTGTGGCCCTGATTCCTTAACAAAGATGAAAATTCACTGGAGGAAATCTATTAAGAGCTCAGTGAGACAAATGAACTTCATGGGTAACTGTGTACAAGGTGAAGGTGAAGTCAACCCAGCTCAGATGTCAGTCAAGTGGGCAATGAACAGTGGACAAAGGCATTCACT…
CUFF.21952.1	chr20:7427937-7495813	-	gccaccagggaaggccTTGGCTGACTTGTTAAAATTCTGTAAGTGATAGGAGGTCATCTAGAAGCCTAAACTAGGAATAGAAAGATTTGACCATGAAAGGCAAATTGGAGGAGATATCATCAGGACTATCAAATTAAATTGCATGTGGCTGATGAGGGAGACAAACAAGTCAAAGATGCTCCTAAGGAATGGAGCCTGAGTACCAAAGCCAGCAGAAGACAGAGGTTTTAGGAAGAAGAAACATTTAACAAGGAAGATAATGACTTTTGAATGTGAAGTGCCTGCAAGCTGTCCAGGAGTTTGCAATGCAAGCCTGGTTCAGTAGAAAGACTGGGTCTGAACATTTATATCTGAGGACATCACATATAGAAGATTGTGGAAACTGGGAGAGCAGATCCT…
CUFF.21952.2	chr20:7427937-7495813	-	gccaccagggaaggccTTGGCTGACTTGTTAAAATTCTGTAAGTGATAGGAGGTCATCTAGAAGCCTAAACTAGGAATAGAAAGATTTGACCATGAAAGGCAAATTGGAGGAGATATCATCAGGACTATCAAATTAAATTGCATGTGGCTGATGAGGGAGACAAACAAGTCAAAGATGCTCCTAAGGAATGGAGCCTGAGTACCAAAGCCAGCAGAAGACAGAGGTTTTAGGAAGAAGAAACATTTAACAAGGAAGATAATGACTTTTGAATGTGAAGTGCCTGCAAGCTGTCCAGGAGTTTGCAATGCAAGCCTGGTTCAGTAGAAAGACTGGGTCTGAACATTTATATCTGAGGACATCACATATAGAAGATTGTGGAAACTGGGAGAGCAGATCCT…
CUFF.21952.3	chr20:7442293-7495813	-	gccaccagggaaggccTTGGCTGACTTGTTAAAATTCTGTAAGTGATAGGAGGTCATCTAGAAGCCTAAACTAGGAATAGAAAGATTTGACCATGAAAGGCAAATTGGAGGAGATATCATCAGGACTATCAAATTAAATTGCATGTGGCTGATGAGGGAGACAAACAAGTCAAAGATGCTCCTAAGGAATGGAGCCTGAGTACCAAAGCCAGCAGAAGACAGAGGTTTTAGGAAGAAGAAACATTTAACAAGGAAGATAATGACTTTTGAATGTGAAGTGCCTGCAAGCTGTCCAGGAGTTTGCAATGCAAGCCTGGTTCAGTAGAAAGACTGGGTCTGAACATTTATATCTGAGGACATCACATATAGAAGATTGTGGAAACTGGGAGAGCAGATCCT…
CUFF.21952.4	chr20:7457531-7495813	-	gccaccagggaaggccTTGGCTGACTTGTTAAAATTCTGTAAGTGATAGGAGGTCATCTAGAAGCCTAAACTAGGAATAGAAAGATTTGACCATGAAAGGCAAATTGGAGGAGATATCATCAGGACTATCAAATTAAATTGCATGTGGCTGATGAGGGAGACAAACAAGTCAAAGATGCTCCTAAGGAATGGAGCCTGAGTACCAAAGCCAGCAGAAGACAGAGGTTTTAGGAAGAAGAAACATTTAACAAGGAAGATAATGACTTTTGAATGTGAAGTGCCTGCAAGCTGTCCAGGAGTTTGCAATGCAAGCCTGGTTCAGTAGAAAGACTGGGTCTGAACATTTATATCTGAGGACATCACATATAGAAGATTGTGGAAACTGGGAGAGCAGATCCT…
CUFF.21952.5	chr20:7457531-7495813	-	gccaccagggaaggccTTGGCTGACTTGTTAAAATTCTGTAAGTGATAGGAGGTCATCTAGAAGCCTAAACTAGGAATAGAAAGATTTGACCATGAAAGGCAAATTGGAGGAGATATCATCAGGACTATCAAATTAAATTGCATGTGGCTGATGAGGGAGACAAACAAGTCAAAGATGCTCCTAAGGAATGGAGCCTGAGTACCAAAGCCAGCAGAAGACAGAGGTTTTAGGAAGAAGAAACATTTAACAAGGAAGATAATGACTTTTGAATGTGAAGTGCCTGCAAGCTGTCCAGGAGTTTGCAATGCAAGCCTGGTTCAGTAGAAAGACTGGGTCTGAACATTTATATCTGAGGACATCACATATAGAAGATTGTGGAAACTGGGAGAGCAGATCCT…
CUFF.21950.1	chr20:7519412-7533334	-	AGTGCCCCATCTGTGCTAGTCACCATGCTGGGCAGCACAGACATGTCCAGTCTTCAGCCTCATAAGAAATCTGAGAGGGACATGAGAGAGCAGGCTTGGTGAGATGGAGTAGGTCACCTAGCTGAAAGACTCAACTCATGGACCCAGACTTGGCTGCCTTTGGAAGAGCGCCATGCTTGTATTTCACATTGCAGAGAGAAACATGGGTGGAAAATGGATGTGTGAAGAGAGAAGCAAATAGCCCAGAGTGTTGCTCATCAAGGTCAACTCCGCCAATCCCAGGCGCTTGACTACAGTgcttaactacgtaccagttgtgtggcttctgacaagtaccccatttttctcatgatagtatgggagtaattattgtccctatcccatagagctgttgaagga…
CUFF.22035.1	chr20:10697108-10703079	+	TGCACGCAAGGGTTTAGTGAAATATTTTTGAAATATTTTCCATTTTGAAATTGGAAAGCTTATACTGCAGACCCAGGCATTTCTGCTCTGTTCCCCCTGTCCCAGAGATGTCATCATGTCTTCATTCAAACACTGCACTGCCCAGAAGAGAAGCGCCTCACAAAGAAACATAAAAGACAAGTACCAGGGAAAGACATGATTCTGTGGAATAAAAAGATGAAAACCAGCCATGACCACATGAAAATAAAAGAAGATAAAGATCATTTCTTGAACAATACCTTCACATCACCAGAGCTGGGGAAAGTGGAAAGAGACAGAAAACTGGTAATTATTGCCAAGAGACTTCATGCATGCATTTACACCGTGATGATTGATTTTTAAGTTTGCAAGTAATCTCAT…
CUFF.22036.1	chr20:11176940-11197136	+	tggtggaagaaggctgggtgtgcgggtggcctcaggagctggaacagGTTGATCTACTTTACACTATGGAAGAGGAAAGGCCAGTCGCTAAACCTGTATAAGGATCGGCTATAAAACAAGGACGGTGCCCAGCTCAAAATGGCTGAGATTATATTTCACAAGTGAGAAGTTGACATGCGAATTCCAGTGTGGTTCACTTACCTGCTTCCCTTCCCC
CUFF.22056.1	chr20:11879790-11981576	-	tgggttgccatttccttcttcaggggatcttcccaacctagggattgaacccatgtctcctagttggcaggtggattctttaccactgagccagcagggaagcccACAGCACTACCTAGGAGGTGATTAAGGAAGGGTAGTAATGATGACCAGTTCCTCTTCTAGAGACAGTTTTCCACACACAGCTATAACCAAAAAAAGGCATGGGGGTAATAAGTAGAGAAGTGAGATTCCTCTTTGGTAAAAATCTTGCCGTGAAAACTTTGCAGGATGACTGTAGAGCATAAGTTGGATGAGACACCCTGCAGAAGCCCTATCGAAACAGAACTAAGCAAGAGGCGGCATTGAAGCAGTGGTGTCCGTACGTGCAATATTTGAGGAGCATCGACCGAGTGAGAC…
CUFF.22056.2	chr20:11977741-11981576	-	tgggttgccatttccttcttcaggggatcttcccaacctagggattgaacccatgtctcctagttggcaggtggattctttaccactgagccagcagggaagcccACAGCACTACCTAGGAGGTGATTAAGGAAGGGTAGTAATGATGACCAGTTCCTCTTCTAGAGACAGTTTTCCACACACAGCTATAACCAAAAAAAGGCATGGGGGTAATAAGTAGAGAAGTGAGATTCCTCTTTGGTAAAAATCTTGCCGTGAAAACTTTGCAGGATGACTGTAGAGCATAAGTTGGATGAGACACCCTGCAGAAGCCCTATCGAAACAGAACTAAGCAAGAGGCGGCATTGAAGCAGTGGTGTCCGTACGTGCAATATTTGAGGAGCATCGACCGAGTGAGAC…
CUFF.22061.1	chr20:12005563-12060939	-	tgtgtgtgtgtgtgtgtgATTTGTGAGCAGAGAGGACGGGCCAAGCTTGTGAGTACAAAGCCTTTCATGAGTCACCCGACTGTATTGTGCTGCTTGGGCCTTGTCTTGCTAAGCACCACTTAGAGCTTTTGTTGGGGAGCCCAGTTGCCTTCCACTGAATCACATGCTGAGCTTAAGGATCATTTATTCAAGCAGCATGGCCTCTCTTCACTGAGGACATTCAGCCCTTCTATCAGCAGACAGGTTGGCAGGAAAGAACATGTGGAGTGGAGAGAAAGTTCCAGGTGTTACTGTTCCTTCGAATGACATCTTTGATCTACAGCCAACAGGATTCTTGAATTTTAAATCGAAGCTACTAGTGACTCAGACTTTAATTGGACACACCTCTTGGCCGAGAAG…
CUFF.22063.1	chr20:12061021-12062214	+	GGTACGGAGCCGGCATGCCTCTGCAGAGATTGAAACCAAAGCAAAGCCAGCTGGAAACAGCTTCTGCGGGAGGACTTCCAGATCTGCATGGAAGGAAGGTGTGTGGACTGGAGTGAGCTGTCATGTCAGTATGCACAATGTCATCGACGGGTGCTGCCTTGCAAAGAATCATGCCCACTGCCCCCAGCATGCTGTCTGCCTGTGGGAAGCCTGAGATCTGTGAACTGAGGGAGCCGCTGTGGTCTACACAAGGGTCTCCTTGGGGATGCACTGCATTGGCAGAAGGAAGAGGCTCCTGAAAACTTGTGTGGTGTGGTAAACTGTGGTTGACTTGGCAAGGCTTCCCTGTATATGAATCAATGATATGTGTCACTCCACTCAATTAAAAAAATACTTCCA…
CUFF.22072.4	chr20:12946713-12998094	-	GATGCAGCCATGAAGAGAGCAGCTCCAGATAAAAGGGCAATCCCGAATGTTTGCTTGGAGGGAAAGGATCATTGAGAAGTTTTACTTAAGGAGAACTTCTGACTCATCTCAAGTCAGTAGAGTACAAATCAGGAAGACCCAAGAAAATGCCCACCTTCCTGTTCTGCCTCTTATGAGACGAGTAAGTCAGATTGCTAGGTTAAGCCAGCGTGGTCTTAAAGACTCAGCGAGCATATGTGAGCATGAGAGAGTAAAGGAGAACGAGAAAAACTGCTGGTCACattaggaagttagaggttggagaggttaaattatttgtttccaaggctcagatgccagtatataatgtaactggttcttcagattggaatcgtctccatcccagAAGACCATTTGAAA…
CUFF.22107.1	chr20:14326468-14340995	+	cggactagttctcgctggcctgagatacccggcaggaggtgtcttgttggggtccaactgaaaagggtcagtaaTGGTAGGAGCAGgccaggcagtgggctaagagaactgagtagtgggatcccatcgtcctcacagcagctccgtggtggtgtaccattgtcgccctcttttgcacgtgagaagccagccgtatggaagttaagtaacttgctccttgtcactcagcgagtGGAGGTGAAAAACAGTTGTGCAGAAGGCTTTGGTGACAGTACGAATGGGCAGCAAAATGCCAAATGCAAGTGGCCAGAGGAAGAGCAGCAACCTGGACATTCAACTTCTGGAAAAATGAAAATTCACTAGAGTCTCCTCTCATTTCAGAGAGCAGAAGCTGCCTGG…
CUFF.22107.2	chr20:14326468-14340995	+	cggactagttctcgctggcctgagatacccggcaggaggtgtcttgttggggtccaactgaaaagggtcagtaaTGGTAGGAGCAGgccaggcagtgggctaagagaactgagtagtgggatcccatcgtcctcacagcagctccgtggtggtgtaccattgtcgccctcttttgcacgtgagaagccagccgtatggaagttaagtaacttgctccttgtcactcagcgagtGGAGGTGAAAAACAGTTGTGCAGAAGGCTTTGGTGACAGTACGAATGGGCAGCAAAATGCCAAATGCAAGTGGCCAGAGGAAGAGCAGCAACCTGGACATTCAACTTCTGGAAAAATGAAAATTCACTAGAGTCTCCTCTCATTTCAGAGAGCAGAAGCTGCCTGG…
CUFF.22107.3	chr20:14336918-14340995	+	CGAGGCACACAGAGAAACACCCATGTATATAGCCGAGGAGCAGACTGACCTGTGGACAGGACTTTGGCTCAAGGACCCTATGAGAACCAGGTGCAGTTTGGGAGCTTTCTGCATCACTCTGAGGCTTGCCTTACCACAGTCCAAGGCCGCCATACCTTGTGTTCAGCAGatagacttgcagagaggaaagaccaggtgaagacacagaagaacactgtctacaagccaggggatgacaaaggccaccagaagccaggagaaaggcatggaactgattctcctttagccctcagaaggcaccaagactagtgacactttgatcttggatttctttgcagccaaaagtggagaagctctatacagtcagcaaaaacaagactgggagctgactgtggctca…
CUFF.22116.1	chr20:14409891-14417352	+	TGAAAAGCAGTAAGGATAATGTGGGATAGAAGACAAGAGGAGCTGCGTTCAGATGAGATTTGAAAGTGGCAGGAGAATGCGAAGTGGGAAAGAATCACTACTCAAGTCAAAACTACTTGAGTTACATATGAGACCCTTGATTGTTCCCAAAGCATCATTCAAAGCACAATAAAAGAATAATCCCCAGCAGATGTGGAAGAGAGAGACCAGATTCCTGTCTGCATTTCATTTGAAGCTGGTG
CUFF.22142.2	chr20:15805951-15810177	+	CTAAAGGATTGTTGCCATTTCAAGGAGGAGAGAGAGGTCAAGTAAAGCTTTCTCATTAACAGTTAAGAGCAGTGATTAAAATTTGCTTCTTGAAGAATTAGTTGTGGTAGAATAACAGAGAACATACATTCCAGAGGAGCCTACAAGACATTTTGAGGGGACACTGTACTCCTCCTCTGTGTGACATGCAGAAGAATGGGTGATTCCAGATTAGAGAATTCGGAGACTACAGGATCACACAAAGCTGCTACCTCAATAGAACAGACCTGCATCAAGACTTCTCAAGGAAAACTGTTCATAATCATATTCTCCTACAAGGGACAGATGGGAGAAGGAGCAGACCTCACTGGTCCTCATCATCCACTATATAAAACAACTTCTTTGGGCTACCCTTCTTCC…
CUFF.22142.3	chr20:15805951-15810177	+	CTAAAGGATTGTTGCCATTTCAAGGAGGAGAGAGAGGTCAAGTAAAGCTTTCTCATTAACAGTTAAGAGCAGTGATTAAAATTTGCTTCTTGAAGAATTAGTTGTGGTAGAATAACAGAGAACATACATTCCAGAGGAGCCTACAAGACATTTTGAGGGGACACTGTACTCCTCCTCTGTGTGACATGCAGAAGAATGGGTGATTCCAGATTAGAGAATTCGGAGACTACAGGATCACACAAAGAAGCTGCTACCTCAATAGAACAGACCTGCATCAAGACTTCTCAAGGAAAACTGTTCATAATCATATTCTCCTACAAGGGACAGATGGGAGAAGGAGCAGACCTCACTGGTCCTCATCATCCACTATATAAAACAACTTCTTTGGGCTACCCTTCT…
CUFF.22142.1	chr20:15805951-16005573	+	CTAAAGGATTGTTGCCATTTCAAGGAGGAGAGAGAGGTCAAGTAAAGCTTTCTCATTAACAGTTAAGAGCAGTGATTAAAATTTGCTTCTTGAAGAATTAGTTGTGGTAGAATAACAGAGAACATACATTCCAGAGGAGCCTACAAGACATTTTGAGGGGACACTGTACTCCTCCTCTGTGTGACATGCAGAAGAATGGGTGATTCCAGATTAGAGAATTCGGAGACTACAGGATCACACAAAGTGGCTTCCCAGCCTGCATTGCGGTGTTCCCAGCAGTCTTGACTCTCTGATCCTggctttgtaatcactggatcacgcctcagTTGAAGGGGCCATGCATGCGCTGATACCTCTCAGGATGTCTGAGGACAAGCCTCTTTTTTCTACTTCTGCTCC…
CUFF.22142.4	chr20:15805951-16117197	+	CTAAAGGATTGTTGCCATTTCAAGGAGGAGAGAGAGGTCAAGTAAAGCTTTCTCATTAACAGTTAAGAGCAGTGATTAAAATTTGCTTCTTGAAGAATTAGTTGTGGTAGAATAACAGAGAACATACATTCCAGAGGAGCCTACAAGACATTTTGAGGGGACACTGTACTCCTCCTCTGTGTGACATGCAGAAGAATGGGTGATTCCAGATTAGAGAATTCGGAGACTACAGGATCACACAAAGTGGCTTCCCAGCCTGCATTGCGGTGTTCCCAGCAGTCTTGACTCTCTGATCCTggctttgtaatcactggatcacgcctcagtccccatcctgatttgtgcagaagaagatggctatatggaaaatatcagtcaactcccttgcctctggtttct…
CUFF.22188.1	chr20:16622831-16697918	-	TGAGCCCGCAGGCTGAGGGAGGGAGTGGCCATAACTGGAGACAGGGGTTGGTGGTGACTCAACAATCCCCCAGGCTTCCACCCACAACCTCTGAAGGAATCCAGGAGAAAGCCCAGGGTCACAGTGGGAGTTCCACTCGATCAAGGTCTCGCCCTCCTTCAACCAGCCTCTAATCTGGTTGCAAAGTCAGCTTTCTTCCACTCAAATTAAATTCTTTTCTAACTCTCAATATGAACTGCTCTTTTCTCCTCTGAGAGCTGTGGTTGTAAACCTGTGATTACCTTGCAGGAGCAAGCTCCCTGCATTTTCTAAGGGTGGTTTCTCGGCAGAGGTAGCGTTTTTTAACGTGGTTATGCCATGATGGGAAGCGAGGTGTTTCACAAGGAACTTCTTAGTAAA…
CUFF.22188.3	chr20:16668835-16697918	-	TGAGCCCGCAGGCTGAGGGAGGGAGTGGCCATAACTGGAGACAGGGGTTGGTGGTGACTCAACAATCCCCCAGGCTTCCACCCACAACCTCTGAAGGAATCCAGGAGAAAGCCCAGGGTCACAGTGGGAGTTCCACTCGATCAAGGTCTCGCCCTCCTTCAACCAGCCTCTAATCTGGTTGCAAAGTCAGCTTTCTTCCACTCAAATTAAATTCTTTTCTAACTCTCAATATGAACTGCTCTTTTCTCCTCTGAGAGCTGTGGTTGTAAACCTGTGATTACCTTGCAGGAGCAAGCTCCCTGCATTTTCTAAGGGTGGTTTCTCGGCAGAGGTAGCGTTTTTTAACGTGGTTATGCCATGATGGGAAGCGAGGTGTTTCACAAGGAACTTCTTAGTAAA…
CUFF.22206.1	chr20:17252554-17256405	+	tcagttggtaaagaatcttcctgcaatgtaggagacatgggtttgatccctgggtttggaagatcccctggagaaggaaatggcaacccaactctattattcgtgcctggaggattccatggacagaggagccagCACAGAAAATTTGAAGGAATTCAAGAGGTGCTGGGCACTAGTCACCAAGGAGAAAGGACAATAAAGGGATGTGTAAAGTACTCAAGAGAAAATCGTTGTCTGTCATTAGTTGAACAGAATGAAGAGTCCTAAGAAGTTGAACTTCCCCAAACAAAAACCAATGACATTTGGAGGGGAATGAAAACTTTTAAAGTTTTTATTATTTACTTGTTGATTTATATCTAATATTTTAACATAATTTATTCCAGTTATTTAAGTACTATG…
CUFF.22225.1	chr20:17782009-17803442	-	gaggtgtgaggtacagttctaaagtacaccttctctgaaacaagccattgGAAGAATTGGGGAATACATTTAGCTGCTTatcacctgctgagggaacttctaagaaccaatgtccgatttcactctgcagtcctgatgccattggtctggagcatggcctggacagcaggaattttaaaagccgctcaggacattctgaagtttaaagaaggtgtaaaacTGGGGAAAGTAGAGCTCCAGGTATCCGTGTGGATTTGAGCAACAATCTTCCTTACCAAATTGCCGGCTTGGATAATCATGTCTCAAGCTTCAAAGATGGAGCATAATGTGGTGGTTGAAgaactaatcttccttattttggattctagatctgctgtttacaaaccgtgtgaccctggc…
CUFF.22225.2	chr20:17782009-17808430	-	gtgaaagggactgaacacaaaggactaaagaaagGAAGAATTGGGGAATACATTTAGCTGCTTatcacctgctgagggaacttctaagaaccaatgtccgatttcactctgcagtcctgatgccattggtctggagcatggcctggacagcaggaattttaaaagccgctcaggacattctgaagtttaaagaaggtgtaaaacTGGGGAAAGTAGAGCTCCAGGTATCCGTGTGGATTTGAGCAACAATCTTCCTTACCAAATTGCCGGCTTGGATAATCATGTCTCAAGCTTCAAAGATGGAGCATAATGTGGTGGTTGAAgaactaatcttccttattttggattctagatctgctgtttacaaaccgtgtgaccctggccatgatacttaatatc…
CUFF.22238.1	chr20:18132237-18135074	+	gactgggctgggtgtcagaagacctgggttgacttccagctgggccattgcttagccacgtgaccttgagcaaggaacttaatcccggcagacccaagttttttttcagttgagaaatgaggTTTTGATAAAAGTGATCTGGGGAATAAACCTGAGCCAAGTGATCGATTTTGTGTGCACGTGGGTGGCTGTGCCTCTGCAGCTATGTGTATACGTGTAAAGTATGAAAGGATCAATCCAAGGAGAAATGGATTTGAGCAACCACAGCACAAACATTCAGAAGTGGAAGTGAGCAGCCGGGATGGTGAGAAGACTGATTTGGATGATTCAGAAACAGACCTCTGCTCCTCGGGATCTGACAGCTCACAGTGAATTGGGACAATAATACTACACGAGACA…
CUFF.22236.1	chr20:18181822-18184276	-	gagcaaagtgagcataccggaccagaagatccatcagaggactgtgctctgcgaatgtccccagaggagacggcattcacccacggccatcaggaaaacagtgctgagagaaagaccaacatcaccaagtctgcaggccagagatgaagatcctggtggaatccgtgatgggaaaagatgcagtttggaatttatggcaagtctactggaagaatcatgacacagacccttgggattctgaagcacagtcatgccatctgcagcagataattgcatgcccattgagaaacagctcttggcctatcactgtgccctgtagagactgatcatttgaccactggacAGTAAACCTATCCATTCCCTCAGACCCTTTTCAGCTGAGTGACCGGAtttgctaac…
CUFF.22251.2	chr20:18677172-18722499	+	AGAGTGCAGAGTATTAACAGGAGGAGTTTGGGGAGTGTTTCAGATTGCTATATAGGGTTACTGAGCCAGAAAAGTGGACAAATGGTTATTGGGCATATATTCAACAATATCCTACTACAAGAGTCCCAGTGTGGTAACATGGCTGTCTTTGACCTCTCTGCTTTCCTTTTGGCCTCTGAGCAGAACTTCCCTTTTGAATAGGGCCCAGAAGAAAACACAAAGCTGGAATTTTCTCCCAAAGGTGAACTCACGAAGGGATAAGAAAAGCCTTCTCCAACAGCACTTTTCGAGATAGTTACAGAAGGACAATCCTTGCCAACAGAGACACTCGGCCTCTAAGTCTGGCTTTTGGAAAATGAATTAGTGTCTTGGTGAGTCCCAAGAAGTTGTTCAACATTT…
CUFF.22251.3	chr20:18719380-18722499	+	ATGTGACCAAGGGAGTTATTTCCTGCGTGCAAGGGGCATAACTAAAAGAGTCGGGCGCAGGTGTAGTGCTGGTTCACATGTACTCAGGTGATGAGAGTTCTGCTGGTTGTTGGGCTGAGGATGGTATTTAACATAAGAAGATACTTTGATTTTCCCTGTTCCCTAAATCTTGGCAAGGCAGATGAGTAGGAGGGGAATCAGTTGTTAAGTTGAGGTTGATGGTGAGTATTTGGACTTTAACAGTGCTTCAGTTCTGGATGCAGAAAAAAGGGATCGGAAATTGTGGCTGCTTAGAAGCTGGAAAAGCCTTCTCCAACAGCACTTTTCGAGATAGTTACAGAAGGACAATCCTTGCCAACAGAGACACTCGGCCTCTAAGTCTGGCTTTTGGAAAATGAA…
CUFF.22272.1	chr20:19814581-19815027	-	GCTTGAGGGACAACATAAAAGCATTTTAACAGAAAGGACACAATGTATTGGGAGTTGCAAACAGGCACATCTGGTTTTCACTTGTGCATCTCCGTCCTGTGGGATAACCCTGACTCACTGCTACGCTATCTGCCCTGGTTCTGCACTTCTTCCCAACACCATGAACTGCAGAGAAGCCCAATAAACTCTGTAAATATCATACCTAAGAAAATGATTTCCCTGTCAT
CUFF.22293.1	chr20:20799330-20811507	-	tgagaggtactcttttcacttaatttactccagcaccactggtggtttgcagtttccagtttcttccagcactccttagaagcaacttctttgcaccttgtcagagatgccggcaccaccaagcagcagccttcccttagtatctgagaaccagctcctccagcactcctccaagctcccaagggaccagcaggaaacaaacggcaccgacagctccaggtcccagtccccctccaagtttctgatgatccccagtcttagGTCATCAGCTTTTTGTACACCTACTGCCTCTCCCCAGCTGCCGCGCGTGACAAGCTTCCCTCCTTGGAACATTGTGGAGTGCCTTGAGAAATTCTCCTGATGGATGCAGAAATATTACCTAGAGAGACAGTGTCCATA…
CUFF.22364.1	chr20:25316193-25373564	+	cccccccccttttttttttttaagcgaagtccggtcggggttgctgcggtctcacgttttctgatgtgaggatgttagggttagagctgctgccagcctcttttaaccagcaggagatgggctagaggatcagagccggcaccccaagaatggcagagcagaattacgaaaggaatccagtctttgctgtctgtgtggcgacactaaatcaaccaaccctggacttgaagctcctcagactgctccttctttgagaaaatagtaataatacccttactgtggaagccagttttggtcaagtcttttgttacaaacagctgaaaAACTGAAGGCGAGAAAGCCCACTCTGATCAGAAGGTGGCCAAGGGTGCAAGAACTCAAAGCGAGaggaagatggtg…
CUFF.22371.1	chr20:25545323-25548120	+	ggctgtttattatttgtggcacatgggttcagttgcctctcaggatgtgggatctttagttccccgaccaaggatcaaactcacgacctcttcattggaaggtggattcttaatcactggaccaccaggggagttcccagaaataagTTGTTTTGAAAAGCCAGCCAGTCTCTGCTATCCCGGGTCTCAGAGTGACAAGATATTCATAATTTTCAGTTTTTCACCCTTTAGGAATAAAGGCAGATTTGTGGATTAGCTAAAACACATTGTGCATTGCAGTTTGCTCTTCCTTTGGAACAACTGAAAGACGAATCTAGTGTTCTATCTTTCAAATCTTCTTTGAAGTTAAAGAGTTTCACCAGGACTGAACGTCCATGCAGGCACTAAAGAATTAGGCAA…
CUFF.22415.1	chr20:31718973-31720551	+	AGACCATCTTTCAGCAGCTGCTGTAGTTTTGTTAGCTCTCTGACTGTTGACAAAGAATCAGTTGCTGTCATTTGATATTGAATAGTTTTCAGGGTTAATTTTCTTCTGCTCGTCTCTCATATTTTTTTTAAAGTTTTGAGTCATTGTATGGGCATTATTAGACCCTTGGCATTCCCAGTGAGGGTGCTGAGGTCCCAGGAGTTCTGCTTCCATTCCAAGGACAGCTCTGCTGTGCTGTGCCTGTCACTTTCGGCGCTCTTCCTACCGCCCCCGAGTCCCCTGTGTTCAAGGTCAGATGCTTGAGAAAGAACGTGATCAAACAGCCAAGAGGAACTTAGAGGTCAGAGCTCTCTGTTCTCCTCTGGCTTGGATCCACCTCCCCCCTGGGACCTTAAGTTT…
CUFF.22415.2	chr20:31718973-31726277	+	AGACCATCTTTCAGCAGCTGCTGTAGTTTTGTTAGCTCTCTGACTGTTGACAAAGAATCAGTTGCTGTCATTTGATATTGAATAGTTTTCAGGGTTAATTTTCTTCTGCTCGTCTCTCATATTTTTTTTAAAGTTTTGAGTCATTGTATGGGCATTATTAGACCCTTGGCATTCCCAGTGAGGGTGCTGAGGTCCCAGGAGTTCTGCTTCCATTCCAAGGACAGCTCTGCTGTGCTGTGCCTGTCACTTTCGGCGCTCTTCCTACCGCCCCCGAGTCCCCTGTGTTCAAGGTCAGATGCTTGAGAAAGAACGTGATCAAACAGCCAAGAGGAACTTAGAGGTCAGAGCTCTCTGTTCTCCTCTGGCTTGGATCCACCTCCCCCCTGGGACCTTAAGTTT…
CUFF.22415.3	chr20:31722877-31726277	+	CTTGTATCTCCCCACCCCCACTCAGCTCTCTTTTTGCTTATACCTGAGGCGGGTGGGGTCTTACAGTAACAGCTTGATGGTCTGCCTGAGGGGTCTTAAAGTAACAGCTTGATGGTCTGCCCACTGAGATTGCCTTCCCTGGATGGACGTCTGGTTTCTTTCTGCCGCAGACTGAGGGTCCTGCCAGGGAAATGCAGACCCTTGCTCCTTCAATATTCAGCGACGTGGTCTCCTCGTCAGTAAAGACTGTTTTACTAATAGCATTAAAAGGTGCTGTCAATAACATAGTAGTAAGGAGTAGAGACAGACTCCCACGGCACCCCCACCCATGTGTCACACCAGCTCAAGATGTTCTGTCATCTCAGAGGAGGCAAAACGGCTGCAACCGTGCAAAATATG…
CUFF.22435.2	chr20:32287644-32306988	-	GAAATCAGTGGTAAACATAGAGAAAGCACAGGAGTGAAGGTTAGTGCAGAGATCATTTGTAGATTATATTATTAGTAGTATAAGGGAAGGTCAGTCAAATGTCAGAAGAAAAGTAAAATGGTTATGGTAGCAATTCAAGGAAAAACTGAAGAGGCCTAAGGCCAGTAATTAAAGGAGGACCAGTAATTAAGAAAGATCACCATCTAAAACATTAAAAATATgagtgatgctgaagctgaagcaccaatactttggctgcttaatgccaacagccaactcattggaaaagaccttgatgctgggaaagattgagggcagggggagaagggggtgaaaaaggatgaggtggttggatggcatcaccaacttaatgcacaggagtctgagcaaactccagga…
CUFF.22435.1	chr20:32287644-32597268	-	agaggcgagaggcggcgggagccacgcgctggcctttacctggctgaagattagattcttaaagctagaatattgatctcctgcttttagacttggacttggataggaactacaccattgggtttcctgtgtcttcaccagatttctgggttcaactgcagatcttggaacttctcattctccataatcacGATCCTTTCCTCTAGGGTGGGAGATGAATCCTTCACAAAAAAGCAATAAAGATTTTATGCAAGAAAATAAAAGAAAATTTGGAATGCAAGATTATATACAAAAGGAGGTAAACTGAGAAGAAGATGGGGATTAAATCCCCTAAAATGGACTCACTAGAGGGCTCTCAAGTCTGTATCCCTTGGAGAAGTCACAAACTGAGACAGATGT…
CUFF.22494.1	chr20:36618446-36620213	-	GCCTTTACTTGATGATGATAGTGGGgattgttggcaagattgaacgaggtcatggatacaaaagaattttgaagaaagtgatgtgccacactgatataaaatattgactatGTTGTGATTTGTATCAAGAGTGCATTTGGTTACCAGTAGCTGAGAGCTGGATTAACAGTGGCTGCAACCATGAAGACATTTAGCATTCATTTTCTTGGATATGCGAGGCCCCAGGATTGGTGCTCTGACTCCACGACGTCACTTGAGACCTGATGTTTGTGCTCTGGATTCTGGTATTCATGTGTCAGTAGTACCTCCTTTCATAGCGCAGGACTCCAAAAGTCATGT
CUFF.22496.1	chr20:36673421-36676124	-	AGGGCTGAGTGGAGGCCAGGGAGTCTGAGCATATCTTTGGGCTGGAGTCTCCTGCTTTTATACCTCCTGCTCCATCGTGTCCTAACCAGGGCTTACAGACTTCTCTCCCCCGTGGGATGCGGATCCTGCGATGCCAATGACCAGAGCTTCCCTTGTTTGTAGAGCCAGCATCTGGCGCTGTATCTGCACAGATTAATTCAGAGAGACGGCTCTAAGCGGCATTCCTTCAGTTGTGCTAGTTCCGGAGTTGGGAAGAACCTGTTCAACTCACAAGCTGGACAGGCCTTTCTCTTGGACCTGAAAGATTTATGACCCGATCATCCAGAAGCCCCACCACAAAAACCTCATTGAGCTGGTTACATGTTATCTTCCGAATATCAGCTCAGATGAAAAGGACCG…
CUFF.22598.1	chr20:41694100-41699736	-	TGCAGGCCAGTTGTATCAGCAAGAGGAAGCTCTGTCTTCCAAGGAATCCCACCTTGGACTTGCCAAATTCCGTCACCTTCAGCTGGCAACACTTTGACTGAAGTTCTCAGACGGCTGCCTGTGGGGTAGAGGGTTGACTGTTGGCAGGAAGCTGCTGGCTTTGAAAAGCATCACAGATAAAAGGCTTATTCTTACAGTCAGCCAAATTTGGAAACCACTGCTGTTGACCCATTATCTCAGACTCGGAGCCCTCATTTTCAAGGAGAGGAAACAGGCTTTGTGGATGAACTGGCTGACTGCATCAGGAGTGTCATCTAGCTTAATGTCTGAAGACCATGCCCAGTACAAGCTCCGTGCTCCCTGATAAGACCCATTCTTCTCAGCCTTGGGGGCCTTGTT…
CUFF.22600.1	chr20:41767017-41773183	-	CCGAACCTCAGCTGAAGACGTCGAGAGGAGATCCCCCGCCCCGCGAAGGTGACTTCAGAACTGGAGGAAAGAATAACCAATGAGACAGTTGGAGGGGAAAAGAGGATTCCTTTGCTTTGGAGATTGCTACCCAATCCCAGCCAGAGAACTTTTTGGGGCTGTCACAGAAATGAAGACTGTTCTTAAAATCATGAGGTCACGAGGACACCCCACGTACTGCAGCCTGTGACAAGCCAAGCGCTTATTACCACTCACCCCTGCAGTGGTTGGGACTGGCAGGCCTGTTTGCACACTTGGTATCATTTCCTCTGTCTACCACCCTTTGTCTTTTGTGCATCCCAGACTTGGGGAAGCTTGTAAGATGAAATAAACTCCGGAAGTGCTCAGTGGAATGCAGGA…
CUFF.22602.1	chr20:41768515-41769066	-	GTCCATCACAGTTTACTGGCAAGTGACTCTCCCTTCTCCTCTCAGTTCTTCTGTTTTTACACCCCTCTGCTGCGGGTGCCCCCTTGGGACAGAATACTAATAGGCCACGATGTACTGTCAGCTCAGCAGTGATCATTAAAGATGTCCAGGCCCTGGATAGAGTGGTTCTTGGGCATTTATACCAGAAGCCTGTTGCAGACTCAGTGGTCACATGGACCTGATAGCGTCCGTTATGTGAGATGATTCGTGGACTTCATTTGtggtacctccatcccacactccagggatgcgtataggaaagagtatgtgatccaggtctgggcagtgaggtgtgaaggaatgtctcttgcggagcttcttgcgggaggt
CUFF.22592.1	chr20:41889784-41899790	-	AGGCAGCATGGAGTTTCTTAGGCTGGGTGACTCCTCACTGCATAATGACCCCGTGGCTCAAGCAGacaGACACCATGACAAGTGTCCACTCTAagatccccatcgaatggaggaaacagatatatgttcaaaaattagtggcataagagctatcatcaagacatccttatggtctgatggagatcagaggaaaagctgttaatagcctgggattgtcatggaaggcttcttggaggagatgatggtgactgagcttatcttgatgggatgaagcaaaagggggtcagcttggagccaagtaagaaaaagATGCTCCCTCTCTGACTTTAAACATACCTGCGCAGTGAGTGTGCCACATTTCAAAAATGAGAACTGATGAAGCAGGAAGAAAAGGCGGAT…
CUFF.22606.1	chr20:43372980-43376481	+	TTTCAGAGATGAAAACTGTGACAGAGAATATAAACATTCATCATGGAAAAAAGAAAAGCAAAATAAACTGCTCCTGACTGTAAGGCACCATATGAAGCCCACCCATATCCTGTCTCTTCCAGTGTTTCTACTTCCAGAGATAACTTCCTCTAACCCAAGTCTTGATTTACTCATGGCTTTGGCGGTCTCAAAATATTGCTCCTCAGTGTGTGCTTCTTTTTTCAGCATTATTGTATTTATTAAGAAAATGTATAGCGCATGT
CUFF.22612.1	chr20:43959585-44020033	+	gttcctcttctcctgttgctgctgaaagcacagggggatttttctctagtacttaaagtgagaaactgcatgagctcctggaagtaaaactcactaacctgtgggagctcccccaccatgactgggttcccctggagtttttaaatgtcagaattgtccacactgagcctccagcaattcgtcagttccagtttggtgttcctattgcagctggttctcttgccagtttctgtgcatgagacagctcaggactcacgtatggatgtgagagttgtaccatagagacacctgagcgctgaagaattgctgcttttgaactgtaatggagaagactcttgagagtcccttggactgcaaggagagcaacccagtcaatcctaaaggaaatcaaccctgaat…
CUFF.22644.1	chr20:50445012-50449743	+	AGGGGTCCAGGCGTTTCTGAGAAGAGAGGCAGCCGCTTCCAGGAAGAAAGTGGTGTCTCTCCTAGCTGCCCGGCTTGGAGGGCCTTTTGTGACTCAAAGGGGAAACAATGCAACGCAGTTTGCTGCTACAGTGATTTAGgagagtaagagagagagagataaagagaggaagcgagaaagcgagagcgagagCGCAATCTCACCTTCGTTGCAAAGCCTGGCTTGTTGCATACATACTGCTGCTGCTCTTTCTGCTACTGATCCTGCAGCCGCCGTTTCTGCCATCAGGTACAGATGAGAGTCAAGATTTATTATCTG
CUFF.22652.1	chr20:52717507-52719116	+	ttggaggaggtcatcaagaggatgtgactgcagcctgaaccagagagctggaccccaaaaaaacagaggttcatcactcctccccgtcctgggaacgtacattctgcctgccattcccacagtggaagccacattcatggacacaatcttgagagagaaatgcattgccgagaccaggtggatggtgtacatgaacctagttcaggcctccgtataaattcttaatcgtctggcaggcagatgcagagatccacgcatcctggggccaccaatgcaagcctggcagAGGATGTCAGCTCCGAGCCCCTGAAAGAAATCACAGACTTCACCTTGGAATAGTTCATCCACTCCTGCTTCATTAACGAGGATTTTGAAAAGAAAACCCCAATCAAGTTCCCT…
CUFF.22652.2	chr20:52718710-52719116	+	ATTGGCTGGTTAAATAGAGGACTATTAGCTTCAGACAGGCTAGATTGATTATACAGCAGCAGCGAGAGCGGAGACTCGGAGCTAAAGGATGTCAGCTCCGAGCCCCTGAAAGAAATCACAGACTTCACCTTGGAATAGTTCATCCACTCCTGCTTCATTAACGAGGATTTTGAAAAGAAAACCCCAATCAAGTTCCCTTTCCAGCCCCACGTTGTTCCCGAGTTGAATAGAAACCGTGTCCGGCTCCTG
CUFF.22711.1	chr20:59066188-59067952	+	AAGAGAGAGCTTCACCAGGTTTTCTTGAAGGACAAGCAATCAGCAGGGCTGAGACAGGACCTATAAACGATGCCATGGAGATGAGAGATGCCCAGCAAAGAACACGGCAGATTCTGCATCTCGCAGGCTGCAGTCAAATATCCGGAAACAAACAGATCCTAGTGCATCTGATATCAAGAACAAGCATTAACTTAAGAGTAAAAGCAAGTAAGAAAACATAAAACTTGCAGAATCCACATGGCCCAGGAGGGCCCTACTCCGGTTTGCAGGCCCGATGTTCAACAGCAACAGTAACGAAGGAAAGAGGAATCCTTAAAGATGTGAATCAGATTGAGAAGAGGAAGTGAAGTAAAAGCAATCAACAATGGAAAAACTGTATATACTGTTCGGACCAACCTC…
CUFF.22711.2	chr20:59066217-59067952	+	GGACAAGAGCAATCAGCAGGGCTGAGACAGGACCTATAAACGATGCCATGGAGATGAGAGATGCCCAGCAAAGAACACGGCAGATTCTGCATCTCGCAGGCTGCAGTCAAATATCCGGAAACAAACAGATCCTAGTGCATCTGATATCAAGAACAAGCATTAACTTAAGAGTAAAAGCAAGTAAGAAAACATAAAACTTGCAGAATCCACATGGCCCAGGAGGGCCCTACTCCGGTTTGCAGGCCCGATGTTCAACAGCAACAGTAACGAAGGAAAGAGGAATCCTTAAAGATGTGAATCAGATTGAGAAGAGGAAGTGAAGTAAAAGCAATCAACAATGGAAAAACTGTATATACTGTTCGGACCAACCTCTCAGACTTTTCATAAGCCTAATTTTCA…
CUFF.22757.1	chr20:65426611-65427568	-	ACAGGCCACCTCCACATCCTGGAGAATTTTTGCAGGGACGTTGACCAGCTCCCTGGGCTTCTCTGTCGGTGCGTGTGAGAGCTTTTCAGCGCAGGATGTGAGCGTGGGAGCTGACCCGgagctgggcctttgtggggtgacaaggtcatgatggtggagctctcaggaatgggatcagtgcccttgtttcaagacgccccacagggctccctgctcctcctgccctgtgaagacacagtgagaagtcggcgtccgcaaccctgaggccgtcaccagaacccagcaacactggcacctgctctgcacttctggcttgcagaactgtgaaagatttctgttgtttataagctacccatgatatcttgttacagcagctca
CUFF.22937.1	chr21:12013104-12014040	+	TGGAGAGACTGAGACAGGATCCGCCAGAAGATTACACACTATGTACATTAATAGCAAAATCAGCTAGAAGATTGAGAGTTTCTACCATTAGGAAACATACACAAATACCATCACACCCAGAAAAACCCATCGAAGCTGTTTTGTCAAAAGTGTGCCTGAGAGGTTTCGCTCATTTCTCTCTCTGCCTGCCCCCAGCCTCCTTGCGCTCCTTTACCCCTTTCTGTTACAAGATCGCTCAAATTGAAGCCCGGGAGGATCCTATAGGGAATGCATAGGATCCCTGGGAGAAAAAAGCCCCAACAAGCTATACACCAGATGTATAATGTTATATGGTCAAACTGGCAAACACAAA
CUFF.22945.1	chr21:14507552-14519318	-	TGATTGACGATGATTCTGAACAAATATGCTGTTTATTTGAGGTATGCCATTTTGAAGACTGAGACCATGGAATTTTGTCCTTGAGGATAAATCTTTGTGATAGTCTGTATTTTGTATAGCAAGAATATGAATCCTGAAGCTGAATTACCTAAGGGGCCTCTACGGTGAAGTGAAATAGATGTTGGTGGAAGCATTTACACCCAGTCAGCTTGAAGAGTCTCAAATGGACCCTACCACTGAGAAATCAAGATGGCAGTCCACTATGGGGAATTGAGAAAAATGGATTAATACAAGAGTGCTGTGATAATATACAACCAAGACAGGGTTCTTTTAACATGGATTTCATGAAATGAATGAAGATATAGGTTTTTTAACAGCACAAATGGACAGTAAATTTGT…
CUFF.22960.1	chr21:15067266-15091821	+	TGAAGAGAGAGATCAGCTGGGCTTTAAAAGGAAGGAGGGGGGAAACATCCTAGAAGCTCATAAAAGCCACTCTGAAGACTAAGGAGCACGTAGTTGTGGCTGATGCCTGCCTGTGGCCAAGAGCATGGAGCAGGGAAAAAGCAAGTTGTCTGATGTTGGGCAACTTGTAAGGGTCTCTGGAGGTCAGTGTGCTCGTCTACAAACGGGATCTTAGGGAACCTGGATCTACTGTGGAAACTGGTGCAAGCTGGAGGCTATGCACCCCTAAGCAGGAGCGGCTCATGTCGTGAAGCAAGAGGTGAAGCTCGCTGCTGGAAGCTGTCCCacttttcaagATCAGCAGTTTGAAGAGGAGAATCCAGCTGAGTGGCCAGGAAACAGGAAAAACTTCAAAAGCAT…
CUFF.22971.1	chr21:15588675-15597591	-	CAGAGGCAGATGGAAGGAGGCAGCACCACCAGATACCAGAGGGGCCTGAGCTGGGGgtactgaaaccccctccaggtgggagaagttaatgattaatgatggtatgctgccaacaaacctgtagaccccagaccagttagacctgaaggttgacgatgctgactcctgcttacctgaccaccaacctatcagaagaatgtccacaaacagatcataccctctttgagcagttactataaaacttctcactcccttccccaagctgggacacatggttgagggcattagcctactttggccccttttgcttggcaaggtgataaagcccaaaactacttcacccaaaacttggtttcagagattcgatttggcactggtgtgcagagaagctgagctttg…
CUFF.22974.1	chr21:15909737-15912249	+	gagtggtgaggggaaaagcataaagggggttagtccaagagagcatgggagtggagagagaactgaagaattttgtaataaaatgcaaagcaaggtgggggttagaagactcaagagaaggagcttgttgatgtttttgtcttaatcatgggagataaaatgacattttcatgctgcctaaaatgatccagaagagaggaaaaacctgataagAACTTGGAGAGTTACCATGGAAACAGTCTCCCAACCCTTTCCTTTGAAAAGGATCCCTCCAGCCCTCAGAGAAATCACCTGCAAGTAGCCATCCAGCTGCCTTTGTTATGCTCTAAGTCTTCACCCATTATCTGCTGTCAGACTTGGGTCAAGAGCCTTGCCAAAGACCTGTCAAGTGGAACAGCA…
CUFF.22974.2	chr21:15910196-15912249	+	gctgatgatgaggacccttatattgcagacctgaggaaacaagagagtaaggaatcagtagaagggataggatcacatggaagcgatgggagctcagcaagcttgtgaactagaccctggccggtcaacctggAACTTGGAGAGTTACCATGGAAACAGTCTCCCAACCCTTTCCTTTGAAAAGGATCCCTCCAGCCCTCAGAGAAATCACCTGCAAGTAGCCATCCAGCTGCCTTTGTTATGCTCTAAGTCTTCACCCATTATCTGCTGTCAGACTTGGGTCAAGAGCCTTGCCAAAGACCTGTCAAGTGGAACAGCATCCAGAGTGGCTGGTTCAGGCTGGGCCACATCCTGCTCTCCTCCTGGCCTCCTCCTCAGGCCCCTCCTCCACCTGCCCTG…
CUFF.23002.1	chr21:17137794-17143896	+	AGGGCCATAACTGTTTGGAAAAGGGCTCTGCAAAGTAGAGCCAGGCAatactacttggacaaagtgttttgtggtggcagaagttgaagactgtcacctattacatccttttcatggagacctagcaagcaactagcatattacagacttgcagtggtcatggtataaagaaaactctgcagctttgttttactcaaatctttatgaggatgtgtgctatggattcatattttaaaataatgtctattgaacatctggctaaactagcgttttatggaacaaattttgggagctgctTAGAGAATCCTAAAACAAGCAATGCCTGCAACTTACATTGTGTTAAGTCAATCAACCGTCAATCACTTAAGTTAACTCTGGGTCCTGGGGCTCCTTTAGAGG…
CUFF.23002.2	chr21:17137794-17143896	+	AGGGCCATAACTGTTTGGAAAAGGGCTCTGCAAAGTAGAGCCAGGCAatactacttggacaaagtgttttgtggtggcagaagttgaagactgtcacctattacatccttttcatggagacctagcaagcaactagcatattacagacttgcagtggtcatggtataaagaaaactctgcagctttgttttactcaaatctttatgaggatgtgtgctatggattcatattttaaaataatgtctattgaacatctggctaaactagcgttttatggaacaaattttgggagctgctTAGAGAATCCTAAAACAAGCAATGCCTGCAACTTACATTGTGTTAAGTCAATCAACCGTCAATCACTTAAGTTAACTCTGGGTCCTGGGGCTCCTTTAGAGG…
CUFF.23060.1	chr21:21854988-21857959	-	CCTACGGCATGAGAAGGGGGCTCAAAAGTGAGGAACCAGCTAGTGTGGCAGTGGACGCCCTTCTGCATGAACTGACCCATTGACATTCGGAGGGTGGGGCGAGCGGTCTTCCACTTCTCCCGACTCTCTTGCTTTCCACTTCTTCAGCTTAAGAGTACACTTTTAAACATACCAGTatggatggaggagcctggcaggctatagtccatggggttgtaaagagtcggacacaactgagtgactgagcatatacatgcatgtGTTTCTCAAACTTCCTGCAGTTGAAGAGCTGTTTTATTTGAATCCCTGGAAGAATTAACACTAACAAGCAGCTCCTGGTCCCAACACCTGTcacatgaagtcagcgatgcccatctcggtccactctgatcaagatgc…
CUFF.23317.1	chr21:30993863-30996403	+	aggctcaGCGAAGGAGGAGTGGAAGCGGCAGTGCTGGGGTGCGCCATACTCAGCCTCGGTCAAAGGACTGGAAAAACGCCGCCTCTGAGCACCTTTCTGGAGAAGTCTGAGGGCTTTCTGCCTGAGAAGGCACAGCGGACTGAGCACCCTTGGGACAGAGTAATTTACTGGATAATCAGTTACCATCTATTTGTCCTACAGCAGAAGCACGGCCTTGATGGAGAACCCAGGAGAAGGAAGTTTTGATGAGACAGACAGAGAATTCTGGGGACTTCCCAGTGGGGAGATGACTTGGAGCTGGGGCTGATGATTATTGCTTGTGCCCCGTGCCTCCCGGCCTCTCCTCTGCGTtggatcagctcactggatccccaaaccctgctagcatgttaaagaaca…
CUFF.23410.1	chr21:33880952-33887244	+	GAGCGAGTAAGGGGGTAGTCCTGGCCAGAACTCTGGAACCCCGGCTAGTTGCAGACCCCCCTCTTGCCCCACAGATCATCATGGGATTCCTGTCCAGCCTCTGGCCATGAGGTGATTTTTTTGGCTTCTAATGCCGAGGCTCACCTTGCCTTTCTCTCTCACTTGCCGCTCTCATGCAGCCCCGCATTGAAGaaaagaaTCTTggaaaggggctgctgagcgaattaaccgttgattatggccacgtgatgaagcctccataatgatctgtgaaccacagagcttccagcacattggtgagcatgagtgtttgcctaacttctgtgaatcattacgacaaattatttcacctgaggaggcaattgtgagaatgctgatttgtagccaacctggacctac…
CUFF.23424.1	chr21:34146834-34149947	+	TAGCGTCTAAAGTCCTGATTGCTGGGTCACCAGGACAATGCAAGCAGAGACTTTCTCATTGAAGATGTCTTGGGTCAGgaagaggagaagatacagactgacacatagagagaagaacagcatgtgaagatggaggcaaagactggagttatgcagctgcaagccaagtaatgccaaagactgccagtgaacaacagaagctaagagaaaggtatagaatgtagtcctccctggagccatcagagacagcatggtcctgcagacatcctgattttggatatctagcttccagaactgtgagaaaataaatttctgctcttttaaatc
CUFF.23430.1	chr21:34203882-34205242	-	GGCTGGAGCCGTTCCCAGCTGCCTCTCGTTCAGATAGGTTACAACATTGTGTTAGAAACTCCTCAAAGTAAACTCCCAAAAGTGGGGATGGAAACTTAACCCCTTCAGCTTTCTTGGAGGTCAAATTTGGGAAATACGCTCTGGTTCAGGAAACATCCTCAAGTGGAAGAACAGGAGGGATTTATGTTTGTGTACCCTTAGAAACTTCTTACCCCTAACCCCCCA
CUFF.23471.1	chr21:35771069-35778232	-	cttttccacacagagagagatgctgattttggtgcctggcccccttctctggagatactgatttagcaagttggatgtgtggctgtgatgcggggatgtttgaagtcttcccctgtgattcgtacatgctgccaaggttgtgaaccagtgGTGCAGACGTGCTGACTTCGGTTGATCTGCTAATGTTTTTTTCTTGCCCCACACTCGTTTACAAAGTATGTCCTTCTAGAAGGAAAAAGAACAGATGCTATAGTATTTTTTAAACTGACAGAAGAGAAGAAAAAGTGGAAATAACTTCATGCCTGAAATCTCTATTTTGGCCAAGATCAGCTTCAAGTTGTAAAGAATCGAAGAGTAAAGGGAGACCAACAGAATAAACTCATGTTTAAATCCAGCCGC…
CUFF.23473.1	chr21:35778987-35779742	+	ggggtgccattgccgtctccATATCCAAGGCAATAGAGGAGGCTTATTAGAAGAAGAATATTTGTGGGAATAAGAAAACAGGCTTCATGTGAACTCAGGGAGAGTTGCGCAACAGGATACATTCGACCAATTTCGGGGGCACAGCAAGGCATCCAGGCACAGGGATGTGATCTAGGAGCACGGAGGGTGATTCAGAATCAGGAATGGCCAACCAGGCTGACTCATGGCTTGTCCAGCTCTAGGAGTTCGTGGTTTCTTCTACTCCTCTCtcatgtacagatgtgagagttggactataaaaaaggctgagtgcggaagaactgatgctcttgaactggggtgctggagaagactcttcagagtgccttggacagcaaggagatcaaaccagtcaatcct…
CUFF.23498.1	chr21:36310835-36334572	-	tcagtgccagagagatgtggtgtgggaaagaagggactgaacgttgctggctttaaaggtagaaggaagctgtaaagccaagaaatgtgggtgacctctagaagaaggaaaaggcaaggcacgaaagtgggttttctccttgagcctctagaaaggaatggagccctggcgacaccttgattttagcccagtgagacccattttggacttctgaattccagaacaGTCCTGAGAAGTTTCTCATCCCTTCAGATCTAGAGGGCCTGATAGTCAACCTCATATTAAACAGTTGGGTAACTGCCAAATACGTGGCTCCCTGAAACCTGAACCTCAATGAGAAGCCCCTTT
CUFF.23502.1	chr21:36839667-36989990	-	GTGCCGGCAGGCTTATGAGAGACAGTGATGGGGAAGGCAGGGGGCGTCTAGAGCCAGGGTGGCCACAGCAAATGAGTGGATATTCCTCCTTCTGGGGCTGTAGCTGCTTAAGGATAAAAGTGGCACAATAAATAAGGTGGATTTTCCATGGTATGGTTTCCCAATTGAACCGAACAGGAACTTCTACCCTACTCAATTTTTGAGGttttccatctcttccatgaaattgtgagctccactttgaagaagtagcattctgagagggaagggagaaatgtttaaggacccttgaggtctaagctggaagctggcaccatg
CUFF.23502.2	chr21:36891814-36989990	-	GTGCCGGCAGGCTTATGAGAGACAGTGATGGGGAAGGCAGGGGGCGTCTAGAGCCAGGGTGGCCACAGCAAATGAGTGGATATTCCTCCTTCTGGGGCTGTAGCTGCTTAAGGATAAAAGTGGCACAATAAATAAGGTGGATTTTCCATGGTATGGTTTCCCAATTGAACCGAACAGGAACTTCTACCCTACTCAATTTTTGAGGttttccatctcttccatgaaattgtgagctccactttgaagctgcaccttgtgaatgcactacaacgtatccattccttcttgacaagtgttcaagttgtttctagttttgcagttttgtcagcgatgccacagtaaacttcctcacgcgcct
CUFF.23513.1	chr21:37326619-37330597	+	agggaatggcatcccactccagtattgttgcctggagaatcccgtggatagaggaacctggcaggtggcagcccatgggatcgcacagagtagaatatgactgaagctgcttagcaggcaACAGGCTGGTGGAACAAGGCGACCTGTGTGACTGGAACATGGTCTTGTTTTGGCTCCCCAATACCCCCTAGGAGGGCAACTTCTTCAAGGCATGGGAGTGCCTCATCAGGCTTGTGCAGAAAGTGAGGAGCCAGAACCCATAGACGGCCTACAGAAGTGAGGCCCCACAAGGGCGAGGAGTCCCAATGATCGAGGCCGTGAAGCTTGGAGGGGCTCTGGCCTTTTTCAGGACTGTGACTACAATGACGACCGGGAGGCCCGGGCCCACATCTCCAGCCA…
CUFF.23530.1	chr21:37982847-37989614	+	AGcagatggtgactgcagcaatgaaatcaaaagacgcttactccttggaagcaaagttatgaccaacctagacagcatattcaaacgcagagacattactttgccacaaaggtccgtctagtcaacgctatggtttttcctgtggtcatgtatggatgtgagagttggactgtgaagaaggctgagcgccgaagaattgatgcttttgaactgtggtgttggagaagactcttgagagtcccttggactgcaagaagatccaaccagttcattctgaaggagatcagccctgggatttctttggaaggaatgatgctaaagctgaaactccagtactttggccacctcatacgaagagttgactcattggaaaagactctgatgctgggagggattgtg…
CUFF.23545.1	chr21:38622806-38798565	+	AGAACTTGGGTGCAAAGGAAAGGAGAGGAAACTGAGAGAGGAAAATAAGAGAGACTTGACAATAGGAATTATTTTCTGAACAGAAGTTGAAAATATTTGGGATTAGAATCCAGGTTATGGAAGAAATGGAAGTATAGAGATCAGAATCACTGGTTGGAAACTCATCCTTGAAAAGAAAAATGATGAACAGCTCATCTTCTGTGACTGGAGAAAGAGATGGGAAAgtggtcacgtggttatgtgcctgtacaaaacatatgcagctattcatcgaattgtgggcattctattgcatgtgacagaacagaaaaatacatcaaactgctctgtgagaatgaggtcaacaaaatatagactatggaactctacagACGCTATAGACATGCCTGG
CUFF.23545.2	chr21:38622806-38798565	+	AGAACTTGGGTGCAAAGGAAAGGAGAGGAAACTGAGAGAGGAAAATAAGAGAGACTTGACAATAGGAATTATTTTCTGAACAGAAGTTGAAAATATTTGGGATTAGAATCCAGGTTATGGAAGAAATGGAAGTATAGAGATCAGAATCACTGGTTGGAAACTCATCCTTGAAAAGAAAAATGATGAACAGCTCATCTTCTGTGACTGGAGAAAGAGATGGGAAAGCTGAAAGCAGAAGAGGGCAAAGCGCAAGTAAGCATGCAAAACCAGCACACGTCATTGTATTGGCTGAGAACTAATGcttgtgtgtgaacttgtgtgtgaacttgtgAGCTAGCACGTGAGTCAAAGGGTGCCCCATATGAAGGCTGTTAGTGAACCTCCTGTGTGTGACTCTGT…
CUFF.23544.1	chr21:39054010-39227942	-	GTTGCTGTTCTGGACTTATCTCTAAAGAGTGGTGAGGAGGAATGAACTCTGGCTCAAAAGCTACACATAGGAGAGACCCACTGAGGTCAGGAATCATGTTCACCGGTGGGTTTGCTCTTCCTTCCTGATCCACAACTTTGGACGTTAAGGCAGCCATTGAAATGGAAAGATTGAGTGTGATAGCTTGTTGCTAGTGGAAGATGAATCAGCAAACAGAGAAGAACTCAGAGAGATCTCACCAACCAATCAGAAGACCACAGAGAAGTGAATTGAAGgatttccagtactatatgaataaaagcagcaagagacatccttgtcttgttcctgatcatggaggaaaagcttgcagattttcactgGCTGCAGTCTGAAGGGGCTGGAGGATCAGCTACTAGA…
CUFF.23550.1	chr21:39547410-39561842	-	GTCCTGGGTGTTGGAGGTTGCTGTTCTGGACTTACTCCTGAAAGAGGAAATGAGCTCTGGCCCAAAAGCTATGCCGAGTTGAGATCCACTGAGGTCAGGAATCATGTTCACTGGTGGGTTTGCTGTCCTTTCTGCTCCACAACTTTAGACCTTAAGACAGCCATTGAAATGGAAAGATTGAGTGTGATAGCTTGTTGCTAGTGGAAGGTGAGTCAGCAAATCAAGGAGAACTCAGAGGGATCTTACCAACCAATCAGAAAACCACCGAGAAGTGAACTGAAGaaaaggaaatgagagatatcagatatcaagcagacttgctgtttctgattgaagatgaagaagactgcgtggcaaggaatgtgggcaacctctaggagctaagagtggtcctggctg…
CUFF.23552.1	chr21:39674339-39680393	+	GGCGGGCGGAGTAGAGGAGGGCCAGAGGTTTAAAGAAAAAGCTCATTGAAGAAAAATCTTTCTATTTTTTTGTCTTTTCAGGTCACCTTTCCCCTTTCCGAATTCCCCGCACCAGTTCACACCAGCAACTGAGATTTAGGCCTGTTTTCCTGAAGGGCCTCAGCCAGTCCCTGCACTTAGTAGGCATGCAATAAACCTTGAAAGCCCAAATGAATGATGCTGCTTCCCTAGGCACATGAGATTTCTCACATAGGTCAGTTCGATGAAGCTTGATGGCAACAGTTGTTCACTTTGAATCAAAGAATAACTCTTAATTGGTGTGCTGTCATCAACCAGAAGTTTCCAAGTATGTGTCCTCCAATTCAAAGAGAAGAAGCTGGATGCAAGCAAACATACTCA…
CUFF.23552.2	chr21:39674339-39680393	+	GGCGGGCGGAGTAGAGGAGGGCCAGAGGTTTAAAGAAAAAGCTCATTGAAGAAAAATCTTTCTATTTTTTTGTCTTTTCAGGTCACCTTTCCCCTTTCCGAATTCCCCGCACCAGTTCACACCAGCAACTGAGATTTAGGCCTGTTTTCCTGAAGGGCCTCAGCCAGTCCCTGCACTTAGTAGGCATGCAATAAACCTTGAAAGCCCAAATGAATGATGCTGCTTCCCTAGGCACATGGTACTTAGGGGTGAGATTTCTCACATAGGTCAGTTCGATGAAGCTTGATGGCAACAGTTGTTCACTTTGAATCAAAGAATAACTCTTAATTGGTGTGCTGTCATCAACCAGAAGTTTCCAAGTATGTGTCCTCCAATTCAAAGAGAAGAAGCTGGATGCAA…
CUFF.23612.1	chr21:43865673-43870447	+	GAGGAAGTGAAGGGGCACCTACAAGGCATGTATGCACATGTAGAATGTGGAAGTGGTACAGTCTAGTGATAAGCAGAGGATAAACACGAGGGGATGGTGTTGGGTGAAGCTGCAGAGaacttcgccaagtgggtgtctgcactggttcaggacactacaagcaacagggaagccactggtctgaacacagctcatttcatccctgactagaattggccgttatgcacttttttcttatattaaactggaatttgtctccttatgtcttcaatccattggacccaagccctctctgttggctcttaacagactgataacttttccaggccaacgttttaaatgttgggagtactcttcccctaggccttctctctggagcgtcttcaccatctcctcagg…
CUFF.23721.1	chr21:43876777-44135605	+	GCGAGAGTGTGGATGGGGTCTCCGGGAATTCAGTCTGTAGCCAGGCTTCTCTTCGAACCGGAGGTGTCATCTGAAGGGCTTGCTCTTTTAAGAATTGGTGTTATTTGTAGTCAAGGTAGACACAGTAGGCAGCACAGCTGTGACTGCCAGGGAAAGTCACTAGGGGGATATTCATAACAAGGAAATATTGGCAAATAAATGATGAAGAAGGGGAGGAAATCCCCAAGATGTTAAATTGGAGCATTGTCACTGAGATGATTAATGGTGCTGTGTATTTTAGTGAAGATACTTATCTGGATTGTCTTGAAACTATAGTGTACATTTAATAGCACCTATAAAAAGGAATTGGTGCATGAGCACACTGAAGAGAAAAGGCCATGGATCCTGACTTTATTTTCC…
CUFF.23623.1	chr21:44879103-44880244	-	cagaggacgatgaatatggagttcagTCAGACGTGACTTGCTAAACAGCTTCCAAAGTAAAAGTGGTGACATGAATAATTCTGCCTGGAAATAAGGTCAACCTTGTTCTCCTGAGAGCTGCCCTGGGAGCAAAGAGCTACGTAAACCTCGTACCTCAAAGAACTCTGAAACTCTGCCCTCCTCCCTTCCCCCAGTGCTCACACACCCAAGGAATGAAACACAAGACAAGAGACTAAAAATCTGGGTTTTATGGAAAGAAGGAGCATACTGTATTAACTAAAAGATGATTTCCAGGTAAAACTTGTCTTGCAAAAATTAGAAATTCTATAAATGCATAAAATCGGGATATATACAAACAAAAGTATTAACAGGGATTTTTAAAAAATTAATGATGGGATG…
CUFF.23624.1	chr21:45080818-45254611	-	ggcagtggagtggtggtcgtcaggcagagagtgagTAATCACTGAGTGAACTGAAATTGGACAACATCATAATTGCTGTTTCTGTCACCGAGGAGAACAAATTCTGAGGTGGACGTCATCTCTCACGGAGCGGACACCCCATCTCTGAATTAGAACTCAAAGGAAGTTGGAGCAGTCATCAGAAGGTTGCTTGACAAGCCCATCAATACAGCAAAGAAAACTGAATTGTCATAAATGACATTTTATTCAGACCCATTTCTAACTTCCTCTTCTTTTCAGTGAACAGAATTCTCCCCCTCT
CUFF.23624.2	chr21:45133073-45254611	-	ggcagtggagtggtggtcgtcaggcagagagtgagTAATCACTGAGTGAACTGAAATTGGACAACATCATAATTGCTGTTTCTGTCACCGAGGAGAACAAATTCTGAGGTGGACGTCATCTCTCACGGAGCGACAAGAAAATATGGCTGGTGTGATGGACAAACTCAGCTGCATTTCTCTTCTGATCTCTTTCCTGGCCTGTTTATATAAATGTATTGTCACGGATCATGTGACCCTGTGCTAGAGAGAGAGGCTTATCTAGAGCCTGGCTCTGGAGACTTTCTAGGTGACTCGTGTGCTGGGGATTTGTTTGGCACGGGCTGTTTGATGCCCTGGGTCAGCTGGTTGTGCCTTAGGCAGGATCGTAGGGGACATCAGATCTGGCAGGACCTTGAGAAG…
CUFF.23676.1	chr21:46558949-46617020	+	GTGATAGGGGGACTTAATTTTGGACTATTCTGgtggtggtctcattttaccgcagaaaactaaggcttggtgatcctgttacttgtggaaggtctgagcagcaagcttggaaggcagtgggaatatgttgaagaacaagaaaatgtccttgccctcagggtgcttacattctGCAAAAGGCTCTCCTTTTTACATTACAAAACAAGTGGATTGAGTGAAGCAGAAACTGCTGCTAAATAAAGCCTTTTCTTGGCGTTCCTTGGAGAAATCAAGTCCAAGACCAGTGGTGAAAGGTGATTGTACTATATCCACTACACAGACTATTTCTTCTAATTATCAGCATGAATGTAATTACTTACAAGCATCTCAGGCTCCTATGATCATGTCCCTCAGAGCATT…
CUFF.23676.2	chr21:46558951-46830251	+	GATAGGGGGACTTAATTTTGGACTATTCTGgcagtgggaatatgttgaagaacaagaaaatgtccttgccctcagggtgcttacattctGCAAAAGGAACTAATGGAGTCTTTGAATAGCTGCTTCAGGAAGATAATGAAACTCATGATTTAGGGCTGTAGAAGAACCCACGGGAGGAAGTTTCACATTTGGTGAAAGGATCAGCATGGTTAGAATTAGAATGATGACAGCCCACTTTGAAAATGTTCATTTATTCATAGTTCATCTACTTCTGTGAAGGCAAGTTACACTAGAAACGGAGTTCTACTCAGAGAGTCATTAATAGAAGCTGGAAGACAACC
CUFF.23718.1	chr21:48478540-48479678	-	CACAGGCCAGAATAAACTCGAAGGAGGGAACACTTTGTAGCGGTGGCACCTGGTCGGGAGACCCAAGCTCCAGTTTAGACAGGAAAAGGGAGCAGAGCctttgggccagccactctctcaccaacagccttgattccatcgcgagggccacacacagaggcctcgcatccagcccttcaaaccagagttcccaggtccataggctgccactgacacagccaaacgactgccgacgaccaggcacagcactc
CUFF.23720.3	chr21:48491435-48570018	+	TTAGACTGGAGagaatatataaaggcttggatgggcagtgtgtcctctaacaatattccttcagtgtttaatctcgacctcatgatgttggacggcagctgattcaatacggtgctctctcgcaaggcctggCAGGAGGCACAATCCTGGGAATCTTTTTTTTTTTTTATTCAGAGTAGGGTTCAGGGAATGGTAGCTGCTGACTGAATGGTTCTGGAAAGGCCCAGGTCATCTGAAACAAGCCAGTTCATGAGGATATTTAGTCCATAGCACTTCTGGTCTCCATCCAGTGACAGGGCTCCCTGAGGAGTCAGTCAAAGCTTCGCTTCCATGCCTGACCAGTGGCCCATGAGAGacagaagaggataaaacattttcagctcataaaatacagaggat…
CUFF.23720.2	chr21:48491435-48589973	+	TTAGACTGGAGagaatatataaaggcttggatgggcagtgtgtcctctaacaatattccttcagtgtttaatctcgacctcatgatgttggacggcagctgattcaatacggtgctctctcgcaaggcctggCAGGAGGCACAATCCTGGGAATCTTTTTTTTTTTTTATTCAGAGTAGGGTTCAGGGAATGGTAGCTGCTGACTGAATGGTTCTGGAAAGGCCCAGGTCATCTGAAACAAGCCAGTTCATGAGGATATTTAGTCCATAGCACTTCTGGTCTCCATCCAGTGACAGGGCTCCCTGAGGAGTCAGTCAAAGCTTCGCTTCCATGCCTGACCAGTGGCCCATGAGAGacagaagaggataaaacattttcagctcataaaatacagaggat…
CUFF.23720.1	chr21:48491435-48659377	+	TTAGACTGGAGagaatatataaaggcttggatgggcagtgtgtcctctaacaatattccttcagtgtttaatctcgacctcatgatgttggacggcagctgattcaatacggtgctctctcgcaaggcctggCAGGAGGCACAATCCTGGGAATCTTTTTTTTTTTTTATTCAGAGTAGGGTTCAGGGAATGGTAGCTGCTGACTGAATGGTTCTGGAAAGGCCCAGGTCATCTGAAACAAGCCAGTTCATGAGGATATTTAGTCCATAGCACTTCTGGTCTCCATCCAGTGACAGGGCTCCCTGAGGAGTCAGTCAAAGCTTCGCTTCCATGCCTGACCAGTGGCCCATGAGAGacagaagaggataaaacattttcagctcataaaatacagaggat…
CUFF.23745.1	chr21:49813414-49816488	+	GGAGTGCAGAAGATGGGGAGAAGCATGTTCAGTCGAGTGTGATAATCCCTATTGCCCAAAGTGTCAGGAGTTGAGTCGGAGTAACTGAAGCTGACAAGTCTGTTGATGATAGGTAATCTGGAggaggaaagcagtatcaagatacaagtctgagaaaactcaggtctcaagaaattgtgccatcaaagggagaagagaactgtggcagcaAGTAAAATCTTTTATGAAGATTGATGGTGAAGGCTAATTGAAAATGCCAGTGTTGGAACCCCACCCCCCTCCTCCTTCCCATTCATCCTGAGCCCAAGAGATCTCCATAAAATTGACCTGGATGCCTTTCATTCAAGGTTTGTGGGAGTCTGAAGCCCGTCTCAAGATTTCTCCACTACACTGAGCCAG…
CUFF.23757.1	chr21:50577749-50637597	-	GCTTCTCTGTATCCTCCTTGGCGTGGGGATCTGCTGCTGCCTGTGGGGTGCATCATGGACATGCTGCCGCCGCACAACAAAAATGCGTGTTGAGAATTGCAGAGTAAGAAAGGAAGGCCAGAGATACCTGACACGGAAGACCATGCAGGAGAGAAACCAAAGCTGGCAAAAGAGGAGCTCGCCCAGGTCCCAAATCAGGCCCAAACAGAGGGCCTTCAGATAAGTGTGAGGAAAGAGGagttagttagttagttagttagttagCATCCACTCCCTGGAGACCATGGCAGAAGACAGCAATGACCAGAATCTGTGATGACCTCATTCTCCAAGTTGGAGATATGACATGGGAGTCCGGAAACTGGGAAAGTGGAGCTGAAATCAATTCCATACTATTAT…
CUFF.23775.1	chr21:52104218-52112515	+	agatgggggaacacttggagatttggggagagggacatgctgggacaaagcatggaaaccccaggccttttccccacaccttgtgctttgcgactcttccatatggctgttcctgagttatatcatttttgtaataaaccactaacctcctgatgaaaaggttttctgagttctgtatgctgctctcgcaaattaacggaacccgaggatggaaactgtaatctacaacaggttggtcagaagaacagGTATCCTCTTCTCCTGAAGTTGGATTTTGATACTAACACTACTCTAAATCAGTAAAACAGAGTTACTCTCAAAGATGCAATTTATAACAAGGGAAAGAGGTAACATCATCAAGAATAAACACTGCATTATCAAAATGAAGCTCTACTCTTC…
CUFF.23786.1	chr21:52615602-52693715	+	ttccagatgttccttgtttctgatgaccttgacaactttgaggagcactaaccagAGCTTAGCAGTGGGACACAAGAGTGTTTGCTGCAGTAGTGAAAAATCAATATGATTACCTCTTTGCCACAGGGCTACATCTAACTACAATATCCTGGACACCACATATCAGCATCACTCACGGTTAATGCTGCATTGCAGATGGAAGCTGAATGAGAACAAATAGCAGTGACATTTCTACCCTCGAAAAAGTtgctgctgctgctgctgctgctactaactcacttcagtcgtgtctgactcttcgcgaccccatggactgcagcctaccaggcttctccatccatgggagtttccaggcaagagtactggagtgggttgccattgccttctccATCGAAAAAG…
CUFF.23786.2	chr21:52615640-52693715	+	tgaggagcactaaccagGGCTACATCTAACTACAATATCCTGGACACCACATATCAGCATCACTCACGGTTAATGCTGCATTGCAGATGGAAGCTGAATGAGAACAAATAGCAGTGACATTTCTACCCTCGAAAAAGTtgctgctgctgctgctgctgctactaactcacttcagtcgtgtctgactcttcgcgaccccatggactgcagcctaccaggcttctccatccatgggagtttccaggcaagagtactggagtgggttgccattgccttctccATCGAAAAAGTTACACATGGCATTAAGATTTGACACAGATTGCATTAAAATGAAGGAAATGGTTGTCTTTGTGGTATGAAATTAGAAACTGACTTGTTATTGCTGCTTTTGAGATCAGA…
CUFF.23836.4	chr21:54332886-54344746	-	tgaggggcaggagagtcagtgtcagagtgggaagaagggagcaaagagctaagaaattcgggcagcctctagaagctgggaaaggctacatagagttggaagttttttggtctaATTTTAAAAGCTTCAAAAGTAGACGTGTTggaaatatttaggaagatgggctcaataaaggacagaaatggtatggacctaacagaagcagaagatattaagaggtggaaagaaaacacaaaagaactgtacaaaaaagatcttcacaaccaagataatcatgatggtgtgatcactcacctagagccagac
CUFF.23836.5	chr21:54332886-54344746	-	tgaggggcaggagagtcagtgtcagagtgggaagaagggagcaaagagctaagaaattcgggcagcctctagaagctgggaaaggggatcttccttacccaggacctggaagcagatatcctgcattcgaggcagattcttcgccttctgagacaccaaggaagccctatgTGAATATATGTGCCCAGgagatcttcctgatccagggatcgaacctgtatttcctgagactcctgaactggctacatagagttggaagttttttggtctaATTTTAAAAGCTTCAAAAGTAGACGTGTTggaaatatttaggaagatgggctcaataaaggacagaaatggtatggacctaacagaagcagaagatattaagaggtggaaagaaaacacaaaagaact…
CUFF.23809.1	chr21:54367603-54586183	-	GAGGGGGTGTGAGTGAGTGAGTGCACGTGTAATagagagagggaaagagaaagaaagaaacagaaagaAGACGGAAAATAAATGTAGTTTAGCTAGTGAGCTTTGGAAATCTTCACTGGTTAAATTTCCTCTGACTGCAGAGCCCCATGGAGTCACTGTCTCAATGGAAACTGCTAGAAGATGCTGAATTCAGAAGCTCCTCCTAAGGCAACACCAGgagaaagaccatgtgagaatgcaaaagggatgcaccgtggaagcttcctccttcagaaaagaacagttaatttccattccagggaagagcagctatatgattctggatgcaacacctgttaacaGAAATAGGAGGGCAGAGGATTGTCAACAACCCTTTGGAGTGTGTGGTGTTCTGTCCAT…
CUFF.23809.2	chr21:54401130-54586183	-	GAGGGGGTGTGAGTGAGTGAGTGCACGTGTAATagagagagggaaagagaaagaaagaaacagaaagaAGACGGAAAATAAATGTAGTTTAGCTAGTGAGCTTTGGAAATCTTCACTGGTTAAATTTCCTCTGACTGCAGAGCCCCATGGAGTCACTGTCTCAATGGAAACTGCTAGAAGATGCTGAATTCAGAAGCTCCTCCTAAGGCAACACCAGgagaaagaccatgtgagaatgcaaaagggatgcaccgtggaaggatgctgcaattccccaggatgagccatgtc
CUFF.23809.3	chr21:54584846-54586183	-	GAGGGGGTGTGAGTGAGTGAGTGCACGTGTAATagagagagggaaagagaaagaaagaaacagaaagaAGACGGAAAATAAATGTAGTTTAGCTAGTGAGCTTTGGAAATCTTCACTGGTTAAATTTCCTCTGACTGCAGAGCCCCATGGAGTCACTGTCTCAATGGAAACTGCTAGAAGATGCTGAATTCAGAAGCTCCTCCTAAGGCAACACCAGTCTGGGAATTATGACCTTGTactgcagccatgaa
CUFF.23965.1	chr21:57541740-57544813	-	tccgttgcaAAGATGTTAGAACACCTGTAATTAAAAGCAAACCCTGATTAGTCTGCGTGAGGGCAACTTAGTTTCTTCCTCAAATCCGAGGCAAATTGACTTTCCTCCGGTGGGCCAGAAGGAGAAGCACCTCCAAGcagggacacagggagaatcctgtaaaagcactgatgacattgccattaatgccaagagagttcaacatgactgatggctccaataaacagccagcgaatcagaagtgattgattagtcttctctttaaagcgtggccaaAAACTGCCTCGGCCAGCATCCTTGCATTTTCCACCGGTGAAAAATGCACGTTCGAATAACGTCAGCTGTATTAAATGATCACCCTTCTGCAAATCAATCTGCTAATACCTGCCCAAGATGTGA…
CUFF.23965.2	chr21:57544181-57544813	-	tccgttgcaAAGATGTTAGAACACCTGTAATTAAAAGCAAACCCTGATTAGTCTGCGTGAGGGCAACTTAGTTTCTTCCTCAAATCCGAGGCAAATTGACTTTCCTCCGGTGGGCCAGAAGGAGAAGCACCTCCAAGcagggacacagggagaatcctgtaaaagcactgatgacattgccattaatgccaagagagttcaacatgactgatggctccaataaacagccagcgaatcagaagtgattgattagtcttctctttaaagcgtggccaaAAACTGCCTCGGCCAGCATCCTTGCATTTTCCACCGGTGAAAAATGCACGTTCGAATAACGTCAGCTGTATTAAATGATCACCCTTCTGCAAATCAATCTGCTAATACCTGCCCAAGATGTGA…
CUFF.23968.1	chr21:57548014-57551975	+	AGGGTGCAATTTTGAAGGATAAAGAGGCCTTGGGAATCCTGCATGAAAGTGAAGATCTGTGCAAATTCCTGCTGCATCAGTTCAGACCTTAGGATGTGGGaggggacaaggggacaaggagacccaagagaagtctgttgcaAACGTTAGTCACAGtccacacaaggggatatacttctcagcaacaaaaaggaacaaagtgaaacctactacaacatggaagaacctcaaggacaccctgctaaatgaaagaaatcagacacaaagaccacagactgcatgattccacttacatgaaatgtccagaaaagatgtgatggaatgttctaaaatgagattgcggtgatggttatgtaactataaatttactcaaaatcattgggttgaaccagagtgata…
CUFF.24031.1	chr21:60876124-60877089	+	AGGTCATGGTGCGATATTTATTATGCAGCTGGTATCTCGGTAGACAGAGACAGCATGTCTCTTTACATGTGGGTTCCGCCTTTAATTTACTTGTACAATTCATTGTTATCATTCTATTTTCCTATTAATCTTTTGTGAACTTCCCAAATATGTGACAAAGTATGTACAGTCTACTTTTGAACTATTTTTATCACAGTATTATTTATTGCTTTCTTTCAATAAAGTACTGAAGCAAAATTTCCCAGGGCCAATAAAGAGTGCTGAGGGTAAGCTGTACTCTCACTGAGAACAGACCAGAGCTGGTAACGGGAGCCCGTGTCATCACAGGGACATTCTGTTAAGAGAAACGGACGGATGCAATGGAAAGGCCAGAAGGCGGAAGCATAGGTGTCCCTAGAG…
CUFF.24047.1	chr21:62200669-62201724	-	ttttgattggtcctcaatggattggattggatgatccccacccacactggagaaggaaagctgctttactcagtctacagatgcaaacgctagtctcatacagaaacaccctcacagacactcccagaatcatgtgtgagcccaggtctgggcactcgggcctagtcaagttgacacataaaagtaaccagcaTGACAGGGGACATTGAATTTCCAAGGATGACAAACGAATGGGGCCAAGACAGTAAAGGAAGAGTGAGGTCAAAGATGCCGCAGACACGTCTATAGCGGTGTTGGTATGAAACTGTATGTCAAGTTCAAGTTGGATCAGACCAGTCATTTATTTTCTGAGAAGCAATCACAAGCAAGACTCTGGCCTGCCCACCAGAAGCCCAGCTC…
CUFF.24047.2	chr21:62200669-62201724	-	ttttgattggtcctcaatggattggattggatgatccccacccacactggagaaggaaagctgctttactcagtctacagatgcaaacgctagtctcatacagaaacaccctcacagacactcccagaatcatgtgtgagcccaggtctgggcactcgggcctagtcaagttgacacataaaagtaaccagcaTGACAGGGGACATTGAATTTCCAAGGATGACAAACGAATGGGGCCAAGACAGTAAAGGAAGAGTGAGGTCAAAGATGCCGCAGACACGTCTATAGCGGTGTTGGTATGAAACTGTATGTCAAGTTCAAGTTGGATCAGACCAGTCATTTATTTTCTGAGAAGCAATCACAAGCAAGACTCTGGCCTGCCCACCAGAAGCCCAGCTC…
CUFF.24070.1	chr21:63692247-63696551	+	gggagggacagaatgtgatattaaagagtgcggtcagggcaggtcttattgaaaagggagcaagggtataaaggaccgtggaagggagccaagtggttatccaggggaggaacattctagaaggaaaagccagtgaataggctctgagttaggagtgtatggtgcagtggaggaatagcacggaggccagtgtggctgaagACTCATGTAATTTCTTCTTGAGCGTGGAAGGAAAAGTCATCTTTTGGTGAGGACTTCTGCTGCGTGCTGGTTGCTCTTGCGGTTTCGAGAGGTTGGACTGTTTTAAAGAAGAATAGAACCAAATGAAAACTATATGCGAAGGAAT
CUFF.24263.1	chr22:5911463-5927113	+	GACGTGCTAGGAAGGCTGTGAGGAGCCTCGCTGGCCCCAGGAAGAGGTTTGGGGAGGATATTCCTAGCAGCTGCCTAAAGCATTGGTTTCGGGGGTCCTTCCTGCTTCTCCTCTGCTCAGCACTGGCTGCCCATATGTGCTTTTCCTTGGTGGAATGAGAAGACACCTCTGGACAAGCTGACGAGCTCCCAGACCCACTCCACAACTAAGGATCTAAAGCAGCAAAGAAAGTTAGAAGGCTAAGAAGGCTATCTACTAGAGAAACTTTCGAGGTTGCAAAATGGTTCAACTGCCAGCACCTTTTGGGAAAGTCACTGAATTATATACAAAGAGTTTAACACCGAAGAGTTTAAGACCTAAGCATCAAGATGAAACAAAAAATAGAGAAAAAAGAAGACC…
CUFF.24340.2	chr22:9920978-9923118	+	AAGGCTGCATGAGACGCAAAGGTGAGGCGCACTGGAAGATTAAGAGGTCCGTGCTTCTAGTATGTTCGCGCTGTGTGTGGCTTAAGACTCGGGTTGTAGACGCTCACACCAGGCTAGTGGTCTGGCAGGAACGTTGACCTTAGAGAAATCTTTCCAGGTGCCTTTCCCAGTGGATGGGAGTCTAAGTTCTGCACCCCCAGGAACCCTGGAGAATGGAAGCTGGAGAGATGGAGAAGTAGACCCAACACAGAAGAGGACCATCCCTCACCACCATCACCAGCCTTCCTTATGGTgtgcttccggtacattatctcctttaagactcacttagtcctgcacctgagttagccttggtgtctgagaggaagttgaagatcagagacatgagacactttcaaa…
CUFF.24340.1	chr22:9920978-10043593	+	AAGGCTGCATGAGACGCAAAGGTGAGGCGCACTGGAAGATTAAGAGGTCCGTGCTTCTAGTATGTTCGCGCTGTGTGTGGCTTAAGACTCGGGTTGTAGACGCTCACACCAGGCTAGTGGTCTGGCAGGAACGTTGACCTTAGAGGTGAAATCTTTCCAGGTGCCTTTCCCAGTGGATGGGAGTCTAAGTTCTGCACCCCCAGGAACCCTGGAGAATGGAAGCTGGAGAGATGGAGAAGTAGACCCAACACAGAAGAGGACCATCCCTCACCACCATCACCAGCCTTCCTTATGGTgtgcttccgggaaacaagcctgctcaagataaaaaaatcttcaagacctctcaccatagactttgagaggccccacatgtaagtggcccagcctccgcctggt…
CUFF.24424.1	chr22:12750929-12752470	+	GACAAAGGAAGATGGTCTTCAGGGTGTCCTACGCTGAGGTTAAGGGCAGCATGATGTCCTGGAGAGCTGCCTGGAGAAGGTCCTGACTTTGAAAGCCTTTCTGGTTGCCTAGTGTGCTGCTGGACCTTAGAAGGAGAGGAGCGGGCGGAGAGAGACACCCCTGGATCGAAAAGTATAGAGGCAACATCGTGAGGCCTGCATGGCTGGAAGAAGAGAGCCGAGGGGTGCCATCAGATGTGTTGTGTGGAGGGACGTTCTGGGGACACTGAGGGCAAAGACAAAATTCCCAGGAAATAGGAGGCACATGACGGCAGAGGTGGAGAGGTGGGCAGCAGTCTGTTCCTGCCGGATAGGAGAGCGTGGTGCAGACTTCAAAGTCATCTCACTTAAAGCCTGCTA…
CUFF.24478.1	chr22:14742284-14752086	+	ACCGCGGTGGCGCGCGGCTTGCCTTCCCGCAGGTGAACTTTGATATGGTGGATGGTGACTCTTCTCCTGCATGCGAGTGGTGGTTCAAACCCTCTAAACGCAAGGCTGACTGATCCCTTCAAGAGCGGCCTTCTTGAGcagcattgttcaatggaactttctgcaatgacaggaatgtttgctttccgcaccatcgggtacagagccacacgccatgtggagctactgagcacttgaaggtggctagtgtgactcagaaactggcct
CUFF.24510.1	chr22:15423581-15424338	+	GATCCTGGAAGCTGCTAAGGAGGCCTTAAATGCCTAGGCCATGACGTTTATGCTGCTGGAGGGAACTGGGCAACCTGCTGGTTTGAATTAGGCCCTACCATCTACAGCTGTAGCCTATTAGTGCTGAGCTCTGAACAGGAGCGATCTACTCCCCTCCAACCCCCCACCCAGGGATCAATGCTCCCTCAACCTACAGAGCCCTGGGTCCACACCTAGTGGAAAGCCTGCCTTGACCAACCCTGAGAGGAAGATCCTGTGGCACGGACCTTTTCAAGGCCAAGGGAACAGAACAATTCTGCCTATCTCCATCCGGCTACTC
CUFF.24554.1	chr22:16210128-16219882	-	ATAGCCACCCCAAGTTTTCTTAAGAACCCACCTAGCATATTTTTTGTAGTCAAAGAAGTAAAACAATGCATTGTTGCTCAAATGAAGCCTCCCTCATGCAGTGAGGGGCAGGGGAGTGGAATTATGGGTGCCCCTCCCTCTAAGGTTTCCTCGAGCAGCAAATCCAGCCATAGGTTATAAAAACTTCTCTCTGGGCAGCTGCAGCCTCTGCCTTCATGGGTGGTGGGGGAATCCAGCCTGCGGCCTAGAGTCCATTTTGAAAATTGCTGTTGATGCGAGCTTTATGGCCTCCAGAAGAGCGTTTGCCATGGGTGTTGATCAACCACTGTGTCCTCATCAAGTCACAAGGGTTTCACAGGAGGATTATTAAGGGGTTGGATCTTCTCACACACGCCACTT…
CUFF.24653.2	chr22:17915477-17922490	+	GACGGCCGAGGTCTCTGAGGTCACTCACTGTTGGCTCCTCTGACAGTCACAAACCCCTGGGTATCCTTCCGGAGAATGCGGCTCCTCTGTCTAGCCACAAGTCCCTCTGGAGCCCCTTTGGCAGAATTCACTTTGTATTTATCCCTCAAGAATTCATCGACACACATTCCTTTAGGAGGAGTAACTTAAACCAGGGGCTTTGCCTCTGGCCTCTGAACTAAAGTGCTGATTGAGTGTGGGGTTGATTTTGCTTTTTGCTGGGTCAGTCTCAGTTCTGGTGTGTGTCTGCTAGCATGGGCCTTTTGTGGAGCTGAGTGATCTTGAATTGTTGAAAGATACATGGAAATTTGCTGCCATTTAATGCCACTCAGGCAAAAGCATACAGAATTTTACTCCTCa…
CUFF.24653.1	chr22:17915477-17936864	+	GACGGCCGAGGTCTCTGAGGTCACTCACTGTTGGCTCCTCTGACAGTCACAAACCCCTGGGTATCCTTCCGGAGAATGCGGCTCCTCTGTCTAGCCACAAGTCCCTCTGGAGCCCCTTTGGCAGAATTCACTTTGTATTTATCCCTCAAGAATTCATCGACACACATTCCTTTAGGAGGAGTAACTTAAACCAGGGGCTTTGCCTCTGGCCTCTGAACTAAAGTGCTGATTGAGTGTGGGGTTGATTTTGCTTTTTGCTGGGTCAGTCTCAGTTCTGGTGTGTGTCTGCTAGCATGGGCCTTTTGTGGAGCTGAGTGATCTTGAATTGTTGAAAGATACATGGAAATTTGCTGCCATTTAATGCCACTCAGGCAAAAGCATACAGAATTTTACTCCTCa…
CUFF.24661.1	chr22:18133285-18162237	+	AGTGGCAGCTGGAGGTGGGAGAATGTTCCTTGCATAATGAAAGTGACTCTTATGGATCCAGCAGAGACTCCAGGTCAACAGAGAGGCCACGTCTCTGGAGGGGACTTTGTGGAGATTACAGTGGTTTAGAACAGCATTGAGAGTCTTCCCTTTCCCCACGCACCACTTCTCCTTTCATTAATATCTGCTTTGCATAAGGACACCTGATTACGTCAGTCACTTAACGCAGAATAGGTGAGGAGTTGGGGTCACTATTGTAGTTCCATAAGATCGCTAAGAATTTCAGGGATGTAGTGTTGAGTTGTTCTTGTTTGTCTTGAAGGGTTTGTTTTTTATCCCCTCCAGATTATTTAATTTACATAATTtggctaaccaaccaggacctactgtatagcaaag…
CUFF.24661.2	chr22:18133296-18409351	+	GAGGTGGGAGAATGTTCCTTGCATAATGAAAGTGACTCTTATGGATCCAGCAGAGACTCCAGGTCAACAGAGGTGTTTCAACTACATGGAAGACGTGAAGAATTCTGAGAAAACAGAGCCCCATCATCTGCAAAATGATGTTTCATCAGCCTGGAGTTTTATTTCTCTGCAAGAACTCTTAAGTCCCTGGAGCTGTTTTAATCTTGCCTCATT
CUFF.24661.3	chr22:18156222-18170018	+	gtgtggagaggcagtgaacgctgggaaaagagggctcaccagtaaccacccctgctggcctcttgaccttggacttgcagcctccagaactgtgaaaggatacatatttgttgtttaacccccctagactCTCACGGAGGCTGGAGCCGACTCAGACGACAGCCATAGAGGCTCACTTATTTTCCAGGGGACTGCAGGTGTGCTGTGGGGCTGGGTACTGTAGATCATAGCAGTGAAGGAGCCTTGGTCTCCACCCCTGATGGTTATGCCAAGTGACCAAGGAGAGTCCTTAAGATGTTTGGGCCTTGAAGGATGGGTAGGAACTTGCCAATTAGATGATGGGA
CUFF.24661.4	chr22:18156222-18258891	+	gtgtggagaggcagtgaacgctgggaaaagagggctcaccagtaaccacccctgctggcctcttgaccttggacttgcagcctccagaactgtgaaaggatacatatttgttgtttaacccccctagactCTCACGGAGGCTGGAGCCGACTCAGACGACAGCCATAGAGGCTCACTTATTTTCCAGGGGACTGCAGGTGTGCTGTGGGGCTGGGTACTGTAGATCATAGCAGTGAAGGAGCCTTGGTCTCCACCCCTGATGGTTATGCCAAGTGACCAAGGAGgactagtcatatgaatcccatgccgccttctgcatgtcttactctactcatctgcatggatggaggcaaggagcgccaaagcttagaagagaatagtggGAGACAACACAACTCC…
CUFF.24685.1	chr22:20592966-20596344	-	tttcagtcagtTGGGTCCTTCTTTTTCGCCACTTATTTCTTCAATAATATATTAAGTATGTGGTATGTGATGAAGGCTTATGTGTTAACTAGTTCTGGGATGCCAGCAGCAGGATGCAGAATTCCAGGCAAGAGGAGGCTCCATGGCGACAGGAACAGGGCATCACCAAACAAAGTGAAAGACTGTTTCGTGGAGCTTTGGAACTGGAGTCCAGGCCTCTCTCTACCATTACAAGGCTCCTTCTGTCTGCACCAAAGAACCAACAAGGATCCAGGACTATTGAGGGGGAAAAGAGTTTTCTCAGAACTGTCTAGCTTCCAGCTACAAAGCAGGTTTAGGGATATGATAATATGATCAGGTCCTCTATGTCTTCTAACTTATGATGCTCACCATTTAAAA…
CUFF.24730.1	chr22:21057086-21165564	-	AGGCAAACTCTACTAGTCTGAAAGTTGTGGCGGCGAGACAGGCGTGAAGCTGGAATGTGGATGTAGGTTTTCTGGCCAGTGACCTGAGCTGCTGAGTTGCGACAATAGCTGACCCTACCTGACCCTACCTGCAGCAGAGAGGTCCCTGTGGTGTCAGCCAGGACTTGTGAGCCTGTCCCACCTGAAGGTCCACGTCTCTGAGAGTCATCCTTCATGGAGCGGGGTATTTATTCATTGTGGAAGCTCAGATGATGGACCCAGATGTAACCTCAGGATCCTCTTTATTACAGCGTCTCAAGGACCCCTCTTTCCAAGTTCCCTTCTCAATACAGCCAAGAGGCTAGATCTCATCAATAAAATGTTGCTGAATTGAGGACGGCATGAAGAGAAAGCTGTGTT…
CUFF.24730.2	chr22:21117732-21165564	-	AGGCAAACTCTACTAGTCTGAAAGTTGTGGCGGCGAGACAGGCGTGAAGCTGGAATGTGGATGTAGGTTTTCTGGCCAGTGACCTGAGCTGCTGAGTTGCGACAATAGCTGACCCTACCTGACCCTACCTGCAGCAGAGAGGTCCCTGTGGTGTCAGCCAGGACTTGTGAGCCTGTCCCACCTGAAGGTCCACGTCTCTGAGAGTCATCCTTCATGGAGCGGGGTATTTATTCATTGTGGAAGCTCAGATGATGGACCCAGATGTAACCTCAGGATCCTCTTTATTACAGCGTCTCAAGGACCCCTCTTTCCAAGTTCCCTTCTCAATACAGCCAAGAGGCTAGATCTCATCAATAAAATAGTTGTTATAAAAAGGGCAGAAGACTTGAAGGCAAAATA…
CUFF.24730.3	chr22:21117732-21165564	-	AGGCAAACTCTACTAGTCTGAAAGTTGTGGCGGCGAGACAGGCGTGAAGCTGGAATGTGGATGTAGGTTTTCTGGCCAGTGACCTGAGCTGCTGAGTTGCGACAATAGCTGACCCTACCTGACCCTACCTGCAGCAGAGAGGTCCCTGTGGTGTCAGCCAGGACTTGTGAGCCTGTCCCACCTGAAGGTCCACGTCTCTGAGAGTCATCCTTCATGGAGCGGGGTATTTATTCATTGTGGAAGCTCAGATGATGGACCCAGATGTAACCTCAGGATCCTCTTTATTACAGCGTCTCAAGGACCCCTCTTTCCAAGTTCCCTTCTCAATACAGCCAAGAGGCTAGATCTCATCAATAAAATAGTTGTTATAAAAAGGGCAGAAGACTTGAAGGCAAAATA…
CUFF.24726.4	chr22:21461759-21475435	+	tTTAGGGCCATGTGAAGAGTGAGGCCTCAGTTTCAGGCAGTCTTTCCGCGGAGCTCCCAGCAGAGTGAGCTTCAACTCACAGCTCCAGCGGCATGGAGAGGAGGCCTGGCACTGAGCTCtccagcttgagatgtgctTGTAGGAGTCTCATGAAATGAGGGACGTTGCCTGCCCGAGTCTCTGGGACCAGCGCCTGGCATGAGAGACCCCATGCGAGTGTGAGGCCTGACCCACATCACTTTGTGCGAAATGAGAGGATTGACAAATGAATGAGCAGATTGCTTTTACCCATGGGGTAACATCGACTGCTGCCCACCTC
CUFF.24773.1	chr22:25687512-25690261	+	AAGACGAGGGATTATTGATTGAGAGCACATAGTTAAAAGGGAGGCAAAACATTGCTCACAGGTGTGAGGATACGTTCCTCACAGAAAGGATGAGCTTCAGGAAGGGTAGCTGGGAAAGAGGAGGTGGTGGAGGCAAGTGCTTTCAAGGAAAATCATGACCATCTTTAAAGCCTACTGTTGGGTTCTAAAGAAGAGGAAATAAATACCCTGGttttggagaactgatgtctgaaatggatctcactaagctaaagtcactaagactaaatgggtctcactaagctaaagaccaggagctgactgtg
CUFF.24961.1	chr22:31295868-31321291	-	GTCAGCAAAGAgcagagggaccaccagtgcacggtctggagatgggagtgagcttcactgttctgagtccaagcaaagcaaaaacataaaaTTTTAAAGAAGTTCTCCATGCCTTTTCATGGAAAAATAGGACCAAGATGCTTTATGACCTGTAAGGATTTCAGTTCTGGAAATACTGCTGCATCCTTAGAGGAGGAGATAGACCTGGAATAAAACTTGGAAATGTCTCTGAATGCTTCTAAGGATTCTTCATAATACTGAAACTTCCAGACTGAACTTGTGAGGAGAAACAGTCAGTGACTTGGAAATGGACAAAAGAGATTATTGTGCGTCTTTCTGCAGACTATTAGACGCTGTTTAGCAGCCTTCCTGATGTGGGATTATCAGATTCTACAGGCG…
CUFF.24902.1	chr22:32712305-32716120	+	CTGAGGGGCAGAGTCCTGAGGTCTGGAAATCTAGAGAGGATTCATGGCTCTGAGTATCCAGCAAAGTGGCCCATTGCATATTATGGGCTTAACAGTAAGAAGAATGCAAAACAGGATTCAGAGAGCAGAGAAGTTGTGCCTCAGATTCGCCATTCATGATTCCAGGATGATAATTGAAAACAAAGATGAACTTTACCAAGACATAATTTGGAATGAACTTAGACAGTTCGGTTGCCACAGTTCATTAGTTTTATGGTTGATATTTAGGATACTGAGGGGTAGAATCTTAGCTTCCCCTGTCCTTTTTGGGACCTCCTCACTCCTCCAGTCTGTCAAAGGGGATACAGAGAGATCCAGAGGCTTAAGCTTTAAGTCTGGCATCCACTTGAAACTAGAACT…
CUFF.24910.1	chr22:32897020-32906984	+	ggcaaccccgcactgaCTTCCATTGTGATTCAGAAATGGTGGTGTCACATGGATCCTTGTTTGGAAGGAGAGGACTGCCGAGTGCTGCCCGATTACTCAGGTAACACGGTAGCAGAGAGAGAGGTGCCTCCACGCTGGAGGAGGGACGGGCGGCAGCGCTCTCCTGTCGGGCCTGCGGTCCTGGACTCTGCGGGAAATTGTCTTAGATTTTACCCACGCCACGTGGGCATACCTGTGCTATGAATGGCGGTGTTTACTTAACTGTTCCAGCTCTCACTGCCTCGTGACTTGACTACAGTGGGTTATAACCATGGGCTGCCACACACCCAGCGGACAGCCTACCTGTATTCCTAAGGAACATACCTCCAAGAGACTCTGGACCAACAAACTGGAAGCTGG…
CUFF.24938.1	chr22:34903810-34906143	+	GCTTTGGGATGATGAAGAGCGTGTCTCTCATCCAAAAACTGAAATGATACCTTCAGaaggaacaatcaaaggcaagactttccagcagaatggtgacaagatctgGAAATGGAAGTAGAATCAGCATCTCTGGAACCCCAGATTCCCAAATGGAAATCAGGGACTGCTGAGGAGGGGGAGGGGAGCAGATGCTGGGGAGACAGCCAACAATGTGTACAGCACACTCAATTTCCCACAGTGAATGATAGAAAATAAAACAAAGCATGCTTTTGAAACCAGGAATACTCACACATGTGTAGCACATACATGCTCAGAGAGAGAGAAAGAGAAAAATGTTGCATCCCAAATACCTTTGTAGCCACGACAAAGTGAACAAAGTACAGAAACAGAATTAAAAAT…
CUFF.24984.1	chr22:36638797-36645173	+	AAGACGAGTATTTGAGATGTTATTTGGCTTAGAAGCAATTTTGTAGAGAAGAATGTCACCCTAGGGGTTTTCCATCATAGGTAAATTGCTTCAAATGTATGCATTCTCTCAGAAGGAAGAGGAAAAGAAAGAAGTTAGGATGGGGTTTGGGGCAGCGAATAGAAGGAGGAAGGGAACACTCTGTTTCTTGCCCACTGATGGCTCCAGTCCAGCTCTCAGATGAGACTGATGACCCCTCTGAGGACTGAGCACGCAGTCCCCGGGCACAGCCGTCAGGAGGGACGTCCACGCGGCTGCAGTCTAAGAGCGCTGACGTGTTCTACTGCCAAGCTGAGGAATAAATGTCACGAGAAAAGCCCTTGAAAATGATTCTCATCCTGCTTTTCCATCACAAACAGC…
CUFF.24984.2	chr22:36641740-36645173	+	TTGGGGCAGCGAATAGAAGGAGAATCAGGAAGGGAACACTCTGTTTCTTGCCCACTGATGGCTCCAGTCCAGCTCTCAGATGAGACTGATGACCCCTCTGAGGACTGAGCACGCAGTCCCCGGGCACAGCCGTCAGGAGGGACGTCCACGCGGCTGCAGTCTAAGAGCGCTGACGTGTTCTACTGCCAAGCTGAGGAATAAATGTCACGAGAAAAGCCCTTGAAAATGATTCTCATCCTGCTTTTCCATCACAAACAGCCCAAAACGAACTGTTCTCAAATGTTGAACTGTAATATTAGTCGTGGTTGAGAAAGGCTTCTGGTAAGAGGGTTCTTGGGTAAATAAGTTGCTAGGATCTAATTGATTATCAATGAAATTCCCAGAGCAATCTCTTGTACA…
CUFF.25014.2	chr22:37676913-37677706	-	ATTGGTGACATGAAGATTGAGGGCCTTTGTTACAAGTTAGATAAATTGGCCACCTCTGTAACATCAGATGATCCAGATTAAGAAAAAAAACATGAACAATAATTTTAAAAAATGAATAAGCCTGCTTTTTCCCCATCTAAAGAAAGCCTCTCTAAGCAGCTATGACACGCGTGCCTCAGGAGTGCGGATATTACTGCTATGTGAAACATGCTGATTAAAATCATTGTTTCTGTCTCAGGCTGCAGATTTTTCACATCAGTTTGAAGGAACAGTAATGCTAAGAACACTTAATTAAAAGCGCTTGATGTGGTCTGCTACTGTTTCAAGTACTTCAGGTGCTTTAGTTCATTAAATAGC
CUFF.25014.1	chr22:37676913-37717421	-	CTCAATAAGAAACGTTGACTAGCGTGTAATTTCCGGAGCACACTGCCGGAGATACTGGCATCTCTTTCCAAAAGTCACTTTGATTCAACTTCTATGAGTTTCTCGCAAATGGCAACATTTCGATGGTGATGGGCGAGAGGAAACGGGCAGCAGTCCGGCTGATTTGATCTCCAGTGGGGTGGATTCAGTGAGCCCCAAGAAGCGGGTCTGAGTTTTCAATCCAGGTCTGAACAAAATTAAGAAGAAAGAGCTGCTACAATCACAGCAGATGAAGATCTACTAGTAAATTGATCAAGATTTTTGGCCAGCCCTCCAAAGAAAAGATAAATTGGCCACCTCTGTAACATCAGATGATCCAGATTAAGAAAAAAAACATGAACAATAATTTTAAAAAATGAA…
CUFF.25024.1	chr22:39081700-39111487	+	GGACCGATGTACACGTGTTTGTTACAATGTTATGGTGTATGCATGTTTGTTACAATATTCAGACCTTCCAGTACTGAAAGTATTATAGGTGGAGAGGGAGAGGAATCGAAAGGAGGCCCAGAAAGACCCTGTTGGACTCTGGTATGATTGAAGCCGGAGGCACGCATGGACTTCATGGCTATTTGCTCTAAAGTGGAGTCTCCCAGCTCTCACTTCTGCGACTCCTGATGGAGACTGGGCAGAAAAAAGGGAAGCGTGAGATGTTTGGctagagaaagttgtgcctgcattgagtcttcaacaagcaggaggtgttaccaacggagagatggaaggagagccgtctcatgcagcccacgtgaaagcctacaggtgaaagaaggacggcaaaccattcaa…
CUFF.25051.1	chr22:41146210-41147697	+	agggcggcgagtttaaggaactgaaaacagtggcaagaaaacggtacttctggagcagagggagccgggaggaacgtgagacacgatgagATGTCGAGGTTGGCAGAGCTGAAGCAGCCGTTGGAGAAAGGCTCGGGGACTTGATGTACTGGGGCTGGCTGCTGGGCATGTGTTCATCATTTCTGTGGCATCTAGATTCTTCTCCCACAGTTCAGGTATATGCCTGAACATTTGATGTAACTGCTTGACATCATTATCAGTATTTTCTCCTGTGTCCCA
CUFF.25180.1	chr22:44561384-44667012	+	GTGGAATGAGGGGGTGGGGGTTAGAGCTCTCCCCATGGAGAGAGAGTGAGGAGGTCCACTCAGAGCCTGATCCTCCATGTACTGGAGGTATGGCTGCGGAGAAATGTAGCCCTGGAACTGGAGCTTTCTCCTCTGATCTGGGGGCTGGCTTCACCTTTCTAAGCTTCAGTTCCTGAGACGGCCCATACAAGCCCTACACCTCACAAGAAAGGAGACCTGGATCTGTGACACAGCGTCCGTGGACAACTCCAGAGTAATGAATCAGTGTGCCTTTAGAGGAATGGAAGAAAACACAGAAAGGCCTAAACGGCAGCGGCA
CUFF.25189.1	chr22:45017494-45019236	-	atcttaccttgttgaggactgaatatttttgtattcctataaatcttctggagttttgtcctggaatgcagggctcatctcattcgattcctgtttcaaaaggatctctgtcctttgttgcctgatgctgatgttctgctaagtcgcatcagtcgtgtccaactctgtgtgaccccatagacagcagcccaccaggctcctccatctctgggattctccaagcaagaatactggagtgggttgccattgccttctttaatgcatgaaaatgaaaagtgaaagtgaagtcactcagtcatgtctgactcttcgcgaccccacggactgcagcctaccaggctcctccatccacgggattcttcaggcaagagtactggagtggggtgccatcgccttctc…
CUFF.25190.1	chr22:45019979-45075499	-	GGTGAGGGGGATAGGCTTTCTTGTTTAAGTGAGGAACAACGGTAGGCAGTGCTGGGGGCACCTCTAGTGTCTGAGCACCCTCACTACTCAGGAAGAAACAGCAGCAGCTCCAGCTGACTGGCCCCCAAGGCTGTTGGAACTGTCCTGAAGCTAGGACTGGCTGCTATCCTTCAAGAAAATAGAAAAACTCTGCTTGCCTACATCCAGaattcatctgtgaagccatctgctctggacttATTCCAACGAATATTCCCAAGAAGTACCACTGCCAGTGTCCTTGTCCCTGCAATGAGCCACAGCCGCCCCCTGCCTCCACAGGAGACCCTCTGATATGAGCAGcacgtgggatctttagttgccttatgtggactcttggttgtggcaatgtcggatcta…
CUFF.25190.2	chr22:45032154-45075499	-	GGTGAGGGGGATAGGCTTTCTTGTTTAAGTGAGGAACAACGGTAGGCAGTGCTGGGGGCACCTCTAGTGTCTGAGCACCCTCACTACTCAGGAAGAAACAGCAGCAGCTCCAGCTGACTGGCCCCCAAGGCTGTTGGAACTGTCCTGAAGCTAGGACTGGCTGCTATCCTTCAAGAAAATAGAAAAACTCTGCTTGCCTACATCCAGaattcatctgtgaagccatctgctctggacttATTCCAACGAATATTCCCAAGAAGTACCACTGCCAGTGTCCTTGTCCCTGCAATGAGCCACAGCCGCCCCCTGCCTCCACAGGAGACCCTCTGATATGAGCAGTTTATGAGAAGACTCCTTTTGAAAGCCCCAGTTTGTGACTCGAGTAGCTGAAGGAGC…
CUFF.25213.1	chr22:46312827-46314544	+	gtccccaccttcaaggcatttttggaaagatagagaagacagacatctaaataagaattcacaatagaaaatgAGGATACATTACGTGGCCCAAAGATGGGAGCCAGGAGCTCAGATTTCCAGGAAAGAGATACCAGAGGGCTGGTTGTGGAGCAGAAAGGAGAACGAAGAAAGAACTAGGAACCTTGGTTGAAGAAACTGAACATAATTCTAAGAAGGAAGAAAAATTGGGTTTTGCAGAATGGGTGGGAGACAAGAAACAGGGACACTTtggacagaggaagttgtgtaaaagtgagcaagatatggagactttgatgggtaaaggaaactgcctatcttgactgtggtggtagttacaaaagttcatacattcatctaagtgcatttaaaatgggt…
CUFF.25315.1	chr22:50461961-50463388	-	AGACCCTGGGAAAGCAATTTTTCAATCTCCAACTGCAAACACTAATACCGCCGAAGCTAATTTTACAGATTTCCACTCTGAGGCCTCATCTTTGTCCCAGAATCCCTCAGCCTGAGAGATTAGTAGTTTAGAGACTGGAAAAAATAAGGTATTTTAAAATTCAGCATAAAACTTTCTTAGACTCAGTGAGCTAAAACAGAAATAAAAAAATTTTTTTTTGATTGGAAAAGAGCCTGTTAGTGAGGGAGGAGCCGGGTCCGGTCACTGTTCCACCAGGGAAGGTGTTTGAAGGGAGGACGCTCTTCCAGTGCCCAGATGCCTCCAGTCCTTGCAACAGGCTCAAACCTGCAGCCTAAGGACGGGCAGAGAAAAGGGAGATGTCAAAGCTGCCAGGACGAG…
CUFF.25422.1	chr22:52864566-52870148	-	AAGAACCGAGGCCAGATCTCCACGCTCACTGTCCAGTTCAGCTGGGGGAGCAGTGTCTTTGTCCTCTGGAGCAGCTGATCCTGCAAGCCCCCAGCGTGGAGGTCTGCCGCCCAGTACCGTGATGGGCCTTCGAGAAGCAGGCTGAGCAGCGAGGGAGAGAGAAGAAACCGTGTTGTAATTATGGAAACAGcgtggggcttttatgaacagtactgctctgacgtacaagattctgtgcacatacattttcattcctcaggtagattgctaggagcagaattgctggatcatacatacgGTGCCCTGAGGGTGGATACCCACTTCTCTTAGGAGATTGgaatgattgatgtttcgatacagcatgaaagaatctcgaaataatgatgcttagtgaaagaa…
CUFF.25449.2	chr22:53849212-53851885	+	tggtgatactggagacgatgactagaatgatgccctcgtgctgatgagagaggatgtgatcccgggcagcgtggacgagatgggcttggagcatggagaatccatccgcatggcaggagggaggcagACAGGATCCCTGCAGCCCAGGAGCCTGGCCTCACCCTTCTTGGTTACACAGAGCATAAGCTTTCTAGGATATTGACATTGCGACAGGAAAGAGAAGCAAAGAGAGGACTGGGTCAGAATCAATTGTCATGGATGAGATGCAAAAAGGAAATCTGTAAGATCAAAGAGAAGGGGCCAGACAGCCGACAGCCATCCAACAGACCTGTACTCTCTCCAGGCGGGAGGCTCTTCATCATAGAGCCGCTCCCTGGGGCTTGTGAGGCAGACTGGGGA…
CUFF.25460.1	chr22:54099739-54100661	-	GACGACCCCGGGCTTGGTGAGGCTGAGCCTGGCCTCTGCCGCTTTTCCAGACCGTTGACTTCCCCCCCGCGCCGCAATGCCGATATAGAATGCCAGCTTAAACAGCAGACGTCCTTACAACAAGACACCGTACTGAAGTGTTGAGAAAAAAAAAGATAAATCCGGAGTTGGGGGTGCCACTGAAATAGGCTACTGAAATACTTCCGCAACCAGAATTCCTCTTTAGGCCACGGtgtataccaagcagtcttgcagctgagggtacaactgtgaacgaaacaaaccattccctaccattcttggagtctGTCCCACAC
CUFF.25553.1	chr22:56761761-56762742	-	GACCCCACGTGATAGAGGAGAGACCGAGAGGTTGAGTGAGGAGCCTCAGAAAAGGCTCGTAAATGCTATAATCAGCGTTATTTGCTGCAGGTTTGCGTTTGCAGGACCCTCGGCCCCTGGCGGAGCCGGGAGAAGGAGAGGTGGGCGTGCGGAGGAACCGGTCGCATTACTTGGTAGCTGAGTGGATCCATATCAAGGGGCCTGAGTGGACAGTGAGGACCACAGTGTAGGGACCGGGTCCCCCTTCCCATGCTCTACGCGACTGCTGTCCCCTGAGTGCTGAGCAGAGGAGAGAGCTGTAAACCAAGAGGCCCAGCCCGCAGTGGAAGATGAAGTGCTGATGAATGAGAGCAGGAAGCTCTCTCCTTCCTGACCGCCGCCCCCCGCCCACGCCCATCC…
CUFF.25583.1	chr22:57562931-57567835	+	GCCTCCACGGCCCTGAGAGTCTTCTTGTCCACGAAAGCTTCACCTTCAACTACCTACAGCACCTGATCTCACCGGAGGAATTTGTGAGCTGTCTCTTATCATGCATGAAAGCCTTTGGAAATTACCAACAGTGAGGGTCTGAACGCCCCTGGGAAACGCTCCTGGCAGCTGCACCCTCGCTAGAAGCCCCTGGAAGTGAAAGAGACTCACTTATCTCACCAAGGACAGTGTCCCGAGCGGCCAGCCCATCggacatctgggactcagcctcacttgcttctattactaacttccttcctgacctcggcaagctccgtaagttgtctgtgttttctcacctgtaaaatgaagatgatagaactagatgaAACTTGCCACTGAAAACCTCAGTGCCTGAAT…
CUFF.25598.1	chr22:58026300-58032879	+	GGCGGCGGAGCGCCCGGAGGGCGGAAGTGGGTGGTTTGTTGGGTGGGCGTTGACCTGTTCGTGCCCTCGGTCCGGATGATCCGAGGATGCACCACCTTCTGGGAGTATCAGATTTCCTCTTGTCCAAGCTTCTCTTTCGCTCCCCACACTGTTACAACATCATCCTTGAAAGGTGATCAGCATAGAGAAGAGACCTGTCACTCTGCTCTGCCAACACAGAACGCCCTTTA
CUFF.25767.1	chr23:8055107-8070457	+	taaggtacagtttgggccgaggcagaaaaggagagaccacctcaacgcagAGCACCCCTGGGTATTCTGTGGTGGGAGACGCCTCAGGATATCTGCTGGTCACTCCCGTCTGCGTCCACCTCTCTACCGTTTGCTGCTCCCGCTCACCTCTTACCTTCTCTGTTTCACCCCTTCTCCCTGCACCAGTGCACACCTGGAACCCCCAAGAACGTTACTGAAGATTTGGGAGACAACTGAAAGAGCCCTGAGAGGTTATGATAATGTCCCCACCAGCAGCAGTTACTGTCCCACAACTTCCCTCCTGCTCAGATCTCCAGGTCTCCCAACAC
CUFF.25823.1	chr23:9372946-9379439	+	AGGGGCCTGAGAAGGAGCAACTCATCAGGAACTTCAAGGCTCGGACCAGATTCAATGCCGGTTCTTCATGCGGGGGAATGGCCGCTGCCCTTTCAAATCAGACTGCATTTACCTGCACCAGCTTCCAGATGAGGCCCCGAGTTTTGATCCTCTCTGGCCTGAGAGTATGCAGCTGGCCTCTGTGGGGGGCACACCAGTGTTCCTAGGGGGCACCGAGCCAGACGAGGGAGTGTTCTTCATGGACCGTGCCCTGGGCGTGGCTTTCTGGGGTTCAGAACTCCTCCTGGACCCCAATAGTTCTTACAAGTGCCTGCTATAACCAGGATCAATGTGTGGGGGATGGGGCCGAGGGGCAGGGGTTGCCAGGTAGTAGGTATTTCCCCTTTTGGGGCTTGGTAA…
CUFF.25831.1	chr23:9470284-9471266	+	gcccactagagtcacccgggaagcctgtaaagcccaacagtcaagtcacacctgacaccaatgcagtgaagctctttggaggcagatggggcccagggtcccgaggctttaaagcccccctgtgattgcgctgtgtggccaGCTGGGGGAGCTCTTGCAGGGAGTCGGCGGAAGGCTTGGAATGCTCGCTCATCCCAAACGCTTCCTGCAAATAAGAGCTCCGAGCTCTTCTGAAATTCTGTGTTTTTTCTCCTTTAGAATTTGAAGGCATTCAGACTTCATCTTCTTTCTAATCGGTCTTGTTTCTTTACGGGCTTTTCTTTTCCTTCCTAAAGTTTCACCAAATTCCTCGTTACAGGCTTCCCGCATCTCCTTTACATTGTCTTTTTTCTCCACCGC…
CUFF.25908.1	chr23:11678261-11681072	+	ATGGGAGGTTTTTGCAGGGGCTTCCTGAGAAAGGGGCAACTGGATTCAACCGAGGCTGGGGGGACTAGAGGGGAGAGGAAGGGAGCACCCCCAGACTCGGAAACCCAATTCTGGCCTAATGGGAGCGGCACCCATTCCTGTCTAGTGGGGAGGTAACCAAGTTGGGCATCCTTTGGCTGAGACATCAGTTGGGGAGCCAGGGAAACCCAAACAGAAGTGGGAACCCAAGAAATGGTTGAAAACTCAGCCAGGAGAGAGTGACAGTTCCCTGGAGAATGGGAACCCTCCTGCAAGTTTAGAGGAGGGAAGTAGAAAAGGAGCTCTTTTTCTTTTAATTACGTAAGTTTCAGGTGTACAGCATTATAATCAACACCTGTATGTGCTGCAAAGTGCTCTCCA…
CUFF.25909.1	chr23:11684111-11684840	+	TGCTGGGATGAGATTGCTGCAAACTCTGCAGAGTGGACGAGTCAGTAGGAGAAGAGGCAGCCTCAGGACCCCCTGGACAGACCTCAGAAACCTTTAACTACAGCCTTGGGTCTTTATGCCACTAGATGAGGCCCTGGCCAAGGTCACACAGCTAATAAACAGGAAAAAAAAATCAAAACCAAAGTTCTTAACGGGAAGGGGAAAGAGTAAAAAGGAATATTTTTTGAGTGCCAAATTAGGAACTGTGACCATCATTTGCATCTCCGCATTCTCATCATTTGcatctccgcattctccgtatccggcataataccccgcatacagtgagcactcaatgaatgcctactggatgaCGGAGTGGAGGAGGGAACAAATAAACCCAGTCATCCACACCCAAATT
CUFF.26089.1	chr23:16928497-16929129	+	CGAGCGGAAGGGAAAGGATTAGCAGGAGCGGAGTTGGCTCTTCCGGGGATTCTTGAGTCCTCGGGATGCTGGTGGCTTCGAGGGGGCCTTTTCCCTGCCCGCAATCCTGTTAATTTACGTGGTGACAAGAAATGGTTAAGTTGAAATTGAGGATGGGGAACTGCGGAATAGGGGCGATTCGGGAGCGAGAATCAAACCCAAAGCAGGCATCCGAGTAAAACTGTCGCCGTCTCAACCAGAACACTTATCGGGAACGTCGCTCACCGCTAGGGGTCCACATCGTGACAGCTAGGAGGCCTGGAGAGTTTTTGCAAACGATTTGGAACCCTCCAGTGTGCGACCAGAATTTTCCTGGACACTTGGGTGCAGTGGTAGTCCCTGTATACTACTAAGTACAAA…
CUFF.26256.1	chr23:27323702-27324967	-	GAAGTGGAGAGCAACATGCCTTCTACCTGGGTACTGTGGATTTTGCTGATGCAGAGGATGTCCTACCTGGTGTTGGTCAGATCCTTGGAACTTCACATGTTTCCTGCATGAACCTGTGTGAGCAGCTGTCAAACTCCGGTGGAGAGGGGATGGGCTGATTAGAAGTTTGGGGACCAAAGTCAATTAGGTGATCTTTATTAGAAAGATTGCAATAAAATGTTTTAAAGCAAATAAAAATAGGTGGGTCTGAGCAAAAACAAGAGGGTACAGAAAGGTTTAGGGATGTGAAAGTGAATGAGCATCAGTTGACATCTAGCTGTATGTACCTCTTTCCAGCTACATTACAAAAAACTAAAATTAGGTTTGTCACATATTGACACCAATGTTGAGGATTTCTAG…
CUFF.26262.1	chr23:27354601-27355157	+	AGCGGCGGAGCTGGGGTGCGTAGATAGGCGTGAGTCAGAAGCAACAGCCTGGAGAGCGTGGAACGATAGGGTTTATGTGCCagcattgagaggagtccaaagtagaaagtaggccgacatgttagttcaatcaccggttccgtaattacctgtctgggtgatctggccaagccacgaaacctctgaacctttgtgctcatctttgaaaacagaaaggtttggctgaaggactctGCCTAAAAATCTCAAGATAGTTTTTATGGTAAACTGAAAGTATTACTATCATAGTCCTGGTAGTAATCCCCAACCTTGTAAGCACCTCAGTAAGAAATGATTGAGAGATGAGACTCGAGAGAGTGTTACTCCAATAAAAGAATGAAGGGCACAAACTTTTGAGTA…
CUFF.26401.1	chr23:30328503-30332003	-	GGTACTGCAGAACAGTGCTTTTAAAGTATTCCTTTAAAAAATGAAGATACAACAAAACTAAATTAGTCATGTCAAAAACGAGGAGGTATGCAATGGTGGCATTCCAATATGTAAGCCAGACTCTATGTCCAGCGGTCATGCCACGAAGCACACAACCAGAAGAGCACTTAAAGCAAGAGGCCATAATCCTGAGATTGAAGGAAGACAGGGAGGAAGTAGAAACAAATTAGGCAAGAGCTGGGGTTAGAGGTAAGGAAAGGTGCTCAAATTGAACTAAACCTTCGAATTTGGAGGACAGAGGCCATAATCCTGAGATTGAAGGAAGACAGGGAGGGAGTAGAAACAAATTAGGCAAGAGCTGGGGTTAGAGGTAAGGAAAGGTGCTCAAATTGAACTAAA…
CUFF.26414.1	chr23:30797869-30800239	-	GAGGTGTCAGCGGGCAAGGATGAAGATGGACGAGGTGGAGAGAGAGTACAATCCCGGGTAGCAGAATTGTAAACGAATGCAGGCCTGAGAAATAGCCTGCTGACCTTTGCTAAAGTGTATAGCAACAGCAGacaagactcctggaggaacagcagctattctcaatctatggtaatgaaagccactgagcaaagacaattgagcaaagaagacagaaggagcctgggaacttcatggcattcttgaccagtggtgccagccctggatgattgacctcaggacctcttgttaaatgatatatacaaactcctttttgtttaatccactgcagtaaaattttcttttgcagtgaatcaaattctaactgatGATATGGCTAATGTGTGTTAGTACCTGCTT…
CUFF.26425.1	chr23:31332908-31335190	-	CCAAATCCTAAAGATGAACCCCTGCTTCTCCCCCAAAGACCTAAAAGACCGCGCAGCCATAGGAAAACTGAGACGCTCCGTGCAGGAGTGAGCTGGGACAAGCCCTGAAGAAAAGACTGGAAACTGGAACCCTCAGAAAAGACCCAGCAGAAGATCTCTAAAAACAAAATGAAAGCAGGCCTCAGCTCATGTCAGAACACCAGAGAAATCTGAGGAAGTCAAAAAAAGAAGAGAGAAAAacacacaca
CUFF.26482.1	chr23:32804507-32815359	-	GTGGAGGCTGGTACTTATTTGCGGCCTAATAGTTGAATATTTACTGAAGGCCTAAAGTGAGTTACAAGTTTGGAAAAGAAGATTTGACCAGGTACCTTGGTGTTTATTTAAACTAAGAGAAAAAGGGCACATCTTCATGCAATACTTATTTGGTTCTTTAAATAACAATTGTGACAAATAGCAGAAAGAATTAAGGAATGCAGCAGTTGATAGCTGTTCAAAACATCAATATTTTGGGTTGTACATAAAGACATGTCTCAAACACTTTTTGAAATACCATAATAGCCAATACTAGAGGCATGCCTTCAGTAGGCACGGGAATGCAGTTTAGAAAAAAGAAAAAACAAATCATGCAAGACTACTGAATTTCATTAAAATCACTGAGCAAGAAAAGCAACA…
CUFF.26518.1	chr23:33261039-33268244	+	gtggaagaaggggacaacagaggatgagatggttgaatggcatcaccaattcaatggacatgagtttgagtaaactctgggagttggtgatggacagggaagcctggtgtgctatagtccatggggtcacaaaaagttggacatgacttaagtgactgaactgaactgaATCTAACCAGAGAACACTAGAAAGAACAGAGAGGAAGCATACCTTGACAAACAAGGCAAATGCAGATTTATTATTGCCCACTAGAGTTAAGGACAATTTTCAGGTTGGGAAGTGAAGTGaagtgaaatttgttcagtcgtatctgactctctgcgaccccagagactatacagtctgtggaattctccagaataactggagtgggtagctgttcccttctccaggggatc…
CUFF.26530.1	chr23:35370283-35375387	-	gcttggcccttgatacaaacagaatcTACAAGGTAgtctttcaccaaatttaggaggttttcagccattgttccttatgaatttttaccagcctcacacttttttctcttctccttctggcactgtgatggtacaagtgttagttctagactctgttcagtcattgttttcctttggttttcattattcagattgagtaagatctattcatgaatcttcaagtttactgactctttcctctgccacctccattctgatcattgaaaccaccttatgagatttttatttcagttactataatttcaattctaaaatgtccatttagtatttcataatgttttgtatttctttgctgagattttctctttccagtttcaaaggtgtttctgtcttctttct…
CUFF.26533.1	chr23:35378916-35381157	+	CCAAGCTCTTCTATTTTCCTCCACTTTTAAAAGACATGAATTTAAACTGGTGTGGTTCTTATTGAAATGGACACCCCCTTTTGGCACAGAAATGTTAAAGGAAAACATCTTTGAGAAGCTAACTAACAGAAGGCCCTGAGGATGAAGGATGTCTAGAATCGCTGCTGTGTGATAGGACAGGGAGTTGCACCCTCCTATGGGAGTGCTCCGAAGATGACCCTTGAGGAGACAGAGTGAAGAAAAGCCTTCTAAAACATGTACTTGCCTTTCTTTCACATTGTCTTTGGACAATCATCACCTTCCCATTCACCAGAAATCTTCTGCAGCAGCTCAGATTGCTAAAGTGGTGTCTCTGAGATAACACTGGGCAGCACAAAGACCCTGCCTGAGTGATGAATT…
CUFF.26656.1	chr23:36027626-36132351	-	agaccgcccttgaagaagcctatgggtggtgtttggtgagcggctcccttgagtatgtggtggagggaggttggcgtcctggacacaggtggaagcttcacacactctgccctgtacctctctctgttccatttggctgcctgtacctgggctgtgtccttgatgataaaccaccagtccgTGAGTAAATTTCCAAGCCATCAAGAAGAAATACGGTTGTCTCTCCAGCGTTCCAACAGGACCATTCCAACATcacttgaacAGAGGTCAACTCATCAATCATGGACTCCTAAACC
CUFF.26656.2	chr23:36033738-36132351	-	agaccgcccttgaagaagcctatgggtggtgtttggtgagcggctcccttgagtatgtggtggagggaggttggcgtcctggacacaggtggaagcttcacacactctgccctgtacctctctctgttccatttggctgcctgtacctgggctgtgtccttgatgataaaccaccagtccgTGAGTAAATTTCCAAGCCATCAAGAAGAAATACGGTTGTCTCTCCAGCGTTCCAACAGGACCATTCCAACATcacttgaacAGTGAACTTGGTTCCTCTCCTTC
CUFF.26540.1	chr23:36133706-36179798	-	ttgaaggtgggaagactgtgccaggcagaggACAAAGCGAGGGATGAGACTGGAATGGCGACATTCCAAAGCAAAGCAAGAGCCAGAGCAAAGCACAGACGAAGAGTTGGAGATCTTGAGCAATACACCTGGAGCGGAGGATGGGAGAGCCAAGCATGGCTGGGATGAGCTGGAAAGCGCTCCCAGGTGACTACAGAAGCCTCGACACCCAGCGTGGTC
CUFF.26616.1	chr23:38115031-38139725	+	ggcgagctatcctgtaagctggcacgatgccactgtaacagatggccagcagtgcaggcagcagagaccatggaggagcatcgcaagtgaatgctgaggATctgatcttggagcttgaaggcatggatttgaactctaactatatccttccagctgcatgacccgtaacttagactcttggaactcacatcccacatctgtggaaaaggggtaataacaatactctttcctccagaatgaacgagataatatatgtagaaggactttacagaTCAACACTAAACCGTTTCTGCCACATCCAACATTAGTGCTTTGCACCAGTCTTAAGAAGTTCTTAACAAAAAAATCCTCTGCAAACTCTAATAACAAACTCTCCTAAGGCAAGAAGTGAAAATATTA…
CUFF.26616.2	chr23:38115031-38146216	+	ggcgagctatcctgtaagctggcacgatgccactgtaacagatggccagcagtgcaggcagcagagaccatggaggagcatcgcaagtgaatgctgaggGAAACCGAGAAGGAAAACAATCAGCTCTGTTCTTCTCTCTGAGCTGGGGGAGTGAGCTATAATAAGGGAGCACAAGAATACGTCCAGACCCAGCAAGCCTGAACACACAGGTTAGCACGCCTGGCTGACCTAACTCGCAGgtatataccttaccactggaccgccagaaaaatccTGAGCAGAATCTCTTTTACTTTAAAATCTGCATTCCTGGGTTAGCTAGTTTTAGAGAAGGATctgatcttggagcttgaaggcatggatttgaactctaactatatccttccagctgcatgaccc…
CUFF.26650.1	chr23:39785513-39793197	+	CACCTGCCCCTCCACCACCACACACAGCCCCAGCCTCCTCTGGCTACACCTTGTTCTTGGTCACATAGTTCTAGCACATGGAAATAAATTGGAGGTAGCAGCATACCTCTTCTTCCTAAGATCATCTCCATCATCTTGTGACCAAAGGAGAAAATAACTCCCCAGCTGTCAGTGGCTTTCTCAGCTGCCAACACAAGAACCTGAGCATACAGAGGAATTAAGGACAGAGAGTCAACATGCACATTTCTGCTTATACCACGTGGGCTTCTGCTGGTGGTCATGATGCAGCAATGAAAATCCATTCCTCACTCAAATGAAACTCAATCTTCAGACAAGTCTTGAATGATTTACTACAACCTCATAAAAAGTGTCAAAGAGATCTGTAAAACAAGACCAGTT…
CUFF.26650.2	chr23:39791291-39793197	+	ATTCTCTGGGTCCTGTTGGACCTGTTAATAGTTAGTGGACCAGTGGTAGGTGGAAGGGAGGAGGCTCTGACTGAGGAGCTGGGATCTGGCTCAGTGTTGGCCCTTGGACCATGCTTCTAGGATGGACCACGCTTCTACTTCTCAAGGATCAATAGGGCTGCAGACTGGAGAAATGGGAGATGCAGCAATGAAAATCCATTCCTCACTCAAATGAAACTCAATCTTCAGACAAGTCTTGAATGATTTACTACAACCTCATAAAAAGTGTCAAAGAGATCTGTAAAACAAGACCAGTTTGCCTACATTCTTTAAAAAAGTAACTATAGAAAAGTCTGAATAATTGTGTGGTACTGTTCAAACACGTTTGACAAGCCTTCTACAATCATAAGTATGCACTTG…
CUFF.26677.1	chr23:40202139-40219039	+	ACAACTGTGCTCTGTGTCATGATTGTGCCTAAAGTTGCATGTTGATAGTAAGATATGCCTCATGAAAATTAGTCTTTGGCTCAATTACTATTCAGTCCGTGCCCATTTCCACCTGATAGTCCCGTAATGACCAGCATGTGTTTATGAGGTGATTCGTTAGAATCTTAGAGAAAAGATTGACAGTAGCTGGCTCAAATGGAGAGACCAAGCTTTTAATTTGATTGAAGGGATGACCTTTTTGTGTGTTGGCCTCCCTCCGAGCCCTGTTGAATCAAACCAGATCTGCCTTTTAAGCTGGCTGGTGCCTGTGTAATTCTCATAAAACGATGCAAAATTTGATGTTCTTAAAGTTTAGATTTCCCTGCATGGTGTCTTCAGGTGGAATTATTTTTTAAAGCC…
CUFF.26677.2	chr23:40202139-40588543	+	ACAACTGTGCTCTGTGTCATGATTGTGCCTAAAGTTGCATGTTGATAGTAAGATATGCCTCATGAAAATTAGTCTTTGGCTCAATTACTATTCAGTCCGTGCCCATTTCCACCTGATAGTCCCGTAATGACCAGCATGTGTTTATGAGGTGATTCGTTAGAATCTTAGAGAAAAGATTGACAGTAGCTGGCTCAAATGGAGAGACCAAGCTTTTAATTTGATTGAAGGGATGACCTTTTTGTGTGTTGGCCTCCCTCCGAGCCCTGTTGAATCAAACCAGATCTGCCTTTTAAGCTGGCTGGTGCCTGTGTAATTCTCATAAAACGATGCAAAATTTGATGTTCTTAAAGTTTAGATTTCCCTGCATGGTGTCTTCAGGTGGAATTATTTTTTAAAGCC…
CUFF.26677.3	chr23:40202139-40588543	+	ACAACTGTGCTCTGTGTCATGATTGTGCCTAAAGTTGCATGTTGATAGTAAGATATGCCTCATGAAAATTAGTCTTTGGCTCAATTACTATTCAGTCCGTGCCCATTTCCACCTGATAGTCCCGTAATGACCAGCATGTGTTTATGAGGTGATTCGTTAGAATCTTAGAGAAAAGATTGACAGTAGCTGGCTCAAATGGAGAGACCAAGCTTTTAATTTGATTGAAGGGATGACCTTTTTGTGTGTTGGCCTCCCTCCGAGCCCTGTTGAATCAAACCAGATCTGCCTTTTAAGCTGGCTGGTGCCTGTGTAATTCTCATAAAACGATGCAAAATTTGATGTTCTTAAAGTTTAGATTTCCCTGCATGGTGTCTTCAGGTGGAATTATTTTTTAAAGCC…
CUFF.26715.1	chr23:40801029-40802222	-	aggagggaggagtcaggcaactgaaaaaacaaacaagcaaattatattaagaaaatatgcttgatggcaagaggtgctatgccaaacaagaaagcaagaaagggcttcccagggggtccagtgacacagaatctgcctgccgatacagggtacatgagttcactcctgggttcaggaggaccccacccactgcaaggcaactaagcccaagtgccacaactgctgaatcccacacaccctagatctgtgttcttcaacaagaaagcccaccataatgggaagtctgcaaactggaaagagagagtagccctagctcgctgcaactagagaaacccctgagcagcaaggaagacccaatgtagccaaaagaaaatttagtaaaagaaagcaaacaagaaa…
CUFF.26734.1	chr23:41484898-41486521	-	CGGGCACAGGCATCTGGTTCCAGCACCAGGCTCGTGTTTGCTCCTCTGCGTAAGTCCTCTCCCAAACCAGACAGCCACTCACTAGCCAGATAATTTGGAGAGTCTTTCTCTAAAATTATTAGCTTGTTGCTTCTTCATAGCATCATGGCTTTTAGACCGTATCTTGTCTGTCTTCCAGACGCCTGATATGGAAAAGTGCTAATTTGCAAAGCAGTTCTAAGAGAGGTTAGATGCGGATACAGGGCAGTGGAGAGATGACCATCCAttcgtacgtcggatgcacagtcaggccaaacaaactaaaacaccggattttggagcagagaaaggtttattgcagggccatgcaaggagactgttgctcgcgtccttcaaagccccgagagctccctgaagggg…
CUFF.26736.1	chr23:41486639-41512766	+	GCCGGAGTCGAGTGAGTGATTTCAGGGCGTCTAAATGAACCTCTGACTGTGTAGAGACTTGTTTCAAGACCAAGCTTCACAGGGGCAAGAGGGGCAGCAAGGTGTGAGAACGAATGGGCAGCAGGCACTGTGCCTGCTGGACGGCAGCGCCCGCTGGATGCCAGCGCCCGCTGGATGCCAGCGCCATCTTGTTTTTCATGGGATTTCTTCACTCATTCAGCGCAAAGGATACAACGTCTGCAGCATCTTCTGAACCTGGAGGGACGGGGGGCATTCAAGGTATACAAATATggtgaaggacacggaagcctggtgtgttgcagtccgtgcggttgcagagtcagacacgacttggcgactgaacAaggtatacaattcggtggtatgaaatatattcac…
CUFF.26736.2	chr23:41486639-41523204	+	GCCGGAGTCGAGTGAGTGATTTCAGGGCGTCTAAATGAACCTCTGACTGTGTAGAGACTTGTTTCAAGACCAAGCTTCACAGGGGCAAGAGGGGCAGCAAGGTGTGAGAACGAATGGGCAGCAGGCACTGTGCCTGCTGGACGGCAGCGCCCGCTGGATGCCAGCGCCCGCTGGATGCCAGCGCCATCTTGTTTTTCATGGGATTTCTTCACTCATTCAGCGCAAAGGATACAACGTCTGCAGCATCTTCTGAACCTGGAGGGACGGGGGGCATTCAAGAGAAGCAGCAAGTAGACCACCAGCCCGTCACAGCCGCTCCCTGTAGGGCTCATGGACAAGTGCGTAGGATCAAGAATTCACATTGTGATGAAGAGTGATGGGAGACTGTTGCTACCCTAC…
CUFF.26742.1	chr23:41796777-41797678	+	CCTTTGTACCTCAGATTGCACCCACAATGTTGAGTCGCTGTTTCTTTACTTTAAATGTGGAAGGAGAAAGCAAGTCAGTTTGAGCAAAGGAACGACTCAGAGTGTCTCTGCCACCGTCCCTCTACTCAGAGCCCCGTCTTGATGGCCGTTtgcagtgacttctcgcctggtctgcctgtttccacttttgccctgttcccaggaagcctcctcagtgcatccagagagactgtttgaattgcaaatcagactatgtcatcctctgttataaattgttttaatggcttctcattgcaattaaaTTTTTAaaaaatattataaatacctatgaatccattgcccacagaaaactggaacattaacaagaatgttcatctacttaggcattgagctgcatcc…
CUFF.26832.3	chr23:45301129-45303420	+	GAGGCAGCTGGAAGTGCTATTAGTGGGCTTGAGAGGGTTTAGACCAGGGGCTGGGATCTTTGATGCGGGGGTTAGAACTGTGGATTCCCAGTCCTTTTATCAAGGGTCTGGATAAATGGCTGGACAGGAGAGTTTTGCAGGTCTGGGCTCAACTCAACAGGATACTTATTACTGGTATTGGCAAAGGTGCGCCGATTTTTCCTGTTCTGAATGAAAAGGCTGATAGTGTTCTGTTTTGTAACACAGTTTGGCAATTGACAAACTACCGCTTTGGAAATAGGTGTTCTTAGTGAAAGCGGACACCCTCCTTACTTGGAGAAAGAAGAATCGAGTCCTAGGGCTTTGAGCGATTCTGCCTTGGCTGTTGATGTCCTACCCCTCTTCTCCCCGCTGCTCTTA…
CUFF.26830.1	chr23:45845657-45851640	+	aaggacccaactgtcaaaattcaatggaacaagaatcttctataaatgcattccttgaagggccgtcatctccaagacaagaaaacgtgccccaggatttaaggctgctcaagatcggtgaactgcgatgctcatgccaactcccagctgagatCAatgagttacgtttgtctacacctgctgctacaactctctaatttctagtcatcttccttctactacttcaaaatcattcgcaacctgcaattcttcccagcccgcatctacagcaaacttccagtctttctccagGACCTCCTGATCAAATTTCTGATTAGTTGAGTGATCTACTGTATCCCAAGTGGGACTGCAACCCCGAGTAATAGAGCCACAGG
CUFF.27032.1	chr24:2669494-2673016	+	gtgggcaccctgtcttattcctggtcgcagtgggaaagctttgaacatctcaccataagataatcctggcctcgtaaaatgaactggagtgttcggctcttcagttttttcaACTACCCAACAAATTGAACTTGACTCTGAAATCTACCTGAAACAAACTGCCTGGAGTACTTTGAGAAGCAAGTGGACTTAGTTTGGCACCTAAGAAATTTGAAGTAGTAATAATAACATGATAAGTAGATAAATGGTTACTGGGTACATGGTTTGGCATCTAAGAAAATTGAAATAATATGATAACAGAAATAATAATTtgttcagttgctaagttgtgttcgactctttgcaaccgcacagaccagtagcccaccagatgtgtccatgggattctccaggcaagat…
CUFF.27091.1	chr24:6820549-6910577	-	tgtgggcctgtggatgttgaggaccagaggatacagaggAATTCGATGATGGAGAGATTTCTTGAGTGTTAAAGTTCAGTATTCAGCGTGCCTTGAACCAACTCCTGAGACAGAAGGCAGAATGGCATTGTAGGATCATCCTTACTGGCTCTTATAATATACTTTGACATTTTCATATGACAGGTCATGGAAGATTGAAGTGATTGTCACAGAACCCTTGCTTTGGCAAGAGCACAGCTGTGAAGATTCATTCATTCCTGTAATGAACAAAAGCTGCAAAATTTTAAGGCATGATGGTGTCATCCGTGTTGCTGTTGTTGCTGTTTTGAAGTGAAAACTTTCTGTCCTCGAGGTGGTGAGGAACTCAGAAGGTGACATTTCACTAATGACTCCTCTAAG…
CUFF.27091.3	chr24:6820549-6910577	-	tgtgggcctgtggatgttgaggaccagaggatacagaggAATTCGATGATGGAGAGATTTCTTGAGTGTTAAGTAAGCAAAATGAAGAGTTGGTTCTCATTTCTGATTGATATACTGTTGCATTGCTTGAGCTATCTGTAAAATGGACATAAAGAGTTCAGTATTCAGCGTGCCTTGAACCAACTCCTGAGACAGAAGGCAGAATGGCATTGTAGGATCATCCTTACTGGCTCTTATAATATACTTTGACATTTTCATATGACAGGTCATGGAAGATTGAAGTGATTGTCACAGAACCCTTGCTTTGGCAAGAGCACAGCTGTGAAGATTCATTCATTCCTGTAATGAACAAAAGCTGCAAAATTTTAAGGCATGATGGTGTCATCCGTGTTGCTGTTG…
CUFF.27091.2	chr24:6820549-6915827	-	GGGGGGAACCACACTCGCCTCTGCTCTCTTGGAGTTCAGTATTCAGCGTGCCTTGAACCAACTCCTGAGACAGAAGGCAGAATGGCATTGTAGGATCATCCTTACTGGCTCTTATAATATACTTTGACATTTTCATATGACAGGTCATGGAAGATTGAAGTGATTGTCACAGAACCCTTGCTTTGGCAAGAGCACAGCTGTGAAGATTCATTCATTCCTGTAATGAACAAAAGCTGCAAAATTTTAAGGCATGATGGTGTCATCCGTGTTGCTGTTGTTGCTGTTTTGAAGTGAAAACTTTCTGTCCTCGAGGTGGTGAGGAACTCAGAAGGTGACATTTCACTAATGACTCCTCTAAGAAATTGACAAAGATGGATGCAGTGCCTTTATTGATGGCCC…
CUFF.27083.2	chr24:7306953-7328822	-	GGACATCACACTTGGAGACTATGTTTGGGGAGCGGTGGCTATTCCATTGTCCCGGGGAGCCGACTCTTGCGTAGTAGAGAACAAGAAACGCAGAAGACGAGACCAGATCTCTGCAGGCCTGGAAGCCGAAGCCGTCTGAGCGTCAGAAAACCCCTGCCGGCGTCACCATGCCATCCTGAAGTCTGCCACGAGATGAGTCAGTTTTCCATTAC
CUFF.27096.1	chr24:8330209-8331543	+	CCGATGGTTATTCTCCTTGGCTGTTTCTCACTTTTTCTGCCTCAAAGACAAGACGTGCGTCCAGCTCTTCTTTGACTTCTGAGCATTCACGTCTTTGGCGCTGCCCTAAAAATGGAGTTGTCAGAACAGCAAAGAAACATAGCATCTGACAGAACTGTAGGAGCCAACGTTACTTCATTAACTGAAAAGCTTCTTAAGTTATAAAATTGGGAATCTAAATCCGTTTGAATGAAATTCTCCTCAGGCCAGATAAGAAATATAACTGAGGGCTTACCCTGTTCTTTGATCTATCATTGATCTCTAGATGTCCATATGAAATAAATGATTTTGTTTAAGACTC
CUFF.27117.1	chr24:11214078-11227142	-	AGTGGGCAGGTGAGAACCTGTGAAGCAAAGGACTGGGTAGCTTTGGAGATCTGAGCACTGAAGCCCGAATATACTTAAAACGCGTTCGCAAGAAATATCTTCTCTTGATTGCAGCACTTATTAGGTGAAACATCTTTAAGTAAAGACTCTTCCTTCATAATTCCTGTAACCCGGCAGGTACCTATTACACCATTCTTGGGCGAAGGTTATTCAGCACTTGTGACCTCTCCCCTTCGAACTCTCTGCAAATTATTATCTCTACACTCCCAGCTGACACCCTGCCGGAGGCAAGAGCTACTAAGCCAACT
CUFF.27157.1	chr24:19816363-19818507	-	AGCGGGTGCCAGTTAGGAACGGGGTTTCTGATCTCCTCGTTTGCGTTTTGGGGGTTCTTTTTGTTCATAGCAGCAGACTCGAAAAAGCGAGCCGGCTTGGAGGAAGTCCGCCCAGCGATCCGAGTGCGCATTGATCAGTGTCGAGAGAAAAAAAAGCTACATAAATATATATTATCCACGACGCCGCCAAGCTCTCCAGCGCCGGAGGAGGCCCCGAGGTTCGCTGCCCCAGGCCCGGAGTCCAGCCAGGACACCTCTCCCTGACGATCCCGAGCCCAACCCTAACAGCAAGTACAGTTCTGAGAATTGTGGAACTTCATCCTTTCAGTTTAAGACACTCCTGCCTTTGCTTGATGGAATCTTGTGACACATCAGCAGAGGCCAATAACTTTGTTCAAA…
CUFF.27157.2	chr24:19817043-19818507	-	AGCGGGTGCCAGTTAGGAACGGGGTTTCTGATCTCCTCGTTTGCGTTTTGGGGGTTCTTTTTGTTCATAGCAGCAGACTCGAAAAAGCGAGCCGGCTTGGAGGAAGTCCGCCCAGCGATCCGAGTGCGCATTGATCAGTGTCGAGAGAAAAAAAAGCTACATAAATATATATTATGACAGCCTCTTCTCGGCTTCAGAAACCGGACAAATAAGATAACGCGCCGCTCCCTCGCGGGTTGCGGGGCAGAGCTGATGGTGTGACCCTGGACTGGTCCCCGTCGGTCCCTTTCCGGTGTTTTGCGTTTCTCTCTCCTTGCCCTCGGCTTACGTGACGTTACTAGACGATATGTTTAAAATTTAAGTTAAAGAAATGAGACCCTAGCTGCCTG
CUFF.27215.1	chr24:22170063-22192734	-	accaccaccacTCCCTTTTTATCCTGGTGTGAAACAATGGTAATTTGATATATGGTATTTATATTGGCATTTCTCAACCCAGTGTCACTAGATGTCACACACATTTGTGGTGCTTTGATGTTTGCAAGTCTAACCTCTGTGAACATAAATTTGGTCAAATAATAAATTGGAACAAAGGGAAACAGATAACTTGATATGAAAGCCATATGACAGTGACTTGTTTCATGGGGAAAAACACAGAGTCAGTTTCTCCCTCCACTCACAAATGAAAGGGAAGAAAAAAGGAATCAAAACTAGGACTTCAGGGCCTAGCAGTGTTCATCCATCAGCATGTTAGACAGCCACACAATATGTTGTTTTGGAAGACATTCACTCAAGGAGAACACCATCGCGACGTGG…
CUFF.27223.1	chr24:22373676-22375348	+	gtgtgtgtgtgtgtgtTTCTGATAATAAGTGGTAGAGAGTGAAATTTTTGTGAAGTGAATCTTTGATCCATGAGAGTATAGTTAAGTAACAGGACAATTATTATACTCAGGACACTAATTTTACTTTCAGtttttggccacaccatggggcatgagggatcttagttccttgaccagggatcaaactcatgccccctgtagtggaagcacagtcttaaccactggatcactagggaagtccTGATGTGAAATTGCTTTATATAAAGATAAGACGGCATTATAGGAAGCAGGTGGAACAAGGTGATGGAAAAGCGAGATCCTGGTACAAGCAGACAGATCCTGATCAGACATTCAAATGAGCTTTCGAAGGAGTGGAATAGTGCGTGTCAATAAGCTACT…
CUFF.27235.1	chr24:23643853-23680650	-	ggctcctgtactgctcccttctccgatgtccaaggagatttttctcagctacatgctgtgggaatgtggttgagctcctggagtgaatgtcacatgttgcaaggggccctctgactcggtccctctggattttgtgactctcagactcgtccactctgagcctcctgcaattcaccagtctcagtcctggttctccttctccagtgctggttcctaccatggattctactccttggtctctgcccagGAGGACTCTGAGTTTCATGCAAACCAGATCAATCTGTTCGGATAAACTTGCAGTCCACACTGCATCCCCTTTCACACTCTTTACTGGAAGTAGACTCTGCTGAAAGTTGCTTTCACTTGATTCTAAGCACAGGGCTGGTGGACTACAGCTGC…
CUFF.27296.1	chr24:29341485-29343730	-	AAGAGGGAGAAGGTGGGAGGGAGAGATGGAGAAGACCACTCCCCTTCCCACAGCACGTGGAGCTCCCTAGAGTCAAGCACCACTCCTGAACCAAAAAGAGAGTCATGACAAGAGTTCTGAAGCACAGTGGCCCGGATTTTAACAGAGGCCAGTGAATGGACCGCTGTTCCAGGTATCAGGGGATGAAGGAGCAAGTCTGCAGAACACAGTTTAAAGTGACAATTGAATAAAAATAAAACCTTTTCATATTTGCCTCCTCCCCTGACCCACCCCACCAAGTGCAAAGCCACTTCAGTGAACACAGAGGAACAGATCCGGAGAGAAGAGCTGCTGAATAATGCAGTGACCAACTTCCGGGAACGAGTCCAGTGGGGCCGGttttgggatatgatcgacatg…
CUFF.27297.1	chr24:29342085-29343730	+	aggtggctcagtggtaaagaaactgcctgcaatgcaggagacacaggttcaatccctggatcaggaagatcccctggagaaggaactagcaacccacttcagtattcttgctgggaaattccatggacagaggagactggcaggttgcagtccatggggtgacatgactgagtgactCAGCAACAAGAACACAGCAAGGCCACTGTCAGAATTGGCTTCTTAAAATGTCAAGTGACGGCCCCGACATCAGTGGCATCGGAGGCCGCTCATTACTTCAGAATAACAGCAGCGCTTACCAGTCTCTGCTCTGAGTCTCTGCCCACCCGGCTCCCACCAGTTACCTTGACTCACCCGGCCCCACTGGACTCGTTCCCGGAAGTTGGTCACTGCATTATTCAG…
CUFF.27363.1	chr24:32464473-32488601	-	GGGCAGGAGGAGGAGATGAGGCTGGCCAGGCTCTTATACAACTACCGTCCAGACTCTTGTACAATGGTGCCCATTGCTGGCAAGCCCCACCTGGGTGTTTGCTGGGAGGTGTTGAGGAGGAAGGCATGTGTCTCTGCCCATGCAGGATCCTTCTCCGAGACAGAGACGAAGCTGAGGTGGCCCCCACAGTCCCTAAGTCTCCTTCTCCTGGATGGTGGGGCAGAATGCAGGCTTGCCCAAGGCTGGATGGTGAACAAGAGACATTTGTGACCATTTGAAGTGGAACGGGCAGCTTCCTCTAGGAGCATCATTGCATTTAAAAGGGATATTCTAGAAATATAAATAATACCAGACCAAAGAATAACTCTAGTTCTGACACGGCAAATGGTGGTTTAATGA…
CUFF.27380.1	chr24:33325191-33329322	+	tcacagccccagtggaggtgataagcatataagtaaccgtaagggggtaggtgtggcaacagcatagagcccagggcctaaggtggtagacattccatgagctcaggaaaggctcggtgaagaggtgggatttaagctgcctatgagggtggagaggacgctggtaagtggcagtgagcagccaagcgggaaggtgttccaggcagaggaaccagcaccagcaaacacacagaaaccagctggcccatttaaacaagagcaTACAGAAGCAACACTTGAAAGtgttggagaagattcctaacagtcccttggacagcaaggagatcaaaccagtcaatcctaaaggaaatcagtcctgaatattcattataaggactgatgctaaagctccgatacttt…
CUFF.27443.1	chr24:35526054-35528961	+	AGTTGGGGCTGTGTGTGTTGAAAACAAACTTAGACTACAAGACTCCCTGGTCATGGATAGAACAAGCAAGCTCAAAAAAATTTCTCTTACAGCATCTGGCTGTGCAAAGAGGTCGAGGACAATTAAGTGGAGGCTGCGAGTAAGTCTTCCGCGGGGCAGTCAGGGGCGCTGTGTCTGTTCCTTTACTAGAGCCAACCTAACAAGT
CUFF.27517.2	chr24:38321672-38341737	+	gaggaggaggCAGCCTCGTGTGGGATGCTGGGTGAGTCCCCTAGCGTgaaggaagaagatctagtttgaccaaatctttctcaaagagagaacttcactcagagagactgcaactttcatggcgccaggattccaagttgtctgtctggactggagtcgggatctcaagagGTGAATTTGAATAAGTTGGCAAAACAAATCCCACTGTCCTGACAGTCCCAGCAATGGCTTTGGGTCACTGCATCTGTGTGAGAAGAGAGGAGGCCATGAAGGGTGAAGGTGTGTGATTCATCTAAGTCGAGGCTACATCTGTGCTTTTCTGCTTAAGTGCAAGCACTCATGCTCTCCTAACCGCTTCTCATCCACTGGCAACATTCAGAGGCCGAGAAGGACCCCGCT…
CUFF.27517.1	chr24:38321672-38359156	+	gaggaggaggCAGCCTCGTGTGGGATGCTGGGTGAGTCCCCTAGCGTgaaggaagaagatctagtttgaccaaatctttctcaaagagagaacttcactcagagagactgcaactttcatggcgccaggattccaagttgtctgtctggactggagtcgggatctcaagagGTGAATTTGAATAAGTTGGCAAAACAAATCCCACTGTCCTGACAGTCCCAGCAATGGCTTTGGGTCACTGCATCTGTGTGAGAAGAGAGGAGGCCATGAAGGGTGAAGGAACAGATGCCCAAGATCATTTTAGACAACTCATTGAGAATCACTGTGGATGAAAATTATTAGAGAAGCCAAGACTGGGGATGATGCCCTTGGATACCTCATCTAGGAAACTGCATCCCC…
CUFF.27523.1	chr24:38380664-38722659	-	gctggagattgttggccactgactcgatggacgtgagtctgagtgaactccgggggtttgtgatggacagggaggcctggcgtgctgcgattcatggggtcgcaaagagtcggacacgactgagagactgaactgaactaatggtatgttaatcattcccacctaaggaagcctccataaaaacccattcgggcagcctccagagaacttccgggatagtgagcacggggaggtgctagaagagtgatgatgtcagagagagatggaagcttctcgccttttccctgtgtgtctggtcttgagcatgtctcttacctggctgttcctgagttacagccattataagaaacaggtcagcagGTGAATGGTGCTCTTGAGCACCTTCTGCAGGAACCACTC…
CUFF.27523.2	chr24:38409323-38652093	-	AATTCGGGTATATATGAGAGCAGAAAGGACGTGATAGATGACGAGACAAAACTGAGAGAACAGTTGAGCATCACACACCAAAAGGCACATCGGGTTAAAAAACAAAAGCTGTAAAGTTTGGATCTTTTCCTGCACTGGAAGCAAGAAAAATGGAAAATTGATCATCAAAGCTCTGctccagttttcactacaactttcaggaaatacctgggacagaggaacatgttacatggcaccagaaaaatggaaataacaaaatccaggatttgaaaaaTGGAAATAACAAAATCCAGGATTTTTGGAATCACTGCAATTCATATTTCTAATCCATTTTAACTAGTCAAGGTTAACAAAAATGTATATGCCTGATCATTGTAATTCATGTAGAGGTAatcatga…
CUFF.27523.3	chr24:38411235-38722659	-	gctggagattgttggccactgactcgatggacgtgagtctgagtgaactccgggggtttgtgatggacagggaggcctggcgtgctgcgattcatggggtcgcaaagagtcggacacgactgagagactgaactgaactaatggtatgttaatcattcccacctaaggaagcctccataaaaacccattcgggcagcctccagagaacttccgggatagtgagcacggggaggtgctagaagagtgatgatgtcagagagagatggaagcttctcgccttttccctgtgtgtctggtcttgagcatgtctcttacctggctgttcctgagttacagccattataagaaacaggtcagcagGTGAATGGTGCTCTTGAGCACCTTCTGCAGGAACCACTC…
CUFF.27523.4	chr24:38565777-38722659	-	gctggagattgttggccactgactcgatggacgtgagtctgagtgaactccgggggtttgtgatggacagggaggcctggcgtgctgcgattcatggggtcgcaaagagtcggacacgactgagagactgaactgaactaatggtatgttaatcattcccacctaaggaagcctccataaaaacccattcgggcagcctccagagaacttccgggatagtgagcacggggaggtgctagaagagtgatgatgtcagagagagatggaagcttctcgccttttccctgtgtgtctggtcttgagcatgtctcttacctggctgttcctgagttacagccattataagaaacaggtcagcagGTGAATGGTGCTCTTGAGCACCTTCTGCAGGAACCACTC…
CUFF.27520.1	chr24:38723976-38731782	+	GTGTAGGGGCTTGGTTAAGAGAAACAGGTAGAGAAGCAGGTCAGCATAGAGAGAGTCAGCTATTGGAGGAATTAAAAAAAAAAAAAAAGTAAAGAAAGCTTGAAGGTGCGTGGAGCCACAGCTCCTATTCTGTAAGCATCCTGGATTTCCCAAAACCTGTCTGTTCTCCTTCTGTGCATAATTGTGTGTGTAAGTACAGCCTAGTTATTACCCATTCTAAGTAGCAATTTGATGTGAGCTAAAAGCTCTAAGTCGAGTCTCCGAATGGCTCTGAGAACATCACTGTCAAAGCCAGCTCTGTCTACAGAAGGCCCTGGAATGCCAGCAAACCCAGGATCTGCCCCATATACACGGGCAGCTACGAACAGCAGTTCTCTTCTGCAGCACCTTCTTCTACTT…
CUFF.27540.2	chr24:39156475-39165935	-	tggagccccaaaaaataaagtctgatactgtttccactgtttccccatctatttcccatgaagtgatgggaccagatgccatgatttttgttttctgaaAGAGAATGTGCCTTAGATCCTCTCAACTGAATCCTCTCTACCGAACCGTTTAACCAGTTTCCTCTACACGCCTGATACTCGTGTTTAAGAACCAACCTCCTGCACACTCTTGCACTAATGCTCAACTACTTGTTGCACGTGTGGCCAGCGTTGTTGGTGGGCACTCATAATCCCTTAGCATTTGCCGTTTTCCTCCACTTGTGTgctcagcccacacaaggatagctggaggcgccagggagctaggtccccaggtgaggctttcaaacgctgatggatggtaatggatggtaataagta…
CUFF.27626.1	chr24:43632447-43634625	-	AGGTGGAGGTGTGGAGCCAGAGGATGGAGTCGGTCGCTTTGCCGAGTAGCTGGAATCAGCCGTGGAAACTTCCTGAGCCCTTTGTGTTCCAAGGTTCCAGGAGAGGAGCAAAATTTCCAGGTCACCGATATTTGCCCTGCAGGAAAGCCTGGTGTGAGGGGAGCGGATGGTTTTAACACTTGAGATACAGAAGAACATCCCTGAAAACAAcgtgctccacaacaagggaagccaccaaaatgagaaggctgcgtgtggcaatgaaaacccggcacaactgat
CUFF.27694.1	chr24:47560073-47563327	+	TGGAGGTGTGGACTCCTCTCTTATAGGTGGCTGGAGACACAGAGTCAGCGGGACTCAGAGGAGGGTGTTGGttggtgagacaaagctcaaggtcataagggaactggtggcattgcgtttgaccccaaacaatctgaatctagagctttgctctcaagtacCGCTGCTTCCTTCACACACGTTTAACAGAATGTGATGCTTTCAGCCTGGTCTGAAATTCACTTTGTAGTTGCAGCATCTAAGTGATCTGTGTCCTCTGCAAACTTATTGTTCAAAAGTAGTGTGTACTGTGTGCCAGGAGCTAATGTAGCCTGTGGTTAGAAAAGATGCTGCTGATCCAACATTACTAGGGCTCAAAGGGTTGGACTGGTTTTGTGTTAGGACATCTACACTCTCTGA…
CUFF.27746.1	chr24:50474902-50493489	+	TGggggcttctctccctgtgactccttcgtttccaggattccatcctatttccagtcactctggtattcccaaggtctttcctctgatactttgaaccaagGAGAAGGAGACGGGACTTCAGAGCATTCACTACAGCAAGCAGCTGGATTCCTTGCTGAGCACTTTTGCAGTCTAATTAGGGGCTTACAACAGTAATTGAAGGGGACCTCAGTGAGGGTCCGGATCAGGATGTTGGCCAGAATTGGGGAAAGAGAGAGGAGCCTGGAGACTCTCTGAAGAGATACAGAACGGAGCTTAATGATGTTGCCACGGCTGAAGATAACAAAAAATGAAATGCTTCCATTTGCTGCCCAGTGGACATGCTCAGGGGACACACATTTTGAGATTGATTCTCTGCA…
CUFF.27761.2	chr24:50765855-50766338	+	AGGGCAAGGTGGGAGAAAGTGGCTTGAGTGTCAGTCATCCCAGCACCAGGAGAGACCTGCAGGGAACTTGGAAGCTCTGCAGCCAAGGAAGTGAGGCTACAGatgaaagccagagtagtgtctgatacctgcaacttaatctgcctgGGGCAGAGTCCACTCACCCTGCTTAGATAACTGATCAAACCTGATGCTGATCCATTTCAGAGACCGCATCccagccttttcactgattctctgtgctccccagaactcttccagtaaatgccctttgctttgccaaaattgctttctgttgcttgcaaccagaaaaccccaaccg
CUFF.27786.1	chr24:51422872-51424000	+	tagcaggtaggcagcggatggtcccgtctgaagctcagcagagaggctttggctggagatgtgtctttgagagtctctggcacaaaaagggtggtgggatgtttgagatcgccaagggagaaaatgatgagtgaggagggcccaggtcccagccctgatcaattgcactcatgttcagatggaagacaggagccagcaacgcagatccaggaaggcagaaggaaagcagggaaagtgtggtgtgaagtcacagaagccacaggaagacagtttctccaaaagcaggacgtggctgctgagagagctaATGCCGAGATGAATAGGACATGAGTCCTGTCTGCAAGTTGCTCACTGGGGACAC
CUFF.27793.1	chr24:52095785-52115776	+	TGAGCACCTAGCTGTTAAACTGGGGTGTTTTTTGGTGTGATTCGAAACAAGTATTACAAATCTTTGGTAGTGTTAGGGGTGTTTTATACTTGGACTGGAATCTTTATCAAAACGTTTAGAAGTAAATATTAAAATTGAAGACAAGATAATGATGATTTAATCCAGCAAAAGTAACATAAATTTGTGCAAGAGTAAGTTGAATAACTTTTTAGGGCCCCAATTAAGAGACCCCAAAAGGTCAAAATCATTTGGTTTTGAGGAGGAAAAAAGGGAGCAATTATACTAGCTGATGCGGCTCAGGTGTGAATAGTATACCTAACACGAAACACAGGTGAAACATACGTGGCTACTTAGCGAAGAAGGGAAGCTGCAGAATTCTATGGTGTCTCAGTGAATCCG…
CUFF.27814.1	chr24:53617526-53619239	-	ATACATGGGCAAAAAGAGATGAGAAAAGACTAGAAGAGAATGTTACTAAATTCTCGACCACATAAACCAATTTCCAAGATAGTAAACGTTGTAGGGAAGTGTGATCACCAGGGCAGTAAAAGCATAGAAAATGCCATGGGCCTTGAACAAAACCTTGAAACATAGATAGCTTATAACTAAGCAAAATAAAGGAGGCCTTTCTGGTTGAGGAAAAAGCCAAGATCTGGCATGTTAGATGTTCAGTAATGAGACAAACTGACCTTAGCAGAGGGTACTTGCTATAATGTTCTTTATTATTCTGTTTAGTTTCCCAACTTTCCTTTAGCAAGTCACAGCAGAAGTTTGGCAGGATACAGACCCCTGGACCATGAAATCAAAGCAGATAAATGCAGAAGAATA…
CUFF.27815.1	chr24:53619932-53632739	-	TTACCAAAGCAGAAGAGATACTACAGTATGCAAGGGCTGAAAATGGAGAAGGAAGAGTCCTTACCACGCTTAGCCCTGATCTGGCAAGGGAAAGGTGCCATTACCACAGTCCCACGTAGAGTCATGAATTTGAAAGGAATGGTGACTTTTGGCCCAGAGTTGCCGCTATCCTGATGTGAACACTCAGAAAGAGCTGGAAGACAGATGCTCCAGCCATCACCCCTCCTCCCATCGGATTTCTCCCCAGGGCTCTGCAATAACCAAAATCAAAGAGAATCTCAGACCAGATTTTCAGGAAGCAAATGCATCTCTCAGCTTCACAC
CUFF.27824.2	chr24:53734249-53937805	-	GATGGTGTAGACTCTGGAGGTGGAAGGTACATATGGGCTCTGCCTTCTTGGTTCCCAGatgaagagacagaaggatttagaatctcattaaaggttttggagctgataagtggcagagctgaaatttgaatccagggagtttcacaaaatgagcttggctttcttaactgctaagctgtactCTGCATATTCTTAATTTCCCATTACACTCTCCCCCGTGAAGGACTGTGGACCATGCATGATTGaaaagaacctggcacccagaccccaagaagatggttgttttgaggtgctatcctgccatcttctcagtctgccggctccctgattacagtctcttccttgcctcaacacctcgtctctcggattcgttggcctatcgtgtggtgagcagagcga…
CUFF.27824.3	chr24:53734249-53937814	-	AGGTGTGCAGATGGTGTAGACTCTGGAGGTGGAAGatgaagagacagaaggatttagaatctcattaaaggttttggagctgataagtggcagagctgaaatttgaatccagggagtttcacaaaatgagcttggctttcttaactgctaagctgtactCTGCATATTCTTAATTTCCCATTACACTCTCCCCCGTGAAGGACTGTGGACCATGCATGATTGaaaagaacctggcacccagaccccaagaagatggttgttttgaggtgctatcctgccatcttctcagtctgccggctccctgattacagtctcttccttgcctcaacacctcgtctctcggattcgttggcctatcgtgtggtgagcagagcgagcttgggctcggtaacagccttg…
CUFF.27824.1	chr24:53734249-53939786	-	cgcagcccagagagagcagtgtgttgttaagactctgaactgcattagtgcctgaaccccacggaggcctttgtggaaacctgagattctggcaggaggctatgaagatctactggactggcagccacctaaaatcaagcctcatgaagagacagaaggatttagaatctcattaaaggttttggagctgataagtggcagagctgaaatttgaatccagggagtttcacaaaatgagcttggctttcttaactgctaagctgtactCTGCATATTCTTAATTTCCCATTACACTCTCCCCCGTGAAGGACTGTGGACCATGCATGATTGaaaagaacctggcacccagaccccaagaagatggttgttttgaggtgctatcctgccatcttctcagtc…
CUFF.27852.1	chr24:55034963-55037208	+	AGAGAGGTGTGAGCAAGAGCGAAGTGAGTGTCAAAGgagacctaatcaaattgtctgctgagagatcgctggatatactttttgatgatagaccaccacatagcttcaaaggaggtcagagaatcggggatactgcttcaacagagctccttcccttcctacctgtgcatattcatttaagcctcccagatggctcagtgataaagaatccacctgccagtgtaagagatgcaggttcgatccctgggccaggaagatcccctgagaagggaatggcaatccactccagtattcttgcctagagaattccatggacagaggagcccggcacgatacagtccatggggtcacaaagagtACTACACAGtacatttaaaagaatgatgaacttgttatatt…
CUFF.27880.1	chr24:55678873-55682355	-	gacacgactgaggaactccgcgcacatgcTCGCAtgatccaatatagctagtcttcctacaagatagcctggtgagacagaaacacacagggaggaggttttgtgacgaagaaggcagagactggagtgtgaagcagctgggagtgaaggaatgccaaggattgccagaattcaccaggagctggagagaggagacatcagcttgatccctggtctgggaagatgccacatgccgcagagcaaggaaacctgagtgcctaaacgactgagtccatgtgcacaactacggatgcgcatgcgccgtggaggccgagctctacagcaagcctctgcaatgagaagcccgccaccaccagcagaggaggcccGCGTGCAGCCAAAAATAAAATAAACGAACAC…
CUFF.27882.1	chr24:55684363-55693037	+	actgagccacctgggaatcccAAGACCAAGACATTGCCAGTCAAAAGTTCCTAGATGAGTTGGTCACTCTAAAGGAGAAACAGTATGTCCTCCAGACTCCCTTCTGACGTGAGGGCGCCAGGGAACACTGCTCATCTGCTCCACTGTGCTCCCTCTGCTGGCTGTCTCTGAGGGGATGATAAAGCCACTTTCACATCCTCAAGGCACAGAGCAGAAAACTCCCAGTTAAACCACAGAGTTCCATTAAAAGTTGCCACCCGTATTCAAAAGCCTGATTGTACACCTTGGGGTTCTGCCGAAGAAGCACTTACAGGAGTTCAGAGACTGGTGCCGTGTAGTAAAAATGAATCGACTTTTAGAAACCACACAGGATGCTCCGTCTTTGGTAGGCACAGCTCT…
CUFF.27882.2	chr24:55684379-55693037	+	atcccAAGACCAAGACATTGCCAGTCAAAAGTTCCTAGATGAGTTGGTCACTCTAAAGGAGAAACAGATAAAGCCACTTTCACATCCTCAAGGCACAGAGCAGAAAACTCCCAGTTAAACCACAGAGTTCCATTAAAAGTTGCCACCCGTATTCAAAAGCCTGATTGTACACCTTGGGGTTCTGCCGAAGAAGCACTTACAGGAGTTCAGAGACTGGTGCCGTGTAGTAAAAATGAATCGACTTTTAGAAACCACACAGGATGCTCCGTCTTTGGTAGGCACAGCTCTGTCTCCATCAGCACCTCTTAAGTAGCAACCCGACCAAGCACCTGGTTCGGTACACAGTGACAGTTCACTGTCTCTCCGGTGGTAACAATTTAGAGGCATGATGCTAAACAA…
CUFF.27884.1	chr24:56037866-56039788	+	GGGCAGCTCAGCTCGGCTCCCACCGAGACTTCTAGAGAAAGCTTCTATTGCTTAGAACACAAGTCAAGACAAAGGCAACCACAACATTTTCAGTGAACTTCAAAAGCTTTTGTGTCCCTGTGATGAGTTGGTGTGTTATCCTCTGTTCATGCGATTGGAATCACGCTATGAAAGCTGAGAAAACTGGTTCTGAATTTTTTAAGAGGTTCATCATGTCCCACCAGAAAACTCACCCATGCAGAACAGGAATGTGTGCCTTACAGCTTCTGTCTTCTAAGAAAAGCGTTTATTGCTGGCTGAAGGAAAGGCTCTGATTGCCAGGGTGTGTTCGTTCTCCAAGGACACTGAGCATTTTCCAGTTCTGAATCTTGCGAGTTGTGTTTCAAATAAAATGTTTCT…
CUFF.27898.1	chr24:57241397-57246707	+	TGGAAGCAGATTTTTAAAAAGGGTTTGAGACAGGAAGAGAAATAAGGAAGAGCCTCCGTGGCTGCTGCTCCATCCAACGACTCACGCGGTAATCTTAAAGGTGAAGATTGTCTTTAATTTGTGCCTATGCAGTTTTTCAAAAGAACACGGAACAGAGCAACAGAAACCTCAACAGCTACAATACCAAAGATGAGGATTTCTCACACCTTTGCTTCAGTTCATTATCCCCTCTTGCCTGGCTTAAATACTAATAGCGCCATTGATCTGTGTGTAAAGAAAGCACTGCAGTTTGTTTGCTGTCAGACGGACAACAGAGCAAAGTTTGTGGACAAGCAATGACTATTCAACCCGAACCTGTGCATTCAGAAAACGCATGCTGAGACCCTGCTTCACCAGCCT…
CUFF.27957.1	chr24:58836070-58840067	-	AGACTGGGGGAGTGGAGTTAATGAGACCAAAAAAAAAAAAAGAAAACTTATAAAGTGTAGCTTGACAAAAACTCAAGCCGCCATCTGTGTGGATCTGGAAGGGTGAAAGGCACAGGTTTGATGGGAAAGAAAGGGGGCAACCGAGATACTTTCTGTGAAAATTCTTTCCAAAGCGTCTTCCGGGGTTAGTAGCAGAGGAATAAGCAAGGCACAGTGAAACGTGACGATGCCAAGGAAGCATGTGTCCTTCCAGAAACCCCTTCTTGAGGGCGCCGCACCTGGCTTGCCAGCTCCCGTTCTCACAGGACCCCATGGAAGGGAAGGATGCCCTGGAGACTCAGAGGGATCAGACATTTAAAGCTGACACAAGAGGACTGAGAATGAGAGGGAAACCTGCAA…
CUFF.27957.2	chr24:58838576-58840067	-	AGACTGGGGGAGTGGAGTTAATGAGACCAAAAAAAAAAAAAGAAAACTTATAAAGTGTAGCTTGACAAAAACTCAAGCCGCCATCTGTGTGGATCTGGAAGGGTGAAAGGCACAGGTTTGATGGGAAAGAAAGGGGGCAACCGAGATACTTTCTGTGAAAATTCTTTCCAAAGCGTCTTCCGGGGTTAGTAGCAGAGGAATAAGCAAGGTAGGATGGCTCTTCGTGGTCTTTAATTATCATCATGAGCCTGAATTCAGGCTAAACACTTTATGTTCCAACTCTGACTCCCTTTCAAAACTGTAGAGAGAGACTTGCAGGGAGACGGGCCTGCATCACACTGACCTGGGTCCCTCCTCTCAAAACACAAGCTTTTCCTGAGCCCTTTGTTTGAGACTCGT…
CUFF.27996.1	chr24:59513151-59557157	-	CCAAGCAGGAGCCCGCCGAGTTTCTAAAGCTCAGTTCAGTTTAACGTTGGCCGGGACGGGAGTGTTTCCCGGAGCAGTTCTGTCTACAAGAACAGCGTTAAGAAATTTGAAATCATCTTTGCCATCAGGCCAGTCAGGAAAAAACAAATGCAAGACTCGCCAAGCAGGATCATCAGAACTCGGTCTTCTGCCTTCAGTGAATCTTAAGCCCCAGCAGCACAGCTTCGTTACTGCCACCGAGCAGGCATTCAGTAATGTCATCTAGGACCCGGTTTCCTTCGGTCTGGACGCTCTGTCGTCCCCCGTAAGTCAGGCTGAAGGACAAGGGTTCAAAGGCCAGAGTGGGAAGTCACATCAAGGAGGGACTCACAGGCGTGCCTTTTCCTCTCTGCACAGAGG…
CUFF.27996.2	chr24:59513151-59557157	-	CCAAGCAGGAGCCCGCCGAGTTTCTAAAGCTCAGTTCAGTTTAACGTTGGCCGGGACGGGAGTGTTTCCCGGAGCAGTTCTGTCTACAAGAACAGCGTTAAGAAATTTGAAATCATCTTTGCCATCAGGCCAGTCAGGAAAAAACAAATGCAAGACTCGCCAAGCAGGATCATCAGAACTCGGTCTTCTGCCTTCAGTGAATCTTAAGCCCCAGCAGCACAGCTTCGTTACTGCCACCGAGCAGGCATTCAGTAATGTCATCTAGGACCCGGTTTCCTTCGGTCTGGACGCTCTGTCGTCCCCCAGGGAAGTCTCTTGGGAAAGCCCCCTTTCATCACGTCCCGTACGTTTTGTTGACCACACTGGATCATCGTCTATCGCTTGCTGAAGACAAGGGCA…
CUFF.27996.3	chr24:59522131-59557157	-	CCAAGCAGGAGCCCGCCGAGTTTCTAAAGCTCAGTTCAGTTTAACGTTGGCCGGGACGGGAGTGTTTCCCGGAGCAGTTCTGTCTACAAGAACAGCGTTAAGAAATTTGAAATCATCTTTGCCATCAGGCCAGTCAGGAAAAAACAAATGCAAGACTCGCCAAGCAGGATCATCAGAACTCGGTCTTCTGCCTTCAGTGAATCTTAAGCCCCAGCAGCACAGCTTCGTTACTGCCACCGAGCAGCTTGAAATCAGAGATTAACCCTCATGGTGTTCTCAGCATCTGGAGAGGTTAGTACAAGGACGGCCTCAAGAAGTGAAGAAAAGCGTCTCCGCAGTTTGGACATTGAAACCTACTTAAAGGACCTCGCGGAATGTTTCACCTGGAAATCTCTCTGT…
CUFF.27996.4	chr24:59522131-59557157	-	CCAAGCAGGAGCCCGCCGAGTTTCTAAAGCTCAGTTCAGTTTAACGTTGGCCGGGACGGGAGTGTTTCCCGGAGCAGTTCTGTCTACAAGAACAGCGTTAAGAAATTTGAAATCATCTTTGCCATCAGGCCAGTCAGGAAAAAACAAATGCAAGACTCGCCAAGCAGGATCATCAGAACTCGGTCTTCTGCCTTCAGTGAATCTTAAGCCCCAGCAGCACAGCTTCGTTACTGCCACCGAGCAGAGCAGCTTGAAATCAGAGATTAACCCTCATGGTGTTCTCAGCATCTGGAGAGGTTAGTACAAGGACGGCCTCAAGAAGTGAAGAAAAGCGTCTCCGCAGTTTGGACATTGAAACCTACTTAAAGGACCTCGCGGAATGTTTCACCTGGAAATCTC…
CUFF.28013.1	chr24:61444649-61447820	+	CGGACACCATGCGCAGGAGTGCAAGCAGTCGTCCATGGAGCCCGGCCCACAAGGCTCTTACAGACTGAGATACGCACCTCCCCTCCCCCCTTCTAGTGACACGTTGGATTCTGCAGACTGAAACAAGTAAAGCTTGCCTCCTTAATACACTGAAGTGTGGGCAGTCATGGTGGGGTGTGGAGGGGAGGGAAAGGAAAGGTGTTTTGTTTGTGTTTCTTTGTCTATACATTTCCTAGATTTCTATGCAGTTGAGATTTCTCATTTCTCTTGTACGGATGGCCAAAACAAAACAAGAATGCATTGCTTTTGAGCCTCTGGTCTCCTGGTTCAACAACAGGCTTATCTGTATGATACATGTAATTTAAACCTTCAAACAATCAAAAGGAAAATCTTGATGTG…
CUFF.28008.1	chr24:61448770-61450870	+	AGGGGGCCTGACACGGGCAACTGTTGTGGGAAACATCCTGAAAGAGTTACAGGATTTGTGGTTCAGTTAGTAAAACAGCCAGACTGCAGAATTGGGAGTTGTTGAAGGAAAAATTGGAAGTTGCCAGGTTTTAAAATAGAGACAAAAAGAAAAAAATGTGTTGACATGGTTTTTTAAACTGTCAGATGGTTGAGAGAAAGCCTGGAAGTTGAGAGATGGGTTAGGGTAAGGGCAGGACAAGAGGGGGATGGCAGAGGCGGATGGAAGGACCCCTGGGCTGCAGAGCTGCGTTTTACCACGTGGATGACAAGCTTAAGTTATGGCTCCGAGGATTAAATAATAATGGGCAGGGTCCAGCACCATGAAATAGCACCAACGAGGCACTCAGATGTCAGCAGA…
CUFF.28128.2	chr25:2728435-2733290	-	ATGCGGGGAAGAGTGGCCCCGACCAGgaagtgaatccatggctttcatcaagttctctaaatgatgaaaaagattagaaaacactACTTTAAGGCTTGGTAAAAAGTAAGAGAAATTTTGAGATCAGGAGAGAAAATGAAGAAGCTTCTTCAAACTAAAAAAAGAAAAAAAACCCTGCGAACTCTGCATCCATTCATTGTTAAAAGGGGATGTGTCCCATGGTTCTATTTTACACAAAGAAAAAGACTAAAAACATTTAGAAAGTTAGCATGGAAATCCCCAAAGCTTATAGATCATCATAACCCCTCTACAGAGAGAGAAAACCCTAAGAGCTCCAACCTGGAAGAACCTCTCGACATCGTAAGACCTACTGAGCACCAAAGGATTCATTCAGGAAAG…
CUFF.28173.1	chr25:3562349-3569193	-	gaggcgagaggcatcttaaccactgagataacgtggtcggtgctatcgaaggtataaacagtgttacaggcacacaggcgagggggtttctccgacagattggtgtcagggaaggcatctaagaggcaacatttgagttggactttggtgaaaactgcgccaggttggagtggaggggaagagtgttctaagtagcaagaacttcaaaagcagatgcgaaagtacTTGCCCTGTACGCGCTAGGTAAACTTGGGATATATGACTGGAGATGAGTCTAGAAAGAAGAACCTGGCCTGGTTAGTCCTGCAGAGGGGTTTCCGCTTTCACACGCCCACCACCACCACCCCTAACAATAGAAAGGaacctgaggactcctggatggatctaagCACAAGCGAT…
CUFF.28210.1	chr25:4132746-4133070	-	TGGTTTGACCCTGTATGCCCTTTGGTTCCTCAGAAGAAAGGCAGAGAGCTGACCAAAACAGCACAAGTGAGCCAGTACGCATGACCGAGCTCTAACATCGTTCCTTCAGGACCAAGATCCAATCATCTTACATCAGATGTTTCTACCCCAGGATGCTGTGACTCAGAGGATTTATGCAACATCTCAGACCCAGAAACCTTTAATTCCTTGTAAAAACACAGCAATAACCACAGTTCAC
CUFF.28232.1	chr25:6804771-6809563	-	tggggtctcttcttgtgctctgtgtTCCTGGCGGTTTGCAAAGCAAAGTGTGGCAAGCCATCCTGGAGACTGAAGTAATGGTTCTTGGGAAAGAGGCATTCGCAGAAGGGAAATCCCGGGCTGGCCATCGACCCCTGCGTGGGGAGAGGTGTCCTGAATGTCAGATGCGTGCAGACAGTTGCTGGAGTACAGGACGCCCCCAACATGCTGGCTGGTCCGATGCGCGTGTCTGCAGAGCCGCCCAGAGGGCGCTGCAGGCGGAGAAGCAAATCCCGGACGCACAGCCGGCTGACTTCCTCTTGGGGTGGAAGAGGCTGATGGCTGAAGTTTAAGTTAGAAAATGGGAAGAACTGGGGTCAGAGAAAAACTGCAGAGTCGCCTGTTCTGTTCATCCCGGGG…
CUFF.28232.2	chr25:6806702-6809563	-	tggggtctcttcttgtgctctgtgtTCCTGGCGGTTTGCAAAGCAAAGTGTGGCAAGCCATCCTGGAGACTGAAGTAATGGTTCTTGGGAAAGAGGCATTCGCAGAAGGGAAATCCCGGGCTGGCCATCGACCCCTGCGTGGGGAGAGGTGTCCTGAATGTCAGATGCGTGCAGACAGTTGCTGGAGTACAGGACGCCCCCAACATGCTGGCTGGTCCGATGCGCGTGTCTGCAGAGCCGCCCAGAGGGCGCTGCAGGCGGAGAAGCAAATCCCGGACGCACAGCCGGCTGACTTCCTCTTGGGGTGGAAGAGGCTGATGGCTGAAGTTTAAGTTAGAAAATGGGAAGAACTGGGGTCAGAGAAAAACTGCAGAGTCGCCTGTTCTGTTCATCCCGGGG…
CUFF.28318.1	chr25:10562413-10563706	-	CATCTTGAGGTGTGTTTGCTGGTTTCTGTTGTGAAAAAGCTGCATTTCATACCAGATAAGATCGTCATGATCCCAACTTTTCAAGCTCATAACCTGAGGAGCTAGCTGCTGAGACTACAGAGTTTATACAAATGCATCTGGCTTTTTTATTTTGGAGTAATCACTTTGTTCCTGGAACTCTCTGCAGTGGCTTTCTTTGCTGATCAGATACCTTTTCGTCTAGCAATGATGATGGCTATTTCTGGAACTGTTTCTATTGTCATTCCTGCAATCTTTGCCTTGTCTGAAGCTTGTCAAAACCCAGAAAATTCACCTTTAAGCCTAGAAGAATTATCAAACCTTAGAAACCCCCAGAAGCTTAGAAATAGCAATTTTGAAATGGGAGCA
CUFF.28336.1	chr25:11366659-11373130	+	AGGTGTGTCTCAACTAGATTGTAACAAAATTACCACAGCTTATTCCAAAGGAAAATTTTAATACAAGAGATTTTAGAAAATTAAACACATTTGTTTAAAAATTCTATCCTGTAAACCGTAACGGAAGAGGGTAGTTAAGATAATACCACGTGTTTTGCAGCCCATCTGTGGGCTTCTCAGCCTTGCTTCCATCCAGACCATAGACTCCAGATTTGTCGCCGGTTCCCCCTCGAACAGACGGCTCATGGGGACCCACTCACGGGTCACCATGGAGCCTGTAGTCAAAAGAATTCTTCCACCACCAAGTCAGCATCTGATGAGTTAAGCAGTGTGTTTTACCAAATGGTGATGCTGGAGATGGTGCCGCTAAGGTTACAGAGGAGCTGGTGGTCTGCCCCT…
CUFF.28345.1	chr25:11412361-11425979	-	TGAGGATGTCCTGGGAAGCCAGAGAGAGCCTGAGAACTCAAGATGAGTGGTGATGGGCCTGGCTGTGTACCTCATGGGAAAAGTCATAGCAGGAACCGGAAAAGGAGGCCAGGACGGATCTATTGGAGGAAGAGCatgctgtgatgatgcgggacctacccagctaatctccccatcttagatcgactgacgggcatccttatctccatctgtaccctaagctcacccttaccacatggcagaacagactcatgttccagagattgggacgtgcacat
CUFF.28345.2	chr25:11419385-11425979	-	TGAGGATGTCCTGGGAAGCCAGAGAGAGCCTGAGAACTCAAGATGAGTGGTGATGGGCCTGGCTGTGTACCTCATGGGAAAAGTCATAGCAGGAACCGGAAAAGGAGGCCAGGACGGATCTATTGGAGGAAGAGCGACAAGACCTGTCTGATACGTCGGTTCTGCTCATGACCTCAAATGCTGTTGAGTTATTGGTTCAACTTCTTCACCTCTTCTGTAACAAGGGACTCTTCGGGCATGGCTCTGTCTAGACACAAAGGATTTCTTTGTGGGGTCAGGGTGGGGCAGACAAAATCTGAGGAAATG
CUFF.28416.1	chr25:14424261-14425923	-	gagaggtgagggatcagatgctcttaggccttgcggattctttactgtgagcctccagggaagcccAAGTTCCGCGTGGGACGAGGTAAACCAGCGACACCCAGGTGGAGATGTCGGCTCCAAAAAGTTGAGAATGTGAATGGAAAGAGAGATTTTTCATCCACCACCACGTTCCAAAGCCAAACTGAATATTCAGGGGGTTACTGAGGTGGAAGAAGGTTCAGGGCATCTCCGAGGCAAATAACAACACCAGGACAAAATGATCAGCAGGACTCCACGAACCATAACACAGAGCCACCGATCCCTGAAGCAGCAAGTACAGTAGCAAAAATTAACTAGAGAATTCCAGTTAGTGCATCACTTAAATTTACCGAGGGCCACCTGTATACcagggcttcc…
CUFF.28531.1	chr25:21490536-21491677	+	CAGCAGCGCTCACTAGTCTGTCACTTGGCCCGTGAGCGGGCTCGTCGTCATCTTCTTATGGTCCAGGATGTACTGACTAAATCTGTGTTAGCAAATTCAGACACTCCTTCCCCTTCAGTAGCATCACAGTGTTCATTCTCCCTCAGGCTTCTCTCCACGCGGAGTCCTCGCTGGGGAGGGGGCAGGACCCCTCGCGGGGCTCTGAGGGTGGACGGGGGTGAGGCTGCCTTCTCTCGTGGAGCTGGCAGCCCTTTCGCAGGACAACAAGCCTTTCCTTCCCTCCCCTCCGCCACTTGGCAGACTAGTGACGAGGTATCCCTGCTCTCAGCTCTGTTTCAGTCAGCCTTTTCAGAAAACTGAGAGAGATGGTCTCGAGACTTGCTCCGACTCTTTGGTATT…
CUFF.28546.1	chr25:22301161-22303898	-	CCTGAGGTGGAGATACCCACAAGCCTCCTTTACCTGCACCTCTCATCCGTGGACCAGGACTCTTCCTTCTTACCACTTGGAAAACTAGAAGAAAGTATCAAAGCTTACCTTCTCCACCAGCAGAAAGTGCCAAGGAGACATCTCTTCATATTCAGGAGGCGTTTGAGATGGCTTATTTTGTAACATaggatgtgctctaaggaaccggctcagcagttgtggtgcacgggcttagtgctccatggcacgtgaggccttcctagaccagggatcaaactcaagtccaatgcattgacaggtggattttttaaccactggatcgccccagaagcccTAACTGAAATCCTAACACACCATGACTGTCTCTGATGAGAACCCAGCTTTGATGCATGCAGCATA…
CUFF.28678.1	chr25:27250525-27291750	+	CTGAGGCCTTGGGAATCCTAGCtttaaaaaaaaattattttatgaactcattatttttctttataatttaatattCCTTTCTAAACTTTATTCAtttattgatgtattatatatttttggctgtgctgggtctttattgctgcatgctggctttctccacttgtggcgcggggtactctttgttggggtgtgcaggcttcttgttggcgtagcttcttttggtagggtgcacaggccctagatcctgggctcggtagttgtggcgctcgggctttgtttctatgcattatatgggatcttctccgatcagggttcaaacccggatctcttgcattagcaggcgaattctttacccctagacagacccccagagaagctcTGAATCCTAGctttatcact…
CUFF.28790.1	chr25:30744997-30782894	+	tgggcgagctgggaggccttccaccgttttcttggtttgctagttttcccaaataaagtagttattccttccttcaacactcttctctggatttattggcctgttgtgcagtgagcagttaagagcacggacttggtaacaGATTTCACTGGGCCAGTCAAGGAGCCTTGCTGCTTGTGGCCAGCCTACCCCGGCTGCGGGATTCTCAAGTCAGGCCTTAGCAGCAGGACCAGGGACCACTTGTCCTGAGCATCTGCCCTTTAAAGTTCCCAAAAGAGGCCCCGCTGCTCTCCAGCACTTGACAGTTGGAACAAGAAATCAAGCCACTGGGCTCCATGCAGTAAGAAGCAAACCTATCTGAAACCTATCAGTGGCTGGCACGGGCATGCCTTATCACAT…
CUFF.28825.1	chr25:33560184-33565016	-	GATTGGGGGTGGGTTttgttgtctttgggttttgtttttgtttctctgttgtgtttttgtttGCTTTGCTGTGCAGCACCATGAGGTGTTTGGCGAAGAACGCATCATCCCAGTATTTTGAAATTCAGAGAGCTTCTGCAGAAAGATTCTTTCCTCTGAGACCAAACACCACTGTGACCTATGTGTTTTCCCCCCATTTTACCCAAGGCACTGGGTTGACCCTGTCCCCTGCCAGGTATCCCAGCAGAGAGAAGGACCCGCTGCCTCCAGGGCTTCCCCAACACCCATCTAGACGCCCCTCACAGCCTCGGTCTCCCGGTTGCATCGACCACCCTGGCCTCTGACCTACGCAGACCACTTTGCCTCCAATTTCCCAGAAGCCTCGAGCCTGAAACTTAC…
CUFF.28825.2	chr25:33560184-33565016	-	GATTGGGGGTGGGTTttgttgtctttgggttttgtttttgtttctctgttgtgtttttgtttGCTTTGCTGTGCAGCACCATGAGGTGTTTGGCGAAGGTAAGAAACCTGAACGCATCATCCCAGTATTTTGAAATTCAGAGAGCTTCTGCAGAAAGATTCTTTCCTCTGAGACCAAACACCACTGTGACCTATGTGTTTTCCCCCCATTTTACCCAAGGCACTGGGTTGACCCTGTCCCCTGCCAGGTATCCCAGCAGAGAGAAGGACCCGCTGCCTCCAGGGCTTCCCCAACACCCATCTAGACGCCCCTCACAGCCTCGGTCTCCCGGTTGCATCGACCACCCTGGCCTCTGACCTACGCAGACCACTTTGCCTCCAATTTCCCAGAAGCCTCGAG…
CUFF.29015.2	chr25:37715530-37729644	+	GAATGAGCTATCTTGTTGGCAGTGGGAGGGTAGGTTTCTGGCCCCATCTTTGAACTTGTCGAGGGGAGGTTAAAATCTCTTCTGGAAACTTGGGAAACCATCTTTCAAGAGTTTATCACAGGACATTGGACATGTTTTTCTGTGCTGCACAGCAGGAAGCTTGTTGTCCATCCCGTAGCCTTCATCAAACGCCATTCTGTGAGGAACTCCCAGGTTCACCCGACCTTCCCAGAGAGAGAGCACTTTAAGGCTTCTTACATGGAGAGGGAAGTGAGCCTGACACCGATGCATAACAATACAAATAGGAAAGAGAATATTTGTTCTCCCCAAATTTCCACCGTCTCTT
CUFF.29093.1	chr25:39133078-39144246	-	atggccatgtcactccccttcccctgcaggaggtatgaggcgatttttctcctatcttcaccttgagaaactggtcaagctctggaggtaaaactcacagaagtgtggggacctccctggagactctgagttccacacttgtccccactaagcctccagcaacttatcaattacggctcaggttttcttaccctggattggtccacatggagatttctgctctgGTTTTCTTAGTGTCTTTGCAAAGGCTTAGAATCGGACTGTAGCCAAGGCGGCTTGGTCCTGTCTGCATAGTCAAGCTTGTTTCTACCACTAGAGAGTCTCGGAGGCCAGAGCTGAGCCTCCAGCTGACGTGGgcttcctggggctgccatcacaaagcatcgcaagcctagtggc…
CUFF.29133.1	chr25:40261023-40261431	+	gatgctgggaaagactgagggtaggaggagaagggggcaacaggatggcgtgcttggatggcatcacagactcaatgcacatgagttgagcaagctccaggagatggtgaaggacagGAAGAGGAAGAGGCTATGAAGAATCTTCATCCCCCATTTGAACTGAAACCCCTCAAATATTCTTCTTCTATCTCCAGTCGGCAATACTGTAGAATAAATCCACACAGTCGCTTTTATGTTTTCTAATAAATATAGGTTCTCG
CUFF.29133.2	chr25:40261023-40261431	+	gatgctgggaaagactgagggtaggaggagaagggggcaacaggatggcgtgcttggatggcatcacagactcaatgcacatgagttgagcaagctccaggagatggtgaaggacaggtgagcctggcgtgctgcagtccatggggctgcaaagagtcaaactcagGAAGAGGAAGAGGCTATGAAGAATCTTCATCCCCCATTTGAACTGAAACCCCTCAAATATTCTTCTTCTATCTCCAGTCGGCAATACTGTAGAATAAATCCACACAGTCGCTTTTATGTTTTCTAATAAATATAGGTTCTCG
CUFF.29136.1	chr25:40389162-40408758	+	ggcacaggctgaccatcttctcagtctgctggctttctgaatgaagtcattattccttgccccaacaacttgtttctagattaccagcctgccatgtggtgagcggtatgagcttggactcggtgacacaAGAAGAGAATTCATGggccatttcaaacaggacaaaatgctgggatattagttgctgggtgtgggtctaagtttatctacttttgcctgctcaggagaggaagagtaaagCATTGCATTTTCCACTTGGAAATGCACAATTTCTTGCTTCTTGGATTTTGCCAGACGTTAAGGTTTTCAAGGGTTAAGATTATAATCAGTTATAATTTTTGCACCCATGTTTCTTTATTGGTTATATCGTGatcaggtgtttaactgtgcctttttaag…
CUFF.29225.1	chr26:1075896-1079701	+	tttgaactgtggtgttggagaagacccttgagagtctcttggaatgcaaggagatccaaccagtccatcctaaaggagatcagccctgggtgttcattggtgggactgatgttgaagctaagactccaatactttggccacctgatgcgaagagctgactcatttgaaaagaccctgatgctgggaaaaattgagagcagaaggagaaggggacagcagaggatgagatggctggatggcatcactgagtcaacggacatgagtttgggtgaactctgggagttggtgatggatagggaggcctggcgtgctgcggttcatggggtcataaagagtcggacacgactgagcacctgaactgaactgaAATTACTAGATGATTCTTAAGAGACTTCATGG…
CUFF.29230.1	chr26:3774386-3777216	+	aagagggaggagtcttttctctcttcattgccctttgaatcaagactgcaggtcgactctaccctgggtctccagtctcctggcctgccttgcagattttggctttatcagccctacaaaaggTCTCATTTTCCCACTTGTTTAGCTCATCTTTTCTCACATTCAAACAGATGAAGATAGCAACTGTGCAGTCAGGATTTTGCCTCAGATCAAAACATATTCCACAAAACATCCTTGGACG
CUFF.29275.3	chr26:8590584-8603256	-	TCCCTGACATTCGGTTAGTGAGCGCCCTGCAGTCTCTTCAGAATGGAGTCATCCCTGACATTCGGTTAGTGAGCGCCCTGCAGTCTCTTCAGAATGGAGTCATCCCTGACATTCGGTTAGTGAGCGCCCTGCAGTCTCTTCAGAATGGAGTCATCCCTGACATTCGGTTAGTGAGCGCCCTGCAGTCTCTTCAGAATGGAGTCATCCCTGACATTCGGTTAGTGAGTGCCCTGCAGTCTCTTCAGAATGGAGTCATCCCTGACATTCGATAAAGCTGGTAGGAACAGTCATGTATAAGctaatactttggccacaactcattggaaaagaccctgatgctgggaaagattgaaggcaaagggagaatggggccacagaggatgagaagattacagagca…
CUFF.29275.1	chr26:8590584-8604881	-	AGGGGAGCTGTAACGCAAGATTTAATCTAACAGAGTGGTTGCGTTAGTTTGGAGTAGATGAGCAGCAGCTGCTGGGTATTTTGCCTTTACAAGAGCCCAGTAATAAGCCCAGAGCTGATTCTTATTAGTTCTTATTAGTGAAAgatggaggcaggatggtcagagagatttgaagatgctttaccactggtttttaagatggaggaaaggccttgagccaaagaacgctggcagcttctagaagctggagaagataagcaaacacatttccctttggtttccggaagaaatacagtcttgccaacaccttgattttagctggtgagatccatcttgaacatctgattatactgATAAAGCTGGTAGGAACAGTCATGTATAAGctaatactttggccac…
CUFF.29275.2	chr26:8590584-8604881	-	AGGGGAGCTGTAACGCAAGATTTAATCTAACAGAGTGGTTGCGTTAGTTTGGAGTAGATGAGCAGCAGCTGCTGGGTATTTTGCCTTTACAAGAGCCCAGTAATAAGCCCAGAGCTGATTCTTATTAGTTCTTATTAGTGAAAgatggaggcaggatggtcagagagatttgaagatgctttaccactggtttttaagatggaggaaaggccttgagccaaagaacgctggcagcttctagaagctggagaagataagcaaacacatttccctttggtttccggaagaaatacagtcttgccaacaccttgattttagctgATAAAGCTGGTAGGAACAGTCATGTATAAGctaatactttggccacaactcattggaaaagaccctgatgctgggaaa…
CUFF.29284.2	chr26:8849312-9036283	-	caggtcgcctgcattgggagtatagagtcttagccactgggccaccggcgaagtccTAGCATTGTGAATTATAGTTTTATACTAAAGGGTGAGGACAGCATGAACATCCCTAAGTGTGCCTCTGGGCATATTCAGCCATTCGCTTTTGATTAGAGGAAAGAAGAGGGCCATCCACTTGAAAGGCAAAGCTGCAGTGACGAAAGGAGTGGTGTAATTTTTGAATTTCAAGAACAGTGAAGTAGGCGATGGCAGCGAGCGTATAAAAGGACACATTGGAAGACTGATAAAGAGAAATAAGATGATTCAGGTACACCATTAAGTTCTTTGGAATACACAAAAGTATCTGACTAGAAAGCTTATGAAATAGAAGACAAGATCCTGCCTCAGGAAGCGTACATG…
CUFF.29357.1	chr26:13248924-13252205	+	TGAGACATGGCAAGCAGAGACGGCGAGCAGCCAGGAAGAACCAGGCAAGCTCCAGTGAATGGGGTTCAGCAGTGAGGTCTGGAAGAGATGATGGAGAAGGCAAAAGGCCAAGAGTGAAACTCCATAGAGAAGCTGGGTGAAGAACACGTGATTCTCAAATTCAAATCTGTTGTCAGTAAAAGCTGGAGAGAAACACCTGGCTTCAAGCAAGCCAGTGCCTCAGCTTCACAGAGAACCTCCTGGAAGGGGGCCAAATGAGAACTGTCTGTGAGGGGTGACGAGGCTCCAGTCCATAAGAGAATGCAACACGCAGTGAGAGCCTAAAACCTCTGAAGAAGATACCTCGTCCTCCATTACTCTCTAAACTCTGTGTGCGAGACGCGGTGGGGCCTGGTGTCA…
CUFF.29407.1	chr26:14509931-14586215	+	gtgtggagaaaagatgcggtaattggccttcttagcagacataactaggctgcaggcctcgacgccttctgaggatggagttttccgttctttgatgttgaaagCTGTGACCTTCAACCAAACATTCACACGAGTCATGACCGTCAGAGTCTTCGGCCTCAAAGAACACACAGAAGGAACAAATGTAAAAGATATCTTTCTTCCTAATGCCGAGGCCGAGCTAAaaatgagaaaatggaagcccaaatacttgaagtaacttgctgaagataatatagctggtaagagatagagccaggattggaactcaggctgactgactccagatcccACTCCTCAAATCACAGGCATCCTTGCCTCCGGATTTCAGTAATTGCTTGGTGAAACGTCAACATCCTT…
CUFF.29457.2	chr26:17321117-17322829	+	GACTGCCGGGAGCGGGCGCGGTAGGGAAGCTGTTTGTGGAAGCTGTTTGTGGCCGGGAAAGGTTGGGGACTTGGTGACAACCTACTGCCTGTAATACAAGTCACgtgtctggcattgtgcttaacaccagcattgccataccacttaatggcttcttcaacaacagtcccaggagaaagaaatattaccgtttccattttatatacgaggaggctaaggctaagagaggggaagtgatttaagatcatagaactagtattcagtgaagctggtctaactccatcagtttggctgcaggacctgtgttTGAAATCTCTCGTGCTTCCATTTTAAAAAGTTCAAACCCCGGGTGCTTGTTATCCTGTGATCTCTAAAGCAGTGGCACAACAGGAAAGATGG…
CUFF.29457.1	chr26:17321117-17335573	+	GACTGCCGGGAGCGGGCGCGGTAGGGAAGCTGTTTGTGGAAGCTGTTTGTGGCCGGGAAAGGTTGGGGACTTGGTGACAACCTACTGCCTGTAATACAAGTCACgtgtctggcattgtgcttaacaccagcattgccataccacttaatggcttcttcaacaacagtcccaggagaaagaaatattaccgtttccattttatatacgaggaggctaaggctaagagaggggaagtgatttaagatcatagaactagtattcagtgaagctggtctaactccatcagtttggctgcaggacctgtgttTGAAATCTCTCGTGCTTCCATTTTAAAAAGTTCAAACCCCGGGTGCTTGTTATCCTGTGATCTCTAAAGCAGTGGCACAACAGGAAAGATGG…
CUFF.29515.1	chr26:18850971-18858180	-	GGCCCCTAGgttgggaagacaaaggattctaagagtggccagtgaagtagaaggagacctgaaggagagtggtatcctggaaccaagtaagaaacctggtaacagagtcttacctgctgcattgagtgctgctcgcatatggaataccattagaataacatgaagactgagaaataaccattggacctggcggcaagaagGAAGTGGAGTGGGAGGCAAGTTTCCGTAAGAATTCACAGCTACCCCAAGAGAAACTGCCGATACTGGGATTCTTAGCTGCAGTGCATTCCTGTCTTGATGACAGCCACCAAGCTGGAAGCCCGGCAGAATTCCCAAAGAACCCCTGTTCTGAGAATGGTTCCAAAGGCCCTCTGCAGGAGCAATTATCAAAGGACTGAC…
CUFF.29515.2	chr26:18850971-18858180	-	GGCCCCTAGgttgggaagacaaaggattctaagagtggccagtgaagtagaaggagacctgaaggagagtggtatcctggaaccaagtaagaaacctggtaacagagtcttacctgctgcattgagtgctgctcgcatatggaataccattagaataacatgaagactgagaaataaccattggacctggcggcaagaaggtcactgGAAGTGGAGTGGGAGGCAAGTTTCCGTAAGAATTCACAGCTACCCCAAGAGAAACTGCCGATACTGGGATTCTTAGCTGCAGTGCATTCCTGTCTTGATGACAGCCACCAAGCTGGAAGCCCGGCAGAATTCCCAAAGAACCCCTGTTCTGAGAATGGTTCCAAAGGCCCTCTGCAGGAGCAATTATCAAAG…
CUFF.29588.1	chr26:21753276-21758477	-	GGGGAACTTGAAATTGCGGGGCTAACTATTGGAGCCACCTAAGGACATGTCTCTGGTTCTGGTTTACAAAGTACCTTAGGGCGGAGATCGATGTCCTGGTTACAGAGGCAGCCAAGGAAGAAGGCCATAAGCGACTCCAGCCTACATTATACTTCCGGCCCCCAGAAAAAGCATTAGTACATCAAATTGctctgatactttggccacctgatgcaaagagctgactcatcagaaaaggccctggtgctgggaaagattgaaggcaggaggagaaggggatgacaggacgagatggtcagatagcatcacagactcaatggacatgagtttgagcaagctccgggaaatggtgaaggacagggaagcctggtgtgctgaggtccgtggggtcacaaacag…
CUFF.29696.1	chr26:25387698-25437297	+	CTGGGACCAGTAAGCTCTTGGAAGCAGCTCCAGTTCAGGGAGCCTTGTGGTTAGAACTGACCCTGTCTCCAGAGGCCGCACCAAAGGTCAAGGGTTTGAGGAAAGATAGTGCCTTCCAGCCACGTTTTTTTGCTTAAAATGGATCCATCCTCAACAAAATGAGgtactggatgaggtgctggtgacgcagtaataaggaaggtcagcgtctctggcctcacaaacatactggctagtggagcagaagtcaatggaagagcaaataaaggcattttacacattgtgataaattctgggagTGCAGCAAGTGGAGATATTATGACACAatatggccgtcccagtacagagcatggtgaactgatcaatgtctcgtttccagaaaatataattctctgaatg…
CUFF.29696.2	chr26:25387701-25437297	+	GGACCAGTAAGCTCTTGGAAGCAGCTCCAGTTCAGGGAGCCTTGTGGTTAGAACTGACCCTGTCTCCAGAGGCCGCACCAAAGGTCAAGGGTTTGAGGAAAGATAGTGCCTTCCAGCCACGTTTTTTTGCTTAAAATGGATCCATCCTCAACAAAATGAGGATTCAACCTAGATGTTGGCCTGCTGCTGCTGCTGGGTCTGGgtactggatgaggtgctggtgacgcagtaataaggaaggtcagcgtctctggcctcacaaacatactggctagtggagcagaagtcaatggaagagcaaataaaggcattttacacattgtgataaattctgggagTGCAGCAAGTGGAGATATTATGACACAatatggccgtcccagtacagagcatggtgaactg…
CUFF.29715.1	chr26:26404899-26484992	+	TCAGATCTTGGTAGGCTATTTAACAACGGGCGGGCTTCATACCTTCTCTTCAAATGCATCCCTTTGAAAGAGGCAGCCATCACATCCATGGGTGCTAACAGGTCTCCAAACCCGTGTCTCCTTACATTCTTgaatggaattactagatcatatggaagtgctattcttagtttttgagaatcctccacattgccttccacagtgtccataccaatcagcattcccaccaa
CUFF.29790.1	chr26:31162812-31166208	+	CTGATGCCCTGTCTTGTTTTGCTTCGTTTTTCTTCGCATTGCTCTCGGATCTCTGTTTTATGATCAAAGGAAAACATGATGGCTTGCTTCACTGAcagATTCACCGTGAAAAGAAAACTGTAAAACTGACACTGGGAAAGTGATTCTCTGAACTTAGAGGTCAACTTGAACCAGGAAAGATGGAACCCGTGGAAAGATTTGGCTCACCGCGCTGAACAGGTGCGGCCATCAAAGTGAGTGGGTGACGCTTGTCCGAGTCCTGCGGAGTGAGCCAGTGCTGTGTGACTCACCTTCGTGATATCAGTAAAGCTCCAAGCCTCTTGCCTGGGAATTGACAAAGGAAACTCTATTCTGAATATGTCACTATTTGAATCTTTAAATGTAATCCACTTACCAGTC…
CUFF.29790.2	chr26:31162815-31166208	+	ATGCCCTGTCTTGTTTTGCTTCGTTTTTCTTCGCATTGCTCTCGGATCTCTGTTTTATGATCAAAGGAAAACATGATGGCTTGCTTCACTGAcagTCATTTCCAGCTCATCAGCATTATTGATTTCAGATTCACCGTGAAAAGAAAACTGTAAAACTGACACTGGGAAAGTGATTCTCTGAACTTAGAGGTCAACTTGAACCAGGAAAGATGGAACCCGTGGAAAGATTTGGCTCACCGCGCTGAACAGGTGCGGCCATCAAAGTGAGTGGGTGACGCTTGTCCGAGTCCTGCGGAGTGAGCCAGTGCTGTGTGACTCACCTTCGTGATATCAGTAAAGCTCCAAGCCTCTTGCCTGGGAATTGACAAAGGAAACTCTATTCTGAATATGTCACTATTT…
CUFF.29795.1	chr26:31432516-31434771	-	GCCCAGGAGTCAAGCTGTGACAGAAGAAAAGAACTTGGGGAAAAGCACAGGTTCAACTCAGATGAGAGTTCTGCCCTGGTTCCTGCTTCAGATTCAATCTGTTGGTGCAAGAATAGATTGTGGAGATCTCAGAAAAGGGGCCCGACTTCCTGAGACTGGAGAATCTTTTCAGTCTTGAAGAGCAAATAAAACTGTTACCCCCATACCCTGCCTTTGCAGTAGTAAAATCTTGGTGATCTAGAACTATTCTTAGTTCCCTCAACTTCCAAGTCCTCCTCTACCTCAAATGTCTCATGTTACTGCTTTAAAAACCCTCTTATACCTACAAA
CUFF.29801.1	chr26:31683153-31685083	+	AGGGCAGAACAGATGTGAATGGAGACCATTGAAGgaattgagttaatatacaacacaggccatgtgcgaccagattaagccaacggaaacttttgaagtgaggattgaggaaaCCTGCAGGCGGcaagtaggttggtcttgcattaaccattgagtctacagggcaggaagcgtgtcctagtcccctgcgtctgcacagaacaggcaccagtgactgttGAAGGACGAAGCAGCCCCCTCCCCATCCCTGTGGCTGCAGCCACAGAGGCCCAAGCT
CUFF.29815.1	chr26:31934437-31935894	+	GCTTCCCGTGCTTGGAGATGGGTATCTTAGCCATCTGGGCATTGGCAGGAGGAGTGGGAGATGGCGAGGAGAGAGCAGAACACAGCAACCTGCCTTTTGTGCGCCTGCTTTTAAGCCCCTTTTCTATGGGACCAGCTTCTGTTTGCCTCTCTCTTCCTAATTTCATCTGTTCAACTTACTAGAGGTGCAGCCTACACCTTGAGCTCCAGTCAGACGTGGTGATGGGCAAGCATCGGCATGGAGGACACAACCGTGGACCACACGACCGGCTGTTTCTGTGCTTGGATGTGACCTCCAGTGACATGCAGGGTGAGCGCAAGACCTGCCTGGAGCCTGGCCACGAGCTTCACGGCCTCCTGCCCCATCAGTGCCTTTGTACCTAAAGAGAAGCTCCCTGAC…
CUFF.29835.1	chr26:32708014-32715561	-	ctgaggcaggagaaggggacaacagaggatggggtggttggatgtcatcaccaacttgatggagatgagtttgagcaaactctgggagctggtgatgacatccacaacagggaggtctggcatgctgcagtccatggggtcatgaagagttggacctgactgagtgactgaactgattctgaaccatgaaggaaatgtctatctttgaataaagacaacatcaaagaaaacagggcacagaaagacagagaccagcctcgataacattattcaagcccctagatgcagccattcctgaagcagaaatgcttcaggaacctttcatttatGACTTCGGCTGTTAAAACGTCTTCATACTGGAAGCTTCTTATGCATGAGAAAAACTTAGTAAGAGCATTA…
CUFF.29865.1	chr26:33745152-33747356	-	GTAGGGGCTTGGAATGTCACACTTTGAAAAGTGTTGTCAAAACAGTCAGGGGTGAAGCTGGGGGGTGGGAGGACAGCGGGGAAGGACCACCATTAACCCTTCACACTCCAAGGTCTAAATCTTTTGTATTAGAAAGGATTATGTTGTTTGAGCGAGGAGAAAACATCCATTTTTCACCAGGCAGAAAGAGAAGTTGCTGCCCAGCTAAATAAAACCCCAATGAATAGGCCCCTCTTGGTGTCCTTTAAATGCTGGATTCCAAGTTCTAAAATGAATTCAAGATGCTGCTTATTTATTTGTTCAACCTAGTAGCAAACAGTTTCAGCTGAAAAGCAAATAACTTTGGATCAAAGAAGATGCAAAAGCTCTAATAACCAAGTCCTTAATAAGAATTTCAAA…
CUFF.29858.1	chr26:33958787-33959517	+	GAGGGGCATTCAGAAGCAAAGCGAGGAACAGATGTGTGAGCCCTGAGGTCTCCAGTCTTCCTGTTTCCCATCTTGCTGGGCTCCTATCTCAGCTGGTCTGTTTTCAGCTTCATGAAGAAGATTCCTCATCACTGCCCAGCCCCAAGTTCTCCGTTAGGGTTGGAGCTTCGGATGAGATGTGTGTGTGTGTTTGGTACTTGAAATACAGAGAAAGAGAGATTGTTCACCCCTCTACACACCTGACATAGAGGTCTTTGTGAAGGAAAGACAGCTCCAGAAACTTGCGACTTTCGGCTTGAAAACTTAGCTTGCAAGCCTTAGTTCATTGGGTATTCTGCCAGTAATAATAATAATAACCACAGCTA
CUFF.29972.1	chr26:38410440-38412294	+	ATGAGGGCAGGGCTCCCAAGGGTGAAGCAGACAGAGCTTTCCAGAACTTGTAAAGATGACAAAGGCTGGCTTTACACGAAACTGAGGTGGCCTCTCCTGGGTGCTTCCTTCTGTGGCAGTGCCTGCACCGTGTATGCCTGTGTTCCCCCCATGCCCCTCCACAGAGCCTGCTCTTCAGAAATAATCTCAGGCCAGTGGCTCAAATTAAAAGAAAGGAAGGAAGGAAAAGAAGCGAAGTTTCTTAGATGGCGAACCTGTGAGGGACAGATAGGCAGGATATGATCTCTGCCCCAGGATGCTCACAGCCTCCTTAATCTGTCCCCATGGAAACATCTGCAAGACCCCAGAGAACCCTGTGGACCCTTTCTCTAGACTGCTACATTCTAGAAGAGTTGAAGA…
CUFF.29992.1	chr26:39527482-39535797	-	ttgagtaagtaaacgcttttcctgagttctgtgaactactgaagcacatGTGCGCTGCGACGcttcagtcgtgtccgactctgcgacctcatggactgtggtccatcagactccccgtccacggggttctccagtctcctgagatctgagttggggaagaagacggtgagggagagggggtctcgatatctgacagGAAGCTGGAGCTTGAGGAGAATTATGTCCCTGCCTTGGGGCTGGTTGTTGACCGAAGCCAGGACAGAAGGAGCAGCCCCTTGCTGGGATCTCCCATTCGATGAGACCAACCAGAAATGGAGATGCTGGACTAGGTGGAGAGGCTGAAGAAAGTAACCAAGCAGTGGGGCTTCTGTGGATGCAGCCTGCATTTCCCCCTGAGCA…
CUFF.29992.2	chr26:39527482-39535797	-	ttgagtaagtaaacgcttttcctgagttctgtgaactactgaagcacatGTGCGCTGCGACGcttcagtcgtgtccgactctgcgacctcatggactgtggtccatcagactccccgtccacggggttctccagtctcctgagatctgagttggggaagaagacggtgagggagagggggtctcgatatctgacagGAAGCAGGAAGCTGGAGCTTGAGGAGAATTATGTCCCTGCCTTGGGGCTGGTTGTTGACCGAAGCCAGGACAGAAGGAGCAGCCCCTTGCTGGGATCTCCCATTCGATGAGACCAACCAGAAATGGAGATGCTGGACTAGGTGGAGAGGCTGAAGAAAGTAACCAAGCAGTGGGGCTTCTGTGGATGCAGCCTGCATTTCCCC…
CUFF.30110.1	chr26:45459178-45490118	-	AGTCATACAAGGGAGAGGTGGGGAAAGCCATGTGTCTTGCTGATGCCAGACAAGAGGCTGGAATCACATTTGCAGtgcatctggttcacaaattggaagaggaacaggaaaatggactctcagcctcacaaagaatgcttcattataccagaacctcctgtgtttgtcctgtccaggagaaagcatttgacaagCAACTCAAGAAGAAAACCTGACCATCGAGCCCGAGGTGGCAGGAAGAACTCCAATCACACAGAATGTTGCTAGCCAGCCTATGGACTGCATACCCCCAAATCTGGTGTTGTGATGTCCACTCAAAATGGCTTAAATGAACATTTTTTTGATGTATATATAATAATCTTGAATTTTaatatacaaaaacccatttaattatatcct…
CUFF.30231.1	chr27:1461840-1462766	+	tagtcgctatgttgtgtctgcctctttgcgaccccatgggctgtagcccatcaggctcctctgtccatgagattttccaggcaagaatactggagtgggttgccatttccttctccaggggatcttcctgaccaagggattgaactagagtctcctgcactggcaggcagagaattctttactgctgagccacctaagaagtccAAATTTTCCTCTACGATACTGAAAACCCAGCTCCTTTCCCTCCTTACTTTCACCTTTGTATTGAAATGTTCCCAGTTGGAGGGTCATCATTAACAGAGAAAAGCTGAAAAACGTGGAGCTATATTTGCTGCCAGGTTAAGAAATATATCTAAAAGAAAATGCATTTGAGTTGAATCATAAAGAACCTTCTGTGAT…
CUFF.30234.1	chr27:1537744-1538794	-	GGAGGGGGCAGGAGAAGGAAGAAAGGGTCTTCCCAAATGGGCCCTTGAAATCTTCAGGAACGTTGCACTATGTATGTTGAAAGAATTTTCTTTGTGAAAATCTACACAGGGAACTTCCCACCAAGATTAGTAAATGGCCAGCGTTCAtttcctattactgtctaaaacattggcatagacttggcacttacaatacaccctccatcacctcagcttctgtagatcagaagtctggcttagggagactgggctctctgcccagggtctctcaaagtctgaaattgagatgatggccaagctgcactttcacctggagcttcctgctctcttcagaactcaccgaggttgttagaaaaatcaagatccttgtggttgtaggactgaagtcctcattttatt…
CUFF.30235.1	chr27:2624230-2667771	-	ACTTACAGAGAGTGACTCGGTGAAGGACTCGCAAGTCTGAGCATCCGTGTTCCTGCCTCTGAGCCATGCGTGCTGCTCTACTGCCATGGCCTGGCCTGCAGACAGCATCCTGGTGCTGAGATCATGACGCTTCTCTTCAGCTGTCCTCCCAGGATCCCTGGCCACCAAAAGGGTCTTATTCTCACAGGAGCCCCAGGAATTCTCCAGAGGCAGCTGTAGCTGAACTGATTACCTGGCCCCAACTAAGAACATAGGCTGAATAAACTGAATCCCCTTTCCTACTGAATTCCTTGTAAAACTACGGAGTTAGTTCCTAAATATGCTCACTCCTAAAATATGTCTTAATGAAATATTGAGTTTTTATTTTTTTATTTAatttttattattattattattatt…
CUFF.30242.1	chr27:3897208-3969859	-	CATATAACTTGCAGCTCATAAAGGTGAACTGTAGTGACAGCTGACTCAGAGAGTGACTTCCAGGTCTTCTGTCTTGGCTCTGGTGGTCAGAACCAGGCATTAAAAAGAGTTCCACACGCAGATTCAGAATAAAAGTTGGGGGAGAAGTACAGAGAAGTCCTAAGTGAGTCCGAAGGTTTGTTCAGATGTGGAAGGGATCGCTGCGGGATACTGAGATGAGTCTTTGGGGATTCCAGCAAGCTAAACTATGTCAGAAATTGGAAGGAAGCCAATCTTCTTTCAGAACCAGGAAAACCAGTTCATCCCAGGAGCCCAGCCTGTAGCAGAGgcggaggagccaagatggcagaggagtaggatggggagaacactttctcccctacaaattcatcaaaagag…
CUFF.30286.1	chr27:6802476-6820012	-	GAATGAGATCAcagtaaaaaacaagagactggacaaagacttggcttgtcatcatggctccattatttaccaggtatgcaaactttggtgccttaaaacctctccctgcttcactttcctcctctgaaatgtgaaGAtggagtacccgcacctgtgcagatgaggcctctcgggtgggagacaaagctgaggatggagaaagaaacacctggtcgtgagccagaggtcagctagagctgctgccattggtctccaccccagaacttgcagcggcccaagacgtttcattcagacctgcacgtccaagctataatgaagTTCCTCTCAGGTTCCAGCAACAACTAAGCCAGCCTCATCTTCAAAGGATGGTGGGAGACTTCCTGCAACAGataaagaaac…
CUFF.30287.1	chr27:6819423-6832103	+	agagtactggagtggggtgccactgtcttctccGAAAGCATCACTGCTGTCTCTCGTTCTTACGAAGCAACGTGGTTGTTTTAAGAAGAAGAGAGAAACGATTCTAGCTTTAGCTGTGGGAACGTTCCTGCTTGCTggcctgactcgaccattggctggtctggggtaaaagtacaaagCTGCCAGGAGCTGTCCACAGGATTCCATGTGTATGAATATGCCATCGACACGGCAGAAGAGGAAAGCCGCGGAGTGGTACCAGCTCCCACAGCAGCATTCTCTGTGAGTTCTCCCGTGGTGAGTGCGGCAGCCAAAGGATTCCACAGCTTCATCCCACTCTTACTCTCAGACTCCACTCTGCAGCCTCGGCACTGCCCTCCGCATCACAGAAGAGAAATG…
CUFF.30291.1	chr27:8271911-8424773	-	AAGAGGGAGGGGGCGGCTCAGAGCCTTGGGCGGAAGCAAGATGGTGCGTGACGGGAAGACAGGGGTGGCAGGTGGAGAGAAGGAGTTCCTGTGCAGAGCCCCCCGGAAGAACCAGCGCTGCCCAGCACCCTGATTTCCCACGTCTGAAGAAGGATCTTGTTGGCTGAGAGGTGAGAACAACCTAGCCTTGCTGGCAGGAATCCAGTCCACAGAGGTCTTGACGCTGACCTTCACCCTGGAACTCCATCCATTTCTGGAAGAGCTGCTCTTTCAGTCGGACTCCAGTGTCCTCTTCATCCCCTGAGTAGCTTTTCAAAAATTTCTCAACTTTAATTCTTATCACACTCTGTGTTAATGAGCCTTGAATGGAATACT
CUFF.30297.1	chr27:10830882-10978973	+	CTCTTGCGGGAGACATAGATTCTTGCTGCAAGGAAATAACAtaaagaactttgaacacagattcagtacaggacaaccggaagaattctgaccaggtgaagacacgggaagaagatggccacctacaagccaaggaaagaggtctcagaagaaaccaaacctgcctccaccttgatctagCCACTCTCACCTGCAGTACCCGCTC
CUFF.30365.1	chr27:14066251-14067049	-	ATGGTGGGGGCAGGGACTAGTTTTAGTAAGAAGTGCCAAAGGCTGAAACCACAGTAGCTTTGGAAGAATCCTCATCAGTGCTGGTGGCAGGGACCAGGGCCAGAGCCcaaggatgtgaagtactcagattctcgtgcacaactgctgataatgcaaactcgagcagccacttgtgaaatcagtttagcactttcataatgttaaatacactcttactatatgagccgctcattcaaccgctaggtgtctattcaagagaaacagaaattcatgtccaccaaaaggcttgtacgtcagtgttcacagcgcctttattcctaagggcctaaaatggaaatgacacaaatatccatcaagaggtgaacggatacagagattgaggaatactcttcaccaata…
CUFF.30425.1	chr27:15710419-15718815	+	AAGGACGTTACATTTACTGTGGACTTTGCTTCTAATCCAATGCTGCTGCTAATCTGACAGGAGGTATTGATCTGTGGCCCAGAGATTGGCGACACCTGCTCCAGAGCATACGTGGACAGGTGAATTCTTTACCCAATTGTCTGCAGCCAGCCTGGAGGAGGGGGTGAGGGGGCGGAGTAACCCCCTCAGTGCAGCTGCACTTCTTATGCTCCGGATTGCAGTGGGAGACACGGCATCTCTGCACATGGTGTGGTGTCTGCTGGGCATGTGGACGCCAACTCCATCTCGACTCCAGGAGCCACTCACCAACGCCACCTTGAATGGAGGATCCATTCTCAGAGCAAGTACATGGCCACTCCctgaggtactggcgccgctgtttcacaccaggaatgctca…
CUFF.30429.1	chr27:15822748-15824157	-	TGTGTTTGAGGTCTCCTTTCCCTATGGCGTAGTTCCTCTTGCTTTTGGTCTCTGCTCCCCGGTTGGGTGAGGTTGATCCAGTGGCTTCTGTAGGCTTCATGCTGGGAGGGACTTGTGCCTGCGTTCTGGTGAGGGGAGAGGAGTTTCTCCCCTCTGACGGGCAGGGCCATGTAAGGCGGTTTTTTGGGGGGTGTCCACGAGAAGCCTGTCTGCTGATGACTGGAGAACATGTCTGATTGCAAGCTCCTTGAAGCAAGCTCCTTGTCTCTCTTTCTGCAACGTCCTGTTCACTGTCATGAACGCAAATAGGAATGCGGTATGAATTTCTTGGGTTGAACTGAATTTTGTTTCTAAAGGGAAGTTGGCTGTGTCCCAGAGATGCCTTCCTGCAATTGACTC…
CUFF.30430.1	chr27:15823404-15859465	+	GAAATGCGTCTGCTTCTGTGTGTTTGATACCGCTGCAGGGTGAACCAGACCAATGTCAGCCCAGAAAAATTGGAACGGCCTGAGCATATCTGGAAACAGATACTCCACAGATGGAGAGAGAAGTGGGAGGTTAACTCAGACCACTTGATTTTAATTAAATAGCCTTCTGCAGGGGGAAACAAGATGGCGGAGGAGTAGGTGGAAGTGGAGTACATCCCTCTCTACAGACACAACAGGAGTACATCTTCAGGGGCAGAGGGTCTTCCAGAGCCCCAGCTGAGAGCTTGCAGGAGTCTGACCACCCGAAAGGAAATACTTGGATGCACGCAAAACTTGAGTCTGGCCTGAGCCTCTGGGGTGGGAGTGCTAAGTCCAGGACGCTAGACCGCCAGAGAGCTC…
CUFF.30438.1	chr27:15888760-15933449	+	gggatggaacccttacatctcctgctttggtagatgagttctttacctctagcgccacctgggaaacccAACTTGGTACATAGGAGGACCCCAATTAGTCAACGTTGAAGCCAAGAGGAGGAAAAGCCGCCCCTGACGTAGAAGCGAGCCTGTACTATGAACAAATGATAGGCCACAATGAAAAACTCCCTTCCTTCGCGAGAGCCCCAGGGACAGCTCCATTTCCTATTCAGCGTCACACCTTCGCAGATGGATGAGCCCTGCACTGCTGCCTAAAGtctgccatgtgagctgacctgtgatcaaggcacttcagcaagga
CUFF.30476.1	chr27:17736201-17784629	-	GCAGTCGGCTGTGTCGGCTGAAGCAGAGGTTGCCTGCGAGATTTCTGAGTCAGTTATGCTTCGAATCAACATTTGGCCAACGTTGAAATGCCAGGAGGGAGTGCAGCTGTGAACGAGACCGGTTTCGCTGGTGCATCCGGCAGACCCATAAGCTGTGTTTTTATGACAGGGCCTGGCTTTAATTTTCTTGATTTGACAAAATCTGACTATCTCTGGCAGAGCCATCTGTCCATTTGACACATTTTGGCCTCAGCAGAAGAGGAGGAGCAGGTCATGCAGCGAGGGACTCGACAGTTTGAGCATCGAGTAAAGGAGAGACCTTCCACCAACATGTGTGGCGGTCTGGGGAAAAGGATTTCAAGGGCCTTTTTTATGCTGGATCAGAGAACATACTTGGTG…
CUFF.30477.1	chr27:17783541-17788124	+	tgaggtgcgacagcaaaactagcacaaatttcttgttctttgcaatttcaagaataaaagatctgttcttaccgtaggtcttagcaacctcctcgtaggatttctttccttcttaagtcaccttttcccttagaggaagcacttcatgacttctctttggcataccccaattgccaaatcattactctagagttttggcgccgttattaagtaagggtcatttgaacataaacgctgctgatatgaagactgcgggcctgactaccaagttgactgCTGCACTCCCTCCTGGCATTTCAACGTTGGCCAAATGTTGATTCGAAGCATAACTGACTCAGAAATCTCGCAGGCAACCTCTGCTTCAGCCGACACAGCCGACTGCTTTTGGGGATCTAGGTA…
CUFF.30477.2	chr27:17783917-17788124	+	gaaggtgcacacgtgtgaattgttcttttctgatggaatagaccagggttgactgtgggtaactgaaactgtgaaTGAAGTGGTGCTAATGGAAAACAAGTGAAGATCCCTGTACAAAGAATGACAAAACTCTCTTAAGGCCACTTGGTTTCTCAGATTCTCAAAGGGAAGAAATAATGGATATTATTTAATAACAGAATTTCTAGGCTTAGGGCTGTGCGTTTGTGAGGAGCCCCAATTCATATTTCCATGGACCAAAAGGGCCCCTTTCCCACCAACGTGTGAAGCAATGGGAGGTGAGACCTCACCTTAAACACCAAGTATGTTCTCTGATCCAGCATAAAAAAGGCCCTTGAAATCCTTTTCCCCAGACCGCCACACATGTTGGTGGAAGGTCTC…
CUFF.30527.1	chr27:20062584-20146590	+	AAAGGGATAAGCTGAGAGCTAAGTGTAAAAAGAAAGGGAGCCCAGAAGGGAGGGGGCTGGGTGGATGGATGGGTGGGTAGAAGGAAGAGAAGAAGGAAAGAAGAGAGACCTCAGGAAGCAAGTCTGCTCATCACGGCTTCATTATACACCGAACCTTCTGAGTTAGAAGaaataattgtggagcacatactatctgtgccaagcgctggacagagaaccaaggacccctccgagtcctcatggagcttttattctgTTTGTAACATCCTGAAACTAAAGTGCTTGCTGACTGCCAACCACTTTT
CUFF.30527.2	chr27:20062584-20146590	+	AAAGGGATAAGCTGAGAGCTAAGTGTAAAAAGAAAGGGAGCCCAGAAGGGAGGGGGCTGGGTGGATGGATGGGTGGGTAGAAGGAAGAGAAGAAGGAAAGAAGAGAGACCTCAGGAAGCAAGTCTGCTCATCACGGCTTCATTATACACCGAACCTTCTGAGTTAGAAGaaataattgtggagcacatactatctgtgccaagcgctggacagagaaccaaggacccctccgagtcctcatggagcttttattctggaaaaagagtctggagcataccatcaagactgtgaagtttccagagtccccaggactcaagatccttccatctttctgtctcacctgctagcctgtgacttccatcctcagggtcaatttacaatccacgttggccaccaaat…
CUFF.30527.3	chr27:20062584-20146590	+	AAAGGGATAAGCTGAGAGCTAAGTGTAAAAAGAAAGGGAGCCCAGAAGGGAGGGGGCTGGGTGGATGGATGGGTGGGTAGAAGGAAGAGAAGAAGGAAAGAAGAGAGACCTCAGGAAGCAAGTCTGCTCATCACGGCTTCATTATACACCGAACCTTCTGAGTTAGAAGgaaaaagagtctggagcataccatcaagactgtgaagtttccagagtccccaggactcaagatccttccatctttctgtctcacctgctagcctgtgacttccatcctcagggtcaatttacaatccacgttggccaccaaatttctgccattttgccctcagtccaggaagcagTTTGTAACATCCTGAAACTAAAGTGCTTGCTGACTGCCAACCACTTTT
CUFF.30530.1	chr27:20236596-20242647	+	ATTTCTGACTTGGTTACAAAGAATCCTCTTTCCTAAGATTATGTCCTGCTTTCTCAGCAGTTCAAGGATGTCAGGGCCAATATCTCCACCGTTCATTTGGTATTGcctaatggtcaaggtgtggctgtcccagcttccgccatcacttctgcattcaaagctggaagaaggaggatggACTTTCTAAGTTGTCCATTTACAAAAACCGAGATAGTTTGGGTACTTTCAAAGGGCACAAAATCTTTCTCAGAACTTGCATTCTCCAACAGAGTTTCACTTATATTTATTGGCAAAAATTAGATCATATTGCCAGCCCTGACTGAGGAAGGCTTGAAAAGTAGGGAAAAGTCTATGGGAGACACTTTGGTATTGGCCTTGCTCTTCAGAGATGCTGTAATC…
CUFF.30597.1	chr27:23981197-23989025	-	CTTTCCCTTATGCCATCATTTTTACTGTACCCAATCTGTGACTTTAGGAGCACCAGTTTTTAAGGGAAGAACGCTGGGGAAAAGCACAGAAACCAGTGACTTCTACGGCTGTGGGATTTCCATGGAGAAAATAGCATCAGAATGCACCTGGACCATCTTCTGTACCTGGCAAACCCTCACACTCCCAGGCGTGTTCTGTGAATTCGCGTGCATGTGTGTTCAGGGTGTTTTCGTGCGAGGGAGCACACCTAGCCTGTAGATGAGGCAGGGAGGGTGCAGGGGGGGAGAAGGACGGGAGAGACTATGGAGCAAATGTTTGACAACCTGAACCTCAGAACTGTGATCCTCCAAGGAGAGCGCTACTTGAAGAAAAGAAAAAATAATAAAGTCGAATGGCTT…
CUFF.30599.1	chr27:24107520-24112212	+	GGCACGGGAGACCACATGTGAAGAGGAGGAGTCTTGAGCTGGGCCTTAAAAGATATGGTCAAGTGGGAACACATATGCTCCCTACTGAGGAAAATAAACTGCAATGTATTTTTAGCATCCGTTGGAAGTACTTTCAGCTGAAGATCGTCTGCAGGATCTAGGCAATTTCACTGAGAGTCAAAGGATTTGCAGCAATGTTACCTAGAATTCCAGAACTTGCCCCAGGGGTCTGTAAATAGCATTCTCCCCGAACCCATCACACCACCCCCAATCCTGGTGCAAACATCCTCTTTATGAGAAAATGGAGGAAAATCATTCCAGTGAAGGATAAATGAAAAACATGTTAAGTAGTTACGACAAATGAAACTAACCATAGCTCACT
CUFF.30608.1	chr27:24626979-24632546	-	TGCAAGTGTCTTAAAGGAAGGTCTATTAAGCTTGAAAACTGGAAGAGAAGATTGAAATCTTCCCTTCTGGATGTAGTCATGATGTAGAGGAGGTGCAGATTCTGCAAAGGAAGGCTCCTCAGTGTGGAAGTTTGCATAATTCTCCCTCCAAAGATTCTGCCCACATATTGAGAAACCACAGAGCCTGTTGAAAAACCACAGAGCCTGAGAAACCATAGCCACCTCAA
CUFF.30668.1	chr27:26712340-26714932	-	GTGGAGGTGGAGAAGCTGCTCAGCGGgcttaagtcagcccgacatattccaagagagtggccagaagcatgcaaggtgtcttgaggctcagaactgacacctcaccactgcttccattacaaggagagctccaattccaggggttcatgctgaatatgaagagctgaaaactcacattgccaaggggcagagatccagagagggtaaaattgaggctgtttctacaatcCTCTGCAGATAGTGAGCCTCCTTTGAGGTCCACCTGCCCCTGTAGCCTTCTTCCATAGACACCAGACACTCGAAAAAACCCTGCATTTGCAGCCTCCTCATATTTGATGTTATTTTATTGAGCCCAAGtatttccatgttactcccatctcttcaactcctaagcttgtt…
[truncated: 557 more rows]
