# Supplementary material for: Systematic identification of long intergenic non-coding RNAs expressed in bovine oocytes
Source: Reprod Biol Endocrinol. 2020 Feb 21;18:13. doi: 10.1186/s12958-020-00573-4 (PMC7035783; doi:10.1186/s12958-020-00573-4)
Supplement: Supplementary file 2 — Additional file 2: Table S2. Comparison of bovine oocyte lincRNAs with previously identified lncRNAs in NONCODEv4 database. [file 12958_2020_573_MOESM2_ESM.xlsx]

## Sheet: Sheet1
Additional file 2: Table S2. Comparison of bovine oocyte lincRNAs with previously identified lncRNAs in NONCODEv4 database
LincRNA (current study)						Bovine lncRNA (NONCODEv4)
Locus	Transcript	Chromosome	Start position	End position	Strand	Locus	Chromosome	Start position	End position	Strand
CUFF.1553	CUFF.1553.1	chr1	116394644	116429422	-	NONBTAG000929	chr1	116414531	116414962	-
CUFF.1553	CUFF.1553.1	chr1	116394644	116429422	-	NONBTAT001288	chr1	116414530	116414962	-
CUFF.1617	CUFF.1617.1	chr1	118991705	119073289	+	NONBTAG000952	chr1	119061740	119073222	+
CUFF.1617	CUFF.1617.1	chr1	118991705	119073289	+	NONBTAT001316	chr1	119061739	119073222	+
CUFF.15398	CUFF.15398.2	chr17	71963314	71972732	+	NONBTAG006100	chr17	71963874	71964468	+
CUFF.15398	CUFF.15398.2	chr17	71963314	71972732	+	NONBTAG006101	chr17	71964469	71964786	+
CUFF.15398	CUFF.15398.2	chr17	71963314	71972732	+	NONBTAT008893	chr17	71963873	71964468	+
CUFF.15398	CUFF.15398.2	chr17	71963314	71972732	+	NONBTAT008894	chr17	71964468	71964786	+
CUFF.15398	CUFF.15398.3	chr17	71963314	71972732	+	NONBTAG006100	chr17	71963874	71964468	+
CUFF.15398	CUFF.15398.3	chr17	71963314	71972732	+	NONBTAG006101	chr17	71964469	71964786	+
CUFF.15398	CUFF.15398.3	chr17	71963314	71972732	+	NONBTAT008893	chr17	71963873	71964468	+
CUFF.15398	CUFF.15398.3	chr17	71963314	71972732	+	NONBTAT008894	chr17	71964468	71964786	+
CUFF.23721	CUFF.23721.1	chr21	43876777	44135605	+	NONBTAG008725	chr21	43896868	43897343	+
CUFF.23721	CUFF.23721.1	chr21	43876777	44135605	+	NONBTAT013015	chr21	43896867	43897343	+
CUFF.23721	CUFF.23721.1	chr21	43876777	44135605	+	NONBTAG008728	chr21	44004928	44005347	+
CUFF.23721	CUFF.23721.1	chr21	43876777	44135605	+	NONBTAT013018	chr21	44004927	44005347	+
CUFF.23721	CUFF.23721.1	chr21	43876777	44135605	+	NONBTAG008727	chr21	43990861	43991355	+
CUFF.23721	CUFF.23721.1	chr21	43876777	44135605	+	NONBTAT013017	chr21	43990860	43991355	+
CUFF.26677	CUFF.26677.2	chr23	40202139	40588543	+	NONBTAG009719	chr23	40409445	40409804	+
CUFF.26677	CUFF.26677.2	chr23	40202139	40588543	+	NONBTAT014644	chr23	40409444	40409804	+
CUFF.26677	CUFF.26677.2	chr23	40202139	40588543	+	NONBTAG009718	chr23	40221861	40222778	+
CUFF.26677	CUFF.26677.2	chr23	40202139	40588543	+	NONBTAT014643	chr23	40221860	40222778	+
CUFF.26677	CUFF.26677.3	chr23	40202139	40588543	+	NONBTAG009719	chr23	40409445	40409804	+
CUFF.26677	CUFF.26677.3	chr23	40202139	40588543	+	NONBTAT014644	chr23	40409444	40409804	+
CUFF.26677	CUFF.26677.3	chr23	40202139	40588543	+	NONBTAG009718	chr23	40221861	40222778	+
CUFF.26677	CUFF.26677.3	chr23	40202139	40588543	+	NONBTAT014643	chr23	40221860	40222778	+
CUFF.28013	CUFF.28013.1	chr24	61444649	61447820	+	NONBTAG010202	chr24	61445545	61445787	+
CUFF.28013	CUFF.28013.1	chr24	61444649	61447820	+	NONBTAG010203	chr24	61445926	61446626	+
CUFF.28013	CUFF.28013.1	chr24	61444649	61447820	+	NONBTAG010204	chr24	61446802	61447474	+
CUFF.28013	CUFF.28013.1	chr24	61444649	61447820	+	NONBTAT015346	chr24	61445544	61445787	+
CUFF.28013	CUFF.28013.1	chr24	61444649	61447820	+	NONBTAT015347	chr24	61445925	61446626	+
CUFF.28013	CUFF.28013.1	chr24	61444649	61447820	+	NONBTAT015348	chr24	61446801	61447474	+
CUFF.36520	CUFF.36520.1	chr5	1362218	1396019	+	NONBTAG013638	chr5	1393445	1394120	+
CUFF.36520	CUFF.36520.1	chr5	1362218	1396019	+	NONBTAT020458	chr5	1393444	1394019	+
CUFF.36520	CUFF.36520.1	chr5	1362218	1396019	+	NONBTAT020459	chr5	1393715	1394120	+
CUFF.43405	CUFF.43405.1	chr8	22843300	22874324	+	NONBTAG016083	chr8	22871404	22871738	+
CUFF.43405	CUFF.43405.1	chr8	22843300	22874324	+	NONBTAT024107	chr8	22871403	22871738	+
CUFF.43405	CUFF.43405.1	chr8	22843300	22874324	+	NONBTAG016084	chr8	22873401	22873686	+
CUFF.43405	CUFF.43405.1	chr8	22843300	22874324	+	NONBTAT024108	chr8	22873400	22873686	+
CUFF.10566	CUFF.10566.1	chr14	59774380	59969748	-	NONBTAG004454	chr14	59827476	59827940	-
CUFF.10566	CUFF.10566.1	chr14	59774380	59969748	-	NONBTAT006400	chr14	59827475	59827940	-
CUFF.11034	CUFF.11034.1	chr15	10622116	10711870	-	NONBTAG004665	chr15	10690029	10690488	-
CUFF.11034	CUFF.11034.1	chr15	10622116	10711870	-	NONBTAT006701	chr15	10690028	10690488	-
CUFF.12244	CUFF.12244.1	chr15	72740873	72744846	-	NONBTAG005116	chr15	72742812	72743259	-
CUFF.12244	CUFF.12244.1	chr15	72740873	72744846	-	NONBTAT007395	chr15	72742811	72743259	-
CUFF.14127	CUFF.14127.1	chr17	9005778	9315614	-	NONBTAG005741	chr17	9288492	9288886	-
CUFF.14127	CUFF.14127.1	chr17	9005778	9315614	-	NONBTAT008371	chr17	9288491	9288886	-
CUFF.14429	CUFF.14429.1	chr17	18574693	18576309	+	NONBTAG005824	chr17	18573940	18576478	+
CUFF.14429	CUFF.14429.1	chr17	18574693	18576309	+	NONBTAT008478	chr17	18573939	18576478	+
CUFF.14490	CUFF.14490.1	chr17	31449989	31829949	+	NONBTAG005866	chr17	31815461	31815716	+
CUFF.14490	CUFF.14490.1	chr17	31449989	31829949	+	NONBTAT008539	chr17	31815460	31815716	+
CUFF.14720	CUFF.14720.3	chr17	54576204	54581380	-	NONBTAG005966	chr17	54576591	54576850	-
CUFF.14720	CUFF.14720.3	chr17	54576204	54581380	-	NONBTAT008681	chr17	54576590	54576850	-
CUFF.17018	CUFF.17018.1	chr18	56531777	56534262	-	NONBTAG006466	chr18	56533929	56534260	-
CUFF.17018	CUFF.17018.1	chr18	56531777	56534262	-	NONBTAT009517	chr18	56533928	56534260	-
CUFF.19590	CUFF.19590.1	chr2	966676	973515	-	NONBTAG007037	chr2	963582	967562	-
CUFF.19590	CUFF.19590.1	chr2	966676	973515	-	NONBTAT010568	chr2	963581	967562	-
CUFF.19871	CUFF.19871.1	chr2	18699855	18757446	+	NONBTAG007141	chr2	18737836	18738362	+
CUFF.19871	CUFF.19871.1	chr2	18699855	18757446	+	NONBTAT010713	chr2	18737835	18738362	+
CUFF.19871	CUFF.19871.1	chr2	18699855	18757446	+	NONBTAG007143	chr2	18752678	18752954	+
CUFF.19871	CUFF.19871.1	chr2	18699855	18757446	+	NONBTAT010715	chr2	18752677	18752954	+
CUFF.20300	CUFF.20300.1	chr2	39984364	39994484	-	NONBTAG007356	chr2	39991784	39992441	-
CUFF.20300	CUFF.20300.1	chr2	39984364	39994484	-	NONBTAT011018	chr2	39991783	39992441	-
CUFF.20465	CUFF.20465.1	chr2	51602541	51803360	-	NONBTAG007441	chr2	51799316	51800467	-
CUFF.20465	CUFF.20465.1	chr2	51602541	51803360	-	NONBTAT011135	chr2	51799315	51800467	-
CUFF.2049	CUFF.2049.1	chr1	147852571	147856149	-	NONBTAG001118	chr1	147852341	147856272	-
CUFF.2049	CUFF.2049.1	chr1	147852571	147856149	-	NONBTAT001562	chr1	147852340	147856272	-
CUFF.20620	CUFF.20620.1	chr2	65212990	65216749	-	NONBTAG007540	chr2	65214672	65215465	-
CUFF.20620	CUFF.20620.1	chr2	65212990	65216749	-	NONBTAT011261	chr2	65214671	65215465	-
CUFF.20753	CUFF.20753.1	chr2	80418507	80423974	+	NONBTAG007596	chr2	80418076	80418596	+
CUFF.20753	CUFF.20753.1	chr2	80418507	80423974	+	NONBTAT011344	chr2	80418075	80418596	+
CUFF.20967	CUFF.20967.2	chr2	93289727	93451728	+	NONBTAG007707	chr2	93328878	93329326	+
CUFF.20967	CUFF.20967.2	chr2	93289727	93451728	+	NONBTAT011499	chr2	93328877	93329326	+
CUFF.21036	CUFF.21036.1	chr2	96101272	96105267	+	NONBTAG007733	chr2	96072914	96105769	+
CUFF.21036	CUFF.21036.1	chr2	96101272	96105267	+	NONBTAT011538	chr2	96072913	96105769	+
CUFF.21036	CUFF.21036.2	chr2	96101841	96105267	+	NONBTAG007733	chr2	96072914	96105769	+
CUFF.21036	CUFF.21036.2	chr2	96101841	96105267	+	NONBTAT011538	chr2	96072913	96105769	+
CUFF.21316	CUFF.21316.1	chr2	115731736	115756902	-	NONBTAG007890	chr2	115731249	115731948	-
CUFF.21316	CUFF.21316.1	chr2	115731736	115756902	-	NONBTAT011751	chr2	115731248	115731948	-
CUFF.22116	CUFF.22116.1	chr20	14409891	14417352	+	NONBTAG008195	chr20	14409880	14424525	+
CUFF.22116	CUFF.22116.1	chr20	14409891	14417352	+	NONBTAT012209	chr20	14409879	14424525	+
CUFF.22435	CUFF.22435.1	chr20	32287644	32597268	-	NONBTAG008345	chr20	32543280	32543749	-
CUFF.22435	CUFF.22435.1	chr20	32287644	32597268	-	NONBTAT012416	chr20	32543279	32543749	-
CUFF.22711	CUFF.22711.1	chr20	59066188	59067952	+	NONBTAG008489	chr20	59067114	59067474	+
CUFF.22711	CUFF.22711.1	chr20	59066188	59067952	+	NONBTAT012612	chr20	59067113	59067474	+
CUFF.22711	CUFF.22711.2	chr20	59066217	59067952	+	NONBTAG008489	chr20	59067114	59067474	+
CUFF.22711	CUFF.22711.2	chr20	59066217	59067952	+	NONBTAT012612	chr20	59067113	59067474	+
CUFF.22945	CUFF.22945.1	chr21	14507552	14519318	-	NONBTAG008591	chr21	14508359	14509889	-
CUFF.22945	CUFF.22945.1	chr21	14507552	14519318	-	NONBTAG008592	chr21	14513660	14514154	-
CUFF.22945	CUFF.22945.1	chr21	14507552	14519318	-	NONBTAT012809	chr21	14508358	14509889	-
CUFF.22945	CUFF.22945.1	chr21	14507552	14519318	-	NONBTAT012811	chr21	14513659	14514154	-
CUFF.22945	CUFF.22945.1	chr21	14507552	14519318	-	NONBTAG008590	chr21	14507808	14520562	-
CUFF.22945	CUFF.22945.1	chr21	14507552	14519318	-	NONBTAT012808	chr21	14507807	14520562	-
CUFF.2345	CUFF.2345.1	chr10	8328745	8349327	+	NONBTAG001250	chr10	8342126	8342333	+
CUFF.2345	CUFF.2345.1	chr10	8328745	8349327	+	NONBTAT001757	chr10	8342125	8342333	+
CUFF.23550	CUFF.23550.1	chr21	39547410	39561842	-	NONBTAG008697	chr21	39555356	39555719	-
CUFF.23550	CUFF.23550.1	chr21	39547410	39561842	-	NONBTAT012970	chr21	39555355	39555719	-
CUFF.24340	CUFF.24340.1	chr22	9920978	10043593	+	NONBTAG008991	chr22	9921078	9925071	+
CUFF.24340	CUFF.24340.1	chr22	9920978	10043593	+	NONBTAT013537	chr22	9921077	9925071	+
CUFF.24340	CUFF.24340.2	chr22	9920978	9923118	+	NONBTAG008991	chr22	9921078	9925071	+
CUFF.24340	CUFF.24340.2	chr22	9920978	9923118	+	NONBTAT013537	chr22	9921077	9925071	+
CUFF.24910	CUFF.24910.1	chr22	32897020	32906984	+	NONBTAG009175	chr22	32906416	32906704	+
CUFF.24910	CUFF.24910.1	chr22	32897020	32906984	+	NONBTAT013797	chr22	32906415	32906704	+
CUFF.25014	CUFF.25014.1	chr22	37676913	37717421	-	NONBTAG009222	chr22	37713698	37714021	-
CUFF.25014	CUFF.25014.1	chr22	37676913	37717421	-	NONBTAT013862	chr22	37713697	37714021	-
CUFF.26533	CUFF.26533.1	chr23	35378916	35381157	+	NONBTAG009685	chr23	35375678	35380363	+
CUFF.26533	CUFF.26533.1	chr23	35378916	35381157	+	NONBTAT014590	chr23	35375677	35380363	+
CUFF.26616	CUFF.26616.1	chr23	38115031	38139725	+	NONBTAG009706	chr23	38132116	38135372	+
CUFF.26616	CUFF.26616.1	chr23	38115031	38139725	+	NONBTAT014619	chr23	38132115	38135372	+
CUFF.26616	CUFF.26616.2	chr23	38115031	38146216	+	NONBTAG009706	chr23	38132116	38135372	+
CUFF.26616	CUFF.26616.2	chr23	38115031	38146216	+	NONBTAT014619	chr23	38132115	38135372	+
CUFF.26734	CUFF.26734.1	chr23	41484898	41486521	-	NONBTAG009731	chr23	41472388	41487179	-
CUFF.26734	CUFF.26734.1	chr23	41484898	41486521	-	NONBTAT014663	chr23	41472387	41487179	-
CUFF.26832	CUFF.26832.3	chr23	45301129	45303420	+	NONBTAG009770	chr23	45287750	45303615	+
CUFF.26832	CUFF.26832.3	chr23	45301129	45303420	+	NONBTAT014708	chr23	45287749	45303615	+
CUFF.26832	CUFF.26832.3	chr23	45301129	45303420	+	NONBTAT014709	chr23	45287749	45303615	+
CUFF.26832	CUFF.26832.3	chr23	45301129	45303420	+	NONBTAT014710	chr23	45287749	45303615	+
CUFF.273	CUFF.273.1	chr1	43078119	43153408	-	NONBTAG000242	chr1	43091321	43091642	-
CUFF.273	CUFF.273.1	chr1	43078119	43153408	-	NONBTAT000337	chr1	43091320	43091642	-
CUFF.27898	CUFF.27898.1	chr24	57241397	57246707	+	NONBTAG010168	chr24	57244913	57245452	+
CUFF.27898	CUFF.27898.1	chr24	57241397	57246707	+	NONBTAT015302	chr24	57244912	57245452	+
CUFF.27898	CUFF.27898.1	chr24	57241397	57246707	+	NONBTAG010169	chr24	57245554	57246570	+
CUFF.27898	CUFF.27898.1	chr24	57241397	57246707	+	NONBTAT015303	chr24	57245553	57246570	+
CUFF.28336	CUFF.28336.1	chr25	11366659	11373130	+	NONBTAG010276	chr25	11367492	11367843	+
CUFF.28336	CUFF.28336.1	chr25	11366659	11373130	+	NONBTAT015502	chr25	11367491	11367843	+
CUFF.28546	CUFF.28546.1	chr25	22301161	22303898	-	NONBTAG010342	chr25	22303554	22304197	-
CUFF.28546	CUFF.28546.1	chr25	22301161	22303898	-	NONBTAT015595	chr25	22303553	22304197	-
CUFF.28790	CUFF.28790.1	chr25	30744997	30782894	+	NONBTAG010406	chr25	30762539	30762911	+
CUFF.28790	CUFF.28790.1	chr25	30744997	30782894	+	NONBTAT015690	chr25	30762538	30762911	+
CUFF.28790	CUFF.28790.1	chr25	30744997	30782894	+	NONBTAG010409	chr25	30778622	30779292	+
CUFF.28790	CUFF.28790.1	chr25	30744997	30782894	+	NONBTAT015693	chr25	30778621	30779292	+
CUFF.29284	CUFF.29284.2	chr26	8849312	9036283	-	NONBTAG010537	chr26	8871776	8872458	-
CUFF.29284	CUFF.29284.2	chr26	8849312	9036283	-	NONBTAT015916	chr26	8871775	8872458	-
CUFF.30297	CUFF.30297.1	chr27	10830882	10978973	+	NONBTAG010896	chr27	10831419	10832064	+
CUFF.30297	CUFF.30297.1	chr27	10830882	10978973	+	NONBTAT016453	chr27	10831418	10832064	+
CUFF.30477	CUFF.30477.1	chr27	17783541	17788124	+	NONBTAG010964	chr27	17784028	17786392	+
CUFF.30477	CUFF.30477.1	chr27	17783541	17788124	+	NONBTAT016528	chr27	17784027	17786392	+
CUFF.30477	CUFF.30477.2	chr27	17783917	17788124	+	NONBTAG010964	chr27	17784028	17786392	+
CUFF.30477	CUFF.30477.2	chr27	17783917	17788124	+	NONBTAT016528	chr27	17784027	17786392	+
CUFF.30597	CUFF.30597.1	chr27	23981197	23989025	-	NONBTAG011021	chr27	23980805	23981265	-
CUFF.30597	CUFF.30597.1	chr27	23981197	23989025	-	NONBTAT016609	chr27	23980804	23981265	-
CUFF.31129	CUFF.31129.1	chr28	12248934	12621053	+	NONBTAG011244	chr28	12488949	12489356	+
CUFF.31129	CUFF.31129.1	chr28	12248934	12621053	+	NONBTAT016950	chr28	12488948	12489356	+
CUFF.31129	CUFF.31129.1	chr28	12248934	12621053	+	NONBTAG011245	chr28	12559579	12559924	+
CUFF.31129	CUFF.31129.1	chr28	12248934	12621053	+	NONBTAT016951	chr28	12559578	12559924	+
CUFF.31129	CUFF.31129.1	chr28	12248934	12621053	+	NONBTAG011246	chr28	12611199	12611726	+
CUFF.31129	CUFF.31129.1	chr28	12248934	12621053	+	NONBTAT016952	chr28	12611198	12611726	+
CUFF.31331	CUFF.31331.3	chr28	24901261	24904279	-	NONBTAG011342	chr28	24902324	24902674	-
CUFF.31331	CUFF.31331.3	chr28	24901261	24904279	-	NONBTAT017082	chr28	24902323	24902674	-
CUFF.31530	CUFF.31530.1	chr28	31338729	31347670	+	NONBTAG011411	chr28	31346214	31348786	+
CUFF.31530	CUFF.31530.1	chr28	31338729	31347670	+	NONBTAT017186	chr28	31346213	31348786	+
CUFF.31530	CUFF.31530.2	chr28	31338729	31347670	+	NONBTAG011411	chr28	31346214	31348786	+
CUFF.31530	CUFF.31530.2	chr28	31338729	31347670	+	NONBTAT017186	chr28	31346213	31348786	+
CUFF.3337	CUFF.3337.1	chr10	46943294	46945546	+	NONBTAG001579	chr10	46945175	46945526	+
CUFF.3337	CUFF.3337.1	chr10	46943294	46945546	+	NONBTAT002229	chr10	46945174	46945526	+
CUFF.3379	CUFF.3379.1	chr10	48376483	48548607	+	NONBTAG001595	chr10	48540629	48540986	+
CUFF.3379	CUFF.3379.1	chr10	48376483	48548607	+	NONBTAT002254	chr10	48540628	48540986	+
CUFF.35122	CUFF.35122.1	chr4	53128603	53349093	+	NONBTAG013073	chr4	53153303	53154078	+
CUFF.35122	CUFF.35122.1	chr4	53128603	53349093	+	NONBTAT019647	chr4	53153302	53154078	+
CUFF.35122	CUFF.35122.2	chr4	53128603	53349093	+	NONBTAG013073	chr4	53153303	53154078	+
CUFF.35122	CUFF.35122.2	chr4	53128603	53349093	+	NONBTAT019647	chr4	53153302	53154078	+
CUFF.36579	CUFF.36579.1	chr5	6778052	6947452	+	NONBTAG013670	chr5	6895459	6895668	+
CUFF.36579	CUFF.36579.1	chr5	6778052	6947452	+	NONBTAT020503	chr5	6895458	6895668	+
CUFF.36579	CUFF.36579.1	chr5	6778052	6947452	+	NONBTAT020505	chr5	6947023	6947650	+
CUFF.36579	CUFF.36579.1	chr5	6778052	6947452	+	NONBTAG013671	chr5	6943777	6947650	+
CUFF.36579	CUFF.36579.1	chr5	6778052	6947452	+	NONBTAT020504	chr5	6943776	6947650	+
CUFF.36579	CUFF.36579.2	chr5	6943815	6947452	+	NONBTAT020505	chr5	6947023	6947650	+
CUFF.36579	CUFF.36579.2	chr5	6943815	6947452	+	NONBTAG013671	chr5	6943777	6947650	+
CUFF.36579	CUFF.36579.2	chr5	6943815	6947452	+	NONBTAT020504	chr5	6943776	6947650	+
CUFF.37281	CUFF.37281.1	chr5	46757640	46766915	+	NONBTAG013962	chr5	46754168	46767073	+
CUFF.37281	CUFF.37281.1	chr5	46757640	46766915	+	NONBTAT020930	chr5	46754167	46766943	+
CUFF.37281	CUFF.37281.1	chr5	46757640	46766915	+	NONBTAT020931	chr5	46754167	46767073	+
CUFF.37281	CUFF.37281.1	chr5	46757640	46766915	+	NONBTAT020932	chr5	46754184	46766583	+
CUFF.37668	CUFF.37668.3	chr5	64821302	64824314	+	NONBTAG014081	chr5	64821307	64823616	+
CUFF.37668	CUFF.37668.3	chr5	64821302	64824314	+	NONBTAT021126	chr5	64821306	64823616	+
CUFF.37996	CUFF.37996.1	chr5	87962458	87964268	-	NONBTAG014241	chr5	87963079	87963292	-
CUFF.37996	CUFF.37996.1	chr5	87962458	87964268	-	NONBTAT021357	chr5	87963078	87963292	-
CUFF.3801	CUFF.3801.1	chr10	62674955	62694433	+	NONBTAG001733	chr10	62692151	62692637	+
CUFF.3801	CUFF.3801.1	chr10	62674955	62694433	+	NONBTAT002458	chr10	62692150	62692637	+
CUFF.38150	CUFF.38150.1	chr5	98635913	98697897	-	NONBTAG014332	chr5	98678988	98679497	-
CUFF.38150	CUFF.38150.1	chr5	98635913	98697897	-	NONBTAT021479	chr5	98678987	98679497	-
CUFF.38150	CUFF.38150.1	chr5	98635913	98697897	-	NONBTAG014333	chr5	98684828	98685198	-
CUFF.38150	CUFF.38150.1	chr5	98635913	98697897	-	NONBTAT021480	chr5	98684827	98685198	-
CUFF.3868	CUFF.3868.1	chr10	66976304	66983391	+	NONBTAG001761	chr10	66976181	66983537	+
CUFF.3868	CUFF.3868.1	chr10	66976304	66983391	+	NONBTAT002499	chr10	66976180	66983537	+
CUFF.39315	CUFF.39315.1	chr6	38608855	38611468	-	NONBTAG014734	chr6	38609744	38610447	-
CUFF.39315	CUFF.39315.1	chr6	38608855	38611468	-	NONBTAT022094	chr6	38609743	38610447	-
CUFF.39394	CUFF.39394.1	chr6	45938771	45940128	+	NONBTAG014784	chr6	45938189	45939941	+
CUFF.39394	CUFF.39394.1	chr6	45938771	45940128	+	NONBTAT022159	chr6	45938188	45939941	+
CUFF.39693	CUFF.39693.2	chr6	69009215	69080368	-	NONBTAG014933	chr6	69026838	69027275	-
CUFF.39693	CUFF.39693.2	chr6	69009215	69080368	-	NONBTAT022361	chr6	69026837	69027275	-
CUFF.39693	CUFF.39693.3	chr6	69025297	69080368	-	NONBTAG014933	chr6	69026838	69027275	-
CUFF.39693	CUFF.39693.3	chr6	69025297	69080368	-	NONBTAT022361	chr6	69026837	69027275	-
CUFF.402	CUFF.402.1	chr1	53369169	53413141	+	NONBTAG000310	chr1	53409851	53412929	+
CUFF.402	CUFF.402.1	chr1	53369169	53413141	+	NONBTAT000434	chr1	53409850	53412929	+
CUFF.402	CUFF.402.2	chr1	53403640	53413141	+	NONBTAG000310	chr1	53409851	53412929	+
CUFF.402	CUFF.402.2	chr1	53403640	53413141	+	NONBTAT000434	chr1	53409850	53412929	+
CUFF.40290	CUFF.40290.2	chr6	115667491	115672689	+	NONBTAG015217	chr6	115667504	115672648	+
CUFF.40290	CUFF.40290.2	chr6	115667491	115672689	+	NONBTAT022788	chr6	115667503	115672648	+
CUFF.40290	CUFF.40290.3	chr6	115667491	115672689	+	NONBTAG015217	chr6	115667504	115672648	+
CUFF.40290	CUFF.40290.3	chr6	115667491	115672689	+	NONBTAT022788	chr6	115667503	115672648	+
CUFF.41341	CUFF.41341.1	chr7	37678920	37965253	-	NONBTAG015430	chr7	37798142	37798622	-
CUFF.41341	CUFF.41341.1	chr7	37678920	37965253	-	NONBTAT023154	chr7	37798141	37798622	-
CUFF.41341	CUFF.41341.2	chr7	37678920	37965282	-	NONBTAG015430	chr7	37798142	37798622	-
CUFF.41341	CUFF.41341.2	chr7	37678920	37965282	-	NONBTAT023154	chr7	37798141	37798622	-
CUFF.41341	CUFF.41341.3	chr7	37708553	37965249	-	NONBTAG015430	chr7	37798142	37798622	-
CUFF.41341	CUFF.41341.3	chr7	37708553	37965249	-	NONBTAT023154	chr7	37798141	37798622	-
CUFF.41341	CUFF.41341.4	chr7	37708553	37965253	-	NONBTAG015430	chr7	37798142	37798622	-
CUFF.41341	CUFF.41341.4	chr7	37708553	37965253	-	NONBTAT023154	chr7	37798141	37798622	-
CUFF.42153	CUFF.42153.2	chr7	64817718	64838837	+	NONBTAG015644	chr7	64829754	64830055	+
CUFF.42153	CUFF.42153.2	chr7	64817718	64838837	+	NONBTAT023503	chr7	64829753	64830055	+
CUFF.42445	CUFF.42445.1	chr7	78712612	78714497	+	NONBTAG015719	chr7	78714330	78714875	+
CUFF.42445	CUFF.42445.1	chr7	78712612	78714497	+	NONBTAT023619	chr7	78714329	78714875	+
CUFF.42445	CUFF.42445.2	chr7	78712612	78714497	+	NONBTAG015719	chr7	78714330	78714875	+
CUFF.42445	CUFF.42445.2	chr7	78712612	78714497	+	NONBTAT023619	chr7	78714329	78714875	+
CUFF.42445	CUFF.42445.3	chr7	78712612	78719197	+	NONBTAG015719	chr7	78714330	78714875	+
CUFF.42445	CUFF.42445.3	chr7	78712612	78719197	+	NONBTAT023619	chr7	78714329	78714875	+
CUFF.42652	CUFF.42652.1	chr7	90363040	90460753	-	NONBTAG015788	chr7	90329927	90572691	-
CUFF.42652	CUFF.42652.1	chr7	90363040	90460753	-	NONBTAT023716	chr7	90329926	90572691	-
CUFF.42652	CUFF.42652.1	chr7	90363040	90460753	-	NONBTAT023717	chr7	90362995	90572656	-
CUFF.42753	CUFF.42753.1	chr7	95210255	95211388	-	NONBTAG015816	chr7	95210527	95415713	-
CUFF.42753	CUFF.42753.1	chr7	95210255	95211388	-	NONBTAT023757	chr7	95210526	95415713	-
CUFF.42912	CUFF.42912.1	chr7	101371121	101473788	+	NONBTAG015876	chr7	101387286	101387607	+
CUFF.42912	CUFF.42912.1	chr7	101371121	101473788	+	NONBTAT023826	chr7	101387285	101387607	+
CUFF.42936	CUFF.42936.1	chr7	105045194	105174053	+	NONBTAG015908	chr7	105044142	105052443	+
CUFF.42936	CUFF.42936.1	chr7	105045194	105174053	+	NONBTAT023868	chr7	105044141	105052443	+
CUFF.43510	CUFF.43510.1	chr8	26051996	26107964	-	NONBTAG016114	chr8	26074594	26075203	-
CUFF.43510	CUFF.43510.1	chr8	26051996	26107964	-	NONBTAT024149	chr8	26074593	26075203	-
CUFF.44728	CUFF.44728.1	chr8	84538531	84541147	+	NONBTAG016528	chr8	84537438	84541074	+
CUFF.44728	CUFF.44728.1	chr8	84538531	84541147	+	NONBTAT024780	chr8	84537437	84541074	+
CUFF.45218	CUFF.45218.1	chr8	111673162	111675439	-	NONBTAG016677	chr8	111673163	111675461	-
CUFF.45218	CUFF.45218.1	chr8	111673162	111675439	-	NONBTAT025011	chr8	111673162	111675461	-
CUFF.45667	CUFF.45667.1	chr9	35170685	35676901	+	NONBTAG016889	chr9	35377177	35377597	+
CUFF.45667	CUFF.45667.1	chr9	35170685	35676901	+	NONBTAT025299	chr9	35377176	35377597	+
CUFF.46157	CUFF.46157.1	chr9	60494147	60555492	-	NONBTAG017070	chr9	60533280	60533925	-
CUFF.46157	CUFF.46157.1	chr9	60494147	60555492	-	NONBTAT025539	chr9	60533279	60533925	-
CUFF.46316	CUFF.46316.1	chr9	74848304	74954840	+	NONBTAG017192	chr9	74855635	74856002	+
CUFF.46316	CUFF.46316.1	chr9	74848304	74954840	+	NONBTAT025723	chr9	74855634	74856002	+
CUFF.46316	CUFF.46316.1	chr9	74848304	74954840	+	NONBTAG017193	chr9	74871035	74871359	+
CUFF.46316	CUFF.46316.1	chr9	74848304	74954840	+	NONBTAT025724	chr9	74871034	74871359	+
CUFF.47318	CUFF.47318.1	chrX	47702287	47751274	-	NONBTAG017627	chrX	47704320	47704754	-
CUFF.47318	CUFF.47318.1	chrX	47702287	47751274	-	NONBTAT026438	chrX	47704319	47704754	-
CUFF.47672	CUFF.47672.1	chrX	82028101	82028544	+	NONBTAG017759	chrX	82024474	82029134	+
CUFF.47672	CUFF.47672.1	chrX	82028101	82028544	+	NONBTAT026653	chrX	82024473	82028666	+
CUFF.47672	CUFF.47672.1	chrX	82028101	82028544	+	NONBTAT026655	chrX	82026744	82029134	+
CUFF.47672	CUFF.47672.1	chrX	82028101	82028544	+	NONBTAT026657	chrX	82028165	82028450	+
CUFF.47676	CUFF.47676.1	chrX	82286126	82287697	+	NONBTAG017762	chrX	82260946	82294467	+
CUFF.47676	CUFF.47676.1	chrX	82286126	82287697	+	NONBTAT026661	chrX	82261155	82294467	+
CUFF.47676	CUFF.47676.1	chrX	82286126	82287697	+	NONBTAT026662	chrX	82261155	82294353	+
CUFF.48275	CUFF.48275.1	chrX	120893916	121054242	-	NONBTAG017925	chrX	120894604	120894974	-
CUFF.48275	CUFF.48275.1	chrX	120893916	121054242	-	NONBTAT026925	chrX	120894603	120894974	-
CUFF.48275	CUFF.48275.1	chrX	120893916	121054242	-	NONBTAG017926	chrX	121024021	121024543	-
CUFF.48275	CUFF.48275.1	chrX	120893916	121054242	-	NONBTAT026927	chrX	121024020	121024543	-
CUFF.48358	CUFF.48358.1	chrX	126305404	126307750	+	NONBTAG017947	chrX	126305333	126308078	+
CUFF.48358	CUFF.48358.1	chrX	126305404	126307750	+	NONBTAT026963	chrX	126305332	126306049	+
CUFF.48358	CUFF.48358.1	chrX	126305404	126307750	+	NONBTAT026964	chrX	126305932	126306453	+
CUFF.48358	CUFF.48358.1	chrX	126305404	126307750	+	NONBTAT026965	chrX	126306231	126307722	+
CUFF.48358	CUFF.48358.1	chrX	126305404	126307750	+	NONBTAT026966	chrX	126307534	126308078	+
CUFF.6284	CUFF.6284.1	chr11	77218021	77459715	-	NONBTAG002673	chr11	77273314	77273772	-
CUFF.6284	CUFF.6284.1	chr11	77218021	77459715	-	NONBTAT003778	chr11	77273313	77273772	-
CUFF.7014	CUFF.7014.1	chr12	15887863	15905068	+	NONBTAG002938	chr12	15895136	15895923	+
CUFF.7014	CUFF.7014.1	chr12	15887863	15905068	+	NONBTAT004194	chr12	15895135	15895923	+
CUFF.7014	CUFF.7014.2	chr12	15887863	15905068	+	NONBTAG002938	chr12	15895136	15895923	+
CUFF.7014	CUFF.7014.2	chr12	15887863	15905068	+	NONBTAT004194	chr12	15895135	15895923	+
CUFF.7014	CUFF.7014.3	chr12	15887863	15897398	+	NONBTAG002938	chr12	15895136	15895923	+
CUFF.7014	CUFF.7014.3	chr12	15887863	15897398	+	NONBTAT004194	chr12	15895135	15895923	+
CUFF.7159	CUFF.7159.1	chr12	21733937	21745245	+	NONBTAG003017	chr12	21736232	21737839	+
CUFF.7159	CUFF.7159.1	chr12	21733937	21745245	+	NONBTAT004295	chr12	21736231	21737839	+
CUFF.7159	CUFF.7159.2	chr12	21737167	21746618	+	NONBTAG003017	chr12	21736232	21737839	+
CUFF.7159	CUFF.7159.2	chr12	21737167	21746618	+	NONBTAT004295	chr12	21736231	21737839	+
CUFF.74	CUFF.74.1	chr1	3763816	3774497	+	NONBTAG000033	chr1	3770564	3771071	+
CUFF.74	CUFF.74.1	chr1	3763816	3774497	+	NONBTAT000050	chr1	3770563	3771071	+
CUFF.74	CUFF.74.2	chr1	3763816	3774497	+	NONBTAG000033	chr1	3770564	3771071	+
CUFF.74	CUFF.74.2	chr1	3763816	3774497	+	NONBTAT000050	chr1	3770563	3771071	+
CUFF.74	CUFF.74.3	chr1	3763816	3774497	+	NONBTAG000033	chr1	3770564	3771071	+
CUFF.74	CUFF.74.3	chr1	3763816	3774497	+	NONBTAT000050	chr1	3770563	3771071	+
CUFF.7664	CUFF.7664.1	chr12	67793452	67936141	-	NONBTAG003313	chr12	67870333	67870816	-
CUFF.7664	CUFF.7664.1	chr12	67793452	67936141	-	NONBTAT004704	chr12	67870332	67870816	-
CUFF.7808	CUFF.7808.1	chr12	77382417	77427103	+	NONBTAG003336	chr12	77402569	77403065	+
CUFF.7808	CUFF.7808.1	chr12	77382417	77427103	+	NONBTAT004742	chr12	77402568	77403065	+
CUFF.8244	CUFF.8244.3	chr13	13022092	13037355	-	NONBTAG003532	chr13	13035960	13036503	-
CUFF.8244	CUFF.8244.3	chr13	13022092	13037355	-	NONBTAT005005	chr13	13035959	13036503	-
CUFF.9582	CUFF.9582.1	chr13	78104574	78105513	+	NONBTAG004043	chr13	78103244	78105503	+
CUFF.9582	CUFF.9582.1	chr13	78104574	78105513	+	NONBTAT005775	chr13	78103243	78105503	+
