# Supplementary material for: Systematic identification of long intergenic non-coding RNAs expressed in bovine oocytes
Source: Reprod Biol Endocrinol. 2020 Feb 21;18:13. doi: 10.1186/s12958-020-00573-4 (PMC7035783; doi:10.1186/s12958-020-00573-4)
Supplement: Supplementary file 3 — Additional file 3: Table S3. Expression of lincRNAs in bovine oocytes relative to 9 other tissues. [file 12958_2020_573_MOESM3_ESM.xlsx]

## Sheet: LincRNA_expression.csv
Additional file 3: Table S3. Expression of lincRNAs in bovine oocytes relative to 9 other tissues (FPKM)
LincRNA	Genome_location	Strand	Oocyte	Testes	Spleen	Skeletal_Muscle	Lung	Liver	Kidney	Heart	Colon	Brain
CUFF.64.1	chr1:3288583-3296143	-	0.95163	0	0	0	0	0	0	0	0	0
CUFF.74.1	chr1:3763816-3774497	+	24.4452	1e-06	0	0	0	0	0	0	0	4e-06
CUFF.74.2	chr1:3763816-3774497	+	46.1777	0.995764	0	0	0	0	0	0	0	0.494439
CUFF.74.3	chr1:3763816-3774497	+	10.5015	0.000581	0	0	0	0	0	0	0	1e-06
CUFF.123.1	chr1:18379438-18505996	-	4.48315	0	0	0	0	0	0	0	0	0
CUFF.127.1	chr1:18831427-18881711	-	15.3878	0.373055	0	0	0	0	0	0	0	0
CUFF.142.2	chr1:22597816-22721903	+	3.24804	0	0	0	0	0	0	0	0	2.59651
CUFF.169.1	chr1:28484456-28515736	-	4.06686	0	0	0	0	0	0	0	0	0
CUFF.173.2	chr1:29329097-29330201	-	4.79526	0	0	0	0	0	0	0	0	0
CUFF.173.1	chr1:29329097-29330956	-	3.88662	0	0	0	0	0	0	0	0	0
CUFF.212.1	chr1:35813964-35821738	-	16.4156	0	0.337658	0	0.307149	0	0.485599	0	0.242169	0.349595
CUFF.212.3	chr1:35815245-35821734	-	2.54365	0	0	0	0	0	0	0	0	0
CUFF.212.2	chr1:35815245-35821742	-	14.0185	0	0	0	0	0	0	0	0	0
CUFF.260.1	chr1:42656174-42659366	-	8.16206	0	0	0	0	0.01699	0	0	0	0
CUFF.273.1	chr1:43078119-43153408	-	21.555	0	0	0	0	0	0	0	0	0
CUFF.278.1	chr1:43148822-43149611	-	40.8105	0	0	0	0	0	0	0	0	0
CUFF.362.1	chr1:46650142-46692126	+	9.48365	2.50325	0	0.975829	0	0	0	0	0	0
CUFF.402.1	chr1:53369169-53413141	+	9.35859	0.329967	0	2e-06	0	0	0	0	0	0
CUFF.402.2	chr1:53403640-53413141	+	12.6893	0	0	0.154737	0	0	0	0	0	0
CUFF.465.1	chr1:58329950-58360668	-	5.14659	0	0	0	0	0	0	0	0	0
CUFF.466.1	chr1:58362610-58379082	+	2.32091	0	0	0	0	0	0.06767	0	0	0
CUFF.466.2	chr1:58362610-58379082	+	1.20216	0	0	0	0	0	6.4e-05	0	0	0
CUFF.540.1	chr1:63392877-63393806	+	22.5539	0	0	0	0	0	0	0	0	0
CUFF.554.1	chr1:63718677-63733469	-	1.40442	0	0	0	0	0	0	0.001103	0	0
CUFF.554.2	chr1:63729688-63733469	-	1.6598	0	0	0	0	0	0	0.042153	0	0
CUFF.570.1	chr1:64250412-64271961	-	17.5473	0	0	0	0	0	0	0	0	0
CUFF.607.1	chr1:65649027-65650328	+	4.80499	0.2343	0	0	0.134987	0.246638	0	0	0	0.140686
CUFF.631.1	chr1:66096452-66145175	+	86.3471	0	0	0	0	0	0.120748	0	0	0.079121
CUFF.868.1	chr1:73132229-73136716	+	3.59675	0	0	0	0	0	0	0	0	0
CUFF.876.1	chr1:73300052-73301165	+	2.27757	0	0	0	0	0	0	0	0	0
CUFF.899.1	chr1:74652935-74654662	-	1.05068	0	0	0	0	0	0	0	0	0
CUFF.972.1	chr1:80722455-80732120	+	0.9157	5.46765	0	0.57385	0	0	0	0	0	0
CUFF.982.1	chr1:80882653-80887622	+	3.86656	0	0	0	0	0	0	0	0	0
CUFF.1027.1	chr1:83052921-83053887	-	11.1863	0	0	0	0	0	0	0	0	0
CUFF.1030.3	chr1:83094019-83135253	-	0.954051	0	0	0.001497	0.000987	0	0	0	0.001575	0.001044
CUFF.1030.1	chr1:83094019-83135260	-	3.00552	0	0	0.122214	0.083553	0	0	0	0.30862	0.087664
CUFF.1030.2	chr1:83094019-83135311	-	0.626656	0	0	4e-06	3e-06	0	0	0	1e-06	3e-06
CUFF.1033.1	chr1:83159563-83160058	+	15.1444	0	0	0	0	0	0	0	0	0
CUFF.1091.2	chr1:84268391-84318180	+	21.3437	0	0	0	0.678916	0.824214	2.14108	0	0	4.31983
CUFF.1117.1	chr1:85157064-85179126	+	6.69536	0	0	0	0	0	0	0	0	0
CUFF.1149.2	chr1:86466493-86514656	-	7.01471	0	0	0	0	0	0	0	0	0
CUFF.1149.1	chr1:86466493-86598971	-	1.31515	0	0	0	0	0	0	0	0	0
CUFF.1181.1	chr1:88403742-88405030	+	12.7989	0.039182	0	0	0	0	0	0	0	0
CUFF.1204.1	chr1:90323106-90334662	-	6.53196	0	0	0	0	0	0	0	0	0
CUFF.1214.1	chr1:90692488-90693124	-	3.43718	0	0	0	0	0	0	0	0	0
CUFF.1218.1	chr1:90695050-90716496	+	3.67651	0	0	0	0	0	0	0	0	0.137116
CUFF.1218.2	chr1:90695050-90862333	+	6.3117	0.102425	0.020346	0	0.036989	0	0	0	0	1e-06
CUFF.1248.1	chr1:93498487-93502660	-	10.7696	0	0	0	0	0	0	0	0	0
CUFF.1409.2	chr1:95817781-95821785	+	2.52914	0.516511	0	0.279474	0	0	0	0	0	0.768474
CUFF.1383.1	chr1:106606695-106609553	+	7.42894	0	0	0	0	0	0.048014	0	0	0
CUFF.1386.1	chr1:106661885-106684092	-	1.7318	0.562511	0	0	0	0	0	0	0	0
CUFF.1387.1	chr1:106798173-106804083	-	9.91737	0.579943	0	0	0	0	0	0	0	0
CUFF.1490.2	chr1:112816329-112818371	+	8.10491	0.078909	0	0	0	0	0.178931	0	0.311174	0.059327
CUFF.1502.1	chr1:113175675-113321891	-	6.39732	0	0	0	0	0	0	0	0	0
CUFF.1502.2	chr1:113250949-113321891	-	6.48363	0	0	0	0	0	0	0	0	0
CUFF.1502.3	chr1:113268291-113321891	-	0.944176	0	0	0	0	0	0	0	0	0
CUFF.1502.4	chr1:113268291-113321891	-	5.22995	0	0	0	0	0	0	0	0	0
CUFF.1553.1	chr1:116394644-116429422	-	2.77816	1.78525	15.8433	16.1541	11.1911	3.85072	8.97105	6.13383	24.4728	9.07683
CUFF.1587.1	chr1:118237665-118241316	-	2.7665	0	0	0	0	0	0.301778	0	0	0
CUFF.1610.1	chr1:118803095-118808802	-	10.9379	0	0	0.031217	0	0	0	0	0	0
CUFF.1617.1	chr1:118991705-119073289	+	34.9267	4.44277	0	0.629452	0	0	0	0	0	0.044336
CUFF.1666.1	chr1:121907177-121907991	+	4.8564	0	0	0	0	0	0	0	0	0
CUFF.1670.1	chr1:122283426-122357306	-	15.7702	2.06991	0	0	0	0	0	0	0	0
CUFF.1670.2	chr1:122335849-122357308	-	5.7868	0.48503	0	0	0	0	0	0	0	0
CUFF.1670.4	chr1:122356336-122357306	-	7.58595	0	0	0	0	0	0	0	0	0
CUFF.1678.3	chr1:122626587-122676937	-	2.3254	2.8e-05	2.6e-05	0	2.3e-05	0	0	0	0	2.5e-05
CUFF.1678.4	chr1:122626587-122676937	-	5.26942	0	0	0	0	0	0	0	0	0
CUFF.1678.1	chr1:122626587-122676987	-	1.09728	0.000105	7.7e-05	0	6.8e-05	0	0	0	0	7.5e-05
CUFF.1678.2	chr1:122626587-122676987	-	1.10214	0.056866	0.014672	0	0.013338	0	0	0	0	0.014248
CUFF.1681.1	chr1:125885383-125895122	+	2.26358	0.000548	0.00025	0.000423	0.00042	0.000275	0.000433	0.000268	0.000349	1.33627
CUFF.1681.2	chr1:125885477-125895122	+	5.17472	1.92045	2.84176	10.9602	6.51078	7.59666	7.69031	8.91588	2.20991	12.9845
CUFF.1709.1	chr1:127448872-127450467	+	6.47466	0	0	0	0	0	0	0	0	0
CUFF.1750.1	chr1:129803110-129804058	-	2.93164	0	0	0	0	0	0	0	0	0
CUFF.2049.1	chr1:147852571-147856149	-	1.96334	101.597	1.86086	13.7904	0.604425	0.147171	1.14693	1.16292	2.28573	0.22791
CUFF.2160.1	chr1:153866552-153875412	+	252.236	0	0	0	0	0	0	0	0	0
CUFF.2198.2	chr1:156757583-156767394	+	44.9175	0	0	0	0	0	0	0	0	0
CUFF.2198.1	chr1:156757583-156768619	+	5.75031	0	0	0	0	0	0	0	0	0
CUFF.2227.1	chr10:1407167-1443744	-	10.6697	0	0	0	0	0	0.54964	0	0	0
CUFF.2242.2	chr10:2497774-2507102	+	5.84886	0.106674	0.088029	0	0	0	0	0.154035	0	0
CUFF.2242.1	chr10:2497774-2579018	+	1.69326	0	0	0	0	0	0	0	0	0
CUFF.2261.1	chr10:4253169-4257950	+	13.4551	0	0.038987	0.025929	0	0	0.028034	0	0	0.056495
CUFF.2293.2	chr10:6411288-6417613	-	2.11033	0	0	0	0	0	0	0	0	0
CUFF.2309.1	chr10:7203676-7204330	-	3.40912	0	0	0	0	0	0	0	0	0
CUFF.2345.1	chr10:8328745-8349327	+	1.83272	0	0	0.135794	0	0.056519	0.36705	1.65242	0	0.238159
CUFF.2375.1	chr10:9776642-9783118	-	2.70507	0	0	0	0	0.026939	0.03499	0	0	0.023378
CUFF.2375.2	chr10:9780284-9783118	-	3.35596	0	0	0	0	0	0	0	0	0
CUFF.2410.1	chr10:10763984-10766535	+	7.11554	0.065824	0	0	0.011741	0	0.074307	0	0	0
CUFF.2513.2	chr10:13440440-13451037	+	8.43584	0	0	0	0.263001	0	0.286462	0	0	0.642194
CUFF.2513.1	chr10:13440440-13451742	+	4.64586	0	0	0.219886	0.177768	0	0	0.144632	0.078802	0.204777
CUFF.2606.1	chr10:16818632-16819431	-	4.48464	10.5592	0	1.04882	0	0	0	0	0	0
CUFF.2610.1	chr10:17186180-17187990	-	1.5035	0	0	0	0	0.096356	0	0	0	0.156335
CUFF.2676.1	chr10:19410076-19413236	+	20.2961	0.291888	0	0	0.247358	0	0	0	0	0
CUFF.2875.1	chr10:29606157-29615293	-	12.2537	15.2354	0	1.27931	0	0	3.22742	0	1.84651	0.476612
CUFF.2894.2	chr10:29964663-29968751	+	11.334	0.917341	0.458507	0.096297	0.339957	0.280556	2.60288	0.010557	1.6029	1.86888
CUFF.2885.1	chr10:30015899-30017197	-	4.89674	0	0	0	0	0	0	0	0	0
CUFF.2887.1	chr10:30019701-30021400	-	5.03823	0	0.455715	0.086595	0	0	0	0	0	0
CUFF.2923.1	chr10:30686785-30714459	-	2.94492	0	0	0	0	0	0	0	0	0
CUFF.2927.1	chr10:30720206-30732112	+	2.68386	0.090388	0.090796	0.026838	0.284253	0.156383	0.014509	0.070612	0.057655	0.136339
CUFF.2943.1	chr10:33301667-33359727	-	6.89279	0.839208	0	0.53576	0	0	0	0	0	0
CUFF.2994.1	chr10:34660437-34661160	+	2.39337	0	0	0	0	0	0	0	0	0
CUFF.3022.1	chr10:36055724-36057420	-	1.91075	0.927299	0	0	0.044972	0	0.071147	0.043283	0	0.046242
CUFF.3143.1	chr10:38920990-38922632	+	1.35125	0	0	0	0	0	0	0	0	0
CUFF.3143.2	chr10:38920990-38922632	+	1.63147	0	0	0	0	0	0	0	0	0
CUFF.3190.2	chr10:41261619-41624275	+	1.48973	0.068075	0	0	0.049734	0	0	0.047865	0	0
CUFF.3172.1	chr10:42129105-42214673	-	1.99382	0.32434	0	0	0	0	0	0	0	0
CUFF.3174.1	chr10:42309599-42333615	-	8.50308	5.48184	0	0	0	0	0	0	0	0
CUFF.3228.1	chr10:43701550-43702802	-	9.16233	0	0	0	0	0	0	0	0	0
CUFF.3298.1	chr10:46155207-46216064	+	1.62472	0.267421	0.111165	0.04436	0.106099	0.110777	0.143884	0.043767	0	0.142767
CUFF.3325.2	chr10:46597468-46629089	-	7.95314	0.793443	0	0	0	0	0	0.118869	0	0
CUFF.3325.1	chr10:46597468-46641108	-	3.28797	0	0	0	0	0	0	9e-06	0	0
CUFF.3325.3	chr10:46597468-46641108	-	1.73894	0	0	0	0	0	0	0	0	0
CUFF.3336.2	chr10:46929577-46943556	-	4.32719	1.03634	1.5095	1.67321	0.343195	1.11424	0.542716	0.22011	0	0.10861
CUFF.3336.1	chr10:46929577-46944625	-	1.68896	1e-06	1e-06	1e-06	1e-06	1e-06	2e-06	2e-06	0	1e-06
CUFF.3337.1	chr10:46943294-46945546	+	4.03544	0.162578	0	0	0	0	0	0	0	0
CUFF.3344.1	chr10:47130445-47132636	+	6.2577	0	0	0.384575	0	0	1.2474	0	0.275948	0
CUFF.3365.1	chr10:47937132-47940734	+	13.0089	56.2592	0	2.54591	0	0	0	0.186066	0	0
CUFF.3379.1	chr10:48376483-48548607	+	31.601	0	0	0	0	0	0	0	0	0
CUFF.3383.1	chr10:48946891-48948888	+	5.87126	0	0	0	0	0	0	0	0	0
CUFF.3383.2	chr10:48947466-48948888	+	1.15989	0	0	0	0	0	0	0	0	0
CUFF.3413.1	chr10:49917781-49995237	+	0.951571	0	0	0	0	0	0	0	0	0
CUFF.3413.2	chr10:49939128-49995237	+	0.835065	0	0	0	0	0	0	0	0	0
CUFF.3423.1	chr10:50002078-50279972	+	6.22353	0.615677	0	0	0	0	0	0	0	0
CUFF.3434.1	chr10:50859345-50860730	-	1.94364	0.303894	0	0	0.176735	0	0.0699	0.042525	0	0.272845
CUFF.3540.1	chr10:55094635-55095734	-	21.6113	5.24529	37.5082	0	12.0642	0	1.58653	0.482595	7.98358	3.89725
CUFF.3545.1	chr10:55358869-55371908	+	17.0851	0	0	0	0	0	0	0	0	0
CUFF.3545.4	chr10:55358869-55471040	+	5.02702	0	0	0	0	0	0	0	0	0
CUFF.3577.1	chr10:56522269-56584666	-	19.2737	0.975952	0	0	0	0	0.318685	0	0	0
CUFF.3577.2	chr10:56525247-56584666	-	3.80278	8e-06	0	0	0	0	0	0	0	0.306525
CUFF.3633.1	chr10:58562652-58569058	-	8.735	1.66107	5.11472	1.79276	11.4973	3.97953	6.16288	1.45133	6.42132	5.94272
CUFF.3800.2	chr10:62657408-62660785	-	0.867743	0	0	0	0	0	0	0	0	0
CUFF.3800.1	chr10:62657408-62661687	-	2.85089	0	0	0	0	0	0	0	0	0
CUFF.3801.1	chr10:62674955-62694433	+	4.03897	0	0	0	0	0	0.531694	0	0	0.471327
CUFF.3812.1	chr10:64336073-64462937	+	7.52973	0	0	0	0	0	0	0	0	0
CUFF.3829.1	chr10:64901819-64902700	+	2.95701	0	0	0	0	0	0	0	0	0
CUFF.3855.1	chr10:66359159-66371369	+	8.13703	0.094053	0	0	0	0	0	0	0	0
CUFF.3868.1	chr10:66976304-66983391	+	7.7988	7.91415	0	0.911037	0	0	0	0	0	0
CUFF.3869.2	chr10:67071903-67083409	-	13.7425	0.30518	1.42868	0	0	0	0	0	0	0
CUFF.3869.1	chr10:67071903-67085832	-	4.3639	1e-06	1e-06	0	0	0	0	0	0	0
CUFF.3899.1	chr10:68224525-68237049	+	12.6715	0	0	0	0	0	0	0	0	0
CUFF.3998.1	chr10:71259998-71400128	+	32.4483	0.210216	0	0	0	0	0	0.151577	0	0.157954
CUFF.3998.2	chr10:71343468-71400128	+	11.8611	1.2e-05	0	0	0	0	0	0.054322	0	1e-05
CUFF.4032.1	chr10:73081044-73083037	+	9.62988	0.09215	0	5.71143	0.163292	0.07957	0.129188	0	0.025667	0.330328
CUFF.4045.1	chr10:73650096-73652942	+	6.93709	10.3677	0	1.46768	0.334594	1.0181	0	0	0.791674	0.15023
CUFF.4049.1	chr10:73944126-73946621	+	17.2831	0	0	0	0	0	0	0	0.033405	0
CUFF.4051.1	chr10:73946693-73948694	+	1.59788	0	0	0	0	0	0.090347	0	0	0
CUFF.4051.2	chr10:73947359-73948694	+	3.146	0	0	0	0	0	0	0	0	0
CUFF.4072.1	chr10:74575944-74592560	+	2.08965	0	0	0	0	0	0	0	0	0
CUFF.4072.2	chr10:74575947-74699971	+	12.0992	0	0	0	0	0	0	0	0	0
CUFF.4077.1	chr10:74978829-74984728	-	111.027	0	0	0.181544	0	0	0	0	0	0.349807
CUFF.4107.1	chr10:76121242-76133541	-	14.4946	0.118098	0	0	0	0	0	0	0	0.174446
CUFF.4157.1	chr10:77083750-77084714	+	23.7974	0	0	0	0	0	0	0	0	0
CUFF.4243.1	chr10:80661720-80668338	-	4.48053	0	0	0	0	0	4.7e-05	0	0	0
CUFF.4243.2	chr10:80663344-80668338	-	14.6242	0	0	0	0	0	0.093973	0	0	0
CUFF.4306.1	chr10:82858118-82862386	+	2.92527	0.346059	0	0	0	0	0	0	0	0
CUFF.4327.1	chr10:83656652-83740151	-	3.19777	0	0	0.033876	0	0	0	0	0	0
CUFF.4328.1	chr10:83804130-83804891	-	2.61714	0.522098	0	0	0	0	0.157516	0.191654	0.15686	0
CUFF.4468.1	chr10:88418552-88427277	+	20.1403	1.35678	0	0	0	0	0	0	0	0
CUFF.4481.1	chr10:88904715-88911902	+	3.53056	1.91958	0	0	0	0	0	0	0	0
CUFF.4565.1	chr10:92236225-92250401	+	3.84551	0	0	0	0	0	0	0	0	0
CUFF.4567.1	chr10:92341122-92412418	+	6.18836	0.331652	0.218918	0.194128	0.044236	0.323191	0.349817	0.357531	0.139298	0.453976
CUFF.4575.1	chr10:92791196-92840157	-	9.29669	0	0	0.061487	0	0	0	0.020222	0	0
CUFF.4575.2	chr10:92824787-92840157	-	3.57331	0	0	0	0	0	0	0	0	0
CUFF.4610.1	chr10:94549883-94568199	+	8.76463	2.13376	0	0.205377	0	0	0.444105	0	0	0
CUFF.4617.1	chr10:94714477-94801208	+	7.37532	0.026629	0	0	0	0	0.002608	0	0	0
CUFF.4617.2	chr10:94747922-94801208	+	8.02519	0.000219	0	0	0	0	0.451815	0	0	0
CUFF.4617.3	chr10:94747925-94801208	+	11.9899	0	0	0	0	0	0	0	0	0
CUFF.4617.4	chr10:94747965-94801208	+	12.9524	0	0	0	0	0	0.125404	0	0	0
CUFF.4790.1	chr11:2762980-2765930	+	5.12236	4.38638	10.6808	4.54366	14.4008	6.45906	10.1884	4.78462	4.4499	7.08902
CUFF.4827.1	chr11:4140310-4141336	+	1.64945	0.17851	0	0	0.129657	0	0	0	0	0.356263
CUFF.4945.1	chr11:9720985-9722130	+	5.25497	0	0	0	0	0	0	0	0	0
CUFF.5177.1	chr11:20252533-20254835	-	12.1472	0	0.032989	0	0.059972	0	0	0.144312	0.094297	0
CUFF.5178.1	chr11:20257810-20258799	+	2.72737	0.531494	0	0	0	0	0	0	0	0
CUFF.5234.1	chr11:22202978-22273868	+	2.66215	0	0	0	0	0	0	0	0	0
CUFF.5234.2	chr11:22207517-22349853	+	3.5783	0	0	0	0	0	0	0	0	0.145198
CUFF.5234.3	chr11:22255711-22267652	+	1.61123	0	0	0	0	0	0	0	0	0
CUFF.5339.1	chr11:22819699-22824044	-	7.41659	0	0	0	0	0	0.962765	0.976185	0	0.176359
CUFF.5271.1	chr11:24394339-24398893	-	1.33397	0	0	0	0	0	0	0.049738	0	0
CUFF.5337.1	chr11:27070104-27081014	+	21.5377	0	0	0	0	0	0	0	0	0
CUFF.5341.1	chr11:27181706-27187130	+	4.34321	0	0	0	0	0	0	0	0	0
CUFF.5379.1	chr11:28719428-28756142	-	114.618	0	0	0	0	0	0	0	0	0
CUFF.5382.1	chr11:28983538-28984996	+	79.6408	0	0	0	0	0	0	0	0	0
CUFF.5391.1	chr11:29140957-29143756	-	2.4037	1.47456	0	0	0	0	0	0	0	0
CUFF.5472.1	chr11:31798635-32034711	-	8.15242	0	0	0	0	0	0	0	0	0.053537
CUFF.5472.2	chr11:31798635-32123635	-	8.26619	0	0	0	0	0	0	0	0	2.1e-05
CUFF.5491.1	chr11:35122497-35123594	+	3.57353	0	0	0	0	0	0	0	0	0
CUFF.5646.2	chr11:40960836-40962489	-	3.26485	0	0	0	0	0	0	0	0	0
CUFF.5646.1	chr11:40960836-40981583	-	0.865539	0	0	0	0	0	0	0	0	0
CUFF.5650.1	chr11:41202414-41210655	+	2.23778	0	0	0	0	0	0	0	0	0.388937
CUFF.5658.1	chr11:41732511-41733274	-	6.8342	0	0	0	0	0	0	0	0	0
CUFF.5661.1	chr11:41876849-41880445	-	8.13302	0	0	0	0	0	0	0	0	0
CUFF.5661.2	chr11:41876849-41880445	-	16.8171	0	0	0	0	0	0	0	0	0
CUFF.5661.3	chr11:41879030-41880445	-	12.49	0	0	0	0	0	0	0	0	0
CUFF.5670.2	chr11:42398284-42399701	+	19.1913	0	0	0	0	0	0	0	0	0
CUFF.5670.1	chr11:42398284-42401466	+	4.2283	0	0	0	0	0	0	0	0	0
CUFF.5670.3	chr11:42400158-42401466	+	4.34112	0	0	0	0	0	0	0	0	0
CUFF.5688.1	chr11:43053178-43055909	-	2.36494	0	0	0	0	0	0	0	0	0
CUFF.5792.1	chr11:48847060-48847842	+	19.7782	0	0	0	0	0	0	0	0	0
CUFF.5802.1	chr11:49277614-49282460	-	2.87514	2.90233	1.35554	1.26214	2.78497	1.23073	2.84621	2.46684	3.45048	2.06734
CUFF.5836.1	chr11:60033290-60034414	-	3.88157	0	0	0	0	0	0	0	0	0
CUFF.5858.1	chr11:60639996-60641569	-	12.2493	0	0	0	0	0	0	0	0	0
CUFF.5874.1	chr11:60891632-60917172	+	4.84996	0	0	0	0	0	0.095046	0	0	0
CUFF.5893.1	chr11:62014643-62083834	-	2.90978	0.313989	0	0.066889	0.045714	0	0	0	0.071906	0
CUFF.5895.1	chr11:62079089-62083454	-	19.0527	0	0	0	0	0	0	0	0	0
CUFF.6015.3	chr11:69128763-69135839	+	2.40909	4.81872	2.80069	0.712193	0.037439	0	0	0	3.65044	0.116539
CUFF.6083.1	chr11:71396660-71399872	+	6.51947	0	0	0	0	0	0	0	0	0
CUFF.6257.1	chr11:75792682-75808956	+	5.65823	0.000335	0	0	0	0	0	0	0	0
CUFF.6257.2	chr11:75792682-75935297	+	2.74642	0.747636	0.817238	0	0	0	0	0	0	0.136066
CUFF.6265.1	chr11:76285388-76319271	+	14.7844	1.05279	0	0	0	0	0	0	0	0
CUFF.6284.1	chr11:77218021-77459715	-	5.45343	0.26495	0	0.224252	0	0	0	0	0	0
CUFF.6284.2	chr11:77339443-77459715	-	27.6596	0	0	0.000123	0	0	0	0	0	0
CUFF.6294.1	chr11:77841440-77870699	-	89.2491	4.23486	0	0.331934	0	0.907867	0	0	0	0
CUFF.6290.2	chr11:77931181-77934989	-	16.768	0	0	0	0	0	0	0	0	0
CUFF.6290.1	chr11:77931181-77945831	-	15.2312	0	0	0	0	0	0	0	0	0
CUFF.6366.1	chr11:83370629-83371295	-	19.8897	0	0	0	0	0	0	0	0	0
CUFF.6370.3	chr11:83708020-83761349	+	5.68945	0	0	0	0	0	0	0	0	0
CUFF.6445.1	chr11:90430736-90434254	+	8.29227	2.94599	0	0.246057	0	0	0	0	0	0
CUFF.6445.2	chr11:90431321-90434254	+	6.96019	1.10678	0	9e-06	0	0	0	0	0	0
CUFF.6446.1	chr11:90779099-90780386	+	8.21403	0	0	0	0	0	0	0	0	0
CUFF.6523.1	chr11:95734870-95761538	-	1.8284	1.11641	0.083452	0.444011	0	0.462002	0.600077	0.073013	0.119432	0.075238
CUFF.6593.2	chr11:98158643-98161010	-	4.22181	1.4744	0.7489	0.249026	2e-06	0.414602	2e-06	1.14665	4.56771	0.609967
CUFF.6593.1	chr11:98158643-98161013	-	4.59517	4e-06	5e-06	8e-06	0.304263	3e-06	1.28317	3e-06	5e-06	4e-06
CUFF.6704.1	chr11:101556659-101560356	+	1.25272	0	0	0	0	0	0	0	0	0
CUFF.6704.2	chr11:101559482-101560356	+	7.80777	0	0	0	0	0	0	0	0	0
CUFF.6861.1	chr11:106465962-106467550	-	2.02481	0.994213	1.74865	1.07352	4.76932	1.04255	1.93447	2.53025	5.77271	5.73613
CUFF.6949.1	chr12:13018981-13020415	-	2.19682	1.56116	1.09136	0	0	0	0	0	0	0
CUFF.6976.1	chr12:13897417-13906581	+	10.9715	0	0	0	0	0	0	0	0	0
CUFF.7012.1	chr12:15716516-15719005	-	4.80292	0.049803	0.136105	0	0.035345	0	0.027963	0	0	0.018785
CUFF.7011.2	chr12:15834333-15852303	+	15.27	0	0	0	0	0	0	0	0	0
CUFF.7011.1	chr12:15834333-15886076	+	2.43119	0.496004	0	0	0	0	0	0	0	0
CUFF.7014.3	chr12:15887863-15897398	+	4.70685	2.03139	1.07595	0.286234	0	0	0	0	0	0
CUFF.7014.1	chr12:15887863-15905068	+	0.562205	0.103747	0	0	0	0.017497	0	0	0	0.037654
CUFF.7014.2	chr12:15887863-15905068	+	1.12427	0.104279	0	0	0	0.017569	0	0	0	0.037805
CUFF.7074.1	chr12:18958968-18962686	-	5.66879	3.66274	0	0	0	0	0	0.305488	0	0
CUFF.7105.1	chr12:19574414-19577640	-	13.1428	0.634433	14.6188	1.98419	4.88825	2.31234	0.858119	0.522048	5.15228	1.12159
CUFF.7108.1	chr12:19621192-19649824	+	1.95363	0.396792	3.77822	0.886864	1.11157	0.12304	1.2785	0.097224	0.318305	1.558
CUFF.7159.1	chr12:21733937-21745245	+	5.68696	7e-06	0	0	0	0	0	0	0	0
CUFF.7159.2	chr12:21737167-21746618	+	4.45421	0.78801	0.05771	0	0.052464	0	0	0	0	0.053466
CUFF.7178.1	chr12:22394740-22428099	+	1.87888	0	0	0	0	0.205406	0	3e-05	9.5e-05	0
CUFF.7178.2	chr12:22395730-22428099	+	5.09353	0	3.81939	1.4e-05	1.4e-05	0.000358	0	6.5469	0.836092	1.3e-05
CUFF.7180.1	chr12:22398226-22399466	+	6.93578	0	0	0	0	0	0	0	0	0
CUFF.7178.3	chr12:22416054-22428099	+	4.288	0	0.343302	0.122742	0.167817	0	0	3.03385	0	0.164878
CUFF.7270.1	chr12:29738573-29777676	-	3.41594	0.646026	0.075404	1.30388	1.78246	0.08349	1.08442	1.05556	1.4026	2.05676
CUFF.7382.1	chr12:35519163-35587212	-	3.4165	10.8214	0	1.68234	0	0	0.259848	0	0.518508	0
CUFF.7528.1	chr12:54224519-54229429	+	3.14846	0.216475	0	0	0	0	0	0	0	0
CUFF.7552.2	chr12:55789596-55858484	+	2.83233	0.098471	0.080799	0.322421	0.440777	0.984089	0.929598	0.42415	1.15627	1.75316
CUFF.7564.1	chr12:56622119-56623635	+	69.2903	0	0	0	0	0	0	0	0	0
CUFF.7564.2	chr12:56622120-56626091	+	53.0131	0	0	0	0	0	0	0	0	0
CUFF.7582.1	chr12:58860669-58928755	+	61.4811	0	0	0	0	0	0	0	0	0
CUFF.7588.1	chr12:60492249-60575392	+	11.041	0	0	0	0	0	0.504946	0	0	0
CUFF.7664.1	chr12:67793452-67936141	-	5.34588	0	0.034248	0	0.031131	0	0	0.029964	0.048951	0
CUFF.7685.1	chr12:68033873-68060258	-	44.4739	0.072298	0.170617	0	0	0	0	0	0	0
CUFF.7685.2	chr12:68043958-68060258	-	45.1041	0	0	0	0	0	0	0	0	0
CUFF.7776.1	chr12:76026462-76028128	+	3.8465	0	0	0	0	0	0	0	0.177113	0
CUFF.7771.3	chr12:76073979-76144188	+	7.28822	0.54183	6.40014	0.678034	4.14489	1.0661	1.88702	0.173438	10.7055	1.31335
CUFF.7808.1	chr12:77382417-77427103	+	10.633	0	0	0	0	0	0	0	0	0
CUFF.7922.1	chr12:83472911-83493877	+	5.23002	11.1879	0	1.72236	0	0	0	0	0	0
CUFF.7925.1	chr12:83552527-83554495	-	7.3048	0.17876	0	0	0	0	0	0	0	0
CUFF.7924.1	chr12:83674248-83703470	+	11.8018	0.81086	0	0	0	0	0	0	0	0
CUFF.7927.1	chr12:83715895-83726563	+	0.603566	0.08427	0	0	0	0	0	0	0	0
CUFF.7930.1	chr12:83817758-83918824	+	6.7826	0.774775	0	0	0	0	0	0	0	0
CUFF.7938.1	chr12:85069136-85329481	-	6.68471	0	0	0	0	0	0	0	0	0
CUFF.7938.2	chr12:85124418-85329481	-	3.38083	0	0	0	0	0	0	0	0	0
CUFF.7941.1	chr12:85360592-85362368	+	6.79262	0	0	0	0	0	0	0	0	0
CUFF.7942.1	chr12:85360592-85362929	-	1.57241	0	0	0	0	0	0	0	0	0
CUFF.8064.1	chr13:4338452-4340035	-	5.2558	0	0	0	0	0	0	0	0	0
CUFF.8064.2	chr13:4339387-4340035	-	4.43695	0	0	0	0	0	0	0	0	0
CUFF.8081.1	chr13:5734045-5735603	+	7.76802	0.547439	0	0.115991	0.079269	0	0.125409	0	0.062333	0
CUFF.8090.1	chr13:7007262-7011166	-	0.693131	0.07568	0	0.019573	0.026748	0.032586	0	0	0.021021	0
CUFF.8128.1	chr13:8884141-8885328	+	1.60464	0	0	0	0	0	0	0	0	0
CUFF.8156.1	chr13:10551475-10575682	+	1.25276	2.75718	0	0.322421	0	0.089463	0.232399	0	0	0.073048
CUFF.8159.1	chr13:10709065-10716114	+	5.09369	0.027488	0.0215	0.014299	0.029312	0	0.03092	0.009405	0	0
CUFF.8208.1	chr13:11211289-11225842	+	10.9657	3.83668	0	0	0.435611	1.8e-05	0.398987	0	0.360388	4.39346
CUFF.8208.2	chr13:11211289-11225842	+	6.76637	0.953711	0.390441	1.03015	0.000614	0.30084	0.347215	0.262888	0.001108	4.94637
CUFF.8208.3	chr13:11211291-11225842	+	12.3644	2.53686	0.010626	0.036761	2.13541	0.280679	0.334729	0.000319	0.000833	1.51735
CUFF.8244.3	chr13:13022092-13037355	-	2.80663	0	1.98836	0.211584	0.723127	0.088063	0	0.069586	0.341441	0.288003
CUFF.8254.2	chr13:13242789-13246838	-	2.32798	0	0	4e-06	0	0	4e-06	2e-06	3e-06	3e-06
CUFF.8254.1	chr13:13242789-13247772	-	4.45424	0	0	0.815026	0	0	0.440598	0.268044	0.44099	0.688098
CUFF.8280.1	chr13:14477479-14589615	+	22.0488	0	0	0	0	0	0	0	0	0
CUFF.8306.2	chr13:16997381-16999248	+	3.48931	0	0	0	0	0	0	0	0	0
CUFF.8311.1	chr13:17033003-17034178	-	6.14585	0	0.080952	0	0	0	0	0	0	0
CUFF.8387.2	chr13:20226365-20227921	-	2.13432	0.010761	0	0	0	0	0	0	0	0
CUFF.8387.3	chr13:20226365-20228398	-	4.26511	0	0	0	0	0	0	0	0	0
CUFF.8387.1	chr13:20226365-20228426	-	3.52633	0.085222	0	0	0	0	0	0	0	0
CUFF.8391.1	chr13:20247491-20248382	-	20.0133	12.5681	0.008704	3.43069	2.63916	0.007094	1.57253	3.75136	1.83282	1.14119
CUFF.8391.2	chr13:20247491-20248382	-	38.3111	2.31153	2.00872	0.32986	0.559889	1.4037	1.566	2.58518	1.82077	0.001316
CUFF.8394.2	chr13:20461137-20507230	-	11.8219	35.3882	0	4.62368	0	0	0	0	0.769037	0
CUFF.8420.1	chr13:22924284-22929400	+	5.0646	0	0	0	0	0	0	0	0	0
CUFF.8601.1	chr13:30735536-31040459	-	2.70937	0	0	0	0	0	0.270359	0	0	0
CUFF.8601.2	chr13:30767356-31040459	-	1.31005	0	0	0	0	0	0	0	0	0
CUFF.8601.3	chr13:30769952-31040459	-	11.3695	0	0	0	0	0	8e-06	0	0	0
CUFF.8623.1	chr13:32753342-32792492	+	69.5712	0	0	0	0	0.143422	0	0	0	0
CUFF.8625.1	chr13:32801840-32805681	-	22.302	0	0	0	0	0	0	0	0	0
CUFF.8649.1	chr13:33683321-33685568	-	2.67291	0	0	0	0	0	0	0	0.038415	0
CUFF.8655.1	chr13:33921274-33923246	-	1.7479	0	0	0	0	0.030245	0	0	0	0
CUFF.8732.1	chr13:38179486-38180973	+	18.9673	0.834418	0	0	0	0	0	0	0	0
CUFF.8782.1	chr13:39111086-39116807	+	3.47726	0.131825	0	0	0	0	0	0	0	0
CUFF.8804.1	chr13:42714351-42719730	-	1.46818	0	0	0	0	0	0	0	0	0
CUFF.8804.2	chr13:42719236-42719728	-	5.06317	0	0	0	0.170327	0	0	0	0	0
CUFF.9034.1	chr13:56552055-56554943	-	2.6055	1.09837	0	0	0	0	0	0	0	0
CUFF.9069.1	chr13:57979710-57997296	+	1.39226	0	0	0	0	0	0	0	0	0
CUFF.9074.1	chr13:58050427-58089921	+	11.6926	13.26	0	0	0	0	0	0	0	0
CUFF.9112.1	chr13:60596746-60602609	+	6.7286	0	0	0	0	0	0	0	0	0
CUFF.9118.1	chr13:60958828-60960986	-	9.66428	0	0	0	0	0	0	0	0	0
CUFF.9245.1	chr13:65328029-65329456	+	9.9062	3.37007	2.43395	0.249039	0.170327	0.621911	0.538518	0.327615	0.268689	1.67743
CUFF.9392.2	chr13:70871758-70876641	-	18.5206	0	1.21837	0	0	0	1.16813	0.177662	0	0.326263
CUFF.9420.1	chr13:72268226-72268949	+	2.91133	0	0	0	0	0	0	0	0	0
CUFF.9429.1	chr13:72931706-72935549	+	1.98597	2.2459	3.06109	0.514318	0.820085	0.356772	0.417058	0.535637	0.690776	0.245531
CUFF.9516.2	chr13:76491008-76498834	-	2.6857	0	0	0	0	0	0	0	0	0
CUFF.9516.1	chr13:76491008-76499440	-	1.65331	0	0	0	0	0	0	0	0	0
CUFF.9516.3	chr13:76491008-76499440	-	6.21716	0	0	0	0	0	0	0	0	0.085403
CUFF.9582.1	chr13:78104574-78105513	+	21.922	90.7132	433.608	55.3587	163.445	56.798	108.571	171.055	213.229	718.405
CUFF.9599.1	chr13:78724031-78729040	-	14.9147	0.080019	0.042448	0.141154	0	0	0.122092	0.018569	0	0.099952
CUFF.9600.1	chr13:78730681-78733363	+	7.35004	4.79786	0.217493	0.578593	0.59333	0	2.97146	0.380575	0.155738	0.668655
CUFF.9636.1	chr13:79973982-79976053	+	3.14158	0.370946	0	0	0	0	0	0	0	0
CUFF.9636.2	chr13:79973982-79976053	+	2.61099	3e-06	0	0	0	0	0	0	0	0
CUFF.9719.1	chr13:83913116-83920391	+	20.4155	0	0	0	0	0	0	0	0	0
CUFF.9794.1	chr14:3421211-3422770	+	4.88201	0	0	0	0	0	0	0	0	0.207499
CUFF.9866.1	chr14:5769042-5787697	+	3.63405	0	0	0	0	0	0	0	0	0
CUFF.9867.1	chr14:5830374-5856928	+	2.54221	0	0	0	0	0	0	0	0	0
CUFF.9924.2	chr14:12290408-12291848	+	12.5221	0	0	0	0	0	0	0	0	0
CUFF.9924.1	chr14:12290408-12386655	+	3.93216	0.090676	0	0	0.096385	0	0	0.046391	0	0.017109
CUFF.9933.1	chr14:12555915-12606777	-	8.92933	0	0	0	0	0	0.070413	0	0	0
CUFF.9933.2	chr14:12600966-12606777	-	1.04165	0	0	0	0	0	0	0	0	0
CUFF.9941.1	chr14:12769323-12795159	-	19.8834	6.11205	0	0.000911	0	0	0	0.204643	0	0.0541
CUFF.9941.2	chr14:12769323-12795159	-	31.2647	25.4338	0	3.09079	0	0	0	3e-05	0	3.5e-05
CUFF.9972.1	chr14:16838327-16839271	+	6.10043	0	0	0	0	0	0	0	0	0
CUFF.10031.1	chr14:18857868-18950808	+	5.57679	0	0	0	0	0	0	0	0	0
CUFF.10115.1	chr14:26045757-26099805	+	12.2895	0	2.43105	1.38584	0.105274	0.384533	0.665941	2.02567	0.994913	2.62512
CUFF.10115.2	chr14:26085568-26099805	+	3.82296	0	0	0	0	0	0	1e-06	0	0
CUFF.10176.1	chr14:31725940-31735090	-	14.5738	0	0	0	0	0	0	0	0	0
CUFF.10216.2	chr14:33535403-33536532	+	2.05491	0.191248	0	0	0	0	0	0	0	0
CUFF.10206.1	chr14:33742702-33790804	-	4.35143	0	0	0.073295	0	0	0.396232	0	0.551612	0
CUFF.10260.1	chr14:37513865-37522142	-	6.02607	0.190828	0	0	0.022675	0	0	0	0	0.023954
CUFF.10273.1	chr14:38717780-38723591	-	23.9148	56.086	4.53926	8.05048	6.88917	4.60718	1.63203	1.98573	3.27251	10.9867
CUFF.10293.1	chr14:39466200-39468703	-	3.80871	0.901895	0	0.219009	0	0	0	0	0	0
CUFF.10312.1	chr14:39726636-39727809	+	4.95996	10.3325	0	22.9944	3.76667	0	0.70032	5.32562	0.349926	1.70561
CUFF.10380.1	chr14:45875714-45876589	-	3.05078	1.33348	0	0.326319	0.22325	11.6802	0.352814	2.14639	0	0
CUFF.10399.1	chr14:48258893-48312544	+	18.2905	1.2761	0	0.361066	0.060876	0	0.096299	0.058585	0.095789	0
CUFF.10401.1	chr14:48664306-48695661	+	3.40617	0	0	0	0	0	0	0	0	0
CUFF.10401.3	chr14:48694547-48710075	+	2.22512	0.061059	0	0	0	0	0	0	0	0
CUFF.10411.1	chr14:49408186-49412786	+	33.0237	0.055278	0	0.058582	0	0	0.190015	2.46609	0	0.16564
CUFF.10429.1	chr14:49624858-49697579	-	27.2954	1.10145	0	0.086103	0.044126	0.017918	0.046547	0.014159	0.023119	0
CUFF.10476.2	chr14:52661103-52687835	-	80.0703	0	0.359597	0.173933	0.237761	0	0	0	0	0.060079
CUFF.10527.2	chr14:57365279-57464693	-	11.0951	0.09076	0	0.063064	0	0	0	0	0	0
CUFF.10539.2	chr14:58967940-58977000	+	3.26762	3.71767	0	0	0	0	0	0	0	0
CUFF.10548.1	chr14:59621525-59622763	+	10.6671	0	0	0	0	0	0	0	0	0
CUFF.10566.1	chr14:59774380-59969748	-	12.5722	1.78995	0.859876	1.14376	0.783201	0	0	0.376158	0	0
CUFF.10566.2	chr14:59961852-59969745	-	4.26616	0	0	0	0	0	0	0	0	0
CUFF.10566.3	chr14:59961852-59970457	-	7.22803	0	0	0	0	0	0	0	0	0
CUFF.10584.2	chr14:60731157-60881692	-	4.9538	0	0	0	0	0	0	0	0	0
CUFF.10584.3	chr14:60860154-60881694	-	36.9977	0	0	0	0	0	0	0	0	0
CUFF.10613.1	chr14:63304070-63309224	-	30.2097	0.105751	0	0	0.025189	0	0.119564	0	0.118807	0
CUFF.10758.1	chr14:70455458-70456478	+	20.043	0	0	0	0	0	0	0	0	0
CUFF.10763.1	chr14:71127467-71134885	-	1.44848	0	0	0	0	0	0	0	0	0
CUFF.10763.2	chr14:71127467-71134885	-	2.25888	0	0	0	0	0	0	0	0	0
CUFF.10763.3	chr14:71127467-71134885	-	2.3254	0	0	0	0	0	0	0	0	0
CUFF.10763.4	chr14:71132320-71134908	-	5.87628	0	0	0	0	0	0	0	0	0
CUFF.10815.1	chr14:73073713-73077707	+	8.12262	0.103611	0	0	0	0	0	0	0	0
CUFF.10817.1	chr14:73112024-73113674	+	6.79901	0.371762	0.044767	0.029773	0.020345	0.446105	0	0.019584	0	0
CUFF.10818.1	chr14:73148014-73148902	+	2.04237	0	0	0	0	0.170102	0	0	0	0
CUFF.10819.1	chr14:73524652-73527713	-	1.98599	0	0	0	0	0	0	0	0	0
CUFF.10823.1	chr14:74060374-74095830	+	4.87499	0.186107	0	0	0	0	0	0	0	0
CUFF.10852.2	chr14:75673136-75676846	+	13.2498	16.7703	2.62692	6.29071	3.0964	4.50189	4.80939	5.05161	3.35511	15.8636
CUFF.10906.1	chr14:83077483-83081365	-	2.33268	0.04149	0.043282	0.014392	0.029592	0	0.109393	0	0.057953	0.034561
CUFF.10906.2	chr14:83077483-83081365	-	2.85196	0.041958	0.043761	0.014553	0.168391	0	0.10967	0	0.004153	0.133326
CUFF.11030.1	chr15:10164571-10303738	-	3.57805	0.654492	0	3.2e-05	0	0	0.836107	0	0	1.4e-05
CUFF.11030.2	chr15:10236141-10303738	-	6.70928	0.001576	0	0.261572	0	0	1.37853	0	0	0.635465
CUFF.11034.1	chr15:10622116-10711870	-	13.6075	0.229844	0	0.164749	0	0	0.623441	0	0	0.057117
CUFF.11041.1	chr15:14022550-14042552	-	23.1274	1.94773	0	0	0	0	0	0	0	0
CUFF.11042.1	chr15:14068473-14068985	-	15.8695	0	0	0	0	0	0	0	0	0
CUFF.11176.1	chr15:23109498-23110850	-	2.93349	0.205081	0	0.112231	0	0	0	0	0	0
CUFF.11227.1	chr15:26495560-26496725	-	3.67145	0	0	0	0	0	0	0	0	0
CUFF.11228.1	chr15:26543514-26544608	-	21.9376	0	0	0	0	0	0	0	0	0
CUFF.11230.1	chr15:26662611-26671078	-	1.88095	0.531494	0	0	0	0	0	0	0	0
CUFF.11233.1	chr15:26948327-26949077	-	5.25277	10.7156	0	0.779937	0	0	0	0	0	0
CUFF.11275.1	chr15:28887135-28888014	+	4.20706	0	0	0	0	0	0	0	0	0
CUFF.11384.1	chr15:30598474-30602658	+	6.28132	0	0	0	0	0	0	0	0	0
CUFF.11385.1	chr15:30677625-30685780	-	3.03498	0.414708	0	0	0	0	0	0	0	0
CUFF.11427.1	chr15:33040061-33061971	-	4.64706	0.217774	0	0.115331	0	0	0	0.03793	0	5.22151
CUFF.11433.1	chr15:33173061-33208093	-	6.87189	0	0	0	0	0	0	0	0	0.32088
CUFF.11457.1	chr15:34142196-34143928	+	8.57033	0	0	0	0	0	0	0	0	0
CUFF.11476.1	chr15:34484238-34488604	-	9.41726	0	0	0	0	0	0	0.268048	0	0.229367
CUFF.11523.1	chr15:37493710-37539416	-	2.67942	3.20148	0	0	0	0	0	0	0	0
CUFF.11566.1	chr15:39313229-39352043	-	2.39996	0	0	0	0	0	0	0	0	0
CUFF.11660.2	chr15:43502295-43506471	-	3.01774	0	0.024967	0	0.045387	0.055289	0.143626	0	0	0
CUFF.11686.1	chr15:44248234-44250122	-	2.78033	4.58615	0	0.305427	0	0	0	0	0	0
CUFF.11712.1	chr15:44755330-44760193	+	9.34974	0.105283	0	0	0.238216	0.030546	0.039674	0	0	0.052824
CUFF.11770.1	chr15:46353298-46358211	+	1.7064	1.04578	0.316253	0.368078	0.754622	0.087541	0.795928	0.276693	0.169529	1.64352
CUFF.11805.1	chr15:47405315-47409060	+	1.82453	0.25607	0.033718	0.04485	0	0	0.096983	0	0	0.064127
CUFF.11889.1	chr15:53152867-53154047	+	2.76618	1.20652	15.415	1.01506	15.5394	2.76017	0.73165	1.82495	2.32788	4.41579
CUFF.12007.3	chr15:58669557-58671966	-	1.63689	0	0	0	0	0	0	0	0	0
CUFF.12007.1	chr15:58669557-58672288	-	1.06071	0.000183	0	0	0	0	0	0	0	0
CUFF.12007.2	chr15:58669557-58673432	-	0.545462	0.045852	0	0	0	0	0	0	0	0
CUFF.12010.1	chr15:58775078-58778841	-	7.40061	1.4031	0	0.071361	0	0	0	0	0	0
CUFF.12012.1	chr15:58779532-58788834	+	0.930233	0	0	0	0	0	0.075817	0	0	0
CUFF.12012.2	chr15:58779560-58788834	+	0.976994	0	0	0	0	0	3e-06	0	0	0
CUFF.12036.1	chr15:59074695-59091592	-	2.09353	0.17851	0.213946	0	0.172877	0.236887	0.068374	0.041596	0.135954	0.155865
CUFF.12056.2	chr15:60081922-60095389	+	9.33681	0	0	0	0	0	0	0	0	0
CUFF.12056.1	chr15:60081922-60409211	+	9.83691	0	0	0	0	0	0	0	0	0
CUFF.12054.1	chr15:60493445-60524638	+	1.12881	3.23986	0	0.53074	0	0	0	0	0	0
CUFF.12065.1	chr15:61204777-61394405	-	1.56038	0.11429	0	0	0	0	0	0	0	0.085566
CUFF.12065.2	chr15:61204777-61394405	-	2.94511	0.000241	0	0	0	0	0	0	0	0.000193
CUFF.12065.3	chr15:61286747-61394405	-	4.72484	0.09518	0	0	0	0	0	0	0	0
CUFF.12077.1	chr15:62308011-62328417	-	3.41608	0	0	0	0	0	0	0	0	0
CUFF.12078.1	chr15:62684231-62690107	-	6.18613	4.46956	0	0	1.45213	0	0.763928	0	0	0
CUFF.12104.3	chr15:63803049-63806287	-	1.8003	0.213347	0	0	0	0.292404	0	0	0	0
CUFF.12135.2	chr15:65267106-65295765	+	6.49966	0	0	0	0	0	0	0	0	0
CUFF.12193.1	chr15:66702461-66706254	+	7.27309	0.266683	0	0	0	0	0	0	0	0
CUFF.12193.2	chr15:66702469-66706254	+	4.91258	0.270373	0	0	0	0	0	0	0	0
CUFF.12206.1	chr15:67197061-67210512	-	5.04939	0	0	0	0	0	0	0	0	8.2e-05
CUFF.12206.2	chr15:67197061-67210512	-	1.77725	0	0	0	0	0	0	0	0	0.030857
CUFF.12206.3	chr15:67201865-67210512	-	2.82375	0	0	0	0	0	0	0	0.156297	0
CUFF.12219.1	chr15:68380038-68405023	+	19.2266	0.162981	0	0.087909	0	0.073177	0	0	0.094541	0.121369
CUFF.12222.1	chr15:68698427-68834872	+	2.73808	0	0	0	0	0	0	0	0	0
CUFF.12244.1	chr15:72740873-72744846	-	2.61397	0	0	0	0	0	0.062348	0	0	0
CUFF.12263.1	chr15:74114012-74128356	-	16.6914	0	0	0	0	0	0	0	0	0
CUFF.12280.1	chr15:74475517-74478116	-	1.54693	1.27654	0	0.061607	0	0	0	0	0	0
CUFF.12288.1	chr15:74489680-74491814	-	9.09712	6.16905	0	0	0	0	0	0	0	0
CUFF.12307.1	chr15:75018676-75024256	+	1.64906	0.100464	0	0	0	0	0	0	0	0
CUFF.12322.2	chr15:76377249-76380178	-	5.4799	2.53491	0	1.10018	0	0	0	0	0	0
CUFF.12322.1	chr15:76377249-76380179	-	20.4546	9.87848	0	0.891309	0	0	0	0	0	0
CUFF.12324.1	chr15:76650302-76651757	+	4.8034	287.048	0	14.6739	0	0	0	0	0	0
CUFF.12324.2	chr15:76650302-76651757	+	6.27552	6.71682	0	0.111677	0	0	0	0	0	0
CUFF.12439.1	chr15:82276823-82277696	-	2.13492	4.83452	0	0	0	0	0	0	0	0
CUFF.12566.1	chr16:2215939-2221672	+	2.81648	0	0	0	0	0	0	0	0	0
CUFF.12621.1	chr16:3757320-3762574	-	6.09999	0	0	0	0	0	0	0	0	0
CUFF.12680.1	chr16:11583759-11663767	-	64.2869	0	0	0	0	0.075123	0	0	0	0
CUFF.12698.1	chr16:13785243-13945658	+	11.5965	0.841655	0.45546	0.046602	0.191079	0.038792	0	0.061306	0.200306	0.033268
CUFF.12717.2	chr16:18621398-18624490	-	3.10224	0.844393	0	0.082542	0	0	0	0	0	0
CUFF.12758.1	chr16:20506707-20514912	-	52.6267	0.024879	0.004817	0	0.02189	0.021334	0.05542	0.004214	0	0.047054
CUFF.12754.1	chr16:20524634-20591285	-	1.81218	0	0	0.078093	0	0	0	0	0	0
CUFF.12754.2	chr16:20590119-20591334	-	3.35321	0	0	0	0	0.07353	0	0	0	0
CUFF.12918.2	chr16:32368779-32369991	+	12.0557	0	0	0	0	0	0	0	0	0
CUFF.12918.1	chr16:32368779-32378284	+	1.65456	0.092411	0	0	0	0	0	0	0	0
CUFF.12923.1	chr16:32378340-32381024	+	1.36707	0.082489	0	0.023293	0	0	0	0	0	1e-06
CUFF.12923.2	chr16:32379293-32381024	+	1.86745	0.040051	0	0	0	0	0	0	0	0.022723
CUFF.12928.2	chr16:32555012-32558895	+	1.58516	0	0	0	0	0	0.069457	0	0.207165	0.045201
CUFF.12982.1	chr16:38148790-38152943	-	2.07545	0	26.49	0.117844	10.7515	2.35429	0.445944	0.11627	0.443315	0.041639
CUFF.13038.1	chr16:40065851-40106647	+	12.2575	0	0	0	0	0	0	0	0	0
CUFF.13038.2	chr16:40065852-40106647	+	11.1718	0	0	0	0	0	0	0	0	0
CUFF.13362.1	chr16:58877325-58878385	+	9.85672	0	0	0.355668	0	0	0	0	0	0
CUFF.13375.1	chr16:59780919-59782991	-	39.7406	0	0	0	0	0	0	0	0	0
CUFF.13381.2	chr16:59836935-59840212	+	2.57881	0	0	0	0	0	0	0	0	0.115139
CUFF.13400.1	chr16:60170706-60550020	-	5.98977	0.500152	0	0	0	0.252379	0	0	0	0.179474
CUFF.13398.1	chr16:60691135-60692157	+	2.12884	0	0	0	0	0	0	0	0	0
CUFF.13414.1	chr16:60868293-60883064	-	3.85928	0	0	0	0	0	0	0	0	0
CUFF.13489.1	chr16:62857128-62857679	-	38.9528	0	0	0	0	0	0	0	0	0
CUFF.13523.1	chr16:64084488-64093603	-	4.93245	0	0	0	0	0	0	0	0	0
CUFF.13549.1	chr16:64595312-64596611	-	3.41241	0	0	0	0	0	0.091098	0.055421	0	0
CUFF.13606.1	chr16:66674671-66676628	-	4.43974	0	0	0	0	0	0	0	0	0
CUFF.13616.1	chr16:66804320-66805567	+	128.094	6e-06	0	0.159428	0	0	0	0	0	0.133858
CUFF.13616.2	chr16:66804320-66827062	+	15.0584	0.456181	0	1e-06	0	0	0	0	0	0.278342
CUFF.13609.1	chr16:67171858-67173121	+	2.18972	0	0	0	0.086809	0	0	0	0	0
CUFF.13636.1	chr16:67977940-68039999	+	12.576	0	0	0	0	0	0	0	0	0
CUFF.13701.1	chr16:70501865-70511810	+	7.11773	14.156	0	0.919884	0	0	0	0	0	0
CUFF.13716.1	chr16:71216865-71217542	+	7.69136	0	0	0	0	0	0	0	0	0
CUFF.13752.1	chr16:71699336-71700599	-	16.7457	0	0	0	0	0	0	0	0	0
CUFF.13752.2	chr16:71699336-71701850	-	28.729	0	0	0	0	0	0	0	0	0
CUFF.13785.1	chr16:72969534-72970663	+	8.44769	0	0	0	0	0	0	0	0	0
CUFF.13837.1	chr16:74545227-74547107	+	5.09979	0.238698	0	0.071263	0	0	0.038524	0	0.114838	5.21079
CUFF.13839.1	chr16:74735260-74742122	+	0.778483	0	0	0	0	0	0	0	0	0.028812
CUFF.13858.1	chr16:74939763-74941969	-	2.90461	0	0	0	0	0	0	0	0	0
CUFF.13873.1	chr16:75419049-75420707	-	7.13483	64.3943	0	7.01274	0.143783	0	0.227464	0.092254	0.075391	0.098215
CUFF.13892.1	chr16:76926151-76932748	-	9.40953	0	0	0	1.13771	0	0	0.013038	0	0.028941
CUFF.13942.1	chr16:79161383-79171559	-	25.949	0	0	0	0	0	0	0	0	0
CUFF.13942.2	chr16:79167336-79171559	-	8.3439	0	0	0	0	0	0	0	0	0
CUFF.13942.3	chr16:79171011-79171559	-	26.0176	0	0	0	0	0	0	0	0	0
CUFF.13947.1	chr16:80098550-80100092	+	4.57643	0	0	0.055307	0	0	0	0	0	0
CUFF.14082.1	chr17:6707929-6730527	+	7.20622	33.9713	0.000515	4.43933	0.00011	0.000225	0.000241	0.025876	0.000183	0.000118
CUFF.14082.2	chr17:6707994-6730527	+	10.628	35.533	2.60975	5.33245	0.712565	0.288768	1.87674	1.34066	0.375108	1.40499
CUFF.14127.1	chr17:9005778-9315614	-	2.91717	0	0	0	0	0	0	0	0	0.098009
CUFF.14233.1	chr17:13737697-13740721	+	1.06857	0.045465	0.179931	0	0.457955	0.07969	0	0	0.102874	0.136541
CUFF.14249.1	chr17:15060153-15062274	+	0.61396	0.221488	0.035035	0	0	0	2.9e-05	0	0	0
CUFF.14249.2	chr17:15060263-15062274	+	1.23674	0	0	0	0	0	0.057414	0	0	0
CUFF.14252.1	chr17:15116262-15154431	+	2.55205	0.555027	0.328609	0.201094	0.488637	0.251021	0.543553	0.264543	0.10816	9e-06
CUFF.14252.2	chr17:15116741-15141638	+	1.81152	0.489883	1.49733	0	0.454392	9.5e-05	2e-06	0	0	0.090352
CUFF.14429.1	chr17:18574693-18576309	+	632.326	5.78396	14.804	8.05558	8.16769	5.96053	5.86336	6.23368	4.86614	11.4815
CUFF.14309.1	chr17:19261736-19271868	+	9.48869	0	0	0	0	0	0	0	0	0
CUFF.14320.1	chr17:19382578-19393705	+	6.09318	0.277865	0.242591	0.32268	0.220663	0.179069	0.232587	0.141497	0	0.20228
CUFF.14361.1	chr17:20450159-20465637	-	32.0059	0	0	0	0	0	0	0.040708	0	0
CUFF.14367.1	chr17:21742834-21824383	+	9.30242	0.689932	0	3e-06	0	0	0	0	0	2e-06
CUFF.14367.3	chr17:21742834-21827271	+	5.26733	1.06326	0	0.655755	0	0	0	0	0	0.426752
CUFF.14427.1	chr17:29550445-29553218	-	6.43521	0.213023	0	0.024563	0	0	0.026557	0.032313	0	0.01786
CUFF.14436.1	chr17:29599037-29664632	-	46.1571	0.25766	0	0	0	0	0.155285	0	0	0
CUFF.14474.1	chr17:30547624-30552942	-	13.4645	0.916883	0	0.209657	0	0	0	0	0	0
CUFF.14478.1	chr17:31081363-31123904	+	3.13401	0	0	0.050741	0	0	0	0	0	0
CUFF.14490.3	chr17:31449989-31466359	+	2.34864	7e-06	7e-06	0	5e-06	0	0	6e-06	0	0
CUFF.14490.1	chr17:31449989-31829949	+	1.61969	0.163771	0.043468	0.05783	0.059275	0	0	0.038031	0	0
CUFF.14520.1	chr17:31977407-31980082	-	2.50894	0	0	0	0	0	0	0	0	0
CUFF.14676.1	chr17:52970213-52971116	+	7.3656	3.2e-05	0	0	0	0	0	0	0	0
CUFF.14676.2	chr17:52970244-52971116	+	13.9214	1.38853	0	0	0	0	0	0	0	0
CUFF.14720.3	chr17:54576204-54581380	-	8.7515	7.68842	2.12584	1.88512	0.858937	0.653833	1.01909	0.723305	2.19587	1.20187
CUFF.14823.1	chr17:56457415-56458267	-	5.20031	33.071	2.5854	8.64383	4.38342	5.26105	9.94861	38.5151	6.49782	3.25908
CUFF.14897.1	chr17:58374887-58385442	-	7.99343	0.028597	0	0.029773	0.020345	0	0	0	0	0
CUFF.14898.1	chr17:58393321-58404329	-	17.7526	0	0	0	0.126765	0	0	0.060995	0	0
CUFF.15017.1	chr17:62828247-62828707	+	3.57755	0	0	0	0	0	0	0	0	0
CUFF.15055.1	chr17:63800044-63801293	+	8.07784	0	0	0	0	0	0	0	0	0
CUFF.15173.2	chr17:65732029-65734236	+	0.993919	1.77175	0	0	0	0	0	0	0	0
CUFF.15232.1	chr17:66737222-66763469	-	5.07306	0.33035	0.013509	0.035938	0.018417	0	0.019428	0	0.019298	0
CUFF.15277.1	chr17:69362540-69363772	+	1.91664	0.100464	0	0.109801	0	0	0	0	0	0
CUFF.15278.1	chr17:69429225-69429932	-	2.47856	0.425551	0.965529	16.4623	0.159618	0.194375	0.126233	0.691162	0.87944	4.41173
CUFF.15281.1	chr17:69588626-69620632	+	32.9653	4.68956	1.52964	3.39106	2.78412	0.282277	5.13295	11.1525	6.23049	5.7086
CUFF.15305.1	chr17:70359883-70361211	-	2.31101	0	0	0	0	0	0	0	0	0
CUFF.15398.2	chr17:71963314-71972732	+	2.6583	11.0068	1.42904	5.42038	6.39647	4.59188	0.005746	4.8697	0.001694	10.3023
CUFF.15398.3	chr17:71963314-71972732	+	5.88758	17.7957	17.3743	4.42717	10.6126	4.89262	18.112	1.82803	12.7167	9.77845
CUFF.15519.1	chr18:950470-951238	+	34.3623	0	0	0	0	0	0	0	0	0
CUFF.15627.1	chr18:4820798-4877129	-	12.0732	0.277513	0	0	0	0	0	0	0	0
CUFF.15655.1	chr18:7125589-7129122	+	1.84081	0	0	0	0	0	0	0	0	0
CUFF.15686.1	chr18:8348919-8349550	-	2.56856	0	0	0	0	0	0	0	0	0
CUFF.15742.1	chr18:10854824-10856136	+	1.15144	1.82005	3.70397	0.935468	1.6196	1.194	2.22513	0.615313	3.08362	2.46109
CUFF.15895.1	chr18:17297103-17299059	+	2.93966	0	0	0	0	0	0	0	0	0
CUFF.15941.1	chr18:21986505-21989588	+	4.41456	0	0	0	0	0	0	0	0	0
CUFF.15945.1	chr18:21991308-21993552	-	1.45371	0	0	0	0	0	0	0	0	0
CUFF.15960.1	chr18:22659582-22661841	+	7.40988	0.52264	12.4912	0	0	0	0	0.437149	0	0
CUFF.15961.1	chr18:22795092-22796986	+	16.9674	0.330232	0	0	0	0	0	0	0	0
CUFF.16016.1	chr18:25081543-25084973	-	14.7268	1e-06	0	0	0.00012	0	0	0	1e-06	0
CUFF.16016.2	chr18:25081543-25085255	-	59.4766	0.057863	0	0	0.010072	0	0	0	0.112168	0
CUFF.16079.1	chr18:31093030-31119633	+	3.70645	0	0	0.06554	0	0	0	0	0	0
CUFF.16079.2	chr18:31094995-31119633	+	1.21993	0	0	4e-06	0	0	0	0	0	0
CUFF.16110.2	chr18:31433064-31448054	-	84.293	0	0	0	0	0	0	0	0	0
CUFF.16096.1	chr18:31748043-31754162	+	2.39635	0	0	0	0	0	0	0	0	0
CUFF.16100.1	chr18:32128623-32192705	+	1.38671	0.082636	0	0	0	0	0	0	0	0
CUFF.16130.1	chr18:33704235-33713502	-	7.55436	0	0	0	0	0	0	0	0	4e-06
CUFF.16130.2	chr18:33707540-33713502	-	16.169	0	0	0	0	0	0	0	0	0.051628
CUFF.16245.1	chr18:36508411-36510847	-	3.43572	7.76885	0.398078	1.5885	1.26691	2.09363	6.01117	3.04748	1.70986	0.617716
CUFF.16295.1	chr18:37152134-37157134	+	12.6358	0	0	0	0	0	0	0	0	0
CUFF.16393.1	chr18:41230422-41231260	-	3.9815	0	0	0	0	0	0.478603	0	0	0
CUFF.16824.1	chr18:53167790-53169199	-	24.0532	16.6392	0.336218	1.19258	0.025467	0	0.241765	0.049027	0.240235	0.187681
CUFF.17018.1	chr18:56531777-56534262	-	4.81843	3.42745	0.885765	5.44914	0.906161	2.32927	1.75155	3.77796	0.951439	5.43544
CUFF.17118.1	chr18:59497040-59501121	-	14.8636	3.74667	3.80876	3.79991	1.73834	2.8e-05	5.47798	0	25.6958	2.2491
CUFF.17118.2	chr18:59497040-59501121	-	4.62426	3.24745	0.000133	2.4e-05	1.9e-05	0.427567	9e-06	0	1.8e-05	1.9e-05
CUFF.17345.1	chr18:62963673-62968705	+	229.302	0	0	0	0	0	0	0	0	0
CUFF.17396.3	chr18:64523293-64534480	+	3.98598	0.185686	0	0	0	0	0	0	0	0.139384
CUFF.17487.1	chr18:65627577-65628734	-	4.47695	38.6844	6.19927	10.4948	4.86942	6.70802	13.5758	8.75207	0.403895	4.55431
CUFF.17632.1	chr19:9942039-9943638	-	1.55848	1.38909	0	0.03079	0.063119	0	0	0.060757	0	1.18037
CUFF.17635.1	chr19:9944249-9945702	-	1.27385	1.2e-05	0	0.029516	0.028768	0	0	0.193855	0	0.9864
CUFF.17635.2	chr19:9944249-9947957	-	2.37257	1.10341	0	0.137371	3e-06	0	0	2e-06	0	0.09938
CUFF.17851.2	chr19:18642179-18650167	+	35.1506	2.95868	0	0	0	0	0	0	0	0
CUFF.17851.1	chr19:18642179-18661825	+	4.08919	2.3	0	0.211395	0	0	0	0	0	0
CUFF.17877.1	chr19:18905107-18906083	+	62.6587	0	0	0	0	0	0	0	0	0
CUFF.17960.1	chr19:20938016-20939407	-	2.90509	0	0	0.051254	0	0	0	0	0	0
CUFF.17975.1	chr19:21110518-21111461	+	0.882954	0.539052	0	0.143989	0.098408	0.419505	0.07784	0.18942	0.464407	0.151016
CUFF.18016.1	chr19:22207933-22208908	+	7.02576	0	0	0.119405	0	0	0	0	0	0
CUFF.18188.1	chr19:25524748-25526039	-	4.00889	4.48109	1.57156	2.6605	0.649708	4.58747	2.26012	1.24998	1.43354	0
CUFF.18208.1	chr19:26557762-26558311	+	85.1764	0	0	0	0	0	0	0	0	0
CUFF.18340.1	chr19:28223511-28224322	+	3.99344	25.9475	8.22006	4.6386	7.25383	1.65482	6.44815	4.35869	4.2965	2.89667
CUFF.18367.1	chr19:28435825-28436637	+	1.95795	4.31563	0.347105	0.692549	0.236701	0.096081	0.37439	0.45553	0	0.077965
CUFF.18490.1	chr19:31857023-31858318	-	8.15154	0	0	0	0	0	0	0	0	0
CUFF.18586.1	chr19:35266111-35274566	-	9.49869	0.232055	0.481873	0.384575	0.175264	0.426835	0.1386	3.37277	1.24177	1.11453
CUFF.18695.1	chr19:38400630-38401510	+	2.36041	35.5171	0	2.57248	2.66094	0	0.601372	0	0.373721	0
CUFF.18707.1	chr19:38653178-38655216	+	6.03929	0	0	0	0	0	0	0	0	0
CUFF.18783.1	chr19:40133525-40134996	+	18.3989	0.276388	2.81867	0.351491	0.960843	0.390115	1.07675	0.462392	1.763	27.7861
CUFF.18786.1	chr19:40208879-40209583	-	2.94884	0	0	0	0	0	0	0	0	0
CUFF.18904.1	chr19:43358325-43360237	-	3.04879	0.109337	0	0.057913	0.158311	0	0.12523	0.15237	0	0.122879
CUFF.19031.1	chr19:46022526-46025565	-	1.3618	0	0	0	0	0	0	0	0	0
CUFF.19031.2	chr19:46024776-46025565	-	8.19249	0	0	0	0	0	0	0	0	0
CUFF.19031.3	chr19:46024776-46025565	-	2.11556	0	0	0	0	0	0	0	0	0
CUFF.19097.1	chr19:47549054-47555223	+	34.6149	0	0	0	0	0	0	0	0	0
CUFF.19097.2	chr19:47549077-47555223	+	30.0247	0	0	0	0	0	0	0	0	0
CUFF.19087.1	chr19:47921298-48000089	-	26.8018	0.104805	0	0.013501	0	0	0	0.008881	0	0.317096
CUFF.19151.1	chr19:49608769-49612072	+	4.70905	1.20578	2.93298	0.946268	3.89078	0.511306	1.04105	1.57242	1.71151	4.82449
CUFF.19307.1	chr19:54171927-54172351	+	133.791	5.30645	1.97929	0.78982	4.86197	4.38305	2.27719	2.07804	1.42063	1.75676
CUFF.19337.1	chr19:54784880-54786238	+	7.89853	2.6e-05	0.000204	0	0	0	0.270636	0.000167	0.000262	0.000183
CUFF.19337.2	chr19:54784916-54786238	+	7.53104	0.353062	0.227182	0	0	0	0.286028	0.0993	0.081025	0.790574
CUFF.19338.1	chr19:54816063-54816717	-	4.31644	0	0	0	0	0	0	0	0	0
CUFF.19375.1	chr19:56107803-56109537	-	3.51786	0	0	0	0	0	0	0	0	0
CUFF.19449.1	chr19:58059302-58064080	+	5.23761	0	0	0	0	0	0	0	0	0
CUFF.19449.2	chr19:58062771-58064080	+	2.1057	0.119521	0	0	0	0	0	0	0	0
CUFF.19539.1	chr19:62902087-62903598	-	3.83377	16.3978	0	2.64458	1.71277	1.39035	1.95637	0.457763	0.299686	1.93834
CUFF.19590.1	chr2:966676-973515	-	1.00897	0.173298	0	0.281413	0.128231	0	0.202841	0	0	0.451155
CUFF.19753.1	chr2:15463927-15464650	+	3.17662	0	0	0	0	0	0	0	0	0
CUFF.19779.1	chr2:17468338-17476686	+	2.62968	1.61763	0	0.394574	0	0	0	0	0	0
CUFF.19779.2	chr2:17468338-17476686	+	7.29584	0.022815	0	0.025677	0	0	0	0	0	0
CUFF.19871.1	chr2:18699855-18757446	+	21.979	0	0	0	0	0	0	0	0	0.328205
CUFF.19922.1	chr2:20770625-20772192	+	1.52759	0.93297	0	0.076908	0	0	0.415764	0	0.413461	0.107123
CUFF.19970.1	chr2:22103349-22107563	+	6.94228	0	0	0	0	0	0	0	0	0
CUFF.20017.1	chr2:24218323-24219117	+	7.70486	0	0	0	0	0	0	0	0.613759	0
CUFF.20052.1	chr2:25559463-25559855	+	5.98465	0	0	0	0	0	0	0	0	0
CUFF.20063.2	chr2:25738035-25757047	-	36.1159	0.497053	0	0	0.411869	0.250589	0	0	0	0
CUFF.20135.1	chr2:28364696-28381874	-	3.71354	4.13972	0	0.230888	0	0	0	0	0	0
CUFF.20144.1	chr2:28958933-29056721	-	15.1564	0	0	0	0	1.74264	0	0	0	0.234649
CUFF.20172.1	chr2:30193778-30228474	+	4.43295	0	0	0	0	0	0	0	0	0
CUFF.20173.1	chr2:30207417-30209448	+	5.4196	0	0	0	0	0	0	0	0	0
CUFF.20214.2	chr2:32912665-33033497	+	25.0839	2.4e-05	0	0.100794	0	0	0	0	0	0
CUFF.20214.1	chr2:32912665-33131844	+	10.7908	0.578302	0	0.064984	0	0	0	0.021372	0	0.023469
CUFF.20214.3	chr2:32928468-33033497	+	17.8752	0.866653	0.089505	2e-06	0	0	0.096541	0	0.031991	0
CUFF.20257.4	chr2:37684350-37704669	-	1.3427	0	0	0	0	0	0	0	0	0
CUFF.20274.3	chr2:38203449-38239018	+	3.8182	2.27685	0	0.476618	0.081451	0	0.128829	0	0	3.37052
CUFF.20281.1	chr2:38454237-38461268	+	2.26542	0	0	0	0	0.140439	0	0	0	0.109402
CUFF.20300.1	chr2:39984364-39994484	-	3.78392	1.06468	0	0.188543	0.042951	0	0	0.248032	0	0
CUFF.20325.1	chr2:42411509-42725198	-	8.25309	0	0	0	0	0	0	0	0	0.597961
CUFF.20325.2	chr2:42447410-42725198	-	17.7777	0	0	0	0	0	0	0	0	0
CUFF.20325.3	chr2:42493826-42725198	-	28.7984	0	0	0	0	0	0	0	0	0
CUFF.20387.1	chr2:46535881-46599714	-	7.18324	1.82488	0.066375	1e-06	0	0	0.095458	0	0	0
CUFF.20387.2	chr2:46535881-46599714	-	1.33999	1.36411	2e-06	0.200456	0	0	2e-06	0	0	0
CUFF.20395.1	chr2:46672584-46675464	-	1.83008	0.144809	0	0	0	0	0	0	0	0
CUFF.20395.2	chr2:46675294-46681547	-	1.76275	0	0	0	0	0	0	0	0	0
CUFF.20468.2	chr2:51343373-51344235	+	83.216	0	0	0	0	0	0	0	0	0
CUFF.20468.3	chr2:51343373-51410030	+	34.7332	0	0	0	0	0	0	0	0	0
CUFF.20468.1	chr2:51343373-51447505	+	40.2458	0	0	0	0	0	0	0	0	0
CUFF.20472.1	chr2:51517216-51591197	-	2.69776	0	0	0	0.07961	0	0	0	0	0
CUFF.20465.1	chr2:51602541-51803360	-	0.963964	0.789436	1.0492	0.115362	0.168807	0.03201	0.58207	0.050587	0.082691	0.026781
CUFF.20465.2	chr2:51604308-51626606	-	0.810402	0	0.093372	0	0.072617	0.031722	0	0	1e-06	0
CUFF.20465.3	chr2:51604308-51719967	-	0.888601	0	0.150294	0	0	0	0	0	0	0
CUFF.20476.1	chr2:51697675-51806169	+	1.94076	0	0	0	0	0	0	0	0	0
CUFF.20525.1	chr2:59083890-59120511	+	1.8854	0	0	0	0	0	0	0	0	0
CUFF.20554.1	chr2:61043617-61044769	-	33.286	0.850942	0	1.04997	0	0	0	0	0	0
CUFF.20560.1	chr2:61285889-61496519	-	1.86193	0	0	0	0	0	0	0	0.08285	0
CUFF.20560.2	chr2:61486462-61496519	-	5.41831	0	0	0	0	0	0	0	0	0
CUFF.20620.1	chr2:65212990-65216749	-	21.3484	0	0	0	0	0	1.17065	0	0	1.20661
CUFF.20635.1	chr2:66022255-66023135	+	10.3577	0	0	0	0	0	0	0	0	0
CUFF.20642.1	chr2:67308554-67309421	-	6.10198	0	0	0	0	0	0	0	0	0
CUFF.20667.1	chr2:70424706-70429153	-	3.64747	2.96113	0.328682	0.276123	0.31449	0.057462	0.049757	0.090811	0	0.032869
CUFF.20668.1	chr2:70429413-70438173	+	9.42018	4.79683	0	1.8e-05	0	0	2.1e-05	0	0	1.2e-05
CUFF.20668.2	chr2:70432495-70438173	+	5.89535	16.3515	0	2.459	0	0	0.156366	0	0	0.095507
CUFF.20681.1	chr2:71976949-71996412	+	1.72049	0.768496	0.393527	0.190344	0.097557	0.039611	0.308699	0.187801	0.409079	0.407314
CUFF.20722.1	chr2:73723607-73762412	-	40.1465	3.27751	2.69811	6.5796	2.86736	2.48953	3.88027	1.96718	7.79322	5.77105
CUFF.20753.1	chr2:80418507-80423974	+	4.05459	0	0	0	0	0	0	0	0	0
CUFF.20756.1	chr2:80534574-80621539	+	17.2074	0	0	0	0	0	0	0	0	0
CUFF.20777.1	chr2:85631508-85633487	+	2.90563	0	0	0	0	0	0	0	0	0
CUFF.20828.1	chr2:88855629-88896834	-	5.11874	0	0	0	0	0	0	0	0	0
CUFF.20935.1	chr2:92739188-92749578	+	8.02026	0	0	0	0	0	0	0	0	0
CUFF.20943.1	chr2:92890442-92912017	-	2.47547	3.23297	0	0.497856	0	0	0	0	0	0
CUFF.20946.2	chr2:92942467-92963729	+	0.810635	0	0	0	0	0	0	0	0	0
CUFF.20946.1	chr2:92942467-92977018	+	1.19716	1.95838	0	0.112856	0	0	0	0	0	0
CUFF.20967.2	chr2:93289727-93451728	+	7.88974	1.72897	0.449451	1.7935	0.408962	0.497646	5.49418	1.57292	3.22816	0.532156
CUFF.21036.1	chr2:96101272-96105267	+	5.24884	3e-06	0	0	0	0	4e-06	0	3e-06	0
CUFF.21036.2	chr2:96101841-96105267	+	9.05991	0.55939	0	0	0	0	0.372433	0	0.37233	0
CUFF.21040.1	chr2:96135919-96138608	-	1.47248	0	0.000148	0	0.0001	0	0.003859	0	0	0
CUFF.21040.2	chr2:96135919-96138608	-	3.56388	0	0.068924	0	0.0627	0	0.095188	0	0	0
CUFF.21067.1	chr2:96581809-96584351	+	38.3237	0.424222	0.32783	0.178388	0.143564	0.564274	0.381459	0.177308	0.1916	0.470141
CUFF.21067.2	chr2:96581846-96591657	+	22.0892	0.024115	0	0	0	0	0	0	0	0
CUFF.21110.1	chr2:101441284-101448103	+	5.37639	0	0	0	0	0	0	0	0	0
CUFF.21131.1	chr2:103147174-103175176	-	71.7343	0	0	0	0	0	0	0	0	0
CUFF.21279.1	chr2:111494710-111495084	-	353.745	0	0.618259	0	0.281403	0	0	0	0	0
CUFF.21303.1	chr2:113305903-113307845	+	7.23271	0	0	0	0	0	0	0	0	0
CUFF.21316.1	chr2:115731736-115756902	-	16.608	0.412569	1.82816	12.6449	6.65239	8.29918	3.15497	4.31859	4.98423	1.64439
CUFF.21451.1	chr2:124429346-124430216	-	10.6112	0	0	0	0	0	0	0	0	0
CUFF.21578.1	chr2:127810759-127812760	+	1.92651	0.178609	0	0	0	0	4.01718	0	0	0.390614
CUFF.21627.1	chr2:129196883-129204568	+	17.8473	0.20314	0	0.47788	0	0	0	0	0	0
CUFF.21647.1	chr2:129840848-129842066	+	7.64817	0	0	0	0	0	0	0	0	0
CUFF.21666.1	chr2:130819537-130823181	+	1.45203	0	0	0	0	0	0	0	0	0
CUFF.21666.2	chr2:130819553-130824656	+	1.64959	0	0	0	0	0	0	0	0	0
CUFF.21739.1	chr2:134202899-134203624	+	2.88831	0	0	0	0	0	0	0	0	0
CUFF.21758.1	chr2:135184272-135188238	-	2.01321	0.631192	0	0.084963	0	0	0	0	0	0
CUFF.21859.1	chr20:3427933-3432926	-	11.3065	0	0	0	0	0.313707	0	0	0	0
CUFF.21860.1	chr20:3434407-3436330	-	8.50132	0.179976	0	0	0	0	0	0	0	0
CUFF.21899.1	chr20:4763597-4767990	+	37.8353	2.18875	5.31382	2.65055	2.42243	1.4709	0	4.06798	0.963595	6.63089
CUFF.21940.1	chr20:7319296-7323209	-	6.7203	0	0	0	0	0	0	0	0	0
CUFF.21947.1	chr20:7422560-7424409	+	4.46582	0	0	0	0	0	0	0	0	0
CUFF.21952.1	chr20:7427937-7495813	-	0.842094	0	0	0	0	0	0.095051	0.028909	0	0
CUFF.21952.2	chr20:7427937-7495813	-	1.78819	0	0	0	0	0	1e-05	6e-06	0	0
CUFF.21952.3	chr20:7442293-7495813	-	1.86603	0	0	0	0	0	0	0	0	0
CUFF.21952.4	chr20:7457531-7495813	-	1.92277	0	0	0	0	0	0	0	0	0
CUFF.21952.5	chr20:7457531-7495813	-	2.32502	0	0	0	0	0	0	0	0	0
CUFF.21950.1	chr20:7519412-7533334	-	15.9632	0	0	0	0	0	0	0	0	0.050849
CUFF.22035.1	chr20:10697108-10703079	+	3.98941	0.280411	0	0	0	0.131165	0	0.414577	0	0
CUFF.22036.1	chr20:11176940-11197136	+	29.9117	0	0	0	0	0.87449	0	4.14603	0	0.580615
CUFF.22056.1	chr20:11879790-11981576	-	1.2395	0	0	0	0	0	0	0	0	0
CUFF.22056.2	chr20:11977741-11981576	-	0.990786	0	0.043108	0	0	0	0	0	0	0
CUFF.22061.1	chr20:12005563-12060939	-	5.37622	0	0	0	0	0	0	0	0	0
CUFF.22063.1	chr20:12061021-12062214	+	1.3426	0	0	0	0	0	0	0	0	0
CUFF.22072.4	chr20:12946713-12998094	-	6.10135	0	0.259064	0	0	0	0.372571	0	0	0
CUFF.22107.1	chr20:14326468-14340995	+	2.32609	0.383061	1e-06	1e-06	1e-06	1e-06	2e-06	0.384895	1e-06	1e-06
CUFF.22107.2	chr20:14326468-14340995	+	2.24403	0.007792	1e-06	1e-06	1e-06	1e-06	1e-06	0.024389	1e-06	1e-06
CUFF.22107.3	chr20:14336918-14340995	+	11.1246	0	0.817257	0.176756	0.201309	0.559119	0.210219	0	0.08355	0.929781
CUFF.22116.1	chr20:14409891-14417352	+	6.50833	4.13921	0	2.22927	0	0	0	0.977549	0	0
CUFF.22142.2	chr20:15805951-15810177	+	5.19192	0	0	0	0	0	0	0	0	0
CUFF.22142.3	chr20:15805951-15810177	+	8.52544	0	0	0	0	0	0	0	0	0
CUFF.22142.1	chr20:15805951-16005573	+	4.54465	0	0	0	0	0	0	0	0	0.055838
CUFF.22142.4	chr20:15805951-16117197	+	2.89085	0	0	0	0	0	0	0	0	6e-06
CUFF.22188.1	chr20:16622831-16697918	-	12.6033	0	0	0	0	0	0	0	0	0
CUFF.22188.3	chr20:16668835-16697918	-	2.13834	0.04629	0	0	0	0	0	0	0	0
CUFF.22206.1	chr20:17252554-17256405	+	3.9145	1.35597	0	0	0	0	0	0	0	0
CUFF.22225.1	chr20:17782009-17803442	-	1.64457	0	0.000955	0	0.000855	0	0.001386	0	0	0
CUFF.22225.2	chr20:17782009-17808430	-	8.19506	0	0.249871	0	0.03713	0	0.058709	0	0	0
CUFF.22238.1	chr20:18132237-18135074	+	59.2769	0	0.02019	0	0	0	0.029036	0	0.057693	0
CUFF.22236.1	chr20:18181822-18184276	-	1.96302	0	0	0	0	0	0	0	0	0
CUFF.22251.2	chr20:18677172-18722499	+	19.9871	0.063807	0	0	0	0	0.073533	0	0	0
CUFF.22251.3	chr20:18719380-18722499	+	6.44726	0	0	0	0	0	0	0	0	0
CUFF.22272.1	chr20:19814581-19815027	-	16.5879	0	0	0	0	0	0	0	0	0
CUFF.22293.1	chr20:20799330-20811507	-	4.81813	0	0.056014	0	0.050922	0	0	0	0	0
CUFF.22364.1	chr20:25316193-25373564	+	28.4665	0.118098	0	0	0	0	0	0	0	0
CUFF.22371.1	chr20:25545323-25548120	+	1.5555	0	0	0	0	0	0	0	0	0
CUFF.22415.1	chr20:31718973-31720551	+	1.21663	0	0	0	0	0.08596	0	0	0	0
CUFF.22415.2	chr20:31718973-31726277	+	0.765783	0.104966	0	1e-06	0	1e-06	0	0	0	0
CUFF.22415.3	chr20:31722877-31726277	+	3.41709	0.022928	0	0.066528	0.02273	0.083069	0	0	0	0
CUFF.22435.2	chr20:32287644-32306988	-	2.38407	0	0	1e-06	0	0	0	0	0	1e-06
CUFF.22435.1	chr20:32287644-32597268	-	2.29229	0.282785	0	0.102579	0	0	0.221821	0.134948	0	0.069991
CUFF.22494.1	chr20:36618446-36620213	-	4.80161	0.970059	0	0	0	0	0	0	0	0
CUFF.22496.1	chr20:36673421-36676124	-	6.31029	0	0	0.032005	0	0	0	0	0	0.023126
CUFF.22598.1	chr20:41694100-41699736	-	2.46314	0.048051	0	0	0.069264	0	0.054792	0.033334	0	0
CUFF.22600.1	chr20:41767017-41773183	-	1.22482	0	0.06458	0	0.146754	0	0	0.113005	0	0
CUFF.22602.1	chr20:41768515-41769066	-	5.36511	0	0	0	0	0	0	0	0	0
CUFF.22592.1	chr20:41889784-41899790	-	8.22443	0.494013	0	1.33308	2.36898	0	0	5.78717	0	0.183906
CUFF.22606.1	chr20:43372980-43376481	+	15.7358	4.52497	0	0.578273	0	0	0	0	0	0
CUFF.22612.1	chr20:43959585-44020033	+	10.433	0.049906	0	0	0.011872	0	0	0	0	0.02505
CUFF.22644.1	chr20:50445012-50449743	+	10.6779	0	0	0	0	0	0	0	0	5.15127
CUFF.22652.1	chr20:52717507-52719116	+	10.2588	0	0	0	0	0	0	0	0	0
CUFF.22652.2	chr20:52718710-52719116	+	12.0767	0	0	0	0	0	0	0	0	0.715944
CUFF.22711.1	chr20:59066188-59067952	+	6.50714	0	0	0	0	0	0	0	0	0
CUFF.22711.2	chr20:59066217-59067952	+	4.30417	0	0	0	0	0	0	0	0	0
CUFF.22757.1	chr20:65426611-65427568	-	6.50916	2.94243	6.90441	3.67354	5.02456	4.20463	6.70243	1.81223	3.71427	4.13158
CUFF.22937.1	chr21:12013104-12014040	+	6.20275	0	0	0	0	0	0	0	0	0
CUFF.22945.1	chr21:14507552-14519318	-	6.23977	10.5277	96.4552	15.9735	39.4848	19.5726	17.4086	16.1383	31.4963	26.5018
CUFF.22960.1	chr21:15067266-15091821	+	9.11477	0	0	0	0	0	0	0	0	0
CUFF.22971.1	chr21:15588675-15597591	-	2.44327	0.219846	0	0	0	0	0	0	0	0
CUFF.22974.1	chr21:15909737-15912249	+	11.6508	6.2e-05	0	0	0	0	0	0	0	0
CUFF.22974.2	chr21:15910196-15912249	+	3.30279	0.340796	0	0	0	0	0	0	0	0
CUFF.23002.1	chr21:17137794-17143896	+	1.22257	0.000434	0.000334	0.00049	0.000313	0	0	0	0	0
CUFF.23002.2	chr21:17137794-17143896	+	1.42335	0.041807	0.18065	0.021385	0.014635	0	0	0	0	0
CUFF.23060.1	chr21:21854988-21857959	-	2.21805	0	0	0	0	0	0	0	0	0
CUFF.23317.1	chr21:30993863-30996403	+	1.36565	0	0.113588	0	0.103251	0	0	0	0	0
CUFF.23410.1	chr21:33880952-33887244	+	1.56689	0	0	0	0	0	0	0	0	0
CUFF.23424.1	chr21:34146834-34149947	+	5.16879	0	0.479729	0	1.96446	3.45261	0.344959	0	0.344696	10.4825
CUFF.23430.1	chr21:34203882-34205242	-	28.9335	32.3874	0	0	0	0	0	0	0	0
CUFF.23471.1	chr21:35771069-35778232	-	36.133	0	0	0	0	0	0	0	0	0
CUFF.23473.1	chr21:35778987-35779742	+	5.21769	0	0	0	0	0	0	0	0	0
CUFF.23498.1	chr21:36310835-36334572	-	19.6413	0	0	0	0	0	0	0	0	0.165798
CUFF.23502.1	chr21:36839667-36989990	-	7.27927	0.000233	0	0.683466	0	0	0	0	0	0
CUFF.23502.2	chr21:36891814-36989990	-	17.4913	0.86981	0	5.7e-05	0	0	0	0	0	0
CUFF.23513.1	chr21:37326619-37330597	+	6.86165	0.020577	0	0	0	0.01774	0	0	0.045776	0.031076
CUFF.23530.1	chr21:37982847-37989614	+	20.2441	0.044318	0	0	0	0	0	0.010025	0	0.01117
CUFF.23545.1	chr21:38622806-38798565	+	10.035	0	0	0	0	0	0	0	0	0
CUFF.23545.2	chr21:38622806-38798565	+	8.31853	0.110228	0	0	0	0	0	0	0	0
CUFF.23544.1	chr21:39054010-39227942	-	4.72538	0	0	0	0	0	0	0	0	0
CUFF.23550.1	chr21:39547410-39561842	-	5.11024	0	0	0	0	0	0	0	0	0
CUFF.23552.1	chr21:39674339-39680393	+	4.29162	1.64482	0	0	0	0	0	0	0	4.0996
CUFF.23552.2	chr21:39674339-39680393	+	21.2105	3.05444	0	0	0	0	0	0	0	0.00069
CUFF.23612.1	chr21:43865673-43870447	+	4.12188	0.156812	0	0	0	0	0	0	0.384314	0.344472
CUFF.23721.1	chr21:43876777-44135605	+	190.441	0.064013	0.051303	0.06824	0.186549	0	0.07378	0.942592	0.073359	3.58942
CUFF.23623.1	chr21:44879103-44880244	-	2.63914	0.266341	0	0	0	0	0	0	0	0
CUFF.23624.1	chr21:45080818-45254611	-	17.9639	3.25018	0	0.702057	0	0	0	0	0	0
CUFF.23624.2	chr21:45133073-45254611	-	6.38494	0.488528	0.048621	0.072139	0	0.026917	0.034962	0	0.034737	0.046719
CUFF.23676.1	chr21:46558949-46617020	+	6.04209	0.30604	0	0	0	0	0	0	0	0
CUFF.23676.2	chr21:46558951-46830251	+	15.5114	1.43769	0	0	0	0	0	0	0	0
CUFF.23718.1	chr21:48478540-48479678	-	19.8771	0	0	0	0	0	0	0	0	0
CUFF.23720.3	chr21:48491435-48570018	+	3.09269	0	0	0	1e-06	0	0	0	0	0
CUFF.23720.2	chr21:48491435-48589973	+	3.97112	0	0	0	0	0	0	0	0	0
CUFF.23720.1	chr21:48491435-48659377	+	4.0115	0.06391	0	0	0.093117	0	0	0	0	0
CUFF.23745.1	chr21:49813414-49816488	+	1.88672	6.42878	0.210523	0.350032	0.38276	0.93239	0.302762	0.644662	0.376304	1.02958
CUFF.23757.1	chr21:50577749-50637597	-	11.0239	0.21806	0	0.077943	0	0	0	0	0	0
CUFF.23775.1	chr21:52104218-52112515	+	8.23733	0.054369	0	0	0	0	0	0	0	0.366641
CUFF.23786.1	chr21:52615602-52693715	+	0.949432	0	0	0	0	0	0	0	0	0
CUFF.23786.2	chr21:52615640-52693715	+	1.0573	0	0	0	0	0	0	0	0	0
CUFF.23836.4	chr21:54332886-54344746	-	5.68989	0	0.495819	1.50745	0.257875	0.627411	0	0.247884	0	0.322277
CUFF.23836.5	chr21:54332886-54344746	-	3.63097	0.138252	1e-06	1e-06	2e-06	2e-06	0	1e-06	0	2e-06
CUFF.23809.1	chr21:54367603-54586183	-	7.91508	0.04759	0	0	0	0	0	0	0	0
CUFF.23809.2	chr21:54401130-54586183	-	30.2072	0	0	0	0	0	0	0	0	0
CUFF.23809.3	chr21:54584846-54586183	-	36.4583	0	0	0	0	0	0	0	0	0
CUFF.23965.1	chr21:57541740-57544813	-	0.674435	0	0	0	0	0	0	0	0	0
CUFF.23965.2	chr21:57544181-57544813	-	1.8775	0	0	0	0	0	0	0	0	0
CUFF.23968.1	chr21:57548014-57551975	+	2.61754	0	0	0	0	0	0	0	0	0
CUFF.24031.1	chr21:60876124-60877089	+	20.4875	0.510288	1.22087	0.060145	0.73987	0.450593	0.130057	0.395611	0.452528	0.849219
CUFF.24047.1	chr21:62200669-62201724	-	2.2026	0	0	0	0	0	0	0	0	0
CUFF.24047.2	chr21:62200669-62201724	-	3.41698	0	0	0	0	0	0	0	0	0
CUFF.24070.1	chr21:63692247-63696551	+	13.1037	0	0	0	0	0	0	0	0	0
CUFF.24263.1	chr22:5911463-5927113	+	5.19408	0.497106	0	0	0	0	0	0.058843	0.096212	0
CUFF.24340.2	chr22:9920978-9923118	+	1.38829	0.804965	0.609392	0.371357	0.000158	0.877159	0.519606	0.159947	0.697287	0.393841
CUFF.24340.1	chr22:9920978-10043593	+	1.21416	0.181044	0	0.202106	0.228289	0	0.187117	3e-06	2e-06	1e-06
CUFF.24424.1	chr22:12750929-12752470	+	2.33823	46.1062	0	2.50632	0	0	0.112909	0.06869	0	0.284601
CUFF.24478.1	chr22:14742284-14752086	+	66.367	0.428507	0	0	0	0	0	0	0	0
CUFF.24510.1	chr22:15423581-15424338	+	3.72651	0	0	0	0	0	0	0	0	0
CUFF.24554.1	chr22:16210128-16219882	-	95.8107	0.523636	0	0	0	0	0	0	0	0
CUFF.24653.2	chr22:17915477-17922490	+	2.79725	4e-06	4e-06	4e-06	3e-06	0	0.212271	3e-06	4e-06	0
CUFF.24653.1	chr22:17915477-17936864	+	13.1044	1.6935	9.68159	0.079	1.34993	0	0.722229	1.19523	0.084945	0
CUFF.24661.1	chr22:18133285-18162237	+	3.32125	0	0	0	0	0	0	0	0	0
CUFF.24661.2	chr22:18133296-18409351	+	12.8574	0	0	0	0	0	0	0	0	0
CUFF.24661.3	chr22:18156222-18170018	+	2.79998	0	0	0	0	0	0	0	0	0
CUFF.24661.4	chr22:18156222-18258891	+	3.26624	0	0	0	0	0	0	0	0	0
CUFF.24685.1	chr22:20592966-20596344	-	1.09597	0	0	0	0	0	0	0	0	0
CUFF.24730.1	chr22:21057086-21165564	-	3.55221	0.093599	0.023272	0.050178	0	0	0	0	0	0
CUFF.24730.2	chr22:21117732-21165564	-	7.18536	0.531928	0	0.192801	0	0	0	0	0	0
CUFF.24730.3	chr22:21117732-21165564	-	14.6134	0.444576	0	2.9e-05	0	0	0	0	0	0
CUFF.24726.4	chr22:21461759-21475435	+	3.91616	17.1031	0.509879	0.339106	0.69603	0	0	0	0	1.57479
CUFF.24773.1	chr22:25687512-25690261	+	8.85913	0	0	0	0	0	0	0	0	0
CUFF.24961.1	chr22:31295868-31321291	-	7.21061	0	0	0	0	0	0	0	0	0
CUFF.24902.1	chr22:32712305-32716120	+	27.6582	0.022262	0.034705	0.023081	0	0	0	0	0	0.033607
CUFF.24910.1	chr22:32897020-32906984	+	6.99167	0.567935	0.692846	0.032914	0.067473	0.986323	0.213516	0.692777	0	0.570359
CUFF.24938.1	chr22:34903810-34906143	+	2.9283	0.198456	0	0	0	0	0.405074	0	0	0
CUFF.24984.1	chr22:36638797-36645173	+	1.69387	0.266129	0	0	0	0	0	0	0	0
CUFF.24984.2	chr22:36641740-36645173	+	3.34709	2e-06	0	0	0	0	0	0	0	0
CUFF.25014.2	chr22:37676913-37677706	-	14.2348	0	8e-06	3e-06	3.2e-05	3e-06	0.000103	0.551906	0.254193	0
CUFF.25014.1	chr22:37676913-37717421	-	12.6884	0.256586	3.82563	1.11024	1.64417	1.77136	1.50045	1.08157	1.00445	1.1454
CUFF.25024.1	chr22:39081700-39111487	+	3.85322	0.166265	0.183472	0	0.083412	0	0	0	0	0
CUFF.25051.1	chr22:41146210-41147697	+	13.3182	0.380087	0	0	0	0	0	0.63561	0	0
CUFF.25180.1	chr22:44561384-44667012	+	10.6779	1.66658	0.256943	0.683541	1.87068	1.13798	2.21712	0.674408	2.21639	1.18876
CUFF.25189.1	chr22:45017494-45019236	-	2.45364	0.035282	0.069345	0.036895	0.025212	0.046068	0.039891	0.024268	0.039638	0.09293
CUFF.25190.1	chr22:45019979-45075499	-	28.55	0	0	0	0	0	0	0	0	0
CUFF.25190.2	chr22:45032154-45075499	-	7.87795	0.551256	0	0	0	0	0	0	0	0
CUFF.25213.1	chr22:46312827-46314544	+	1.18988	0.065708	0	0	0	0	0	0.046127	0	0
CUFF.25315.1	chr22:50461961-50463388	-	2.78686	0.052223	0	0	0	0	0	0	0.05936	0
CUFF.25422.1	chr22:52864566-52870148	-	7.68067	2.28571	3.89256	1.2046	2.93862	1.21382	1.41665	1.32056	0.851148	1.8647
CUFF.25449.2	chr22:53849212-53851885	+	2.57222	0.245986	0	0.088484	0	0	0	0	0	0.305268
CUFF.25460.1	chr22:54099739-54100661	-	14.5278	13.9849	0	2.06684	0.942746	0	1.86221	1.35948	0.744674	0
CUFF.25553.1	chr22:56761761-56762742	-	2.4401	0	0	0.16328	0.111635	0	0	0	0	1.91362
CUFF.25583.1	chr22:57562931-57567835	+	1.58142	0	0	0	0	0	0	0	0	0
CUFF.25598.1	chr22:58026300-58032879	+	21.3359	4.92993	0	0	0.589089	0	0	0	0	1.83805
CUFF.25767.1	chr23:8055107-8070457	+	6.98407	0.258121	0	0	0	0	0	0	0	0
CUFF.25823.1	chr23:9372946-9379439	+	267.842	0	0	0	0	0	0	0	0	0
CUFF.25831.1	chr23:9470284-9471266	+	17.4992	0	0	0	0	0	0	0	0	0
CUFF.25908.1	chr23:11678261-11681072	+	9.1207	0	0	0	0	0	0	0	0	0
CUFF.25909.1	chr23:11684111-11684840	+	150.393	0	0	0	0	0	0	0	0	0
CUFF.26089.1	chr23:16928497-16929129	+	1.36426	1.13013	0.105002	0.139668	0.095482	0.232523	0.302016	0.551206	0	0
CUFF.26256.1	chr23:27323702-27324967	-	8.82359	7.25507	23.7284	6.60602	26.5471	9.82292	11.7819	9.87876	18.569	31.4249
CUFF.26262.1	chr23:27354601-27355157	+	3.97565	2.79424	0.59002	2.04051	1.82431	0.522631	1.52736	2.27135	0.169037	0.41075
CUFF.26401.1	chr23:30328503-30332003	-	1.64747	0.128857	0	0	0.046953	0	0.148561	0.090379	0	0.28899
CUFF.26414.1	chr23:30797869-30800239	-	9.17596	3.86554	14.0553	1.73464	2.63582	1.44394	4.79291	0.887426	1.86943	4.05181
CUFF.26425.1	chr23:31332908-31335190	-	7.04706	0	0	0	0	0	0	0	0	0
CUFF.26482.1	chr23:32804507-32815359	-	4.1496	0	0	0	0	0	0	0	0	0
CUFF.26518.1	chr23:33261039-33268244	+	2.438	0.084206	0.223764	0	0	0	0	0	0	0
CUFF.26530.1	chr23:35370283-35375387	-	1.42961	0	0	0	0	0	0	0	0	0
CUFF.26533.1	chr23:35378916-35381157	+	6.85831	0.132828	0	0	0.015682	0	0.049628	0	0	0.01671
CUFF.26656.1	chr23:36027626-36132351	-	263.83	0.000254	0	0.000266	0.000186	0.000222	0	0.000175	0.000288	1.1555
CUFF.26656.2	chr23:36033738-36132351	-	1167.03	0.359455	0	0.455223	2.18235	0.378935	0	0.299427	0.493047	6e-06
CUFF.26540.1	chr23:36133706-36179798	-	29.3984	0	0	0	0	0	3.25905	0	1.09779	0
CUFF.26616.1	chr23:38115031-38139725	+	1.95647	0	0	0	0	0	0	0	0	0
CUFF.26616.2	chr23:38115031-38146216	+	1.0439	0	0	0	0	0	0	0	0	0
CUFF.26650.1	chr23:39785513-39793197	+	4.83083	0	2e-06	0	0	0	0	0	0	0
CUFF.26650.2	chr23:39791291-39793197	+	3.98665	0	0.837302	0	0	0	0	0	0	0
CUFF.26677.1	chr23:40202139-40219039	+	1.8943	0	1.86833	0.632444	0.623211	0.179732	0.308351	0.153528	1.54586	0.446605
CUFF.26677.2	chr23:40202139-40588543	+	1.81976	4.2e-05	3.3e-05	4.5e-05	3.1e-05	3.7e-05	5e-05	2.9e-05	4.8e-05	3.4e-05
CUFF.26677.3	chr23:40202139-40588543	+	1.14712	0.977415	5.83239	2.65494	0.725687	1.12957	0.95795	0.430966	2.98912	4.64072
CUFF.26715.1	chr23:40801029-40802222	-	8.52096	0	0	0	0	0	0	0	0	0
CUFF.26734.1	chr23:41484898-41486521	-	7.30656	0	0	0	0	0	0	0	0	0
CUFF.26736.1	chr23:41486639-41512766	+	4.92654	0	0	0	0	0	0	0	0	0
CUFF.26736.2	chr23:41486639-41523204	+	1.8995	0.069022	0	0	0	0	0	0	0	0
CUFF.26742.1	chr23:41796777-41797678	+	2.94042	0	0	0	0	0	0	0	0	0.089292
CUFF.26832.3	chr23:45301129-45303420	+	43.8053	2.69434	4.10971	0.54665	2.93554	1.36512	1.60424	1.79782	1.93126	1.30403
CUFF.26830.1	chr23:45845657-45851640	+	3.97751	0	0	0	0	0	0	0	0	0
CUFF.27032.1	chr24:2669494-2673016	+	1.74912	17.904	5.73649	7.36339	7.25834	9.33299	10.8114	10.0232	2.9866	17.0658
CUFF.27091.1	chr24:6820549-6910577	-	5.4395	2.6e-05	0	1e-06	0	0	0	0	0	0
CUFF.27091.3	chr24:6820549-6910577	-	6.42189	0.633741	0	0.16368	0	0	0	0	0	0.11609
CUFF.27091.2	chr24:6820549-6915827	-	24.4625	0.044205	0	9e-06	0	0	0	0	0	0
CUFF.27083.2	chr24:7306953-7328822	-	16.4289	6.13502	8.39272	7.81446	11.486	6.50488	14.4839	8.07719	17.1028	1.25568
CUFF.27096.1	chr24:8330209-8331543	+	4.52213	0	0	0	0	0	0	0	0	0
CUFF.27117.1	chr24:11214078-11227142	-	9.28548	0	0	0	0	0	0	0	0	1.05937
CUFF.27157.1	chr24:19816363-19818507	-	4.44691	0.271772	0	0	0	0	0	0	0	0
CUFF.27157.2	chr24:19817043-19818507	-	4.47838	0	0	0	0	0	0	0	0	0
CUFF.27215.1	chr24:22170063-22192734	-	43.9844	12.0334	21.7267	34.0407	40.1194	4.73533	16.544	66.4314	44.5402	105.454
CUFF.27223.1	chr24:22373676-22375348	+	3.63362	0	0	0	0	0	0	0	0	0
CUFF.27235.1	chr24:23643853-23680650	-	2.83089	0	0	0	0	0	0	0	0	0
CUFF.27296.1	chr24:29341485-29343730	-	1.53622	0.205612	0	0	0	0	0	0	0	0
CUFF.27297.1	chr24:29342085-29343730	+	2.89452	0.071767	0	0	0	0	0	0	0.082692	0
CUFF.27363.1	chr24:32464473-32488601	-	1.44487	0	0	0	0	0	0	0	0	0
CUFF.27380.1	chr24:33325191-33329322	+	4.94353	0	0	0.032807	0.022418	0	0.035471	0	0	0
CUFF.27443.1	chr24:35526054-35528961	+	26.3195	0	0	0	0	0	0	0	0	0
CUFF.27517.2	chr24:38321672-38341737	+	1.75205	0.196941	0	0	0	0	0	0	0	0
CUFF.27517.1	chr24:38321672-38359156	+	2.64784	0	0	0.073428	0	0	0	0	0	0
CUFF.27523.1	chr24:38380664-38722659	-	1.26636	3.18145	0	0.000312	5.1e-05	0	0	0	1e-06	0.003314
CUFF.27523.2	chr24:38409323-38652093	-	1.28873	0.590681	0	0.944082	0.12683	0	0	0	0	0.311808
CUFF.27523.3	chr24:38411235-38722659	-	2.3315	0.000652	0	0.238653	0.41287	2.2e-05	0	0	2.9e-05	3.64588
CUFF.27523.4	chr24:38565777-38722659	-	1.55866	0	0	0	1e-05	0.078419	0	0	0.101327	0
CUFF.27520.1	chr24:38723976-38731782	+	1.73311	0	0.062336	0.082916	0	0.03451	0	0	0.089089	0
CUFF.27540.2	chr24:39156475-39165935	-	3.85067	0	0	0	0	0	0	0	0	0.009254
CUFF.27626.1	chr24:43632447-43634625	-	12.5822	3.3267	0	0.938012	0	0	0	0	0	0
CUFF.27694.1	chr24:47560073-47563327	+	6.32958	0	0	0	0	0	0	0	0	0
CUFF.27746.1	chr24:50474902-50493489	+	1.63986	0	0	0	0.031166	0	0	0	0	0
CUFF.27761.2	chr24:50765855-50766338	+	18.1967	0	0	0	0	0	0	0	0	0
CUFF.27786.1	chr24:51422872-51424000	+	4.02474	0	0	0	0	0	0	0	0	0
CUFF.27793.1	chr24:52095785-52115776	+	4.28115	0	0	0	0	0	0	0	0	0
CUFF.27814.1	chr24:53617526-53619239	-	2.40803	0	0	0	0	0	0	0	0	0
CUFF.27815.1	chr24:53619932-53632739	-	3.34988	0.268479	0	0.328807	0	0	0	0	0	0
CUFF.27824.2	chr24:53734249-53937805	-	7.34274	0	0	0	0	0	0	0	0	0
CUFF.27824.3	chr24:53734249-53937814	-	18.5557	0	0	0	0	0	0	0	0	0
CUFF.27824.1	chr24:53734249-53939786	-	2.47566	0	0	0	0	0	0	0	0	0
CUFF.27852.1	chr24:55034963-55037208	+	5.42208	0	0	0	0	0	0.126598	0	0	0
CUFF.27880.1	chr24:55678873-55682355	-	1.66403	0	0	0	0	0	0	0	0	0
CUFF.27882.1	chr24:55684363-55693037	+	1.14555	0.672401	0	1.3e-05	0	0	0	0	0	6e-06
CUFF.27882.2	chr24:55684379-55693037	+	1.51011	0.059044	0	0.132358	0	0	0	0	0	0.176482
CUFF.27884.1	chr24:56037866-56039788	+	2.81417	0	0	0	0	0	0	0	0	0
CUFF.27898.1	chr24:57241397-57246707	+	1.52041	0	0.305538	0	0	28.079	0	0	0	0.810837
CUFF.27957.1	chr24:58836070-58840067	-	6.15388	0	0	0	0	0	0	0	0	0
CUFF.27957.2	chr24:58838576-58840067	-	26.0859	0	0	0	0	0	0	0	0	0
CUFF.27996.1	chr24:59513151-59557157	-	2.94004	0.073433	0	0.014933	0	0	0.000141	0	0.000131	0
CUFF.27996.2	chr24:59513151-59557157	-	2.78429	0.040694	0	0	0	0	0.033277	0	0.049637	0
CUFF.27996.3	chr24:59522131-59557157	-	16.067	0.139417	0	0	0	0	0	0	4.9e-05	0
CUFF.27996.4	chr24:59522131-59557157	-	22.2961	1e-05	0	0	0	0	0	0	1.8e-05	0
CUFF.28013.1	chr24:61444649-61447820	+	30.1315	16.2141	7.20678	3.63462	7.71204	8.84653	3.47011	3.87266	3.28726	4.30844
CUFF.28008.1	chr24:61448770-61450870	+	0.521098	2.87547	0	0.234739	0.240604	0	0.095174	0.096501	0.031519	0.169998
CUFF.28128.2	chr25:2728435-2733290	-	2.58888	0.534398	0.561761	0.149444	0	0	0	0	0	0
CUFF.28173.1	chr25:3562349-3569193	-	3.39115	0.690867	0.310276	0	0.112831	0.137419	0.089244	0.054293	0.08876	0.171676
CUFF.28210.1	chr25:4132746-4133070	-	20.3025	0	0	0	0	0	0	0	0	0
CUFF.28232.1	chr25:6804771-6809563	-	10.816	0	0	0	0	0	0	0	0	0
CUFF.28232.2	chr25:6806702-6809563	-	2.22473	0	0	0	0	0	0	0	0	0
CUFF.28318.1	chr25:10562413-10563706	-	8.85588	0	0	0	0	0	0	0	0	0
CUFF.28336.1	chr25:11366659-11373130	+	3.53554	0.034879	0	0	0	0	0	0	0	0.026251
CUFF.28345.1	chr25:11412361-11425979	-	20.7893	0	0	0	0	0	0	0	0	0
CUFF.28345.2	chr25:11419385-11425979	-	7.66658	0	0	0	0	0	0	0	0	0
CUFF.28416.1	chr25:14424261-14425923	-	7.36252	0	0	0	0	0	0	0	0	0
CUFF.28531.1	chr25:21490536-21491677	+	186.004	22.0236	14.6888	40.7422	22.105	7.74196	20.4867	18.4896	14.8859	8.17013
CUFF.28546.1	chr25:22301161-22303898	-	4.64474	0	0	0	0	0	0	0	0	0
CUFF.28678.1	chr25:27250525-27291750	+	1.53349	0.293991	0.352184	0	0.142289	0	0.180085	0.078744	0.067139	0.088024
CUFF.28790.1	chr25:30744997-30782894	+	4.21002	0	0	0	0	0	0.17374	0	0	0
CUFF.28825.1	chr25:33560184-33565016	-	1.51068	0	0	0	0	0	0	0	0	0.090208
CUFF.28825.2	chr25:33560184-33565016	-	1.8764	0	0	0	0	0	0	0	0	0.000676
CUFF.29015.2	chr25:37715530-37729644	+	5.90045	0	0	0	0	0.23234	4.22489	0	0	0
CUFF.29093.1	chr25:39133078-39144246	-	1.46431	0.434529	0	0.077644	0	0	0.083949	0.051071	0	0
CUFF.29133.1	chr25:40261023-40261431	+	17.3358	0	0	0	0	0	0	0	0	0
CUFF.29133.2	chr25:40261023-40261431	+	8.89167	0	0.278608	0	0	0	0	0	0	0
CUFF.29136.1	chr25:40389162-40408758	+	1.36785	0	0	0	0	0	0	0	0	0
CUFF.29225.1	chr26:1075896-1079701	+	1.04126	0.225135	0.206252	0	0	0.057092	0.148309	0.045113	0	0.072132
CUFF.29230.1	chr26:3774386-3777216	+	29.5833	0	0	0	0	0	0	0	0	0
CUFF.29275.3	chr26:8590584-8603256	-	6.26338	0.014539	0.022817	0	0.020738	0.076364	0.032814	0	0.016115	0.02223
CUFF.29275.1	chr26:8590584-8604881	-	3.26112	3e-05	1.6e-05	0	1.5e-05	1.1e-05	2.3e-05	0	3.3e-05	1.7e-05
CUFF.29275.2	chr26:8590584-8604881	-	5.9324	0.000302	0.000243	0	0.000221	0.00029	0.000349	0	0.00033	0.000246
CUFF.29284.2	chr26:8849312-9036283	-	12.7568	12.0595	14.8852	9.34457	14.4815	11.9374	36.1118	7.3636	11.8416	13.6176
CUFF.29357.1	chr26:13248924-13252205	+	24.3246	0	0	0	0	0.347588	0	0	0	0
CUFF.29407.1	chr26:14509931-14586215	+	3.93116	0	0	0	0	0	0	0	0	0
CUFF.29457.2	chr26:17321117-17322829	+	4.1393	5.12532	1.46762	0.467936	0.119273	0.233708	0.391351	0.176744	0	0.578779
CUFF.29457.1	chr26:17321117-17335573	+	1.90458	0.490311	0.009838	3e-06	0.008583	4e-06	0.013272	0.007858	0	3.8e-05
CUFF.29515.1	chr26:18850971-18858180	-	9.35726	0	0	0	0.008672	0	0	0	0	3.02375
CUFF.29515.2	chr26:18850971-18858180	-	3.15071	0	0	0	0.008523	0	0	0	0	0.000259
CUFF.29588.1	chr26:21753276-21758477	-	2.70621	0.188972	0.386581	0	0	0.085607	0.166787	0.27058	0.110633	0.140311
CUFF.29696.1	chr26:25387698-25437297	+	75.0854	2.78173	0	0	0	0.275079	0	0	0	0
CUFF.29696.2	chr26:25387701-25437297	+	17.1523	6.5e-05	0	0	0	6.7e-05	0	0	0	0
CUFF.29715.1	chr26:26404899-26484992	+	8.63126	0	0	0	0	0	0	0	0	0
CUFF.29790.1	chr26:31162812-31166208	+	1.9599	1e-06	0	0.077166	0.079276	0	0	0	0	0.250769
CUFF.29790.2	chr26:31162815-31166208	+	0.592842	0.144333	0	0.000496	0.000335	0	0	0	0	0.000362
CUFF.29795.1	chr26:31432516-31434771	-	4.29789	0	0	0	0	0	0	0	0	0
CUFF.29801.1	chr26:31683153-31685083	+	6.04061	0	0	0	0	0	0	0	0	0
CUFF.29815.1	chr26:31934437-31935894	+	6.53645	0	0	0	0	0.021332	0	0	0	0.01215
CUFF.29835.1	chr26:32708014-32715561	-	2.85577	0	0	0	0	0	0	0	0	0.09492
CUFF.29865.1	chr26:33745152-33747356	-	2.33787	0	0	0	0	0	0	0	0	0
CUFF.29858.1	chr26:33958787-33959517	+	10.7314	0.419052	0	0.247546	0	0	0	0	0	0
CUFF.29972.1	chr26:38410440-38412294	+	10.2619	1.88919	0	0.358282	0	0	0	0	0	0
CUFF.29992.1	chr26:39527482-39535797	-	1.20618	0.076098	0	0	0	0	0	0	0	0
CUFF.29992.2	chr26:39527482-39535797	-	6.99547	0.00434	0	0	0	0	0	0	0	0
CUFF.30110.1	chr26:45459178-45490118	-	2.81374	3.93582	0	0.179141	0	0	0	0.117832	0	0
CUFF.30231.1	chr27:1461840-1462766	+	4.85463	0	0.0858	0	0	0	0	0	0	0
CUFF.30234.1	chr27:1537744-1538794	-	2.97673	0	0	0	0	0	0	0	0	0
CUFF.30235.1	chr27:2624230-2667771	-	1.7347	0	0	0	0	0.117068	0	0	0	0
CUFF.30242.1	chr27:3897208-3969859	-	1.41	0.687036	0.210191	0.111834	0.076427	0.046546	0.060457	0	0.050081	0.37632
CUFF.30286.1	chr27:6802476-6820012	-	12.0719	0	0	0	0.015243	0	0	0	0	0
CUFF.30287.1	chr27:6819423-6832103	+	6.32967	0	0	0	0	0	0	0	0	0
CUFF.30291.1	chr27:8271911-8424773	-	4.58307	0	0	0	0	0	0	0	0	0
CUFF.30297.1	chr27:10830882-10978973	+	17.8972	0	0	0	2.56567	0	0	0	0	0
CUFF.30365.1	chr27:14066251-14067049	-	3.51469	0	0	0	0	0	0	0	0	0
CUFF.30425.1	chr27:15710419-15718815	+	0.736092	0	0	0	0	0	0	0	0	0
CUFF.30429.1	chr27:15822748-15824157	-	5.18819	0	0	0	0	0	0	0	0	0
CUFF.30430.1	chr27:15823404-15859465	+	28.3317	0	0	0	0	0	0	0	0	0
CUFF.30438.1	chr27:15888760-15933449	+	3.65293	0	0	0	0	0	0	0	0	0
CUFF.30476.1	chr27:17736201-17784629	-	2.44765	0.043712	0	0	0	0	0	0	0	0
CUFF.30477.1	chr27:17783541-17788124	+	4.48054	1e-06	0	0	0	0	0.029684	0	0	0
CUFF.30477.2	chr27:17783917-17788124	+	10.467	1.49598	0	0.049262	0	0	2e-06	0	0	0
CUFF.30527.1	chr27:20062584-20146590	+	54.791	0	0	0	0	0	0	0	0	0
CUFF.30527.2	chr27:20062584-20146590	+	7.66183	0	0	0	0	0	0	0	0	0
CUFF.30527.3	chr27:20062584-20146590	+	20.1342	0	0	0	0	0	0	0	0	0
CUFF.30530.1	chr27:20236596-20242647	+	1.04096	0	0	0	0	0	0	0	0	0
CUFF.30597.1	chr27:23981197-23989025	-	7.56274	0.512532	4.5462	0.474282	7.37301	0.518174	8.33284	1.94977	4.52153	7.49016
CUFF.30599.1	chr27:24107520-24112212	+	3.42448	0	0	0	0	0	0.728399	0	0	0
CUFF.30608.1	chr27:24626979-24632546	-	30.2224	5.20049	0	0	0	0	0	0	0	0
CUFF.30668.1	chr27:26712340-26714932	-	2.63291	0	0	0	0	0	0	0	0	0
CUFF.30678.1	chr27:27913839-27916177	-	6.8467	0.000189	0	0	0	0	0	0	0	0
CUFF.30678.2	chr27:27913839-27916177	-	7.23976	0.050041	0	0	0	0	0	0	0	0
CUFF.30680.1	chr27:27915480-27915965	+	21.2181	0	0	0	0	0	0	0	0	0
CUFF.30689.1	chr27:29580070-29581628	+	2.93696	0	0	0	0	0	0	0	0	0
CUFF.30695.1	chr27:30175378-30178115	+	1.60176	0.078596	0	0	0	0	0	0	0	0
CUFF.30695.2	chr27:30176345-30178115	+	1.50816	0	0	0	0	0	0	0	0	0
CUFF.30786.1	chr27:31076069-31109838	-	45.6803	0.046152	0	0	0	0	0	0	0	0
CUFF.30862.1	chr27:37678932-37679994	-	4.26606	0	0	0	0.055511	0	0	0	0	0
CUFF.30877.1	chr27:39703815-39707016	-	1.59681	0.23579	0	0.041205	0	0	0	0	0	0
CUFF.30882.1	chr27:39819619-39854157	-	19.4378	0.021979	0	0.022783	0.031136	0	0	0.044957	0	0.016591
CUFF.30905.1	chr27:40854876-40856326	+	1.41575	0	0	0	0	0	0	0	0	0
CUFF.30916.1	chr27:42195461-42197349	+	5.15451	0	0	0	0	0	0	0	0	0
CUFF.30918.1	chr27:42297550-42303736	+	9.95995	0	0	0	0	0	0	0	0	0
CUFF.30932.1	chr27:43384853-43415301	+	3.69098	0	0	0	0	0	0	0	0	0
CUFF.30949.1	chr28:525438-527006	+	3.17854	0.199917	0.082104	0.10921	0.1493	0	0.35423	0.215501	0.117499	0.148254
CUFF.31037.1	chr28:7436552-7438636	-	3.01964	4.74454	0.914078	0.486341	0.16631	0	0.262915	0	0.786984	0
CUFF.31129.1	chr28:12248934-12621053	+	2.8569	2.28843	0	0.209297	0.286082	0	0.528011	0	2.85006	5.32666
CUFF.31163.1	chr28:14470597-14471929	-	2.4349	1.78609	0	0	0	0	1.11588	0	0	2.21348
CUFF.31180.1	chr28:15305308-15342093	-	5.79044	0.654916	0	0	0.286575	0	0.07556	0	0	0
CUFF.31183.2	chr28:15416533-15422766	-	14.5303	0.186622	0	0.066234	0.226331	0	0	0	0	0
CUFF.31183.1	chr28:15416533-15423407	-	13.2209	0	0	0	0	0	0	0	0	0
CUFF.31269.1	chr28:15691993-15692937	-	1.3721	0	0.367841	0	0	0	0	0	0	0
CUFF.31195.2	chr28:15720198-15742845	+	2.75266	0.40018	0	0.234848	0	0	0	0	0	0
CUFF.31202.3	chr28:16272297-16346944	-	20.91	3e-06	0	0	0	0	0.138164	0	4e-06	0
CUFF.31202.4	chr28:16298080-16346944	-	31.773	0.209521	0	0	0	0	0	0	0.267064	0
CUFF.31229.1	chr28:17591926-17606089	-	6.85509	0	0	0	0	0	0	0	0	0
CUFF.31229.3	chr28:17618479-17660547	-	3.79911	0	0	0	0.001223	0	0	0	0	0.001436
CUFF.31229.2	chr28:17618479-17660553	-	3.9244	0	0	0	0.104682	0	0	0	0	0.052481
CUFF.31229.4	chr28:17654421-17660547	-	1.43246	0	0	0	0	0	0	0	0	0
CUFF.31227.1	chr28:17661461-17663214	+	14.1535	0	0	0	0	0	0	0	0	0
CUFF.31235.1	chr28:17992696-17999680	-	2.98774	0	0.293765	0	0	0	0	0	0	0
CUFF.31331.3	chr28:24901261-24904279	-	6.13151	26.8421	0.652479	3.9055	0.494442	0.48163	2.1895	1.61744	0.311475	0.859699
CUFF.31414.1	chr28:27231799-27233216	+	3.61084	0	0	0	0	0	0	0	0	0
CUFF.31501.2	chr28:29873442-29875306	-	12.0776	9.86953	11.3118	2.03328	8.7594	1.86179	3.95707	4.54719	5.6985	3.34208
CUFF.31530.1	chr28:31338729-31347670	+	6.98843	2.96917	1.36329	0.151115	1.03312	0	0.816921	0	0	0.198603
CUFF.31530.2	chr28:31338729-31347670	+	11.1331	0	0	0	0	0	0	0	0	0.097375
CUFF.31544.1	chr28:32676155-32685000	+	2.73009	0	0	0.112856	0	0	0	0	0	0
CUFF.31620.1	chr28:35458311-35478842	+	3.3167	0	0	0	0	0.24209	0	0	0	0
CUFF.31620.2	chr28:35458311-35478842	+	11.1485	0	0	0	0	0	0	0	0	0
CUFF.31768.1	chr28:46080338-46083463	+	11.3561	8.05069	0	0.569593	0.194811	1.42241	0	0	0	3.74965
CUFF.31840.1	chr3:3672607-3673292	+	3.09564	0	0	0	0	0	0	0	0	0
CUFF.32123.1	chr3:16023343-16025557	+	6.80004	0	0	0	0	0	0	0	0	0
CUFF.32198.1	chr3:18719787-18720262	-	10.1597	0	0	0	0	0	0	0.294645	0	0
CUFF.32201.2	chr3:18864160-18866946	-	1.97532	0.133183	0.374711	0.071002	0.097194	1.21539	2.31032	0	0	0.049657
CUFF.32201.1	chr3:18864160-18867238	-	3.52052	0.00021	0.000165	0.000221	0.000167	0.000199	0.000259	0	0	0.000173
CUFF.32316.1	chr3:20982264-20988839	+	2.71992	0.000222	0	0.009416	0.206604	0.377351	0.326742	0.496966	0	0.837343
CUFF.32316.2	chr3:20982264-20988839	+	3.89008	3.03563	0	0.588348	1.5e-05	1.5e-05	2.1e-05	1.5e-05	0	0.286308
CUFF.32430.2	chr3:23996453-23999170	-	3.56389	3e-06	0	0	0	0	0	0	0	0
CUFF.32430.1	chr3:23996453-24025084	-	5.5519	0.162161	0	0	0	0	0	0	0	0
CUFF.32450.1	chr3:24750584-24753581	-	8.049	1.2925	0	0	0	0	0	0	0	0
CUFF.32574.1	chr3:29168461-29171031	+	5.24742	0.033355	0	0	0	0	0	0.022914	0	0
CUFF.32580.1	chr3:29414546-29418979	-	2.40345	0	0	0	0	0	0	0	0	0
CUFF.32580.2	chr3:29414546-29424408	-	5.71689	0	0	0	0	0	0	0	0	0
CUFF.32620.1	chr3:30587595-30589580	+	1.80533	0	0	0	0	0	0	0	0	0
CUFF.32670.2	chr3:31830865-31843693	+	12.4993	2.62365	0	1.35769	0.857368	0	0.026588	0.244012	0.678336	0.562026
CUFF.32670.1	chr3:31830865-31844889	+	1.90755	2.39898	0.38852	0.194616	0.898441	0.334586	0.178815	0.158392	0.798349	0.148898
CUFF.32698.1	chr3:33456157-33458550	+	1.30723	0	0	0	0	0	0	0	0	0
CUFF.32698.2	chr3:33456267-33458550	+	2.13557	0	0	0	0	0	0	0	0	0
CUFF.32869.1	chr3:43450343-43453354	+	2.89048	0.373168	0.155893	0	0.283514	0	0.523124	0.090928	0	0.09174
CUFF.32895.1	chr3:47542197-47544461	+	2.7044	0	0	0	0	0	0	0	0	0
CUFF.32897.1	chr3:48423837-48428320	-	6.84933	0	0	0	0	0	0	0	0	0
CUFF.32920.1	chr3:48887600-48890389	+	2.07606	0.031278	0	0	0.022292	0.081466	0.141085	0.021458	0	0
CUFF.33081.1	chr3:55796796-55800912	+	14.415	0.034365	0	0.035915	0	0	0	0.011812	0	0
CUFF.33089.1	chr3:56831831-56832795	+	1.46438	0	0	0	0	0	0	0	0	0
CUFF.33092.1	chr3:56853760-56857087	+	1.9055	0.252774	0.068464	0	0.311218	0.227416	0.196921	0.778698	0.097943	0.313531
CUFF.33097.1	chr3:57039973-57040937	-	5.30398	0	0	0	0	0	0	0	0	0
CUFF.33102.1	chr3:57079037-57081404	-	5.55382	0	0	0	0	0	0	0	0	0
CUFF.33124.1	chr3:58133127-58135228	+	22.6882	0	0	0	0	0	0	0	0	0
CUFF.33198.1	chr3:65765694-65771293	+	4.05478	0	0	0	0	0	0	0	0	0
CUFF.33200.1	chr3:66729562-66730480	+	8.53981	0	0	0	0	0	0	0	0	0
CUFF.33203.1	chr3:66954760-66958778	-	4.87594	4.20617	0.355387	1.26057	0.107729	0.26233	0	0.310933	0	0.618232
CUFF.33237.1	chr3:69918501-69922712	+	2.27284	0	0	0	0	0	0	0	0	0
CUFF.33237.2	chr3:69918501-69922712	+	1.95722	0	0	3.1e-05	0	0	0	0	0	0
CUFF.33237.3	chr3:69918501-69922712	+	2.828	0	0	0.249666	0	0	0	0	0	0
CUFF.33237.4	chr3:69918501-69922712	+	3.63341	0	0	0.236955	0	0	0	0	0	0
CUFF.33298.1	chr3:76502409-76505799	+	11.8496	0.015554	0	0	0.010971	0	0	0	0	0
CUFF.33341.1	chr3:78734797-78735331	-	3.9093	0	3.26184	0.642771	1.42824	0.133763	0.8687	0.211394	0.692271	1.04832
CUFF.33404.1	chr3:84062837-84084674	-	1.2307	0	0	0.001356	0.600084	0.001035	0.001151	0.000693	0	0.000869
CUFF.33404.2	chr3:84062837-84084674	-	1.83311	0	0	0.128429	5.9e-05	0.215079	0.279557	0.084682	0	0.085824
CUFF.33405.1	chr3:84086111-84087211	+	1.39757	0	0	0	0	0	0	0	0	0
CUFF.33432.1	chr3:85636017-85646609	+	2.79887	0.083123	0	0	0	0	0	0	0.046895	0
CUFF.33465.1	chr3:87661948-87665175	-	9.94341	0	0	0	0	0	0	0	0	0
CUFF.33480.1	chr3:88249591-88250362	-	3.7853	0	0	0	0	0	0	0	0	0
CUFF.33487.1	chr3:88758243-88783874	+	3.17652	0.100864	0	0	0.072813	0	0	0	0	0.718614
CUFF.33494.1	chr3:88857297-88860783	-	4.48009	0	0	0	0	0	0	0	0	0
CUFF.33489.1	chr3:89082415-89085390	-	4.83861	0.402194	0	0	0	0	0	0	0	0
CUFF.33512.2	chr3:89703761-89713162	+	21.4887	0.208893	0	0	2.18922	1.47122	1.07489	0.217975	5.40173	8.26049
CUFF.33517.1	chr3:90341726-90397669	+	2.57011	0	0	0	0	0	0	0	0	0
CUFF.33517.2	chr3:90342247-90397669	+	3.82112	0	0	0	0	0	0	0	0	0
CUFF.33517.3	chr3:90344195-90414447	+	2.5669	0	0	0	0	0	0	0	0	0
CUFF.33517.4	chr3:90395939-90397669	+	4.8487	0	0	0	0	0	0	0	0	0
CUFF.33536.2	chr3:91173539-91175016	-	1.24895	0	0	0	0	0	0	0	0	0
CUFF.33536.1	chr3:91173539-91175019	-	4.78551	0	0	0	0	0	0	0	0	0
CUFF.33542.1	chr3:91360874-91363177	+	12.667	0	0	1.16961	0	0	0	0	0	0
CUFF.33545.1	chr3:91626976-91630573	-	13.4352	0	0	0	0	0	0	0	0	0
CUFF.33830.1	chr3:101851365-101857918	+	0.949765	0.211621	1.5e-05	1.2e-05	0.065346	0.183245	0.466731	0.088138	2.1e-05	1.4e-05
CUFF.33830.2	chr3:101851365-101857918	+	6.79897	2.05134	0.103745	0.575057	0.100547	1.13747	0.20449	0.431976	0.148214	0.133966
CUFF.33926.1	chr3:106130413-106132198	-	7.38589	0	0	0	0	0	0.029347	0	0	0
CUFF.34035.1	chr3:109867838-109868621	+	6.94671	0	0	0	0	0	0	0	0	0
CUFF.34098.1	chr3:112339050-112423059	+	2.06495	0.098	0	0.051711	0	0	0	0	0	0.07352
CUFF.34174.1	chr3:117208234-117209115	+	3.1478	0	0	0	0	0	0	0	0	0.286566
CUFF.34412.4	chr4:13545391-13550137	-	20.7711	0.48539	0	0	0	0.112019	0.727486	0.17703	0	0
CUFF.34427.1	chr4:14730070-14767940	-	14.25	0	0	0	0	0	0	0	0	0
CUFF.34427.2	chr4:14730581-14767960	-	9.16376	0	0	0	0	0	0	0	0	0
CUFF.34515.1	chr4:20234522-20248454	+	7.76273	0	0	0	0	0	0.064172	0	0	0
CUFF.34529.1	chr4:20750181-20751829	+	1.83737	0.74102	0	0	0	0	0	0	0	0.061302
CUFF.34521.2	chr4:20829655-20831942	+	2.71092	1.63526	0	0.239717	0	0	0	0	0	0
CUFF.34546.2	chr4:23410820-23458723	-	1.342	0.052917	0	0	0.038265	0	0.121079	0	0	0
CUFF.34546.3	chr4:23410820-23458723	-	3.58285	2e-06	0.027218	0.036204	1e-06	0	1e-06	0	0.038895	0
CUFF.34652.1	chr4:28774898-28792384	-	17.2622	0	0.054024	0	0	0.023927	0.062155	0.003151	0	0.021081
CUFF.34657.1	chr4:30066688-30067068	-	24.9127	0	0	0	0	0	0	0	0	0
CUFF.34700.1	chr4:32047275-32049780	-	6.7221	0	0	0	0	0	0	0	0	0
CUFF.34750.1	chr4:35000501-35016171	-	1.45696	0	0	0	0	0	0	0	0	0
CUFF.34783.2	chr4:36260285-36432409	+	11.4922	0	0	0	0	0	0	0	0	0
CUFF.34783.1	chr4:36260285-36561321	+	8.08987	0	0	0	0	0	0	0	0.564414	0
CUFF.34803.1	chr4:37444316-37482409	+	2.23098	0	0	0	0	0	0	0	0	0
CUFF.34876.2	chr4:40898664-40966028	-	146.852	0	0	0	0	0	0	0	0	0
CUFF.34900.2	chr4:43426342-43427748	-	24.0458	0	0	0	0	0	0	0	0	0
CUFF.34900.1	chr4:43426342-43428319	-	3.51163	0	0	0	0	0	0	0	0	0
CUFF.34930.1	chr4:44599185-44601299	-	10.0941	1.21154	0	0.376864	0.25788	0	0	0	0	0
CUFF.34973.1	chr4:46919098-46919605	-	5.16879	0.261484	0	0	0	0.265585	0	0	0	0.374374
CUFF.35015.1	chr4:48368266-48411157	+	1.63728	0.236243	0.566109	0	0.042885	0	0	0.041275	0	0
CUFF.35122.1	chr4:53128603-53349093	+	5.33301	1.9e-05	0	0	0	0	0	0	9e-06	7e-06
CUFF.35122.2	chr4:53128603-53349093	+	18.2745	0.181014	0	0	0	0	0	0	0.225947	0.395722
CUFF.35134.2	chr4:53380877-53415423	+	2.3952	0	0	0	0	0	0	0	0	0
CUFF.35134.1	chr4:53380877-53582813	+	4.41707	0	0	0	0	0	0	0	0	0
CUFF.35151.1	chr4:53882189-53896467	-	10.0716	0.27684	0	0.072343	0.024718	0.03011	0	0	0	0
CUFF.35175.1	chr4:55728279-55736971	-	1.62914	0	0	0.111373	0	0	0	0	0	0
CUFF.35244.1	chr4:60150329-60169844	+	1.63154	0.141487	0	0	0	0	0	0	0	0
CUFF.35244.2	chr4:60152595-60157802	+	2.85784	0	0	0	0.121947	0	0	0	0	0
CUFF.35319.1	chr4:66175672-66176411	-	5.53897	0	0	0	0	0	0	0	0	0
CUFF.35338.1	chr4:66598458-66602684	-	1.71303	0.123264	0.016214	0	0.014738	0.035905	0.093271	0	0	0.03088
CUFF.35370.1	chr4:68234587-68238502	+	2.88277	0.037128	0	0	0	0	0	0	0	0
CUFF.35370.2	chr4:68234587-68238502	+	6.73179	1e-06	0	0	0	0	0	0	0	0
CUFF.35369.1	chr4:68234647-68236749	-	4.82607	0	0	0	0	0	0	0	0	0
CUFF.35384.1	chr4:69052058-69055810	+	0.931057	0	0	0.173738	0	0	0	0.190463	0.062244	0
CUFF.35406.1	chr4:69948948-69988369	-	11.6459	0	0	0	0	0	0	0	0	0
CUFF.35416.1	chr4:70302343-70342883	-	4.28877	1.2e-05	0	0	0	0	0	0	1.5e-05	0
CUFF.35416.2	chr4:70302343-70342883	-	27.1754	0.123599	0	0	0	0	0	0	0.443406	0
CUFF.35421.2	chr4:70502790-70504404	-	3.6729	0	0	0	0	0	0	0	0	0
CUFF.35421.1	chr4:70502790-70504412	-	18.0088	0	0	0	0	0	0	0	0	0
CUFF.35423.1	chr4:70614982-70617885	-	1.79796	0	0	0	0	0	0	0	0	0
CUFF.35455.1	chr4:71951776-71954421	-	4.93772	0	0	0	0	0	0.055839	0	0	0.110146
CUFF.35502.1	chr4:72212446-72216019	+	152.164	0.01352	0	0	0	0	0	0	0	0
CUFF.35490.1	chr4:72275835-72289214	-	3.09462	20.1072	0	1.15444	0	0	0	0	0	0
CUFF.35526.1	chr4:73920419-73927666	+	6.38076	0	0	0	0	0	0	0	0	0
CUFF.35573.1	chr4:77313335-77314307	+	31.7694	84.6103	65.0734	14.3007	34.5524	20.0491	11.3929	9.90149	54.8896	57.5788
CUFF.35647.1	chr4:80384816-80386418	+	2.34784	0	0	0	0	0.130154	0	0	0	0
CUFF.35647.2	chr4:80384865-80391857	+	4.98306	0	0	0	0	0	0	0	0	0
CUFF.35652.1	chr4:80748576-80755699	+	6.89981	0	0	0	0	0	0	0	0	0
CUFF.35676.1	chr4:83006230-83015829	-	10.5848	0	0	0	0	0	0	0	0	0
CUFF.35692.1	chr4:84639220-84649758	+	3.14265	0	0	0	0	0	0	0	0	0
CUFF.35692.2	chr4:84640069-84649758	+	2.80074	0	0	0	0	0	0	0	0	0
CUFF.35784.3	chr4:93206709-93210937	-	2.23215	0	0.027438	0.054745	0.06235	0	0.03946	0	0	0
CUFF.35835.1	chr4:94396196-94398337	-	1.75755	0	0	0	0	0	0	0	0	0
CUFF.35837.1	chr4:94568779-94569552	+	6.05086	0.688711	0	0	0	0	0	0	0	0
CUFF.35873.1	chr4:95377684-95394561	-	2.30831	0.09202	0	0	0	0	0	0	0	0
CUFF.35873.2	chr4:95378234-95394561	-	0.985153	4.9e-05	0	0	0	0	0	0	0	0
CUFF.35954.1	chr4:98612496-98614198	-	10.1979	0.179569	0	0	0	0	0	0	0	0.066736
CUFF.36009.1	chr4:100435316-100438306	+	11.6811	0	0	0	0	0	0	0	0	0
CUFF.36009.2	chr4:100435316-100438306	+	9.84077	0	0	0	0	0	0	0	0	0
CUFF.36010.1	chr4:100437237-100440064	-	12.7308	0	0	0	0	0	0	0	0	0
CUFF.36011.1	chr4:100472341-100516540	+	5.93837	0.67087	0.142124	0.075618	0.36177	0.094418	0.081758	0.190664	0	0.509605
CUFF.36074.1	chr4:103301684-103303222	-	1.07036	1.03197	0.813698	2.53932	4.80754	0.069304	6.21113	1.99884	0.402546	9.39957
CUFF.36125.1	chr4:104056909-104058845	+	1.02527	0	0	0	0	0	0	0	0	0
CUFF.36125.2	chr4:104056909-104058845	+	1.84608	0	0	0	0	0	0	0	0	0
CUFF.36125.3	chr4:104057075-104058845	+	1.43228	0	0	0	0	0	0	0	0	0
CUFF.36169.1	chr4:105128661-105136038	+	3.35794	0.979021	0	0.171258	0	0	0	0	0	0.09198
CUFF.36215.1	chr4:105602675-105638706	+	2.18735	0	0	0	0	0	0	0	0	0
CUFF.36258.1	chr4:109695603-109755331	-	3.08454	0.07632	0	0	0	0	0	0	0	0
CUFF.36371.1	chr4:115223038-115223985	+	48.0041	0	0	0	0	0	0	0	0.309263	0
CUFF.36429.1	chr4:118822567-118859998	-	0.977694	0.7175	0	0.026627	0	0.554111	0	0	0	0.019327
CUFF.36457.1	chr4:119179301-119180349	-	7.97218	0	0	0	0	0	0	0	0	0
CUFF.36520.1	chr5:1362218-1396019	+	52.4432	3.97824	12.6438	7.14765	7.10252	6.91787	8.11488	4.88384	3.83258	9.53087
CUFF.36550.1	chr5:5344755-5428875	-	7.33925	0.094058	0	0	0.022346	0	0.070713	0	0.03513	0.023616
CUFF.36550.2	chr5:5396566-5428875	-	5.84317	0.068309	0	0	0	0	0	0	0	0
CUFF.36558.4	chr5:6296664-6346810	+	2.4879	0.208242	0	0	0	0	0	0	0	0
CUFF.36558.3	chr5:6296664-6360675	+	6.37962	0	0	0	0	0	0	0	0	0
CUFF.36567.1	chr5:6548204-6549969	+	2.57328	0	0	0	0	0	0	0	0	0
CUFF.36579.1	chr5:6778052-6947452	+	15.095	0.650813	0	0	3.5e-05	0	0	0	0	0.930952
CUFF.36582.1	chr5:6783623-6855911	+	20.8073	0	0	0	0	0	0	0	0.483935	0
CUFF.36579.2	chr5:6943815-6947452	+	112.019	0.922279	0	0	0.432557	0	0	0	0	3.87209
CUFF.36605.1	chr5:8789706-8825762	-	7.39637	0.914708	0	0	0	0	0.295859	0	0	0
CUFF.36654.1	chr5:10311401-10316825	-	36.1879	0	0.02006	1.42754	0	0	0	0	0	0.019586
CUFF.36646.1	chr5:10317152-10318230	+	13.5772	0.061724	0	0	0	0	0.071032	0	0	0
CUFF.36672.1	chr5:12773412-12773819	+	23.7091	0	0	0	0	0	0	0	0	0
CUFF.36679.1	chr5:13003099-13008596	-	0.800727	0	0	0	0	0	0	0	0	0
CUFF.36680.1	chr5:13007774-13079479	+	22.9931	0	0	0	0	0	0	0	0	0
CUFF.36796.1	chr5:23893399-23894536	+	2.59722	0	0	0	0	0	0	0	0	0
CUFF.36799.1	chr5:23919723-23920141	-	6.49667	0	0	0	0	0	0	0	0	0
CUFF.36888.1	chr5:26394149-26456115	-	4.46545	0	0	0	0	0	0	0	0	0
CUFF.37281.1	chr5:46757640-46766915	+	1.84907	16.918	5.05671	4.00163	1.86215	2.26793	9.57362	6.04825	3.75393	2.65069
CUFF.37285.1	chr5:46995867-46999256	-	2.81968	0	0	0	0	0	0	0	0	0
CUFF.37287.1	chr5:47075378-47076085	-	8.02941	0	0	0	0	0	0	0	0	0
CUFF.37368.1	chr5:50776614-50778142	+	5.58569	0	0	0	0	0	0	0	0	0
CUFF.37372.1	chr5:50860229-50860632	-	9.1878	0	0	0	0.276412	0	0	0	0	0
CUFF.37417.1	chr5:52461768-52474002	+	9.66523	0	0.024636	0	0.002132	0	0	0	0	0.006896
CUFF.37568.1	chr5:57518323-57520992	+	4.75763	5.83873	0.081229	1.18851	1.62479	0.089939	0.116819	0.213205	0.116244	0.073405
CUFF.37644.1	chr5:63858484-63879846	+	2.2623	0	0	0	0	0	0	0	0	0
CUFF.37668.3	chr5:64821302-64824314	+	31.785	0.562305	0.155799	0	0.141612	0.230007	0	0.022718	0.296842	0.174333
CUFF.37820.1	chr5:74096448-74097174	-	2.95452	0.897845	0.366158	0.097408	0.06658	0	0.105317	0	0	0
CUFF.37883.1	chr5:78549007-78551893	-	25.2103	2.62937	0	0	1.76697	1.07166	1.39194	0	0	0
CUFF.37959.1	chr5:84733418-84750591	+	5.41288	0.142726	0	0.160693	0	0	0.34748	0	0	0
CUFF.37996.1	chr5:87962458-87964268	-	5.29114	3.51366	4.80619	2.5115	12.1791	22.4266	31.8445	6.00714	0.984934	40.1299
CUFF.38112.1	chr5:97584116-97584769	+	7.25182	0	1.24076	0	0	0	0	0	0	0.879666
CUFF.38150.1	chr5:98635913-98697897	-	1.84069	0	0	0	0	0	0	0	0.218081	0
CUFF.38305.1	chr5:107856719-107860500	-	2.95389	0	0	0	0	0	0	0	0	0
CUFF.38641.1	chr6:5092271-5093148	+	8.56109	0	0	0	0	0	0	0	0	0
CUFF.38766.1	chr6:13622813-13664994	-	3.61984	0.092843	0	0	0	0	0.846024	0.032168	0.052554	1.98623
CUFF.38834.1	chr6:16632824-16648134	-	8.79671	0	0	0	0	0	0	0	0	0
CUFF.38868.1	chr6:18150391-18152157	+	10.613	0	0	0	0	0	0	0	0	0
CUFF.38896.1	chr6:18904248-19118367	+	24.4183	0	0	0	0	0	0	0	0	0.070756
CUFF.38936.1	chr6:19973308-19974564	-	6.13168	0.105259	0	0	1.73581	0	0	0	0	0
CUFF.38974.1	chr6:21116236-21120206	+	58.8015	4.8e-05	0	0	0	0	0	0	0	0
CUFF.38974.2	chr6:21116236-21122574	+	29.511	0.452672	0	0	0	0	0	0	0	0
CUFF.39005.1	chr6:21859972-21917286	-	13.1699	0	0	0	0	0	0	0	0	0.049674
CUFF.39042.1	chr6:23681131-23684633	-	8.07838	0.242695	0	0	0	0	0	0.531091	0	0
CUFF.39087.1	chr6:26569745-26573639	+	5.95956	0	0	0	0	0	0	0	0	0
CUFF.39125.1	chr6:27957623-27970490	-	5.13664	0	0	0	0.105526	0.064262	0.333874	0	0	0
CUFF.39125.2	chr6:27958636-27970490	-	3.14944	0	0	0	1e-06	1e-06	2e-06	0	0	0
CUFF.39120.1	chr6:28470120-28497405	-	1.09009	0	0	0	0	0	0	0	0	0
CUFF.39166.1	chr6:31637681-31642203	-	1.92642	0.762997	0	0	0	0	0	0	0	0
CUFF.39174.1	chr6:34018301-34051641	+	3.20238	0	0	0	0	0	0	0	0	0
CUFF.39315.1	chr6:38608855-38611468	-	14.8227	0	0	0	0	0	0	0	0	0
CUFF.39321.1	chr6:38755168-38765614	-	2.40593	2.87191	4.70143	0.893367	4.58209	0.185913	4.34657	3.52572	2.64927	5.707
CUFF.39394.1	chr6:45938771-45940128	+	2.78389	0.068663	0	0	0.100368	0	0	0.096596	0	0
CUFF.39456.3	chr6:51316474-51396578	-	13.4032	0	0.285952	0	0	0.518097	0	0	0	0
CUFF.39456.2	chr6:51316474-51405964	-	34.9612	0	0	0	0	0	0	0	0	0
CUFF.39446.1	chr6:53894932-53899324	+	2.65427	0.654103	3.15384	5.03406	2.70378	3.79134	4.92443	1.34025	8.38392	0.806803
CUFF.39490.1	chr6:58417118-58448940	-	22.0592	1.03082	0	0.128173	0	0	0	0	0	0.085719
CUFF.39490.2	chr6:58417118-58448940	-	4.291	0.193458	0	1.5e-05	0	0	0	0	0	1.1e-05
CUFF.39500.1	chr6:59219927-59267699	+	1.89565	0	0.690841	0.091892	0.690887	0	0.099353	0.060443	0.691825	0.252931
CUFF.39513.1	chr6:59883035-59883767	-	3.94284	0	0	0	0	0.991004	0	0	0	0
CUFF.39599.1	chr6:62726673-62747440	+	11.7247	0.958622	0	0	0	0	0	0	0	0
CUFF.39621.1	chr6:65243368-65244963	+	2.10737	0	0	0	0	0	0	0	0	0
CUFF.39621.2	chr6:65243374-65244963	+	2.98753	0	0	0	0	0	0	0	0	0
CUFF.39638.1	chr6:65581854-65695382	-	22.6495	5.12346	0	0.376087	0	0	0	0	0	0
CUFF.39667.1	chr6:68401528-68403100	+	2.5516	0	0	0	0	0	0	0	0	0
CUFF.39693.2	chr6:69009215-69080368	-	4.10413	0.09562	0	0.208318	0.569578	0	0.225232	0.205537	2.01701	0.070979
CUFF.39693.3	chr6:69025297-69080368	-	0.821167	3e-06	0.051131	4e-06	4e-06	0	4e-06	2e-06	5e-06	2e-06
CUFF.39737.1	chr6:70025430-70026503	+	13.139	0	0	0	0	0	0	0	0	0
CUFF.39699.1	chr6:70030391-70033013	-	2.48604	0.138736	0	0.155757	0.319462	0.129654	0.673612	0.204901	0	0.611951
CUFF.39721.1	chr6:70892110-70898024	-	10.2931	0	0	0	0	0	0	0	0	0
CUFF.39721.2	chr6:70895560-70898024	-	10.0433	0	0	0	0.014693	0	0	0	0	0
CUFF.39749.1	chr6:72836663-72837494	-	15.4579	0	0	0	0.649988	0	1.02505	0	0	1.02608
CUFF.39822.1	chr6:80663310-80693748	-	1.36477	0	0	0	0	0	0.215817	0	0	0
CUFF.39826.1	chr6:84106860-84107239	-	13.7543	0	0	0	0	0	0	0	0	0
CUFF.39893.1	chr6:92296552-92296857	-	12.1475	4.67018	0	22.9355	3.31284	1.00483	1.30514	4.76401	0	13.9771
CUFF.39950.1	chr6:93795210-93811642	+	2.31698	0	0	0	0	0	0	0	0	0
CUFF.39958.1	chr6:94053450-94099289	-	10.1079	0	0	0	0	0	0	0	0	0
CUFF.39963.1	chr6:94336782-94337720	-	6.44103	0.769533	0.844144	1.79653	0.307149	0.373865	0.971199	2.51108	0.242169	0.139838
CUFF.39988.3	chr6:95636189-95637127	+	3.07358	0.515063	0	0	0	0	0.640329	0.129851	0	0.250673
CUFF.39999.2	chr6:95884783-95890825	+	6.32491	3.03197	0	0.589096	0	0	0	0	0	0
CUFF.40113.1	chr6:103902066-103904703	-	3.4758	0	0	0	0.122487	0	0	0	0	0
CUFF.40290.2	chr6:115667491-115672689	+	9.50315	21.1253	4.5446	7.87675	6.6383	1.70983	8.73267	3.49418	5.92123	5.9931
CUFF.40290.3	chr6:115667491-115672689	+	6.22508	0.448318	2.2e-05	5.3e-05	2.8e-05	0.814277	1.38818	1.4e-05	7.7e-05	1.7e-05
CUFF.40597.1	chr7:12570708-12574685	+	8.79051	0	0.127483	0.084785	0.115898	0.141153	0.091669	0.111536	0.182352	0.058675
CUFF.40659.1	chr7:13901076-13902599	-	5.14843	0.209425	0	0.177743	0	0	0	0	0	0
CUFF.40659.3	chr7:13901076-13902599	-	2.64736	5e-06	0	0	0	0	0	0	0	0
CUFF.40659.2	chr7:13901076-13902686	-	2.72499	0.196814	0	0	0	0	0	0	0	0
CUFF.40990.1	chr7:22142230-22143146	-	7.13306	2.17477	0	0	0	0	0	0	0	0
CUFF.41074.1	chr7:24744820-24820744	-	5.86302	0.588047	0	0	0	0	0	0	0	0.208975
CUFF.41165.1	chr7:27141413-27145482	+	338.83	0	0	0	0	0	0	0	0	0
CUFF.41125.2	chr7:28623436-28637725	+	3.15008	0	2.17097	0	0.151907	0	0.480332	0	0.23953	0
CUFF.41126.1	chr7:28627142-28627819	+	4.27022	0	0	0	0	0	0	0	0	0
CUFF.41132.1	chr7:29133618-29134346	-	4.42284	0	0	0	0	0	0	0	0	0
CUFF.41138.1	chr7:29772946-29801443	+	2.50549	0.64793	0	0.117285	0	0	0	0	0	0
CUFF.41169.1	chr7:30175207-30197182	+	9.98969	0	0	0	0.013115	0	0	0	0	0
CUFF.41169.2	chr7:30175207-30301396	+	3.89956	1.29581	0	0	0.034589	0	0	0	0	0
CUFF.41156.1	chr7:30640191-30641076	-	68.1403	0	0	0	0	0	0	0	0	0
CUFF.41159.1	chr7:30641230-30670843	+	3.61286	0.287319	0	0	0	0	0	0	0	0
CUFF.41159.2	chr7:30641230-30712545	+	0.92718	0	0	0	0	0	0	0	0	0
CUFF.41201.1	chr7:31186359-31312098	-	10.8988	4.53627	0	0.803446	0	0	0	0	0	0
CUFF.41203.1	chr7:31419888-31432935	-	2.75496	0	0	0	0.112086	0	0	0	0	0
CUFF.41220.1	chr7:31873502-31874889	-	14.936	0	0	0	0	0	0	0	0	0
CUFF.41238.1	chr7:32949569-32951011	-	7.9113	0	0	0	0.749595	0	0	0	0	0
CUFF.41248.1	chr7:33395845-33499276	+	17.6437	0.211078	0.174048	0.231508	0.158251	0.481778	0.125153	0.076138	0.186834	0.078168
CUFF.41257.1	chr7:33994352-34103687	-	5.46547	55.0607	0	6.49624	0	0	0	0	0	0
CUFF.41274.1	chr7:35162955-35225420	-	4.78715	0.052155	0	0	0	0	0	0	0	0
CUFF.41280.1	chr7:35379575-35387582	-	6.69476	0.071517	0.042182	0	0.076683	0	0.040443	0	0.020094	0.026907
CUFF.41300.1	chr7:36185372-36197213	-	2.0188	0.514546	0	0	0.211551	2e-06	0.103821	0.155515	0.103286	0.26344
CUFF.41300.2	chr7:36187966-36197213	-	2.50113	0.91411	0	0.239516	0.072711	0.149531	0.064741	0.178726	0	0
CUFF.41311.1	chr7:36403464-36420819	+	6.66164	0	0	0	0	0	0	0	0	0
CUFF.41318.1	chr7:36760809-36764263	+	3.99675	0	0	0	0	0	0	0	0	0
CUFF.41318.2	chr7:36760809-36832671	+	3.29129	0.122874	0	0	0	0	0	0	0	0
CUFF.41341.1	chr7:37678920-37965253	-	3.58865	0	0	0	0	0	0	1e-06	0	0
CUFF.41341.2	chr7:37678920-37965282	-	10.0739	0	0	0	0	0	0	0.811383	0	0
CUFF.41341.3	chr7:37708553-37965249	-	5.57101	0	0	0	0	0	0	0	0	0
CUFF.41341.4	chr7:37708553-37965253	-	1.79617	0	0	0	0	0	0	0	0	0
CUFF.41359.1	chr7:37899870-38014694	-	7.93916	0	0	0	0	0	0	0.874297	0	0
CUFF.41366.2	chr7:38564675-38577911	-	2.41254	0.028387	0.009597	0	0.008634	0	0.031675	0	0	0.009298
CUFF.41366.4	chr7:38564675-38577916	-	9.73286	0.005518	0.003529	0	0.003288	0	0.006199	0	0	0.003469
CUFF.41366.3	chr7:38564675-38578267	-	7.41144	3e-06	3.4e-05	0	3.7e-05	0	3e-06	0	0	3.6e-05
CUFF.41366.1	chr7:38564675-38579571	-	3.8305	0	0	0	0	0	0	0	0	0
CUFF.41336.1	chr7:38804366-38805620	-	10.9825	0.580739	0	0	0	0	0	0	0	0
CUFF.41425.1	chr7:40621351-40622803	+	0.780277	0.064726	0	0	0	0	0	0	0	0
CUFF.41425.2	chr7:40621594-40622803	+	4.75804	1.5e-05	0	0	0	0	0	0	0	0
CUFF.41446.1	chr7:41626454-41639295	+	26.6232	0	0	0	0	0	0	0	0	0.000171
CUFF.41446.2	chr7:41626672-41639295	+	3.26533	0	0	0	0	0	0	0	0	0.133188
CUFF.41551.1	chr7:46287424-46288786	-	4.38734	0	0	0	0	0	0	0	0	0
CUFF.41553.1	chr7:46289513-46292048	+	12.2278	0	0	0	0	0	0	0	0	0
CUFF.41579.1	chr7:46835563-46880243	-	16.2369	0.06607	0	0	0	0	0.044175	0	0	0.109942
CUFF.41581.1	chr7:47452429-47460871	+	3.5222	0.421259	0	0.249039	0.681308	0.207304	0.538518	0.327615	0	1.98241
CUFF.41643.1	chr7:49457648-49461926	+	51.3441	0	0	0	0	0	0	0	0	0
CUFF.41638.1	chr7:49658271-49688178	+	3.46254	0	0	0	0	0	0	0	0	0
CUFF.41641.1	chr7:49824405-49864806	+	1.44435	0.054147	0	0	0	0	0	0	0	0
CUFF.41860.1	chr7:54736585-54741549	+	1.6133	2.17797	0.508672	0.371657	0.625209	3.78387	1.94735	1.39155	0.215088	1.05207
CUFF.41870.1	chr7:55300959-55343390	+	3.43027	0.41127	0.220413	0.073295	0.250467	0.244048	0.633971	0.096421	0.236405	0.614332
CUFF.41873.1	chr7:55775674-55776260	-	9.57258	0	0	0	0	0	0	0	0	0
CUFF.41892.1	chr7:57101729-57143258	-	3.52683	1.19162	0	0	0	0	0	0	0	0
CUFF.41899.1	chr7:57252675-57253071	-	12.7655	0	0	0	0	0	0	0	0	0
CUFF.41910.1	chr7:57588093-57612285	+	10.9113	0.297279	0.119961	0.159565	0.245378	0.199236	0.646952	0.104955	0.085787	0.41576
CUFF.41923.1	chr7:57636443-57793754	+	14.8897	0	0	0	0	0	0	0	0	0
CUFF.42153.2	chr7:64817718-64838837	+	7.66543	0	0	0	0.097155	0.118298	0	0	0	0
CUFF.42169.1	chr7:65126262-65303060	+	1.8093	0	0	0	0	0	0	0	0	0
CUFF.42185.1	chr7:66433247-66436565	+	8.22053	0	0	0	0	0	0	0	0	0
CUFF.42185.2	chr7:66433264-66436565	+	6.26267	0	0	0	0	0	0	0	0	0
CUFF.42201.1	chr7:67112097-67213119	-	4.06686	0	0	0	0	0	0	0	0	0
CUFF.42233.1	chr7:67732352-67736682	-	6.06391	3.48698	4.28178	9.32104	13.46	4.56985	8.76059	13.1985	6.41558	4.30507
CUFF.42270.1	chr7:68350815-68358494	+	3.07438	0.073767	0	0	0	0	0	0	0	0.05503
CUFF.42271.1	chr7:68357848-68358691	-	3.57806	0	0	0	0	0	0	0	0	0
CUFF.42332.1	chr7:72017333-72338552	+	48.588	0.510611	0	0	0.401039	0	0.002177	0	0	0
CUFF.42332.2	chr7:72017333-72338552	+	30.7494	4.4e-05	0	0	3.3e-05	0	0.52358	0	0	0
CUFF.42391.2	chr7:74541867-74723947	-	5.95529	0	0	0	0	0	3.88213	0	0.463895	0
CUFF.42433.1	chr7:77683199-77849795	+	5.23519	0	0	0	0	0	0	0	0	0
CUFF.42440.1	chr7:78035146-78051516	-	4.81756	0	0	0	0	0	0	0	0	0
CUFF.42442.1	chr7:78202699-78203269	-	2.77988	0	0	0	0	0	0	0	0	0
CUFF.42445.1	chr7:78712612-78714497	+	16.7166	0	0.465592	0	0.323126	0	0	0	0	0
CUFF.42445.2	chr7:78712612-78714497	+	3.8883	0	8.2e-05	0	8.6e-05	0	0	0	0	0
CUFF.42445.3	chr7:78712612-78719197	+	3.09578	0	0	0	0.089876	0	0	0	0	0
CUFF.42448.1	chr7:79524605-79592700	+	2.24627	0	0	0	0	0	0	0	0	0
CUFF.42448.2	chr7:79524605-79711558	+	4.52735	0	0	0	0	0	0	0	0	0
CUFF.42471.3	chr7:82272546-82273041	+	21.0875	0	0	0	0	0	0	0	0	0
CUFF.42511.1	chr7:82642295-82644297	+	6.38452	0	0	0	0.05507	0	0.609819	0	0.346563	0
CUFF.42597.1	chr7:85942489-86015869	+	3.09094	0	0	0	0	0	0	0	0	0
CUFF.42647.1	chr7:90176216-90184487	+	8.22066	1.27569	0	0	0	0	0	0	0	0
CUFF.42652.1	chr7:90363040-90460753	-	14.9007	8.78107	0	0.868844	0	0	0	0	0	0.242078
CUFF.42666.2	chr7:92103981-92105761	-	17.5256	0	0	0	0	0	0	0	0	0
CUFF.42710.1	chr7:93889014-93987866	+	7.38985	0	3e-06	0	0	0	0	0	0	0
CUFF.42710.2	chr7:93889028-93906632	+	6.26126	0	0.410803	0	0	0	0	0	0	0
CUFF.42710.3	chr7:93982271-93987866	+	2.07107	0	0.046464	0	0	0	0	0	0	0
CUFF.42753.1	chr7:95210255-95211388	-	1.56912	14.2902	2.13596	2.17263	3.9408	0.417353	5.96292	0.384748	1.61746	25.0064
CUFF.42799.1	chr7:97805846-97808579	+	4.06793	0	0	0	0.026414	0	0.041792	0.050849	0	0
CUFF.42811.1	chr7:98207010-98413999	+	3.43598	0.390407	0.17165	0.228318	0.156143	0	0	0	0.246234	0.425405
CUFF.42824.1	chr7:98914000-98917235	-	4.25516	0	0	0	0	0	0	0	0	0
CUFF.42855.1	chr7:99569874-99645336	+	3.99981	0	0	0	0	0	0	0	0	0
CUFF.42862.1	chr7:100229055-100305611	+	4.9129	0	0	0	0	0	0	0	0	0
CUFF.42900.1	chr7:100851543-100956983	+	2.97059	0.08189	0	0.05783	0.118564	0.144416	0.062526	0.095096	0	0
CUFF.42896.1	chr7:101160123-101160965	+	4.6848	0	0	0	0	0	0	0	0	0
CUFF.42912.1	chr7:101371121-101473788	+	5.00105	0	0	0	0	0	0	0	0	0
CUFF.42925.1	chr7:103075262-103179467	+	8.64151	0	0	0	0	0	0	0	0	0
CUFF.42936.1	chr7:105045194-105174053	+	3.46855	12.6486	0	0.978451	0.334594	0.610859	1.32237	0.160896	0.263891	0
CUFF.42939.1	chr7:105179783-105183080	-	5.74449	0.10068	0	0.052292	0.023821	0	0.056538	0.051593	0.028084	0.018986
CUFF.42940.1	chr7:105200967-105205214	-	1.31231	0	0	0	0	0	0	0	0	0
CUFF.42941.1	chr7:105206413-105212362	+	11.3899	0	0	0	0	0	0	0	0	0
CUFF.42989.2	chr7:109940051-109943748	-	14.9848	0	0	0	0	0	0	0	0	0
CUFF.43028.2	chr7:111890884-111908666	+	10.585	7.40701	0	0.93258	0.033542	2.57403	0.477616	0	0	0
CUFF.43053.1	chr8:1241931-1245429	+	22.1836	0	0	0	0	0	0	0	0	0
CUFF.43064.1	chr8:1745310-1746455	+	3.8732	0.607869	0	0.094022	0	0	0.304967	0	0	0.516711
CUFF.43234.1	chr8:11688298-12043495	+	4.49371	0	0	0	0	0.138475	0.265949	0	0	0
CUFF.43234.2	chr8:11732611-11880879	+	6.51768	0.000448	0	0	0	0.000399	0.000512	0	0	0.000354
CUFF.43234.3	chr8:11817486-11880879	+	7.6471	0.050618	0	0	0	0.206281	0.228821	0	0	0.037937
CUFF.43235.1	chr8:12456838-12690239	+	5.53119	5.62761	0	0	0.251476	0	0	0	0	0.420828
CUFF.43261.1	chr8:13739902-13768375	+	27.5118	1.29341	0.073789	0.137409	0.040239	0.005447	0.031836	0.045191	0.021082	0.093162
CUFF.43255.1	chr8:13774340-13940618	+	4.88843	0	0	0	0	0	0	0	0	0
CUFF.43268.1	chr8:14789636-14861383	+	3.01616	0	0	0	0	0	0	0	0	1.78212
CUFF.43314.2	chr8:17903286-18025666	+	1.12472	0	0	0	0	0	0	0	0	0
CUFF.43314.1	chr8:17903286-18055905	+	0.745471	0	0	0	0	0	0	0	0	0
CUFF.43314.3	chr8:17904476-18272472	+	2.0859	0.143794	0	0	0	0	0	0	0	0
CUFF.43337.2	chr8:19070921-19161635	-	3.17727	1.96818	0	0.519958	0	0	0	0	0	0
CUFF.43354.1	chr8:19740642-19743444	-	6.02653	0	0	0	0	0	0	0	0	0
CUFF.43405.1	chr8:22843300-22874324	+	1.31773	2.81384	5.28877	3.85612	3.31184	3.16652	2.14095	2.74205	1.45602	9.03561
CUFF.43510.1	chr8:26051996-26107964	-	10.1742	0.327305	0	0	0	0	0.09546	4.76211	0.094953	0
CUFF.43527.1	chr8:27189865-27193802	+	4.25264	2.02535	0	0	0.132419	0.322404	0.209379	0	0	0.123285
CUFF.43529.1	chr8:28081184-28088966	-	1.29152	0	0.057493	0	0	0	0	0	0	0.159832
CUFF.43554.1	chr8:29300187-29301878	+	1.84332	0	0	0	0	0	0	0	0	0.084768
CUFF.43554.2	chr8:29300480-29301878	+	5.83928	0	0	0	0	0	0	0	0	0
CUFF.43612.1	chr8:30354775-30479863	+	44.2283	0.369634	0	0	0	0	0	0	0	0
CUFF.43679.1	chr8:34164385-34181113	+	5.57092	0	0	0	0	0	0	0	0	6e-06
CUFF.43679.2	chr8:34164385-34199760	+	8.46573	0	0.038827	0	0	0	0	0	0	2.4232
CUFF.43679.3	chr8:34164387-34181113	+	7.58314	0	0	0	0	0	0	0	0	0
CUFF.43708.1	chr8:36219953-36224264	-	2.2354	0	0	0	0	0	0.648022	0	0	0.261302
CUFF.43756.1	chr8:37368366-37407901	-	17.8946	1.40855	0	0	0	0	0	0	0	0
CUFF.43759.1	chr8:37812750-37835630	-	2.9326	0	0	0	0	0	0	0	0	0
CUFF.43827.1	chr8:40952162-40953676	-	0.875546	0	0	0	0	0	0	0	0	0
CUFF.43832.1	chr8:41003279-41058248	+	4.32889	0	0	0	0	0	0	0	0	0
CUFF.43842.1	chr8:41616093-41624072	+	114.868	48.5573	0	1.98029	0	0	0	0	0	0
CUFF.43852.1	chr8:41988670-42013416	+	21.2725	0.248779	0.311786	0	0.18901	0	0	0	0	0
CUFF.43882.1	chr8:43166222-43168595	-	3.32444	0	0	0.106907	0	0	0	0	0	0
CUFF.43883.1	chr8:43181599-43188530	-	2.40981	0	0	0	0	0	0	0	0	0
CUFF.43883.2	chr8:43181599-43189379	-	0.47993	0	0	0	0	0	0	0	0	0
CUFF.44058.1	chr8:52101124-52104475	+	33.5078	0.219846	0	0	0	0	0	0	0	0
CUFF.44059.1	chr8:52195428-52196200	-	2.30836	0	0	0	0	0	0	0	0	0
CUFF.44088.1	chr8:53439384-53441961	+	0.852436	0	0	0	4e-06	0	0	4e-06	0	0
CUFF.44088.2	chr8:53439764-53441961	+	2.94281	0	0	0	0.081446	0	0	0.07837	0	0
CUFF.44145.1	chr8:54549228-54643176	+	6.46161	0	0.014325	0	0.013022	0.07956	0	0	0.020469	0.01392
CUFF.44145.2	chr8:54549229-54643176	+	4.49137	0	5.4e-05	0	4.7e-05	5.7e-05	0	0	7.2e-05	5.1e-05
CUFF.44200.1	chr8:57148580-57153268	+	0.75448	2e-06	0	0	0	0	0	0	0	0
CUFF.44200.3	chr8:57148580-57153268	+	1.09716	4.5e-05	0	0	0	0	0	0	0	0
CUFF.44200.4	chr8:57148580-57153268	+	2.73822	0.24533	0	0	0	0	0	0	0	0
CUFF.44200.2	chr8:57148580-57153823	+	1.22907	0	0	0	0	0	0	0	0	0
CUFF.44224.1	chr8:58264288-58357665	+	3.83024	0.191278	0	0	0	0	0	0	0	0
CUFF.44223.1	chr8:58611870-58614091	+	11.5337	0	0	0	0	0	0	0	0	0
CUFF.44229.1	chr8:58724629-58726129	-	1.57403	0	0.24616	0	0	0	0	0	0	0
CUFF.44392.1	chr8:64395623-64411762	+	3.23533	0.206284	0	0	0	0	0	0	0	0
CUFF.44600.1	chr8:77638598-77639947	-	2.93596	0	0	0	0	0	0	0	0	0.944525
CUFF.44647.1	chr8:78735798-78767651	+	1.69441	0	0	0	0	0	0	0	0	0
CUFF.44647.2	chr8:78737916-78767651	+	1.27506	0	0	0	0	0	0	0	0	0
CUFF.44686.1	chr8:81513202-81538158	-	5.58453	0	0	0	0	0	0	0	0	0
CUFF.44686.2	chr8:81530422-81538883	-	2.9783	0	0	0	0	0	0	0	0	0
CUFF.44686.3	chr8:81532228-81538883	-	3.72436	0	0	0	0	0	0	0	0	0
CUFF.44696.1	chr8:82702462-82703279	+	7.16901	0.468215	0.449685	0	0	0	1.29342	0.393435	0	0
CUFF.44728.1	chr8:84538531-84541147	+	2.09676	18.2263	0	2.04557	0.13316	0	0.105317	0	0.314331	0
CUFF.44866.3	chr8:94059389-94062863	-	8.43599	1e-06	0	0	0	0	0	0	0	0
CUFF.44866.2	chr8:94059389-94062948	-	7.08412	0	0	0	0	0	0	0	0	0
CUFF.44866.1	chr8:94059389-94063048	-	2.91965	0.083372	0	0	0	0	0	0	0	0
CUFF.44922.1	chr8:97007187-97008666	+	8.80376	0.349292	0.423405	0.960733	0.407484	0.082731	0.50146	0.174326	1.35238	3.08515
CUFF.44932.1	chr8:97323280-97360876	+	2.1133	1e-06	0	1e-06	0	0.032004	2e-06	1e-06	0	0
CUFF.44932.3	chr8:97356608-97360876	+	2.57709	0.273057	0	1.08715	0	0.109299	0.106853	0.065005	0	0
CUFF.44942.2	chr8:97749446-97812167	+	3.16393	0	0.023043	0	0	0	0.033139	0	0	0.15521
CUFF.44965.1	chr8:98443475-98454627	-	5.0859	0.070243	0	0	0	0	0	0	0	0
CUFF.44963.1	chr8:98455058-98455766	+	3.52318	0	0	0	0	0	0	0	0	0
CUFF.44974.1	chr8:99708531-99761289	-	5.47068	0.432847	0	0	0	0	0	0	0	0
CUFF.44979.1	chr8:100100072-100108617	+	3.46659	6.2884	0	0.338835	0	0	0	0	0	0
CUFF.45009.1	chr8:100849045-100850540	+	3.88281	0	0	0	0	0	0	0	0	0
CUFF.45044.1	chr8:102303506-102305278	+	2.0893	0	0	0	0	0	0	0	0	0
CUFF.45053.1	chr8:102409558-102411233	+	2.88789	0	0	0	0	0	0	0	0	0
CUFF.45053.2	chr8:102409606-102411233	+	1.57442	0	0	0	0	0	0	0	0	0
CUFF.45198.1	chr8:108444192-108446196	-	4.00072	0	0	0	0	0	0	0	0	0
CUFF.45212.1	chr8:109318540-109386132	+	17.1454	0	0	0	0	0	0	0	0	0
CUFF.45212.2	chr8:109320220-109386132	+	2.40968	0	0	0	0	0	0	0	0	0
CUFF.45218.1	chr8:111673162-111675439	-	5.47419	0	0.085082	0	0	0	0	0.074439	0	0.842352
CUFF.45240.1	chr8:112227689-112230630	+	1.67462	2.2e-05	0	0	1.6e-05	1.7e-05	2.3e-05	1.5e-05	0.039855	1.8e-05
CUFF.45240.2	chr8:112229368-112230630	+	5.56669	0.043784	0	0	0.1679	0.038332	0.049788	0.136355	0.103093	0.049337
CUFF.45333.1	chr9:12961195-12961773	+	2.10501	0	0	0	0	0	0	0	0	0
CUFF.45398.2	chr9:19101953-19162686	+	6.48313	0	0	0	0	0	0	0	0	0
CUFF.45398.1	chr9:19101953-19326260	+	11.219	0	0	0	0	0	0	0	0	0
CUFF.45433.1	chr9:20460872-20493179	+	19.661	0	0	0	0	0	0	0	0	0
CUFF.45445.1	chr9:22357672-22359670	+	5.89001	0.933513	0.79751	0	0.362655	0	0	0.348876	0.952386	0.341865
CUFF.45454.1	chr9:22609798-22846655	-	4.84212	0.415528	0	0.113806	0.077793	0	0.123046	0	0	0
CUFF.45511.2	chr9:25815138-25842734	-	3.45472	2.72384	4.09432	0.247546	0.846528	0.824246	1.33823	0.976956	0	3.18636
CUFF.45556.1	chr9:30140922-30147719	+	3.82408	0	0	0	0	0	0	0.33855	0	0
CUFF.45603.1	chr9:32310256-32320134	+	35.8109	0	2.2e-05	2.8e-05	2e-05	2.4e-05	3.2e-05	1.9e-05	3.1e-05	2.2e-05
CUFF.45603.2	chr9:32310256-32320134	+	39.7376	0	0.045679	0.008654	0.04745	0.043348	0.093862	0.045678	0.018619	0.025389
CUFF.45667.1	chr9:35170685-35676901	+	2.20729	0.035077	0	0	0	0	0	0	0	0
CUFF.45667.2	chr9:35381730-35528099	+	6.33054	0.220063	0	0	0	0	0	0	0	0
CUFF.45720.1	chr9:36272693-36361132	-	2.12388	0.152934	0	0	0	0	0	0	0	0
CUFF.45754.2	chr9:38891176-38977377	-	7.32287	0	0.863379	0	0	0	0	0	0.061715	0
CUFF.45772.1	chr9:39387781-39391053	-	4.23506	14.6218	1.0143	3.85476	0.658954	0.160438	0.625162	1.77485	0.623142	1.10504
CUFF.45870.1	chr9:42550746-42551309	-	4.63313	9.81154	1.35063	2.24566	0.153574	0	0.485599	0	0.484338	0.69919
CUFF.45908.1	chr9:43690928-43691382	+	5.79675	0	0	0	0	0	0	0	0	0
CUFF.45931.1	chr9:44310077-44311110	-	9.3462	0	0	0	0	0	0	0	0	0
CUFF.45931.3	chr9:44310077-44311766	-	3.9546	0	0	0	0	0	0	0	0	0
CUFF.45931.2	chr9:44310077-44311872	-	5.81753	0.181041	0	0	0	0	0	0	0	0
CUFF.46075.1	chr9:53637191-53641473	-	7.21507	0	0	0	0	0	0.001113	0	0	0.000764
CUFF.46075.2	chr9:53637191-53641473	-	49.0066	0	0	0	0	0	0.077503	0	0	0.025404
CUFF.46069.1	chr9:53641720-53642909	+	1.68388	0.147809	0	0	0.108417	0	0.085754	0	0.341134	0.220521
CUFF.46070.1	chr9:53644574-53645268	-	2.33375	0.223571	0	0	0	0	0	0	0	0
CUFF.46113.1	chr9:56054835-56068247	-	5.13257	0.618437	0	0.112856	0	0	0	0	0	0
CUFF.46157.1	chr9:60494147-60555492	-	9.15536	0.390783	0.01166	0	0.010597	0	0.067075	0	0	0.034091
CUFF.46225.1	chr9:65764361-65766999	+	0.964891	0.147996	0	0	0	0	0	0	0	0
CUFF.46278.1	chr9:70310055-70339445	+	1.0213	0	0	0	2.6e-05	0	0	0	0	0
CUFF.46278.2	chr9:70310067-70339445	+	1.63919	0.003011	0	0	0.001869	0	0	0	0	0
CUFF.46278.3	chr9:70325434-70339445	+	1.41472	6.8e-05	0	0	8.4e-05	0	0	0	0	0
CUFF.46278.4	chr9:70325438-70339445	+	3.67941	0.076989	0	0	0.02671	0	0	0	0	0
CUFF.46316.1	chr9:74848304-74954840	+	18.6706	0	0	2.41745	1.81867	0.402464	2.09098	0	0.260782	7.73539
CUFF.46337.1	chr9:76725712-76736907	+	4.03492	0	0	0	0	0	0	0	0	0
CUFF.46419.1	chr9:82511047-82512391	-	1.24314	0	0.26773	0	0	0	0.064172	0	0	0
CUFF.46441.1	chr9:85510086-85517363	-	1.24566	0.070618	0	0	0	0	0	0	0	0
CUFF.46442.1	chr9:85625712-85626565	-	5.41056	0	0	0	0	0	0	0	0	0
CUFF.46470.1	chr9:87047716-87120204	+	8.81845	0	0	0	0	0	0	0	0	0
CUFF.46491.1	chr9:89307935-89315313	-	2.78528	115.611	27.0897	12.1877	5.2554	0	32.0837	0.697092	4.28918	7.86688
CUFF.46573.1	chr9:94797810-94804376	-	2.14091	0	0	0	0	0	0.133944	0	0	0
CUFF.46591.1	chr9:95329918-95330362	-	29.4882	0	0	0	0	0	0	0	0	0
CUFF.46605.1	chr9:95830199-95830570	+	43.1044	0	0	0	0	0	0	0	0	0
CUFF.46654.1	chr9:96865440-96871326	-	3.30034	4.96047	0	0.848547	0	0	0	0.069767	0	0
CUFF.46728.1	chr9:103083893-103086815	+	6.41296	2.23483	0.307943	0.204804	0.026657	0.024355	0.04745	0	0	0.360229
CUFF.46793.1	chrX:1863736-1895658	-	2.19213	0	0	0	0	0	0	0	0	0
CUFF.46793.3	chrX:1877404-1884477	-	3.26799	0	0	0	0	0	0	0	0	0
CUFF.46793.2	chrX:1877404-1895636	-	4.12742	0	0	0	0	0	0	0	0	0
CUFF.46799.2	chrX:2329172-2336579	-	6.24378	0	0	0	0	0	0	0	0	0
CUFF.46841.1	chrX:3975912-3976643	-	15.4472	0	0	0	0	0	0	0	0	0
CUFF.46893.1	chrX:6405439-6406892	-	1.3433	0	0	0	0	0	0	0	0	0
CUFF.46898.1	chrX:6815378-6828793	-	1.99557	0	0	0	0	0	0	0	0	0
CUFF.46905.1	chrX:6929528-6932598	-	1.64969	0	0	0	0	0	0	0	0	0
CUFF.46907.1	chrX:6967328-6990268	-	1.99958	0	0	0	0	0	0	0	0	0.106734
CUFF.46907.2	chrX:6967328-7001948	-	1.15209	0	0	0	0	0	0	0	0	8e-06
CUFF.46930.1	chrX:8124656-8128131	+	1.92642	0.305199	0	0.173031	0	0	0	0	0	0
CUFF.46965.1	chrX:11649091-11708741	+	7.16535	0	0	0	0	0	0	0	0	0
CUFF.46965.2	chrX:11649091-11720271	+	34.1724	0	0	0	0	0	0	0	0	0
CUFF.46976.1	chrX:12927034-12930539	-	1.60641	0	0	0	0	0	0	0	0	0
CUFF.46983.1	chrX:12937408-13073219	-	9.03855	0	0	0	0	0	0	0	0	0
CUFF.46983.2	chrX:12937408-13073219	-	2.00574	0	0	0	0	0	0	0	0	0
CUFF.46999.1	chrX:13926456-13928881	-	1.52792	0.239554	0.129376	0	0.117619	0	0	0	0	0
CUFF.47000.1	chrX:13929588-13930488	+	6.29751	0	0	0	0	0.181942	0.236317	0	0.235675	0
CUFF.47035.1	chrX:17256253-17257544	-	9.15277	0	0	0	0	0	0	0	0	0
CUFF.47067.2	chrX:17771230-17774420	+	1.22438	0	0	0	0	0	0	0	0	0
CUFF.47067.1	chrX:17771230-17780439	+	3.86439	0	0	0	0	0.123922	0	0	0	0
CUFF.47049.1	chrX:17934269-17938040	+	3.38293	0	0	0	0	0	0	0	0	0
CUFF.47112.1	chrX:21296465-21299013	-	13.2419	0	0	0	0	0	0	0	0	0
CUFF.47146.1	chrX:26506595-26523283	-	97.3915	0	0	0	0	0	0	0	0	0
CUFF.47146.2	chrX:26506595-26523283	-	10.403	2.8e-05	0	0.033567	0	0	0	0	0	0.024224
CUFF.47146.3	chrX:26506595-26523283	-	24.1555	0.035599	0	0	0	0	0	0	0	0
CUFF.47312.2	chrX:44791045-44822664	+	9.11057	0	0	0	0.119324	0	0.188689	0	0	0.225352
CUFF.47318.1	chrX:47702287-47751274	-	1.58145	0.359138	0	0	0.112708	0	0.315952	0.384427	0	0.49853
CUFF.47318.2	chrX:47716374-47751274	-	3.69839	0.406281	0	0	0.213611	0	0	0.31433	0	0.519983
CUFF.47379.1	chrX:54953943-54954862	+	8.02564	0	0	0	0	0	0	0	0	0
CUFF.47476.1	chrX:59123789-59126093	-	21.0558	0	0	0	0	0	0	0	0	0
CUFF.47516.1	chrX:62867436-62867970	+	5.15448	0	0	0	0	0	0	0	0	0
CUFF.47542.1	chrX:65562260-65567844	+	5.5962	0	0	0	0	0	0	0	0	0
CUFF.47542.2	chrX:65562260-65595752	+	1.91721	6e-06	5e-06	7e-06	4e-06	6e-06	7e-06	4e-06	0	5e-06
CUFF.47542.3	chrX:65575135-65595752	+	1.20454	0.093022	0.121547	0.064665	0.022091	0.008966	0.034954	0.021265	0	0.035034
CUFF.47672.1	chrX:82028101-82028544	+	15.863	3.09812	7.65385	6.78714	24.7865	20.2448	18.9571	11.9048	0.613759	12.1879
CUFF.47676.1	chrX:82286126-82287697	+	2.74325	0.563661	0	0	0	0	0	0	0	0
CUFF.47758.1	chrX:86215119-86223003	-	34.3751	0	0	0	0	0	0	0	0	0
CUFF.47928.1	chrX:95969574-95994893	+	43.7853	0.223886	0.537078	0.115224	0.448759	0.038366	0.311449	0.341054	0.160846	2.21095
CUFF.47956.1	chrX:96798281-96801752	-	16.8535	1.59705	1.53796	0.136381	0.932331	0.794678	0.884724	0.358823	0.293624	0.906352
CUFF.48025.1	chrX:107122118-107124831	-	6.01889	0	0	0	0	0	0	0	0.059932	0
CUFF.48024.1	chrX:107152035-107156287	+	2.46737	0	0	0	0	0	0	0	0	0
CUFF.48042.1	chrX:108141325-108143882	+	3.54046	0	0	0	0	0	0	0	0	0
CUFF.48056.1	chrX:108464874-108624664	-	2.98636	0	0	0	0	0	0	0	0	1e-06
CUFF.48056.2	chrX:108577599-108624664	-	3.2315	0	0	0	0	0	0	0	0	0.020708
CUFF.48056.3	chrX:108577599-108624664	-	8.2629	0	0	0	0	0	0	0	0	0.017651
CUFF.48057.1	chrX:108623915-108629350	+	3.2581	0	0	0	0	0	0	0	0	0
CUFF.48057.2	chrX:108627382-108629350	+	3.19605	0	0	0	0	0	0	0	0	0
CUFF.48090.1	chrX:110190188-110198899	+	12.7913	0	0	0	0	0	0	0	0	0
CUFF.48151.3	chrX:111972775-111998934	-	1.44335	0	0	0	0	0	0.046022	0	0	0
CUFF.48151.2	chrX:111972775-111998972	-	2.5574	0	0	0	0	0	0.00071	0	0	0
CUFF.48154.1	chrX:112286232-112295104	-	6.15616	1.48801	0	0	0.282551	0	0.595826	0	0	0.182922
CUFF.48177.1	chrX:114854718-114859631	+	1.82243	0	0	0.176199	0	0	0	0	0	0
CUFF.48275.1	chrX:120893916-121054242	-	3.94596	0	0	0	0	0	0	0	0	0.688303
CUFF.48283.3	chrX:121165087-121180417	+	1.71779	0	0	3e-06	0	0	0	0	0	0
CUFF.48283.4	chrX:121165087-121180417	+	5.93208	0	0	0.073956	0	0	0	0	0	0
CUFF.48283.5	chrX:121165087-121180417	+	3.90802	0	0	2e-06	0	0	0	0	0	0
CUFF.48283.1	chrX:121165087-121240037	+	2.37908	0	0	0	0	0	0	0	0	0
CUFF.48283.2	chrX:121165087-121264495	+	1.94002	0.05005	0	0	0	0	0	0	0	0
CUFF.48293.1	chrX:122670805-122776491	+	9.18977	0	0.01853	0	0	0	0	0	0	0.042832
CUFF.48358.1	chrX:126305404-126307750	+	1.5488	1.27592	2.31916	0.717397	1.76508	1.91095	2.09424	0.754999	0.462762	3.66248
CUFF.48359.1	chrX:126373205-126375912	+	9.63931	32.3715	0	6.93103	2.03675	3.29685	3.21162	8.46661	0	2.15992
CUFF.48392.1	chrX:127020119-127032707	+	4.39169	0	0	0	0	0	0	0	0	0.000445
CUFF.48392.2	chrX:127020119-127032707	+	38.1734	0	0	0	0	0	0	0	0	0.021007
CUFF.48389.1	chrX:127864957-127959494	+	5.22577	0	0	0	0.021056	0	0	0	0	0.066863
CUFF.48402.1	chrX:128296648-128304367	-	2.1221	0	0	0	0.099979	0	0	0	0.00032	0
CUFF.48402.2	chrX:128296648-128304367	-	2.05912	0	0	0	0.000767	0	0	0	0.344417	0
CUFF.48466.1	chrX:132638030-132640539	-	14.4425	0	0	0	0	0	0	0	0	0
CUFF.48468.2	chrX:132887002-132888385	+	7.25182	0	0	0	0	0	0	0	0	0
CUFF.48476.2	chrX:133324602-133326961	-	30.2146	0.194528	0	0.212137	0.217506	0.529758	1.26149	0.418605	0.114112	0.144346
CUFF.48491.1	chrX:133485258-133502258	-	25.8113	0	0	0	0	0	0	0	0	0
CUFF.48515.1	chrX:134379809-134387021	+	2.67762	0	0	0.298889	0	0	0	0	0	0
CUFF.48532.1	chrX:134465993-134497581	-	2.52023	0	0	0	0	0	0	0	0.039495	0
CUFF.48555.1	chrX:135762890-135779359	+	3.55933	0	0	0	0	0	0	0	0	0
CUFF.48565.1	chrX:136707674-136709479	+	1.69584	0	0	0	0.017091	0	0.054078	0	0	0
CUFF.48565.2	chrX:136707674-136709479	+	0.843215	0	0	0	0.017009	0	0.053822	0	0	0
CUFF.48628.1	chrX:137877034-137882049	+	21.5466	0	0	0	0	0	0	0	0.108972	0
CUFF.48641.1	chrX:140724104-140866944	-	17.3774	0	0	0	0	0	0	0	0	0
CUFF.48695.1	chrX:146462137-146481742	-	1.88912	0	0	0	0	0.038703	0	0	0	0
CUFF.48700.1	chrX:147505338-147553796	+	3.3612	0	0	0	0.356159	0	0.140825	0.514038	0	15.6548
